# Supplementary material for: Exploring the relationship between methylation of the cortisol receptor genes and brain and cognitive outcomes in individuals with elevated amyloid-β
Source: Research Square preprint supplement (doi:10.21203/rs.3.rs-7540786/v1), 2025-09-10
Supplement: Supplementary file 1 [file f344fcec0e6fd7455cf6289e.xlsx]

## Sheet: Table S1
	Table S1. Sub-population demographics
	Participants cognitively unimpaired at baseline with accumulating Aβ and methylation data available
		ADNI	AIBL	p
	n	102	305
	Age mean(sd)	74.8 (6.1)	73.2 (6.3)	0.03
	Sex			1
	Male	43(42.2%)	128(42%)
	Female	59(57.8%)	177(58%)
	APOE-e4			0.57
	ε4-	70(68.6%)	198(64.9%)
	ε4+	32(31.4%)	107(35.1%)
	Baseline Centiloid Availability
		ADNI	AIBL	p
		102	305
	Age mean(sd)	74.8 (6.1)	73.2 (6.3)	0.03
	Sex			1
	Male	43(42.2%)	128(42%)
	Female	59(57.8%)	177(58%)
	APOE-e4			0.57
	ε4-	70(68.6%)	198(64.9%)
	ε4+	32(31.4%)	107(35.1%)
	Baseline Cognition Availabiliy
		ADNI	AIBL	p
	n	101	305
	Age mean(sd)	74.4 (5.9)	71.4 (6.6)	<0.001
	Sex			1
	Male	43(42.6%)	128(42%)
	Female	58(57.4%)	177(58%)
	APOE-e4			0.61
	ε4-	69(68.3%)	198(64.9%)
	ε4+	32(31.7%)	107(35.1%)
	Education			<0.001
	0-8		23(7.5%)
	9-12	12(11.9%)	123(40.3%)
	13-15	21(20.8%)	63(20.7%)
	15+	68(67.3%)	94(30.8%)
	Missing		2(0.7%)
	Baseline Brain Volume Availability
		ADNI	AIBL	p
	n	101	292
	Age mean(sd)	74.5 (6.2)	73.2 (6.2)	0.06
	Sex			0.79
	Male	43(42.6%)	118(40.4%)
	Female	58(57.4%)	174(59.6%)
	APOE-e4			0.47
	ε4-	70(69.3%)	189(64.7%)
	ε4+	31(30.7%)	103(35.3%)
	Longitudinal Centiloid Availability
		ADNI	AIBL	p
	n	93	277
	Age mean(sd)	74.5 (5.9)	71 (6.5)	<0.001
	Sex			0.71
	Male	42(45.2%)	117(42.2%)
	Female	51(54.8%)	160(57.8%)
	APOE-e4			1
	ε4-	63(67.7%)	186(67.1%)
	ε4+	30(32.3%)	91(32.9%)
	Longitudinal Cognition Availability
		ADNI	AIBL	p
	n	93	273
	Age mean(sd)	74.4 (5.9)	70.8 (6.4)	<0.001
	Sex			0.74
	Male	41(44.1%)	113(41.4%)
	Female	52(55.9%)	160(58.6%)
	APOE-e4			0.85
	ε4-	64(68.8%)	183(67%)
	ε4+	29(31.2%)	90(33%)
	Education			<0.001
	0-8		21(7.7%)
	9-12	11(11.8%)	111(40.7%)
	13-15	21(22.6%)	54(19.8%)
	15+	61(65.6%)	86(31.5%)
	Missing		1(0.4%)
	Longitudinal Brain Volume Availability
		ADNI	AIBL	p
	n	91	126
	Age mean(sd)	73.9 (5.8)	70.4 (6.3)	<0.001
	Sex			0.73
	Male	41(45.1%)	61(48.4%)
	Female	50(54.9%)	65(51.6%)
	APOE-e4			0.15
	ε4-	65(71.4%)	77(61.1%)
	ε4+	26(28.6%)	49(38.9%)
	Participants included in methylation x GDS/HADS interaction analyses
		ADNI	AIBL	p
	n	102	300
	Age mean(sd)	74.8 (6.1)	73.2 (6.3)	0.03
	Sex			1
	Male	43(42.2%)	125(41.7%)
	Female	59(57.8%)	175(58.3%)
	APOE-e4			0.58
	ε4-	70(68.6%)	195(65%)
	ε4+	32(31.4%)	105(35%)
	Centiloid mean(sd)	27.3 (36.3)	29.1 (35.8)	0.67
	Participants with Stress Outcome Data and Baseline Centiloid Data
		ADNI	AIBL	p
	n	102	300
	Age mean(sd)	74.8 (6.1)	73.2 (6.3)	0.03
	Sex			1
	Male	43(42.2%)	125(41.7%)
	Female	59(57.8%)	175(58.3%)
	APOE-e4			0.58
	ε4-	70(68.6%)	195(65%)
	ε4+	32(31.4%)	105(35%)
	Centiloid mean(sd)	27.3 (36.3)	29.1 (35.8)	0.67
	Participants with Stress Outcome Data and Baseline Cognition Data
		ADNI	AIBL	p
	n	101	300
	Age mean(sd)	74.4 (5.9)	71.4 (6.6)	<0.001
	Sex			0.97
	Male	43(42.6%)	125(41.7%)
	Female	58(57.4%)	175(58.3%)
	APOE-e4			0.63
	ε4-	69(68.3%)	195(65%)
	ε4+	32(31.7%)	105(35%)
	Education			<0.001
	0-8		20(6.7%)
	9-12	12(11.9%)	122(40.7%)
	13-15	21(20.8%)	62(20.7%)
	15+	68(67.3%)	94(31.3%)
	Missing		2(0.7%)
	Participants with Stress Outcome Data and Baseline Brain Volume Data
		ADNI	AIBL	p
	n	101	288
	Age mean(sd)	74.5 (6.2)	73.2 (6.2)	0.07
	Sex			0.77
	Male	43(42.6%)	116(40.3%)
	Female	58(57.4%)	172(59.7%)
	APOE-e4			0.5
	ε4-	70(69.3%)	187(64.9%)
	ε4+	31(30.7%)	101(35.1%)
	Participants with Stress Outcome Data and Longitudinal Centildoid Measures
		ADNI	AIBL	p
	n	93	274
	Age mean(sd)	74.5 (5.9)	71 (6.5)	<0.001
	Sex			0.68
	Male	42(45.2%)	115(42%)
	Female	51(54.8%)	159(58%)
	APOE-e4			1
	ε4-	63(67.7%)	184(67.2%)
	ε4+	30(32.3%)	90(32.8%)
	Participants with Stress Outcome Data and Longitudinal Cognition Measures
		ADNI	AIBL	p
	n	93	269
	Age mean(sd)	74.4 (5.9)	70.8 (6.4)	<0.001
	Sex			0.68
	Male	41(44.1%)	110(40.9%)
	Female	52(55.9%)	159(59.1%)
	APOE-e4			0.83
	ε4-	64(68.8%)	180(66.9%)
	ε4+	29(31.2%)	89(33.1%)
	Education			<0.001
	0-8	11(11.8%)	19(7.1%)
	9-12	21(22.6%)	110(40.9%)
	13-15	61(65.6%)	53(19.7%)
	15+	19(7.1%)	86(32%)
	Missing		1(0.4%)
	Participants with Stress Outcome Data and Longitudinal Brain Volume Measures
		ADNI	AIBL	p
	n	91	124
	Age mean(sd)	73.9 (5.8)	70.4 (6.3)	<0.001
	Sex			0.73
	Male	41(45.1%)	60(48.4%)
	Female	50(54.9%)	64(51.6%)
	APOE-e4			0.16
	ε4-	65(71.4%)	76(61.3%)
	ε4+	26(28.6%)	48(38.7%)

## Sheet: Table S2
	Table S2. CpG Sites
	AIBL							ADNI
	CpG Site	Location build37	Region	Gene Location	Methylation β Values			CpG Site	Location build37	Region	Gene Location	Methylation β Values
					Mean	SD	Range					Mean	SD	Range
	cg23650353	chr4:148993643	Open Sea	Down-Stream	0.923	0.01	0.091	cg23650353	chr4:148993643	Open Sea	Down-Stream	0.932	0.01	0.097
	cg19491599	chr4:149000607	Open Sea	Gene-Body	0.846	0.01	0.096	cg19491599	chr4:149000607	Open Sea	Gene-Body	0.799	0.03	0.291
	cg10207656	chr4:149019526	Open Sea	Gene-Body	0.909	0.01	0.088	cg10207656	chr4:149019526	Open Sea	Gene-Body	0.911	0.01	0.083
								cg07760722	chr4:149033953	Open Sea	Gene-Body	0.904	0.01	0.085
	cg09143276	chr4:149066518	Open Sea	Gene-Body	0.808	0.02	0.131	cg09143276	chr4:149066518	Open Sea	Gene-Body	0.79	0.05	0.374
	cg13000004	chr4:149074093	Open Sea	Gene-Body	0.87	0.01	0.098	cg13000004	chr4:149074093	Open Sea	Gene-Body	0.819	0.03	0.235
	cg10590842	chr4:149083955	Open Sea	Gene-Body	0.904	0.01	0.074	cg10590842	chr4:149083955	Open Sea	Gene-Body	0.914	0.01	0.08
	cg21701890	chr4:149094632	Open Sea	Gene-Body	0.616	0.03	0.173	cg21701890	chr4:149094632	Open Sea	Gene-Body	0.625	0.03	0.237
	cg27234800	chr4:149116611	Open Sea	Gene-Body	0.89	0.06	0.395	cg27234800	chr4:149116611	Open Sea	Gene-Body	0.868	0.04	0.379
	cg25672354	chr4:149122383	Open Sea	Gene-Body	0.867	0.02	0.125	cg25672354	chr4:149122383	Open Sea	Gene-Body	0.893	0.01	0.1
	cg10993059	chr4:149123062	Open Sea	Gene-Body	0.892	0.01	0.123	cg10993059	chr4:149123062	Open Sea	Gene-Body	0.866	0.02	0.208
	cg07335874	chr4:149136507	Open Sea	Gene-Body	0.898	0.01	0.076	cg07335874	chr4:149136507	Open Sea	Gene-Body	0.907	0.01	0.089
	cg08264907	chr4:149144045	Open Sea	Gene-Body	0.904	0.01	0.084	cg08264907	chr4:149144045	Open Sea	Gene-Body	0.86	0.02	0.228
	cg07275757	chr4:149189974	Open Sea	Gene-Body	0.896	0.01	0.096	cg07275757	chr4:149189974	Open Sea	Gene-Body	0.895	0.01	0.064
	cg13157799	chr4:149191991	Open Sea	Gene-Body	0.059	0.01	0.148	cg13157799	chr4:149191991	Open Sea	Gene-Body	0.117	0.03	0.219
	cg00328411	chr4:149205617	Open Sea	Gene-Body	0.907	0.01	0.073	cg00328411	chr4:149205617	Open Sea	Gene-Body	0.853	0.03	0.254
	cg02471166	chr4:149244985	Open Sea	Gene-Body	0.629	0.02	0.157	cg02471166	chr4:149244985	Open Sea	Gene-Body	0.658	0.03	0.244
								cg12841684	chr4:149251768	Open Sea	Gene-Body	0.909	0.01	0.124
	cg27225476	chr4:149275542	Open Sea	Gene-Body	0.859	0.01	0.117	cg27225476	chr4:149275542	Open Sea	Gene-Body	0.776	0.05	0.392
	cg06240648	chr4:149289762	Open Sea	Gene-Body	0.909	0.01	0.067	cg06240648	chr4:149289762	Open Sea	Gene-Body	0.861	0.02	0.171
	cg04867484	chr4:149297469	Open Sea	Gene-Body	0.061	0.02	0.181	cg04867484	chr4:149297469	Open Sea	Gene-Body	0.067	0.03	0.476
	cg19496136	chr4:149336765	Open Sea	Gene-Body	0.751	0.04	0.331	cg19496136	chr4:149336765	Open Sea	Gene-Body	0.656	0.07	0.451
	cg17253842	chr4:149347991	Open Sea	Gene-Body	0.871	0.02	0.113	cg17253842	chr4:149347991	Open Sea	Gene-Body	0.893	0.02	0.117
	cg19650300	chr4:149357960	Open Sea	Gene-Body	0.872	0.01	0.095	cg19650300	chr4:149357960	Open Sea	Gene-Body	0.822	0.03	0.24
	cg09238384	chr4:149358199	Open Sea	Gene-Body	0.88	0.01	0.105	cg09238384	chr4:149358199	Open Sea	Gene-Body	0.832	0.03	0.265
	cg07651033	chr4:149359043	Open Sea	Gene-Body	0.891	0.01	0.08	cg07651033	chr4:149359043	Open Sea	Gene-Body	0.919	0.01	0.069
	cg23329208	chr4:149360981	North Shelf	Gene-Body	0.892	0.01	0.089	cg23329208	chr4:149360981	North Shelf	Gene-Body	0.823	0.04	0.386
	cg05437692	chr4:149362435	North Shore	Gene-Body	0.289	0.04	0.322	cg05437692	chr4:149362435	North Shore	Gene-Body	0.291	0.05	0.404
	cg27460943	chr4:149362809	North Shore	Gene-Body	0.083	0.02	0.156	cg27460943	chr4:149362809	North Shore	Gene-Body	0.104	0.03	0.314
	cg01576854	chr4:149363450	CpG Island	Gene-Body	0.073	0.01	0.064	cg01576854	chr4:149363450	CpG Island	Gene-Body	0.064	0.01	0.159
	cg13996731	chr4:149363522	CpG Island	Gene-Body	0.059	0.01	0.086	cg13996731	chr4:149363522	CpG Island	Gene-Body	0.052	0.01	0.078
	cg20140452	chr4:149363715	CpG Island	Gene-Body	0.07	0.01	0.061	cg20140452	chr4:149363715	CpG Island	Gene-Body	0.083	0.02	0.123
	cg10621979	chr4:149365824	CpG Island	Gene-Body	0.053	0.01	0.175
	cg11239219	chr4:149365887	CpG Island	Promoter	0.054	0.01	0.199	cg11239219	chr4:149365887	CpG Island	Promoter	0.062	0.02	0.296
								cg24117104	chr4:149366997	CpG Island	Promoter	0.05	0.01	0.125
	cg10002915	chr4:149369175	South Shelf	Promoter	0.542	0.09	0.731	cg10002915	chr4:149369175	South Shelf	Promoter	0.631	0.1	0.564
	cg15374100	chr5:142651239	Open Sea	Down-Stream	0.87	0.01	0.099	cg15374100	chr5:142651239	Open Sea	Down-Stream	0.81	0.03	0.295
	cg15740681	chr5:142653066	Open Sea	Down-Stream	0.891	0.01	0.068	cg15740681	chr5:142653066	Open Sea	Down-Stream	0.851	0.02	0.205
								cg23273257	chr5:142658828	Open Sea	Gene-Body	0.922	0.01	0.058
	cg26081259	chr5:142659682	Open Sea	Gene-Body	0.926	0.01	0.051	cg26081259	chr5:142659682	Open Sea	Gene-Body	0.909	0.01	0.073
	cg13514002	chr5:142677292	Open Sea	Gene-Body	0.911	0.01	0.073	cg13514002	chr5:142677292	Open Sea	Gene-Body	0.916	0.01	0.073
	cg24801588	chr5:142689858	Open Sea	Gene-Body	0.876	0.01	0.081	cg24801588	chr5:142689858	Open Sea	Gene-Body	0.834	0.02	0.18
	cg00407401	chr5:142690959	Open Sea	Gene-Body	0.884	0.01	0.122	cg00407401	chr5:142690959	Open Sea	Gene-Body	0.827	0.04	0.331
	cg19457823	chr5:142692961	Open Sea	Gene-Body	0.852	0.05	0.45	cg19457823	chr5:142692961	Open Sea	Gene-Body	0.797	0.05	0.532
	cg12741214	chr5:142695619	Open Sea	Gene-Body	0.922	0.01	0.054	cg12741214	chr5:142695619	Open Sea	Gene-Body	0.916	0.01	0.071
	cg04457787	chr5:142695636	Open Sea	Gene-Body	0.919	0.01	0.06	cg04457787	chr5:142695636	Open Sea	Gene-Body	0.919	0.01	0.068
	cg20728768	chr5:142696594	Open Sea	Gene-Body	0.285	0.05	0.314	cg20728768	chr5:142696594	Open Sea	Gene-Body	0.314	0.07	0.466
	cg25708981	chr5:142697868	Open Sea	Gene-Body	0.813	0.04	0.265	cg25708981	chr5:142697868	Open Sea	Gene-Body	0.702	0.07	0.576
	cg19645279	chr5:142702733	Open Sea	Gene-Body	0.506	0.03	0.23	cg19645279	chr5:142702733	Open Sea	Gene-Body	0.527	0.05	0.353
	cg19176661	chr5:142718549	Open Sea	Gene-Body	0.903	0.01	0.094	cg19176661	chr5:142718549	Open Sea	Gene-Body	0.885	0.02	0.208
	cg07715663	chr5:142721796	Open Sea	Gene-Body	0.9	0.01	0.059	cg07715663	chr5:142721796	Open Sea	Gene-Body	0.863	0.02	0.132
	cg24052866	chr5:142727470	Open Sea	Gene-Body	0.693	0.04	0.272	cg24052866	chr5:142727470	Open Sea	Gene-Body	0.761	0.05	0.284
	cg22233604	chr5:142729377	Open Sea	Gene-Body	0.804	0.02	0.182	cg22233604	chr5:142729377	Open Sea	Gene-Body	0.847	0.03	0.28
	cg03857453	chr5:142729913	Open Sea	Gene-Body	0.717	0.05	0.421	cg03857453	chr5:142729913	Open Sea	Gene-Body	0.781	0.05	0.316
	cg15115787	chr5:142730701	Open Sea	Gene-Body	0.233	0.05	0.338	cg15115787	chr5:142730701	Open Sea	Gene-Body	0.243	0.05	0.386
	cg12888360	chr5:142732502	Open Sea	Gene-Body	0.191	0.03	0.218	cg12888360	chr5:142732502	Open Sea	Gene-Body	0.267	0.04	0.307
								cg14621978	chr5:142735238	Open Sea	Gene-Body	0.872	0.02	0.181
	cg18484679	chr5:142740314	Open Sea	Gene-Body	0.854	0.02	0.163	cg18484679	chr5:142740314	Open Sea	Gene-Body	0.718	0.07	0.495
	cg16586394	chr5:142757011	Open Sea	Gene-Body	0.91	0.01	0.12	cg16586394	chr5:142757011	Open Sea	Gene-Body	0.908	0.01	0.082
	cg25535999	chr5:142757312	Open Sea	Gene-Body	0.894	0.01	0.09	cg25535999	chr5:142757312	Open Sea	Gene-Body	0.882	0.01	0.103
	cg03746860	chr5:142759375	Open Sea	Gene-Body	0.895	0.01	0.092	cg03746860	chr5:142759375	Open Sea	Gene-Body	0.874	0.01	0.103
	cg20598211	chr5:142762454	Open Sea	Gene-Body	0.917	0.01	0.074	cg20598211	chr5:142762454	Open Sea	Gene-Body	0.9	0.01	0.073
	cg05483455	chr5:142762613	Open Sea	Gene-Body	0.929	0.01	0.074	cg05483455	chr5:142762613	Open Sea	Gene-Body	0.914	0.01	0.099
	cg16594263	chr5:142768048	Open Sea	Gene-Body	0.92	0.01	0.06	cg16594263	chr5:142768048	Open Sea	Gene-Body	0.912	0.01	0.055
	cg16535116	chr5:142769612	Open Sea	Gene-Body	0.824	0.02	0.178	cg16535116	chr5:142769612	Open Sea	Gene-Body	0.741	0.04	0.331
	cg05900547	chr5:142769791	Open Sea	Gene-Body	0.824	0.02	0.155	cg05900547	chr5:142769791	Open Sea	Gene-Body	0.729	0.06	0.356
	cg19432243	chr5:142770757	Open Sea	Gene-Body	0.754	0.05	0.329	cg19432243	chr5:142770757	Open Sea	Gene-Body	0.543	0.11	0.656
	cg19820298	chr5:142770782	Open Sea	Gene-Body	0.784	0.06	0.307	cg19820298	chr5:142770782	Open Sea	Gene-Body	0.607	0.13	0.628
	cg27107893	chr5:142776274	Open Sea	Gene-Body	0.794	0.09	0.945	cg27107893	chr5:142776274	Open Sea	Gene-Body	0.593	0.13	0.893
	cg17342132	chr5:142780254	North Shore	Gene-Body	0.87	0.03	0.207	cg17342132	chr5:142780254	North Shore	Gene-Body	0.906	0.02	0.185
	cg07742588	chr5:142780439	North Shore	Gene-Body	0.791	0.04	0.383	cg07742588	chr5:142780439	North Shore	Gene-Body	0.719	0.05	0.476
	cg00294552	chr5:142780486	North Shore	Gene-Body	0.842	0.02	0.205	cg00294552	chr5:142780486	North Shore	Gene-Body	0.766	0.05	0.423
	cg16219186	chr5:142780531	North Shore	Gene-Body	0.885	0.02	0.183	cg16219186	chr5:142780531	North Shore	Gene-Body	0.873	0.02	0.118
	cg08845721	chr5:142780693	North Shore	Gene-Body	0.904	0.02	0.162	cg08845721	chr5:142780693	North Shore	Gene-Body	0.887	0.02	0.12
	cg12969488	chr5:142780984	North Shore	Gene-Body	0.696	0.04	0.274	cg12969488	chr5:142780984	North Shore	Gene-Body	0.768	0.05	0.316
	cg07733851	chr5:142781498	North Shore	Gene-Body	0.309	0.05	0.489	cg07733851	chr5:142781498	North Shore	Gene-Body	0.349	0.08	0.522
	cg27122725	chr5:142781723	North Shore	Gene-Body	0.08	0.01	0.082	cg27122725	chr5:142781723	North Shore	Gene-Body	0.194	0.07	0.427
	cg06952416	chr5:142781736	North Shore	Gene-Body	0.103	0.02	0.147	cg06952416	chr5:142781736	North Shore	Gene-Body	0.216	0.05	0.393
								cg20753294	chr5:142782791	CpG Island	Gene-Body	0.092	0.02	0.255
	cg15910486	chr5:142783621	CpG Island	Gene-Body	0.07	0.01	0.079	cg15910486	chr5:142783621	CpG Island	Gene-Body	0.056	0.02	0.104
	cg01967637	chr5:142784019	CpG Island	Gene-Body	0.059	0.01	0.087	cg01967637	chr5:142784019	CpG Island	Gene-Body	0.068	0.02	0.135
								cg19135245	chr5:142784187	CpG Island	Gene-Body	0.068	0.02	0.152
	cg26464411	chr5:142784222	CpG Island	Gene-Body	0.062	0.01	0.081	cg26464411	chr5:142784222	CpG Island	Gene-Body	0.098	0.03	0.218
	cg06968181	chr5:142784323	CpG Island	Gene-Body	0.052	0.01	0.084	cg06968181	chr5:142784323	CpG Island	Gene-Body	0.091	0.02	0.12
								cg18849621	chr5:142784382	CpG Island	Gene-Body	0.07	0.02	0.129
	cg21702128	chr5:142784721	CpG Island	Gene-Body	0.082	0.01	0.06	cg21702128	chr5:142784721	CpG Island	Gene-Body	0.073	0.01	0.082
								cg24026230	chr5:142785172	South Shore	Gene-Body	0.071	0.02	0.184
								cg13648501	chr5:142785258	South Shore	Gene-Body	0.075	0.02	0.153
	cg18718518	chr5:142785455	South Shore	Gene-Body	0.532	0.05	0.389	cg18718518	chr5:142785455	South Shore	Gene-Body	0.576	0.07	0.572
	cg13764763	chr5:142785501	South Shore	Gene-Body	0.854	0.06	0.522	cg13764763	chr5:142785501	South Shore	Gene-Body	0.888	0.04	0.413
								cg27345592	chr5:142786405	South Shore	Gene-Body	0.896	0.01	0.114
								cg07528216	chr5:142788776	South Shelf	Gene-Body	0.902	0.01	0.116
	cg16224829	chr5:142792698	Open Sea	Gene-Body	0.791	0.03	0.284	cg16224829	chr5:142792698	Open Sea	Gene-Body	0.827	0.03	0.257
	cg01751279	chr5:142793924	Open Sea	Gene-Body	0.84	0.04	0.293	cg01751279	chr5:142793924	Open Sea	Gene-Body	0.84	0.02	0.188
	cg23430507	chr5:142798375	Open Sea	Gene-Body	0.678	0.04	0.258	cg23430507	chr5:142798375	Open Sea	Gene-Body	0.733	0.05	0.293
	cg17349736	chr5:142802329	Open Sea	Gene-Body	0.869	0.02	0.139	cg17349736	chr5:142802329	Open Sea	Gene-Body	0.834	0.02	0.235
	cg14438279	chr5:142806343	Open Sea	Gene-Body	0.807	0.06	0.368	cg14438279	chr5:142806343	Open Sea	Gene-Body	0.825	0.04	0.313
	cg08423118	chr5:142808610	Open Sea	Gene-Body	0.776	0.07	0.321	cg08423118	chr5:142808610	Open Sea	Gene-Body	0.78	0.05	0.384
	cg23776787	chr5:142814315	Open Sea	Gene-Body	0.052	0.01	0.116
	cg03906910	chr5:142814388	Open Sea	Gene-Body	0.222	0.05	0.378	cg03906910	chr5:142814388	Open Sea	Gene-Body	0.245	0.07	0.611
								cg08818984	chr5:142814827	Open Sea	Gene-Body	0.069	0.02	0.161
	cg07589972	chr5:142815463	Open Sea	Promoter	0.901	0.01	0.098	cg07589972	chr5:142815463	Open Sea	Promoter	0.866	0.01	0.116
	cg12466613	chr5:142815469	Open Sea	Promoter	0.918	0.01	0.059	cg12466613	chr5:142815469	Open Sea	Promoter	0.889	0.01	0.134
	cg21979215	chr5:142815807	Open Sea	Promoter	0.771	0.07	0.396	cg21979215	chr5:142815807	Open Sea	Promoter	0.618	0.1	0.578
	cg11022710	chr5:142820479	Open Sea	Promoter	0.907	0.02	0.208	cg11022710	chr5:142820479	Open Sea	Promoter	0.911	0.01	0.085
	CpG sites investigated in the current study. The chromosome and base-pair location refers to position on build 37. The mean methylation, standard deviation (SD) and range of methylation for each cohort is given. Abbreviations: AIBL, Australian Imaging Biomarker and Lifestyle Study; ADNI, Alzheimer’s Disease Neuroimaging Initiative; bp, base pair; chr, chromosome; SD, standard deviation.

## Sheet: Table S3
	Table S3. Linear regression results for direct associations between CpG sites and brain-health outcomes
	Study	Brain Health outcome			CpG	n	β	95% CI	Nominal P	FDR P	Mean Methylation	SD Methylation	Methylation Range	Region	Location Build37
	AIBL	Cognition	PACC	Cross-Sectional	cg23650353	303	2.1878	[-4.014-8.39]	0.4899	0.925	0.92108	0.028	0.43394	OpenSea	chr4:148993643
		Cognition	PACC	Cross-Sectional	cg19491599	303	-2.1441	[-7.363-3.075]	0.4214	0.9249	0.84529	0.0161	0.20857	OpenSea	chr4:149000607
		Cognition	PACC	Cross-Sectional	cg10207656	303	6.9844	[0.413-13.556]	0.03812	0.7095	0.90855	0.01373	0.20071	OpenSea	chr4:149019526
		Cognition	PACC	Cross-Sectional	cg09143276	303	-0.8649	[-4.398-2.668]	0.63171	0.925	0.80845	0.02074	0.13091	OpenSea	chr4:149066518
		Cognition	PACC	Cross-Sectional	cg13000004	303	-4.0335	[-10.696-2.629]	0.23637	0.8777	0.86983	0.01161	0.09813	OpenSea	chr4:149074093
		Cognition	PACC	Cross-Sectional	cg10590842	303	-3.0509	[-10.333-4.231]	0.41221	0.9249	0.9034	0.01143	0.10122	OpenSea	chr4:149083955
		Cognition	PACC	Cross-Sectional	cg21701890	303	2.2919	[-1.085-5.669]	0.18449	0.8486	0.61622	0.02898	0.23369	OpenSea	chr4:149094632
		Cognition	PACC	Cross-Sectional	cg27234800	303	-0.4467	[-1.715-0.822]	0.49061	0.925	0.89127	0.0525	0.39493	OpenSea	chr4:149116611
		Cognition	PACC	Cross-Sectional	cg25672354	303	0.1486	[-4.225-4.522]	0.94696	0.9953	0.86697	0.01933	0.23574	OpenSea	chr4:149122383
		Cognition	PACC	Cross-Sectional	cg10993059	303	2.0984	[-4.523-8.72]	0.53501	0.925	0.892	0.014	0.24786	OpenSea	chr4:149123062
		Cognition	PACC	Cross-Sectional	cg07335874	303	3.7815	[-3.031-10.594]	0.2775	0.8833	0.89734	0.01678	0.25463	OpenSea	chr4:149136507
		Cognition	PACC	Cross-Sectional	cg08264907	303	-1.2053	[-10.484-8.073]	0.79921	0.9307	0.90365	0.00834	0.08404	OpenSea	chr4:149144045
		Cognition	PACC	Cross-Sectional	cg07275757	303	-3.7126	[-10.679-3.254]	0.29715	0.8833	0.89578	0.01331	0.13086	OpenSea	chr4:149189974
		Cognition	PACC	Cross-Sectional	cg13157799	303	6.1854	[-0.91-13.281]	0.08859	0.7095	0.05908	0.01227	0.14832	OpenSea	chr4:149191991
		Cognition	PACC	Cross-Sectional	cg00328411	303	6.4761	[-2.914-15.866]	0.17751	0.8486	0.90656	0.00839	0.10838	OpenSea	chr4:149205617
		Cognition	PACC	Cross-Sectional	cg02471166	303	1.1756	[-1.96-4.311]	0.46304	0.925	0.62905	0.02431	0.28086	OpenSea	chr4:149244985
		Cognition	PACC	Cross-Sectional	cg27225476	303	-0.0212	[-4.58-4.537]	0.99272	0.9953	0.85878	0.01502	0.11725	OpenSea	chr4:149275542
		Cognition	PACC	Cross-Sectional	cg06240648	303	-2.4104	[-11.17-6.349]	0.59009	0.925	0.90857	0.00875	0.08216	OpenSea	chr4:149289762
		Cognition	PACC	Cross-Sectional	cg04867484	303	-4.7319	[-8.819--0.645]	0.024	0.7095	0.06179	0.03171	0.6046	OpenSea	chr4:149297469
		Cognition	PACC	Cross-Sectional	cg19496136	303	0.7665	[-1.18-2.713]	0.44078	0.9249	0.74636	0.06158	0.84904	OpenSea	chr4:149336765
		Cognition	PACC	Cross-Sectional	cg17253842	303	1.0668	[-3.942-6.075]	0.67665	0.925	0.87057	0.02004	0.40157	OpenSea	chr4:149347991
		Cognition	PACC	Cross-Sectional	cg19650300	303	-1.1129	[-7.275-5.049]	0.72358	0.925	0.87161	0.0124	0.12937	OpenSea	chr4:149357960
		Cognition	PACC	Cross-Sectional	cg09238384	303	-0.9552	[-7.534-5.623]	0.77616	0.9307	0.88033	0.01059	0.10479	OpenSea	chr4:149358199
		Cognition	PACC	Cross-Sectional	cg07651033	303	-1.0157	[-6.069-4.038]	0.69392	0.925	0.891	0.01412	0.08448	OpenSea	chr4:149359043
		Cognition	PACC	Cross-Sectional	cg23329208	303	-4.0535	[-11.13-3.023]	0.26248	0.8833	0.89218	0.01003	0.08891	N_Shelf	chr4:149360981
		Cognition	PACC	Cross-Sectional	cg05437692	303	-2.3561	[-4.925-0.213]	0.07332	0.7095	0.28837	0.04393	0.32226	N_Shore	chr4:149362435
		Cognition	PACC	Cross-Sectional	cg27460943	303	0.1725	[-4.054-4.399]	0.93632	0.9953	0.08292	0.02603	0.31306	N_Shore	chr4:149362809
		Cognition	PACC	Cross-Sectional	cg01576854	303	5.1383	[-2.372-12.649]	0.18101	0.8486	0.07386	0.01207	0.20464	Island	chr4:149363450
		Cognition	PACC	Cross-Sectional	cg13996731	303	-2.5599	[-10.596-5.477]	0.53291	0.925	0.05943	0.00984	0.12921	Island	chr4:149363522
		Cognition	PACC	Cross-Sectional	cg20140452	303	-3.0411	[-10.505-4.423]	0.42519	0.9249	0.07045	0.00971	0.0619	Island	chr4:149363715
		Cognition	PACC	Cross-Sectional	cg10621979	303	-1.8453	[-9.533-5.842]	0.63837	0.925	0.05355	0.018	0.29521	Island	chr4:149365824
		Cognition	PACC	Cross-Sectional	cg11239219	303	-0.2213	[-7.323-6.88]	0.95134	0.9953	0.05479	0.02153	0.3658	Island	chr4:149365887
		Cognition	PACC	Cross-Sectional	cg10002915	303	-0.9908	[-1.898--0.084]	0.03312	0.7095	0.54242	0.08455	0.73095	S_Shelf	chr4:149369175
		Cognition	PACC	Cross-Sectional	cg15374100	303	-1.3638	[-7.607-4.879]	0.66885	0.925	0.86961	0.01354	0.2065	OpenSea	chr5:142651239
		Cognition	PACC	Cross-Sectional	cg15740681	303	-2.6714	[-11.107-5.764]	0.53529	0.925	0.89095	0.00925	0.09622	OpenSea	chr5:142653066
		Cognition	PACC	Cross-Sectional	cg26081259	303	-1.6032	[-11.217-8.011]	0.74402	0.925	0.92585	0.00714	0.05144	OpenSea	chr5:142659682
		Cognition	PACC	Cross-Sectional	cg13514002	303	3.7853	[-3.06-10.631]	0.27937	0.8833	0.9104	0.01216	0.16497	OpenSea	chr5:142677292
		Cognition	PACC	Cross-Sectional	cg24801588	303	-1.5114	[-8.158-5.135]	0.65617	0.925	0.87613	0.01121	0.08119	OpenSea	chr5:142689858
		Cognition	PACC	Cross-Sectional	cg00407401	303	4.6479	[-2.527-11.823]	0.20521	0.8582	0.88336	0.0113	0.12225	OpenSea	chr5:142690959
		Cognition	PACC	Cross-Sectional	cg19457823	303	0.0886	[-1.535-1.712]	0.91487	0.9953	0.85324	0.04572	0.44993	OpenSea	chr5:142692961
		Cognition	PACC	Cross-Sectional	cg12741214	303	1.5942	[-7.875-11.064]	0.74167	0.925	0.92153	0.00739	0.05446	OpenSea	chr5:142695619
		Cognition	PACC	Cross-Sectional	cg04457787	303	2.525	[-6.174-11.224]	0.56986	0.925	0.91851	0.00864	0.10367	OpenSea	chr5:142695636
		Cognition	PACC	Cross-Sectional	cg20728768	303	-0.3308	[-2.492-1.83]	0.76435	0.9307	0.28495	0.05593	0.42144	OpenSea	chr5:142696594
		Cognition	PACC	Cross-Sectional	cg25708981	303	0.481	[-1.587-2.549]	0.64884	0.925	0.81142	0.04619	0.93615	OpenSea	chr5:142697868
		Cognition	PACC	Cross-Sectional	cg19645279	303	1.4933	[-0.875-3.861]	0.21749	0.87	0.50627	0.03156	0.23017	OpenSea	chr5:142702733
		Cognition	PACC	Cross-Sectional	cg19176661	303	-0.0744	[-7.41-7.262]	0.98416	0.9953	0.90339	0.00908	0.09406	OpenSea	chr5:142718549
		Cognition	PACC	Cross-Sectional	cg07715663	303	-3.6523	[-13.158-5.853]	0.45201	0.9249	0.89993	0.0077	0.06068	OpenSea	chr5:142721796
		Cognition	PACC	Cross-Sectional	cg24052866	303	-1.8694	[-3.995-0.256]	0.08586	0.7095	0.69336	0.03805	0.44354	OpenSea	chr5:142727470
		Cognition	PACC	Cross-Sectional	cg22233604	303	-3.6173	[-7.303-0.069]	0.05542	0.7095	0.80239	0.02828	0.34628	OpenSea	chr5:142729377
		Cognition	PACC	Cross-Sectional	cg03857453	303	-1.8558	[-4.068-0.356]	0.10117	0.7159	0.71757	0.04588	0.42058	OpenSea	chr5:142729913
		Cognition	PACC	Cross-Sectional	cg15115787	303	1.2413	[-1.46-3.942]	0.36847	0.9249	0.2334	0.0467	0.33835	OpenSea	chr5:142730701
		Cognition	PACC	Cross-Sectional	cg12888360	303	1.5066	[-0.807-3.82]	0.20282	0.8582	0.19071	0.0335	0.21819	OpenSea	chr5:142732502
		Cognition	PACC	Cross-Sectional	cg18484679	303	-3.0453	[-8.098-2.008]	0.2385	0.8777	0.85401	0.0155	0.16305	OpenSea	chr5:142740314
		Cognition	PACC	Cross-Sectional	cg16586394	303	6.2874	[-0.909-13.484]	0.08791	0.7095	0.90913	0.01422	0.19939	OpenSea	chr5:142757011
		Cognition	PACC	Cross-Sectional	cg25535999	303	1.6635	[-5.246-8.573]	0.63736	0.925	0.89419	0.01191	0.0902	OpenSea	chr5:142757312
		Cognition	PACC	Cross-Sectional	cg03746860	303	-7.1849	[-14.029--0.341]	0.04054	0.7095	0.89502	0.01114	0.14119	OpenSea	chr5:142759375
		Cognition	PACC	Cross-Sectional	cg20598211	303	-1.4327	[-9.5-6.635]	0.72803	0.925	0.91627	0.01158	0.20941	OpenSea	chr5:142762454
		Cognition	PACC	Cross-Sectional	cg05483455	303	-1.4164	[-11.834-9.001]	0.79004	0.9307	0.92855	0.00637	0.07369	OpenSea	chr5:142762613
		Cognition	PACC	Cross-Sectional	cg16594263	303	2.1348	[-8.401-12.671]	0.69156	0.925	0.91923	0.01644	0.42455	OpenSea	chr5:142768048
		Cognition	PACC	Cross-Sectional	cg16535116	303	-1.0275	[-4.854-2.799]	0.59908	0.925	0.82395	0.0209	0.17773	OpenSea	chr5:142769612
		Cognition	PACC	Cross-Sectional	cg05900547	303	-0.5993	[-4.787-3.588]	0.77928	0.9307	0.82362	0.01868	0.15468	OpenSea	chr5:142769791
		Cognition	PACC	Cross-Sectional	cg19432243	303	0.1166	[-1.27-1.503]	0.86924	0.9752	0.75237	0.06043	0.89556	OpenSea	chr5:142770757
		Cognition	PACC	Cross-Sectional	cg19820298	303	-0.0294	[-1.37-1.311]	0.96575	0.9953	0.78285	0.05639	0.30689	OpenSea	chr5:142770782
		Cognition	PACC	Cross-Sectional	cg27107893	303	-0.0804	[-0.813-0.652]	0.82976	0.9431	0.79309	0.09578	0.9445	OpenSea	chr5:142776274
		Cognition	PACC	Cross-Sectional	cg17342132	303	-2.6133	[-6.296-1.069]	0.16536	0.8486	0.86999	0.03297	0.31216	N_Shore	chr5:142780254
		Cognition	PACC	Cross-Sectional	cg07742588	303	-1.4198	[-3.377-0.537]	0.15615	0.8486	0.78914	0.05595	0.91885	N_Shore	chr5:142780439
		Cognition	PACC	Cross-Sectional	cg00294552	303	1.6325	[-1.622-4.887]	0.3263	0.9097	0.84207	0.02221	0.20462	N_Shore	chr5:142780486
		Cognition	PACC	Cross-Sectional	cg16219186	303	-2.3221	[-6.527-1.883]	0.27998	0.8833	0.88479	0.02148	0.22312	N_Shore	chr5:142780531
		Cognition	PACC	Cross-Sectional	cg08845721	303	2.1225	[-2.029-6.273]	0.31711	0.9097	0.90291	0.02257	0.35006	N_Shore	chr5:142780693
		Cognition	PACC	Cross-Sectional	cg12969488	303	-1.9733	[-4.199-0.252]	0.0833	0.7095	0.6959	0.03946	0.36342	N_Shore	chr5:142780984
		Cognition	PACC	Cross-Sectional	cg07733851	303	-0.3014	[-1.589-0.987]	0.64686	0.925	0.31012	0.05444	0.48866	N_Shore	chr5:142781498
		Cognition	PACC	Cross-Sectional	cg27122725	303	-1.2336	[-8.051-5.584]	0.72311	0.925	0.08247	0.03649	0.61758	N_Shore	chr5:142781723
		Cognition	PACC	Cross-Sectional	cg06952416	303	-2.1544	[-6.889-2.58]	0.37324	0.9249	0.10317	0.01595	0.14679	N_Shore	chr5:142781736
		Cognition	PACC	Cross-Sectional	cg15910486	303	2.0144	[-4.229-8.258]	0.52766	0.925	0.06987	0.01223	0.07877	Island	chr5:142783621
		Cognition	PACC	Cross-Sectional	cg01967637	303	-1.3839	[-6.681-3.913]	0.60902	0.925	0.05849	0.01419	0.08687	Island	chr5:142784019
		Cognition	PACC	Cross-Sectional	cg26464411	303	-3.0481	[-8.774-2.678]	0.29763	0.8833	0.0622	0.01192	0.08127	Island	chr5:142784222
		Cognition	PACC	Cross-Sectional	cg06968181	303	-0.0413	[-13.772-13.689]	0.9953	0.9953	0.05291	0.02403	0.66787	Island	chr5:142784323
		Cognition	PACC	Cross-Sectional	cg21702128	303	2.0974	[-5.297-9.492]	0.57869	0.925	0.08227	0.00965	0.07742	Island	chr5:142784721
		Cognition	PACC	Cross-Sectional	cg18718518	303	-1.3313	[-2.877-0.215]	0.09254	0.7095	0.53255	0.05217	0.3892	S_Shore	chr5:142785455
		Cognition	PACC	Cross-Sectional	cg13764763	303	-0.0121	[-1.348-1.324]	0.98582	0.9953	0.85356	0.05856	0.5219	S_Shore	chr5:142785501
		Cognition	PACC	Cross-Sectional	cg16224829	303	1.7885	[-0.489-4.066]	0.12495	0.8211	0.79156	0.03531	0.28375	OpenSea	chr5:142792698
		Cognition	PACC	Cross-Sectional	cg01751279	303	2.1139	[-0.666-4.894]	0.13727	0.8419	0.83882	0.03986	0.35649	OpenSea	chr5:142793924
		Cognition	PACC	Cross-Sectional	cg23430507	303	1.2856	[-2.063-4.634]	0.45239	0.9249	0.67871	0.03655	0.31636	OpenSea	chr5:142798375
		Cognition	PACC	Cross-Sectional	cg17349736	303	-0.0374	[-5.253-5.178]	0.98878	0.9953	0.8687	0.01502	0.1392	OpenSea	chr5:142802329
		Cognition	PACC	Cross-Sectional	cg14438279	303	2.7834	[0.24-5.326]	0.03278	0.7095	0.80706	0.05892	0.46785	OpenSea	chr5:142806343
		Cognition	PACC	Cross-Sectional	cg08423118	303	-0.3079	[-1.393-0.778]	0.5787	0.925	0.77492	0.07191	0.32112	OpenSea	chr5:142808610
		Cognition	PACC	Cross-Sectional	cg23776787	303	-2.0251	[-9.782-5.731]	0.60923	0.925	0.05181	0.01906	0.42487	OpenSea	chr5:142814315
		Cognition	PACC	Cross-Sectional	cg03906910	303	-0.2606	[-2.642-2.121]	0.83033	0.9431	0.22081	0.05239	0.37839	OpenSea	chr5:142814388
		Cognition	PACC	Cross-Sectional	cg07589972	303	4.0676	[-5.547-13.682]	0.40769	0.9249	0.90005	0.01417	0.2547	OpenSea	chr5:142815463
		Cognition	PACC	Cross-Sectional	cg12466613	303	5.3255	[-5.831-16.482]	0.35025	0.9249	0.91748	0.01192	0.24478	OpenSea	chr5:142815469
		Cognition	PACC	Cross-Sectional	cg21979215	303	0.4047	[-0.629-1.439]	0.44368	0.9249	0.76917	0.06877	0.39558	OpenSea	chr5:142815807
		Cognition	PACC	Cross-Sectional	cg11022710	303	-2.552	[-8.201-3.096]	0.37661	0.9249	0.90751	0.01966	0.20763	OpenSea	chr5:142820479
		Cognition	PACC	Longitudinal	cg23650353	272	0.1709	[-0.616-0.958]	0.67093	0.9096	0.92108	0.028	0.43394	OpenSea	chr4:148993643
		Cognition	PACC	Longitudinal	cg19491599	272	-0.1626	[-0.834-0.508]	0.63519	0.9096	0.84529	0.0161	0.20857	OpenSea	chr4:149000607
		Cognition	PACC	Longitudinal	cg10207656	272	-0.0585	[-0.914-0.797]	0.89356	0.9363	0.90855	0.01373	0.20071	OpenSea	chr4:149019526
		Cognition	PACC	Longitudinal	cg09143276	272	0.1044	[-0.342-0.551]	0.6472	0.9096	0.80845	0.02074	0.13091	OpenSea	chr4:149066518
		Cognition	PACC	Longitudinal	cg13000004	272	0.1221	[-0.744-0.988]	0.78256	0.923	0.86983	0.01161	0.09813	OpenSea	chr4:149074093
		Cognition	PACC	Longitudinal	cg10590842	272	-0.923	[-1.85-0.004]	0.05204	0.8874	0.9034	0.01143	0.10122	OpenSea	chr4:149083955
		Cognition	PACC	Longitudinal	cg21701890	272	-0.2832	[-0.719-0.153]	0.2045	0.9096	0.61622	0.02898	0.23369	OpenSea	chr4:149094632
		Cognition	PACC	Longitudinal	cg27234800	272	0.0265	[-0.129-0.182]	0.73922	0.9096	0.89127	0.0525	0.39493	OpenSea	chr4:149116611
		Cognition	PACC	Longitudinal	cg25672354	272	0.1346	[-0.419-0.688]	0.6341	0.9096	0.86697	0.01933	0.23574	OpenSea	chr4:149122383
		Cognition	PACC	Longitudinal	cg10993059	272	0.0218	[-0.864-0.908]	0.96162	0.9616	0.892	0.014	0.24786	OpenSea	chr4:149123062
		Cognition	PACC	Longitudinal	cg07335874	272	0.2793	[-0.629-1.188]	0.54717	0.9096	0.89734	0.01678	0.25463	OpenSea	chr4:149136507
		Cognition	PACC	Longitudinal	cg08264907	272	-0.4479	[-1.63-0.735]	0.45851	0.9096	0.90365	0.00834	0.08404	OpenSea	chr4:149144045
		Cognition	PACC	Longitudinal	cg07275757	272	0.2934	[-0.622-1.209]	0.53041	0.9096	0.89578	0.01331	0.13086	OpenSea	chr4:149189974
		Cognition	PACC	Longitudinal	cg13157799	272	0.1703	[-0.774-1.115]	0.72412	0.9096	0.05908	0.01227	0.14832	OpenSea	chr4:149191991
		Cognition	PACC	Longitudinal	cg00328411	272	-0.2573	[-1.461-0.947]	0.67566	0.9096	0.90656	0.00839	0.10838	OpenSea	chr4:149205617
		Cognition	PACC	Longitudinal	cg02471166	272	-0.1003	[-0.506-0.305]	0.62822	0.9096	0.62905	0.02431	0.28086	OpenSea	chr4:149244985
		Cognition	PACC	Longitudinal	cg27225476	272	0.0664	[-0.52-0.653]	0.82467	0.9363	0.85878	0.01502	0.11725	OpenSea	chr4:149275542
		Cognition	PACC	Longitudinal	cg06240648	272	0.3966	[-0.727-1.521]	0.48986	0.9096	0.90857	0.00875	0.08216	OpenSea	chr4:149289762
		Cognition	PACC	Longitudinal	cg04867484	272	0.2796	[-0.25-0.81]	0.30212	0.9096	0.06179	0.03171	0.6046	OpenSea	chr4:149297469
		Cognition	PACC	Longitudinal	cg19496136	272	-0.0395	[-0.285-0.206]	0.7529	0.9096	0.74636	0.06158	0.84904	OpenSea	chr4:149336765
		Cognition	PACC	Longitudinal	cg17253842	272	0.0492	[-0.593-0.691]	0.88067	0.9363	0.87057	0.02004	0.40157	OpenSea	chr4:149347991
		Cognition	PACC	Longitudinal	cg19650300	272	0.2624	[-0.512-1.037]	0.50751	0.9096	0.87161	0.0124	0.12937	OpenSea	chr4:149357960
		Cognition	PACC	Longitudinal	cg09238384	272	1.16	[0.338-1.982]	0.00609	0.56	0.88033	0.01059	0.10479	OpenSea	chr4:149358199
		Cognition	PACC	Longitudinal	cg07651033	272	0.1065	[-0.538-0.751]	0.74639	0.9096	0.891	0.01412	0.08448	OpenSea	chr4:149359043
		Cognition	PACC	Longitudinal	cg23329208	272	-0.1755	[-1.095-0.744]	0.70853	0.9096	0.89218	0.01003	0.08891	N_Shelf	chr4:149360981
		Cognition	PACC	Longitudinal	cg05437692	272	0.2434	[-0.083-0.569]	0.14454	0.9096	0.28837	0.04393	0.32226	N_Shore	chr4:149362435
		Cognition	PACC	Longitudinal	cg27460943	272	0.3091	[-0.239-0.858]	0.27031	0.9096	0.08292	0.02603	0.31306	N_Shore	chr4:149362809
		Cognition	PACC	Longitudinal	cg01576854	272	-0.2414	[-1.191-0.708]	0.61883	0.9096	0.07386	0.01207	0.20464	Island	chr4:149363450
		Cognition	PACC	Longitudinal	cg13996731	272	0.06	[-0.967-1.087]	0.90892	0.9363	0.05943	0.00984	0.12921	Island	chr4:149363522
		Cognition	PACC	Longitudinal	cg20140452	272	-0.0774	[-1.031-0.876]	0.87377	0.9363	0.07045	0.00971	0.0619	Island	chr4:149363715
		Cognition	PACC	Longitudinal	cg10621979	272	0.1944	[-0.786-1.175]	0.69802	0.9096	0.05355	0.018	0.29521	Island	chr4:149365824
		Cognition	PACC	Longitudinal	cg11239219	272	0.5104	[-0.391-1.412]	0.26824	0.9096	0.05479	0.02153	0.3658	Island	chr4:149365887
		Cognition	PACC	Longitudinal	cg10002915	272	0.0227	[-0.094-0.14]	0.70448	0.9096	0.54242	0.08455	0.73095	S_Shelf	chr4:149369175
		Cognition	PACC	Longitudinal	cg15374100	272	-0.1098	[-0.944-0.724]	0.79667	0.9278	0.86961	0.01354	0.2065	OpenSea	chr5:142651239
		Cognition	PACC	Longitudinal	cg15740681	272	0.8016	[-0.284-1.887]	0.14905	0.9096	0.89095	0.00925	0.09622	OpenSea	chr5:142653066
		Cognition	PACC	Longitudinal	cg26081259	272	0.8722	[-0.349-2.094]	0.16291	0.9096	0.92585	0.00714	0.05144	OpenSea	chr5:142659682
		Cognition	PACC	Longitudinal	cg13514002	272	-0.4095	[-1.285-0.466]	0.36004	0.9096	0.9104	0.01216	0.16497	OpenSea	chr5:142677292
		Cognition	PACC	Longitudinal	cg24801588	272	0.0474	[-0.803-0.898]	0.9132	0.9363	0.87613	0.01121	0.08119	OpenSea	chr5:142689858
		Cognition	PACC	Longitudinal	cg00407401	272	-0.4685	[-1.421-0.484]	0.33579	0.9096	0.88336	0.0113	0.12225	OpenSea	chr5:142690959
		Cognition	PACC	Longitudinal	cg19457823	272	-0.0421	[-0.241-0.157]	0.67958	0.9096	0.85324	0.04572	0.44993	OpenSea	chr5:142692961
		Cognition	PACC	Longitudinal	cg12741214	272	0.77	[-0.439-1.979]	0.21325	0.9096	0.92153	0.00739	0.05446	OpenSea	chr5:142695619
		Cognition	PACC	Longitudinal	cg04457787	272	0.5516	[-0.576-1.679]	0.33852	0.9096	0.91851	0.00864	0.10367	OpenSea	chr5:142695636
		Cognition	PACC	Longitudinal	cg20728768	272	0.2649	[-0.006-0.535]	0.05598	0.8874	0.28495	0.05593	0.42144	OpenSea	chr5:142696594
		Cognition	PACC	Longitudinal	cg25708981	272	-0.1597	[-0.427-0.107]	0.24237	0.9096	0.81142	0.04619	0.93615	OpenSea	chr5:142697868
		Cognition	PACC	Longitudinal	cg19645279	272	0.0593	[-0.255-0.374]	0.71205	0.9096	0.50627	0.03156	0.23017	OpenSea	chr5:142702733
		Cognition	PACC	Longitudinal	cg19176661	272	-0.2094	[-1.146-0.727]	0.66152	0.9096	0.90339	0.00908	0.09406	OpenSea	chr5:142718549
		Cognition	PACC	Longitudinal	cg07715663	272	0.081	[-1.141-1.303]	0.89672	0.9363	0.89993	0.0077	0.06068	OpenSea	chr5:142721796
		Cognition	PACC	Longitudinal	cg24052866	272	0.0919	[-0.18-0.363]	0.50747	0.9096	0.69336	0.03805	0.44354	OpenSea	chr5:142727470
		Cognition	PACC	Longitudinal	cg22233604	272	0.3124	[-0.17-0.795]	0.20567	0.9096	0.80239	0.02828	0.34628	OpenSea	chr5:142729377
		Cognition	PACC	Longitudinal	cg03857453	272	0.2381	[-0.046-0.522]	0.10125	0.8874	0.71757	0.04588	0.42058	OpenSea	chr5:142729913
		Cognition	PACC	Longitudinal	cg15115787	272	-0.0686	[-0.416-0.279]	0.69935	0.9096	0.2334	0.0467	0.33835	OpenSea	chr5:142730701
		Cognition	PACC	Longitudinal	cg12888360	272	0.0989	[-0.195-0.393]	0.51054	0.9096	0.19071	0.0335	0.21819	OpenSea	chr5:142732502
		Cognition	PACC	Longitudinal	cg18484679	272	-0.1358	[-0.803-0.531]	0.69009	0.9096	0.85401	0.0155	0.16305	OpenSea	chr5:142740314
		Cognition	PACC	Longitudinal	cg16586394	272	0.1454	[-0.792-1.082]	0.76132	0.9096	0.90913	0.01422	0.19939	OpenSea	chr5:142757011
		Cognition	PACC	Longitudinal	cg25535999	272	-0.1634	[-1.068-0.741]	0.72369	0.9096	0.89419	0.01191	0.0902	OpenSea	chr5:142757312
		Cognition	PACC	Longitudinal	cg03746860	272	0.4061	[-0.47-1.282]	0.36435	0.9096	0.89502	0.01114	0.14119	OpenSea	chr5:142759375
		Cognition	PACC	Longitudinal	cg20598211	272	0.2417	[-0.803-1.287]	0.65076	0.9096	0.91627	0.01158	0.20941	OpenSea	chr5:142762454
		Cognition	PACC	Longitudinal	cg05483455	272	0.7518	[-0.721-2.224]	0.3179	0.9096	0.92855	0.00637	0.07369	OpenSea	chr5:142762613
		Cognition	PACC	Longitudinal	cg16594263	272	-0.2642	[-1.603-1.075]	0.69931	0.9096	0.91923	0.01644	0.42455	OpenSea	chr5:142768048
		Cognition	PACC	Longitudinal	cg16535116	272	0.2287	[-0.261-0.719]	0.3611	0.9096	0.82395	0.0209	0.17773	OpenSea	chr5:142769612
		Cognition	PACC	Longitudinal	cg05900547	272	0.377	[-0.159-0.913]	0.16935	0.9096	0.82362	0.01868	0.15468	OpenSea	chr5:142769791
		Cognition	PACC	Longitudinal	cg19432243	272	0.1065	[-0.071-0.284]	0.24041	0.9096	0.75237	0.06043	0.89556	OpenSea	chr5:142770757
		Cognition	PACC	Longitudinal	cg19820298	272	0.058	[-0.115-0.231]	0.51204	0.9096	0.78285	0.05639	0.30689	OpenSea	chr5:142770782
		Cognition	PACC	Longitudinal	cg27107893	272	-0.0585	[-0.154-0.037]	0.22989	0.9096	0.79309	0.09578	0.9445	OpenSea	chr5:142776274
		Cognition	PACC	Longitudinal	cg17342132	272	0.1445	[-0.324-0.613]	0.5459	0.9096	0.86999	0.03297	0.31216	N_Shore	chr5:142780254
		Cognition	PACC	Longitudinal	cg07742588	272	0.0866	[-0.16-0.334]	0.49258	0.9096	0.78914	0.05595	0.91885	N_Shore	chr5:142780439
		Cognition	PACC	Longitudinal	cg00294552	272	-0.3551	[-0.763-0.053]	0.08911	0.8874	0.84207	0.02221	0.20462	N_Shore	chr5:142780486
		Cognition	PACC	Longitudinal	cg16219186	272	0.6077	[0.078-1.138]	0.02544	0.8874	0.88479	0.02148	0.22312	N_Shore	chr5:142780531
		Cognition	PACC	Longitudinal	cg08845721	272	-0.2505	[-0.785-0.284]	0.35928	0.9096	0.90291	0.02257	0.35006	N_Shore	chr5:142780693
		Cognition	PACC	Longitudinal	cg12969488	272	0.2147	[-0.07-0.5]	0.14108	0.9096	0.6959	0.03946	0.36342	N_Shore	chr5:142780984
		Cognition	PACC	Longitudinal	cg07733851	272	0.1561	[-0.007-0.319]	0.06155	0.8874	0.31012	0.05444	0.48866	N_Shore	chr5:142781498
		Cognition	PACC	Longitudinal	cg27122725	272	-0.1858	[-1.044-0.673]	0.67188	0.9096	0.08247	0.03649	0.61758	N_Shore	chr5:142781723
		Cognition	PACC	Longitudinal	cg06952416	272	0.103	[-0.504-0.71]	0.73973	0.9096	0.10317	0.01595	0.14679	N_Shore	chr5:142781736
		Cognition	PACC	Longitudinal	cg15910486	272	0.4238	[-0.368-1.216]	0.29531	0.9096	0.06987	0.01223	0.07877	Island	chr5:142783621
		Cognition	PACC	Longitudinal	cg01967637	272	-0.0373	[-0.73-0.655]	0.9159	0.9363	0.05849	0.01419	0.08687	Island	chr5:142784019
		Cognition	PACC	Longitudinal	cg26464411	272	0.1439	[-0.597-0.885]	0.7039	0.9096	0.0622	0.01192	0.08127	Island	chr5:142784222
		Cognition	PACC	Longitudinal	cg06968181	272	-0.5765	[-2.355-1.202]	0.52586	0.9096	0.05291	0.02403	0.66787	Island	chr5:142784323
		Cognition	PACC	Longitudinal	cg21702128	272	-0.3414	[-1.271-0.588]	0.4721	0.9096	0.08227	0.00965	0.07742	Island	chr5:142784721
		Cognition	PACC	Longitudinal	cg18718518	272	0.0198	[-0.186-0.226]	0.85082	0.9363	0.53255	0.05217	0.3892	S_Shore	chr5:142785455
		Cognition	PACC	Longitudinal	cg13764763	272	-0.154	[-0.328-0.02]	0.08442	0.8874	0.85356	0.05856	0.5219	S_Shore	chr5:142785501
		Cognition	PACC	Longitudinal	cg16224829	272	-0.193	[-0.491-0.105]	0.20542	0.9096	0.79156	0.03531	0.28375	OpenSea	chr5:142792698
		Cognition	PACC	Longitudinal	cg01751279	272	-0.0978	[-0.453-0.257]	0.58952	0.9096	0.83882	0.03986	0.35649	OpenSea	chr5:142793924
		Cognition	PACC	Longitudinal	cg23430507	272	-0.36	[-0.795-0.075]	0.1061	0.8874	0.67871	0.03655	0.31636	OpenSea	chr5:142798375
		Cognition	PACC	Longitudinal	cg17349736	272	0.4861	[-0.192-1.165]	0.16145	0.9096	0.8687	0.01502	0.1392	OpenSea	chr5:142802329
		Cognition	PACC	Longitudinal	cg14438279	272	0.0329	[-0.3-0.365]	0.84648	0.9363	0.80706	0.05892	0.46785	OpenSea	chr5:142806343
		Cognition	PACC	Longitudinal	cg08423118	272	-0.1468	[-0.284--0.009]	0.03747	0.8874	0.77492	0.07191	0.32112	OpenSea	chr5:142808610
		Cognition	PACC	Longitudinal	cg23776787	272	-0.8879	[-1.9-0.124]	0.08677	0.8874	0.05181	0.01906	0.42487	OpenSea	chr5:142814315
		Cognition	PACC	Longitudinal	cg03906910	272	-0.059	[-0.379-0.261]	0.71827	0.9096	0.22081	0.05239	0.37839	OpenSea	chr5:142814388
		Cognition	PACC	Longitudinal	cg07589972	272	-0.4248	[-1.642-0.792]	0.49442	0.9096	0.90005	0.01417	0.2547	OpenSea	chr5:142815463
		Cognition	PACC	Longitudinal	cg12466613	272	-0.0497	[-1.47-1.371]	0.94543	0.9558	0.91748	0.01192	0.24478	OpenSea	chr5:142815469
		Cognition	PACC	Longitudinal	cg21979215	272	-0.0567	[-0.192-0.078]	0.41159	0.9096	0.76917	0.06877	0.39558	OpenSea	chr5:142815807
		Cognition	PACC	Longitudinal	cg11022710	272	0.0779	[-0.661-0.817]	0.83646	0.9363	0.90751	0.01966	0.20763	OpenSea	chr5:142820479
		Cognition	Attention and Processing	Cross-Sectional	cg23650353	303	1.0259	[-6.084-8.135]	0.77751	0.967	0.92108	0.028	0.43394	OpenSea	chr4:148993643
		Cognition	Attention and Processing	Cross-Sectional	cg19491599	303	-0.6242	[-6.609-5.361]	0.83819	0.967	0.84529	0.0161	0.20857	OpenSea	chr4:149000607
		Cognition	Attention and Processing	Cross-Sectional	cg10207656	303	2.0456	[-5.535-9.627]	0.5973	0.9314	0.90855	0.01373	0.20071	OpenSea	chr4:149019526
		Cognition	Attention and Processing	Cross-Sectional	cg09143276	303	0.1647	[-3.884-4.213]	0.93651	0.967	0.80845	0.02074	0.13091	OpenSea	chr4:149066518
		Cognition	Attention and Processing	Cross-Sectional	cg13000004	303	1.0893	[-6.56-8.739]	0.78037	0.967	0.86983	0.01161	0.09813	OpenSea	chr4:149074093
		Cognition	Attention and Processing	Cross-Sectional	cg10590842	303	2.9788	[-5.365-11.323]	0.48466	0.8804	0.9034	0.01143	0.10122	OpenSea	chr4:149083955
		Cognition	Attention and Processing	Cross-Sectional	cg21701890	303	3.8738	[0.02-7.728]	0.0498	0.4582	0.61622	0.02898	0.23369	OpenSea	chr4:149094632
		Cognition	Attention and Processing	Cross-Sectional	cg27234800	303	0.3694	[-1.084-1.823]	0.61884	0.9489	0.89127	0.0525	0.39493	OpenSea	chr4:149116611
		Cognition	Attention and Processing	Cross-Sectional	cg25672354	303	-0.2357	[-5.245-4.774]	0.9266	0.967	0.86697	0.01933	0.23574	OpenSea	chr4:149122383
		Cognition	Attention and Processing	Cross-Sectional	cg10993059	303	2.8045	[-4.779-10.388]	0.46912	0.8804	0.892	0.014	0.24786	OpenSea	chr4:149123062
		Cognition	Attention and Processing	Cross-Sectional	cg07335874	303	3.1287	[-4.682-10.94]	0.43306	0.8804	0.89734	0.01678	0.25463	OpenSea	chr4:149136507
		Cognition	Attention and Processing	Cross-Sectional	cg08264907	303	-0.8941	[-11.523-9.735]	0.86916	0.967	0.90365	0.00834	0.08404	OpenSea	chr4:149144045
		Cognition	Attention and Processing	Cross-Sectional	cg07275757	303	-0.1063	[-8.102-7.89]	0.97922	0.9792	0.89578	0.01331	0.13086	OpenSea	chr4:149189974
		Cognition	Attention and Processing	Cross-Sectional	cg13157799	303	5.8138	[-2.327-13.955]	0.16269	0.5987	0.05908	0.01227	0.14832	OpenSea	chr4:149191991
		Cognition	Attention and Processing	Cross-Sectional	cg00328411	303	8.9052	[-1.836-19.646]	0.10526	0.5232	0.90656	0.00839	0.10838	OpenSea	chr4:149205617
		Cognition	Attention and Processing	Cross-Sectional	cg02471166	303	1.3537	[-2.238-4.946]	0.46071	0.8804	0.62905	0.02431	0.28086	OpenSea	chr4:149244985
		Cognition	Attention and Processing	Cross-Sectional	cg27225476	303	3.1211	[-2.088-8.33]	0.24123	0.6455	0.85878	0.01502	0.11725	OpenSea	chr4:149275542
		Cognition	Attention and Processing	Cross-Sectional	cg06240648	303	8.0908	[-1.905-18.086]	0.11373	0.5232	0.90857	0.00875	0.08216	OpenSea	chr4:149289762
		Cognition	Attention and Processing	Cross-Sectional	cg04867484	303	-4.2361	[-8.934-0.462]	0.07826	0.5143	0.06179	0.03171	0.6046	OpenSea	chr4:149297469
		Cognition	Attention and Processing	Cross-Sectional	cg19496136	303	1.0435	[-1.185-3.272]	0.35951	0.8269	0.74636	0.06158	0.84904	OpenSea	chr4:149336765
		Cognition	Attention and Processing	Cross-Sectional	cg17253842	303	2.0576	[-3.676-7.791]	0.48242	0.8804	0.87057	0.02004	0.40157	OpenSea	chr4:149347991
		Cognition	Attention and Processing	Cross-Sectional	cg19650300	303	2.3984	[-4.656-9.453]	0.50569	0.8804	0.87161	0.0124	0.12937	OpenSea	chr4:149357960
		Cognition	Attention and Processing	Cross-Sectional	cg09238384	303	5.8008	[-1.706-13.307]	0.13099	0.5478	0.88033	0.01059	0.10479	OpenSea	chr4:149358199
		Cognition	Attention and Processing	Cross-Sectional	cg07651033	303	1.3111	[-4.477-7.1]	0.65743	0.9527	0.891	0.01412	0.08448	OpenSea	chr4:149359043
		Cognition	Attention and Processing	Cross-Sectional	cg23329208	303	-3.3402	[-11.455-4.774]	0.42045	0.8791	0.89218	0.01003	0.08891	N_Shelf	chr4:149360981
		Cognition	Attention and Processing	Cross-Sectional	cg05437692	303	-2.5318	[-5.477-0.413]	0.09309	0.5232	0.28837	0.04393	0.32226	N_Shore	chr4:149362435
		Cognition	Attention and Processing	Cross-Sectional	cg27460943	303	-2.1553	[-6.991-2.68]	0.38307	0.8596	0.08292	0.02603	0.31306	N_Shore	chr4:149362809
		Cognition	Attention and Processing	Cross-Sectional	cg01576854	303	0.7902	[-7.84-9.42]	0.85771	0.967	0.07386	0.01207	0.20464	Island	chr4:149363450
		Cognition	Attention and Processing	Cross-Sectional	cg13996731	303	-5.9036	[-15.09-3.283]	0.20885	0.6355	0.05943	0.00984	0.12921	Island	chr4:149363522
		Cognition	Attention and Processing	Cross-Sectional	cg20140452	303	-1.007	[-9.566-7.552]	0.81777	0.967	0.07045	0.00971	0.0619	Island	chr4:149363715
		Cognition	Attention and Processing	Cross-Sectional	cg10621979	303	-2.8183	[-11.622-5.985]	0.53084	0.8804	0.05355	0.018	0.29521	Island	chr4:149365824
		Cognition	Attention and Processing	Cross-Sectional	cg11239219	303	-6.6254	[-14.724-1.473]	0.10995	0.5232	0.05479	0.02153	0.3658	Island	chr4:149365887
		Cognition	Attention and Processing	Cross-Sectional	cg10002915	303	-0.1537	[-1.201-0.893]	0.77379	0.967	0.54242	0.08455	0.73095	S_Shelf	chr4:149369175
		Cognition	Attention and Processing	Cross-Sectional	cg15374100	303	0.4776	[-6.676-7.631]	0.89597	0.967	0.86961	0.01354	0.2065	OpenSea	chr5:142651239
		Cognition	Attention and Processing	Cross-Sectional	cg15740681	303	-3.0555	[-12.719-6.608]	0.53591	0.8804	0.89095	0.00925	0.09622	OpenSea	chr5:142653066
		Cognition	Attention and Processing	Cross-Sectional	cg26081259	303	-12.7777	[-23.692--1.863]	0.02248	0.4137	0.92585	0.00714	0.05144	OpenSea	chr5:142659682
		Cognition	Attention and Processing	Cross-Sectional	cg13514002	303	8.2692	[0.47-16.068]	0.03859	0.4451	0.9104	0.01216	0.16497	OpenSea	chr5:142677292
		Cognition	Attention and Processing	Cross-Sectional	cg24801588	303	0.2434	[-7.373-7.86]	0.9501	0.967	0.87613	0.01121	0.08119	OpenSea	chr5:142689858
		Cognition	Attention and Processing	Cross-Sectional	cg00407401	303	7.1899	[-1.01-15.389]	0.08676	0.5232	0.88336	0.0113	0.12225	OpenSea	chr5:142690959
		Cognition	Attention and Processing	Cross-Sectional	cg19457823	303	-0.0861	[-1.946-1.773]	0.92774	0.967	0.85324	0.04572	0.44993	OpenSea	chr5:142692961
		Cognition	Attention and Processing	Cross-Sectional	cg12741214	303	-2.6004	[-13.446-8.245]	0.63875	0.9519	0.92153	0.00739	0.05446	OpenSea	chr5:142695619
		Cognition	Attention and Processing	Cross-Sectional	cg04457787	303	2.2202	[-7.747-12.187]	0.66274	0.9527	0.91851	0.00864	0.10367	OpenSea	chr5:142695636
		Cognition	Attention and Processing	Cross-Sectional	cg20728768	303	-0.4411	[-2.916-2.034]	0.72714	0.967	0.28495	0.05593	0.42144	OpenSea	chr5:142696594
		Cognition	Attention and Processing	Cross-Sectional	cg25708981	303	-0.3967	[-2.766-1.973]	0.74305	0.967	0.81142	0.04619	0.93615	OpenSea	chr5:142697868
		Cognition	Attention and Processing	Cross-Sectional	cg19645279	303	3.3068	[0.614-5.999]	0.01672	0.4137	0.50627	0.03156	0.23017	OpenSea	chr5:142702733
		Cognition	Attention and Processing	Cross-Sectional	cg19176661	303	1.6671	[-6.734-10.068]	0.69761	0.967	0.90339	0.00908	0.09406	OpenSea	chr5:142718549
		Cognition	Attention and Processing	Cross-Sectional	cg07715663	303	-1.765	[-12.662-9.132]	0.75113	0.967	0.89993	0.0077	0.06068	OpenSea	chr5:142721796
		Cognition	Attention and Processing	Cross-Sectional	cg24052866	303	-1.347	[-3.79-1.096]	0.28069	0.7173	0.69336	0.03805	0.44354	OpenSea	chr5:142727470
		Cognition	Attention and Processing	Cross-Sectional	cg22233604	303	-4.3647	[-8.584--0.145]	0.04355	0.4451	0.80239	0.02828	0.34628	OpenSea	chr5:142729377
		Cognition	Attention and Processing	Cross-Sectional	cg03857453	303	-3.0259	[-5.547--0.505]	0.01933	0.4137	0.71757	0.04588	0.42058	OpenSea	chr5:142729913
		Cognition	Attention and Processing	Cross-Sectional	cg15115787	303	0.8564	[-2.24-3.953]	0.58821	0.9314	0.2334	0.0467	0.33835	OpenSea	chr5:142730701
		Cognition	Attention and Processing	Cross-Sectional	cg12888360	303	-1.3029	[-3.956-1.35]	0.33663	0.7941	0.19071	0.0335	0.21819	OpenSea	chr5:142732502
		Cognition	Attention and Processing	Cross-Sectional	cg18484679	303	-3.4365	[-9.225-2.352]	0.24558	0.6455	0.85401	0.0155	0.16305	OpenSea	chr5:142740314
		Cognition	Attention and Processing	Cross-Sectional	cg16586394	303	6.0853	[-2.17-14.341]	0.14964	0.5736	0.90913	0.01422	0.19939	OpenSea	chr5:142757011
		Cognition	Attention and Processing	Cross-Sectional	cg25535999	303	2.5438	[-5.368-10.456]	0.5291	0.8804	0.89419	0.01191	0.0902	OpenSea	chr5:142757312
		Cognition	Attention and Processing	Cross-Sectional	cg03746860	303	-7.4698	[-15.32-0.381]	0.06321	0.4764	0.89502	0.01114	0.14119	OpenSea	chr5:142759375
		Cognition	Attention and Processing	Cross-Sectional	cg20598211	303	6.0159	[-3.201-15.232]	0.20182	0.6355	0.91627	0.01158	0.20941	OpenSea	chr5:142762454
		Cognition	Attention and Processing	Cross-Sectional	cg05483455	303	-6.3009	[-18.213-5.611]	0.30073	0.7369	0.92855	0.00637	0.07369	OpenSea	chr5:142762613
		Cognition	Attention and Processing	Cross-Sectional	cg16594263	303	-5.1715	[-17.229-6.886]	0.40125	0.8789	0.91923	0.01644	0.42455	OpenSea	chr5:142768048
		Cognition	Attention and Processing	Cross-Sectional	cg16535116	303	-4.756	[-9.106--0.406]	0.03298	0.4451	0.82395	0.0209	0.17773	OpenSea	chr5:142769612
		Cognition	Attention and Processing	Cross-Sectional	cg05900547	303	3.5849	[-1.194-8.364]	0.14263	0.5705	0.82362	0.01868	0.15468	OpenSea	chr5:142769791
		Cognition	Attention and Processing	Cross-Sectional	cg19432243	303	1.8806	[0.307-3.454]	0.01985	0.4137	0.75237	0.06043	0.89556	OpenSea	chr5:142770757
		Cognition	Attention and Processing	Cross-Sectional	cg19820298	303	-0.2007	[-1.736-1.335]	0.798	0.967	0.78285	0.05639	0.30689	OpenSea	chr5:142770782
		Cognition	Attention and Processing	Cross-Sectional	cg27107893	303	0.0615	[-0.778-0.901]	0.88582	0.967	0.79309	0.09578	0.9445	OpenSea	chr5:142776274
		Cognition	Attention and Processing	Cross-Sectional	cg17342132	303	-2.6647	[-6.886-1.557]	0.21703	0.6355	0.86999	0.03297	0.31216	N_Shore	chr5:142780254
		Cognition	Attention and Processing	Cross-Sectional	cg07742588	303	-0.7216	[-2.97-1.527]	0.52982	0.8804	0.78914	0.05595	0.91885	N_Shore	chr5:142780439
		Cognition	Attention and Processing	Cross-Sectional	cg00294552	303	3.9064	[0.2-7.613]	0.03975	0.4451	0.84207	0.02221	0.20462	N_Shore	chr5:142780486
		Cognition	Attention and Processing	Cross-Sectional	cg16219186	303	-2.5291	[-7.347-2.289]	0.30438	0.7369	0.88479	0.02148	0.22312	N_Shore	chr5:142780531
		Cognition	Attention and Processing	Cross-Sectional	cg08845721	303	0.286	[-4.477-5.049]	0.90639	0.967	0.90291	0.02257	0.35006	N_Shore	chr5:142780693
		Cognition	Attention and Processing	Cross-Sectional	cg12969488	303	-1.7715	[-4.326-0.783]	0.17515	0.6198	0.6959	0.03946	0.36342	N_Shore	chr5:142780984
		Cognition	Attention and Processing	Cross-Sectional	cg07733851	303	-1.1621	[-2.632-0.308]	0.12235	0.536	0.31012	0.05444	0.48866	N_Shore	chr5:142781498
		Cognition	Attention and Processing	Cross-Sectional	cg27122725	303	-4.7332	[-12.525-3.059]	0.2348	0.6455	0.08247	0.03649	0.61758	N_Shore	chr5:142781723
		Cognition	Attention and Processing	Cross-Sectional	cg06952416	303	-1.2911	[-6.72-4.138]	0.64151	0.9519	0.10317	0.01595	0.14679	N_Shore	chr5:142781736
		Cognition	Attention and Processing	Cross-Sectional	cg15910486	303	0.2723	[-6.885-7.429]	0.94061	0.967	0.06987	0.01223	0.07877	Island	chr5:142783621
		Cognition	Attention and Processing	Cross-Sectional	cg01967637	303	-5.8266	[-11.86-0.206]	0.05938	0.4764	0.05849	0.01419	0.08687	Island	chr5:142784019
		Cognition	Attention and Processing	Cross-Sectional	cg26464411	303	-2.1099	[-8.677-4.457]	0.52936	0.8804	0.0622	0.01192	0.08127	Island	chr5:142784222
		Cognition	Attention and Processing	Cross-Sectional	cg06968181	303	4.3677	[-11.352-20.088]	0.58648	0.9314	0.05291	0.02403	0.66787	Island	chr5:142784323
		Cognition	Attention and Processing	Cross-Sectional	cg21702128	303	-3.548	[-12.013-4.917]	0.41204	0.8791	0.08227	0.00965	0.07742	Island	chr5:142784721
		Cognition	Attention and Processing	Cross-Sectional	cg18718518	303	-1.1107	[-2.886-0.664]	0.22106	0.6355	0.53255	0.05217	0.3892	S_Shore	chr5:142785455
		Cognition	Attention and Processing	Cross-Sectional	cg13764763	303	-0.0575	[-1.588-1.473]	0.94139	0.967	0.85356	0.05856	0.5219	S_Shore	chr5:142785501
		Cognition	Attention and Processing	Cross-Sectional	cg16224829	303	0.073	[-2.547-2.693]	0.95648	0.967	0.79156	0.03531	0.28375	OpenSea	chr5:142792698
		Cognition	Attention and Processing	Cross-Sectional	cg01751279	303	2.9783	[-0.2-6.157]	0.06731	0.4764	0.83882	0.03986	0.35649	OpenSea	chr5:142793924
		Cognition	Attention and Processing	Cross-Sectional	cg23430507	303	3.1622	[-0.66-6.984]	0.106	0.5232	0.67871	0.03655	0.31636	OpenSea	chr5:142798375
		Cognition	Attention and Processing	Cross-Sectional	cg17349736	303	-1.0906	[-7.063-4.882]	0.72069	0.967	0.8687	0.01502	0.1392	OpenSea	chr5:142802329
		Cognition	Attention and Processing	Cross-Sectional	cg14438279	303	0.1921	[-2.744-3.128]	0.89808	0.967	0.80706	0.05892	0.46785	OpenSea	chr5:142806343
		Cognition	Attention and Processing	Cross-Sectional	cg08423118	303	-0.0462	[-1.29-1.198]	0.94207	0.967	0.77492	0.07191	0.32112	OpenSea	chr5:142808610
		Cognition	Attention and Processing	Cross-Sectional	cg23776787	303	-0.4679	[-9.357-8.421]	0.91791	0.967	0.05181	0.01906	0.42487	OpenSea	chr5:142814315
		Cognition	Attention and Processing	Cross-Sectional	cg03906910	303	-0.1831	[-2.911-2.545]	0.89543	0.967	0.22081	0.05239	0.37839	OpenSea	chr5:142814388
		Cognition	Attention and Processing	Cross-Sectional	cg07589972	303	6.9175	[-4.08-17.915]	0.21866	0.6355	0.90005	0.01417	0.2547	OpenSea	chr5:142815463
		Cognition	Attention and Processing	Cross-Sectional	cg12466613	303	15.3022	[2.627-27.977]	0.01864	0.4137	0.91748	0.01192	0.24478	OpenSea	chr5:142815469
		Cognition	Attention and Processing	Cross-Sectional	cg21979215	303	0.3829	[-0.802-1.568]	0.52698	0.8804	0.76917	0.06877	0.39558	OpenSea	chr5:142815807
		Cognition	Attention and Processing	Cross-Sectional	cg11022710	303	-4.2386	[-10.699-2.222]	0.19952	0.6355	0.90751	0.01966	0.20763	OpenSea	chr5:142820479
		Cognition	Attention and Processing	Longitudinal	cg23650353	272	0.08	[-0.26-0.42]	0.64473	0.9121	0.92108	0.028	0.43394	OpenSea	chr4:148993643
		Cognition	Attention and Processing	Longitudinal	cg19491599	272	0.0505	[-0.239-0.34]	0.73289	0.9121	0.84529	0.0161	0.20857	OpenSea	chr4:149000607
		Cognition	Attention and Processing	Longitudinal	cg10207656	272	-0.212	[-0.576-0.152]	0.25532	0.8457	0.90855	0.01373	0.20071	OpenSea	chr4:149019526
		Cognition	Attention and Processing	Longitudinal	cg09143276	272	0.0638	[-0.129-0.256]	0.51672	0.9121	0.80845	0.02074	0.13091	OpenSea	chr4:149066518
		Cognition	Attention and Processing	Longitudinal	cg13000004	272	0.0135	[-0.36-0.387]	0.94359	0.9547	0.86983	0.01161	0.09813	OpenSea	chr4:149074093
		Cognition	Attention and Processing	Longitudinal	cg10590842	272	-0.1315	[-0.534-0.271]	0.52256	0.9121	0.9034	0.01143	0.10122	OpenSea	chr4:149083955
		Cognition	Attention and Processing	Longitudinal	cg21701890	272	-0.0845	[-0.274-0.104]	0.38151	0.8658	0.61622	0.02898	0.23369	OpenSea	chr4:149094632
		Cognition	Attention and Processing	Longitudinal	cg27234800	272	-0.0501	[-0.117-0.017]	0.14397	0.8457	0.89127	0.0525	0.39493	OpenSea	chr4:149116611
		Cognition	Attention and Processing	Longitudinal	cg25672354	272	0.1082	[-0.131-0.347]	0.37526	0.8658	0.86697	0.01933	0.23574	OpenSea	chr4:149122383
		Cognition	Attention and Processing	Longitudinal	cg10993059	272	-0.0247	[-0.407-0.358]	0.8993	0.9464	0.892	0.014	0.24786	OpenSea	chr4:149123062
		Cognition	Attention and Processing	Longitudinal	cg07335874	272	-0.0569	[-0.45-0.336]	0.77688	0.9163	0.89734	0.01678	0.25463	OpenSea	chr4:149136507
		Cognition	Attention and Processing	Longitudinal	cg08264907	272	-0.2683	[-0.778-0.241]	0.30313	0.8457	0.90365	0.00834	0.08404	OpenSea	chr4:149144045
		Cognition	Attention and Processing	Longitudinal	cg07275757	272	0.3265	[-0.067-0.72]	0.10471	0.8457	0.89578	0.01331	0.13086	OpenSea	chr4:149189974
		Cognition	Attention and Processing	Longitudinal	cg13157799	272	0.2269	[-0.18-0.634]	0.27599	0.8457	0.05908	0.01227	0.14832	OpenSea	chr4:149191991
		Cognition	Attention and Processing	Longitudinal	cg00328411	272	-0.3112	[-0.829-0.206]	0.2398	0.8457	0.90656	0.00839	0.10838	OpenSea	chr4:149205617
		Cognition	Attention and Processing	Longitudinal	cg02471166	272	-0.0358	[-0.211-0.139]	0.68823	0.9121	0.62905	0.02431	0.28086	OpenSea	chr4:149244985
		Cognition	Attention and Processing	Longitudinal	cg27225476	272	-0.0559	[-0.309-0.198]	0.66602	0.9121	0.85878	0.01502	0.11725	OpenSea	chr4:149275542
		Cognition	Attention and Processing	Longitudinal	cg06240648	272	0.1839	[-0.303-0.67]	0.45947	0.9121	0.90857	0.00875	0.08216	OpenSea	chr4:149289762
		Cognition	Attention and Processing	Longitudinal	cg04867484	272	0.1031	[-0.125-0.331]	0.37626	0.8658	0.06179	0.03171	0.6046	OpenSea	chr4:149297469
		Cognition	Attention and Processing	Longitudinal	cg19496136	272	-0.0672	[-0.173-0.039]	0.21411	0.8457	0.74636	0.06158	0.84904	OpenSea	chr4:149336765
		Cognition	Attention and Processing	Longitudinal	cg17253842	272	-0.296	[-0.57--0.022]	0.03516	0.8457	0.87057	0.02004	0.40157	OpenSea	chr4:149347991
		Cognition	Attention and Processing	Longitudinal	cg19650300	272	0.0583	[-0.276-0.393]	0.73319	0.9121	0.87161	0.0124	0.12937	OpenSea	chr4:149357960
		Cognition	Attention and Processing	Longitudinal	cg09238384	272	0.3013	[-0.058-0.661]	0.10166	0.8457	0.88033	0.01059	0.10479	OpenSea	chr4:149358199
		Cognition	Attention and Processing	Longitudinal	cg07651033	272	0.0496	[-0.228-0.327]	0.72685	0.9121	0.891	0.01412	0.08448	OpenSea	chr4:149359043
		Cognition	Attention and Processing	Longitudinal	cg23329208	272	0.0405	[-0.358-0.439]	0.84208	0.9464	0.89218	0.01003	0.08891	N_Shelf	chr4:149360981
		Cognition	Attention and Processing	Longitudinal	cg05437692	272	0.1377	[-0.002-0.278]	0.0553	0.8457	0.28837	0.04393	0.32226	N_Shore	chr4:149362435
		Cognition	Attention and Processing	Longitudinal	cg27460943	272	0.1247	[-0.112-0.362]	0.30335	0.8457	0.08292	0.02603	0.31306	N_Shore	chr4:149362809
		Cognition	Attention and Processing	Longitudinal	cg01576854	272	-0.0021	[-0.411-0.407]	0.99184	0.9918	0.07386	0.01207	0.20464	Island	chr4:149363450
		Cognition	Attention and Processing	Longitudinal	cg13996731	272	0.0254	[-0.416-0.467]	0.91024	0.9464	0.05943	0.00984	0.12921	Island	chr4:149363522
		Cognition	Attention and Processing	Longitudinal	cg20140452	272	0.1991	[-0.211-0.609]	0.34204	0.8658	0.07045	0.00971	0.0619	Island	chr4:149363715
		Cognition	Attention and Processing	Longitudinal	cg10621979	272	-0.23	[-0.652-0.192]	0.28685	0.8457	0.05355	0.018	0.29521	Island	chr4:149365824
		Cognition	Attention and Processing	Longitudinal	cg11239219	272	0.0628	[-0.33-0.456]	0.75433	0.9121	0.05479	0.02153	0.3658	Island	chr4:149365887
		Cognition	Attention and Processing	Longitudinal	cg10002915	272	-0.0127	[-0.063-0.038]	0.62206	0.9121	0.54242	0.08455	0.73095	S_Shelf	chr4:149369175
		Cognition	Attention and Processing	Longitudinal	cg15374100	272	0.1069	[-0.253-0.467]	0.56138	0.9121	0.86961	0.01354	0.2065	OpenSea	chr5:142651239
		Cognition	Attention and Processing	Longitudinal	cg15740681	272	0.1827	[-0.289-0.655]	0.44862	0.9121	0.89095	0.00925	0.09622	OpenSea	chr5:142653066
		Cognition	Attention and Processing	Longitudinal	cg26081259	272	0.4251	[-0.107-0.957]	0.11856	0.8457	0.92585	0.00714	0.05144	OpenSea	chr5:142659682
		Cognition	Attention and Processing	Longitudinal	cg13514002	272	-0.0582	[-0.437-0.321]	0.76342	0.9121	0.9104	0.01216	0.16497	OpenSea	chr5:142677292
		Cognition	Attention and Processing	Longitudinal	cg24801588	272	-0.0622	[-0.43-0.306]	0.74075	0.9121	0.87613	0.01121	0.08119	OpenSea	chr5:142689858
		Cognition	Attention and Processing	Longitudinal	cg00407401	272	-0.1953	[-0.605-0.215]	0.35142	0.8658	0.88336	0.0113	0.12225	OpenSea	chr5:142690959
		Cognition	Attention and Processing	Longitudinal	cg19457823	272	0.0086	[-0.077-0.095]	0.84522	0.9464	0.85324	0.04572	0.44993	OpenSea	chr5:142692961
		Cognition	Attention and Processing	Longitudinal	cg12741214	272	0.5757	[0.058-1.094]	0.03023	0.8457	0.92153	0.00739	0.05446	OpenSea	chr5:142695619
		Cognition	Attention and Processing	Longitudinal	cg04457787	272	0.0348	[-0.447-0.517]	0.8877	0.9464	0.91851	0.00864	0.10367	OpenSea	chr5:142695636
		Cognition	Attention and Processing	Longitudinal	cg20728768	272	0.0694	[-0.048-0.187]	0.24706	0.8457	0.28495	0.05593	0.42144	OpenSea	chr5:142696594
		Cognition	Attention and Processing	Longitudinal	cg25708981	272	-0.0757	[-0.191-0.039]	0.19816	0.8457	0.81142	0.04619	0.93615	OpenSea	chr5:142697868
		Cognition	Attention and Processing	Longitudinal	cg19645279	272	0.0253	[-0.111-0.162]	0.71694	0.9121	0.50627	0.03156	0.23017	OpenSea	chr5:142702733
		Cognition	Attention and Processing	Longitudinal	cg19176661	272	0.1168	[-0.287-0.521]	0.57149	0.9121	0.90339	0.00908	0.09406	OpenSea	chr5:142718549
		Cognition	Attention and Processing	Longitudinal	cg07715663	272	-0.0536	[-0.581-0.474]	0.84223	0.9464	0.89993	0.0077	0.06068	OpenSea	chr5:142721796
		Cognition	Attention and Processing	Longitudinal	cg24052866	272	0.052	[-0.065-0.169]	0.38585	0.8658	0.69336	0.03805	0.44354	OpenSea	chr5:142727470
		Cognition	Attention and Processing	Longitudinal	cg22233604	272	0.07	[-0.139-0.279]	0.51157	0.9121	0.80239	0.02828	0.34628	OpenSea	chr5:142729377
		Cognition	Attention and Processing	Longitudinal	cg03857453	272	0.0667	[-0.057-0.19]	0.29035	0.8457	0.71757	0.04588	0.42058	OpenSea	chr5:142729913
		Cognition	Attention and Processing	Longitudinal	cg15115787	272	-0.0432	[-0.193-0.107]	0.57287	0.9121	0.2334	0.0467	0.33835	OpenSea	chr5:142730701
		Cognition	Attention and Processing	Longitudinal	cg12888360	272	0.0131	[-0.114-0.14]	0.84047	0.9464	0.19071	0.0335	0.21819	OpenSea	chr5:142732502
		Cognition	Attention and Processing	Longitudinal	cg18484679	272	-0.0241	[-0.312-0.264]	0.86961	0.9464	0.85401	0.0155	0.16305	OpenSea	chr5:142740314
		Cognition	Attention and Processing	Longitudinal	cg16586394	272	-0.2101	[-0.609-0.189]	0.30328	0.8457	0.90913	0.01422	0.19939	OpenSea	chr5:142757011
		Cognition	Attention and Processing	Longitudinal	cg25535999	272	-0.0935	[-0.484-0.297]	0.63946	0.9121	0.89419	0.01191	0.0902	OpenSea	chr5:142757312
		Cognition	Attention and Processing	Longitudinal	cg03746860	272	0.0782	[-0.301-0.458]	0.68653	0.9121	0.89502	0.01114	0.14119	OpenSea	chr5:142759375
		Cognition	Attention and Processing	Longitudinal	cg20598211	272	0.1275	[-0.324-0.579]	0.58004	0.9121	0.91627	0.01158	0.20941	OpenSea	chr5:142762454
		Cognition	Attention and Processing	Longitudinal	cg05483455	272	0.3932	[-0.241-1.027]	0.22556	0.8457	0.92855	0.00637	0.07369	OpenSea	chr5:142762613
		Cognition	Attention and Processing	Longitudinal	cg16594263	272	-0.2208	[-0.797-0.356]	0.45343	0.9121	0.91923	0.01644	0.42455	OpenSea	chr5:142768048
		Cognition	Attention and Processing	Longitudinal	cg16535116	272	0.2137	[0.003-0.425]	0.04817	0.8457	0.82395	0.0209	0.17773	OpenSea	chr5:142769612
		Cognition	Attention and Processing	Longitudinal	cg05900547	272	0.1824	[-0.049-0.414]	0.12435	0.8457	0.82362	0.01868	0.15468	OpenSea	chr5:142769791
		Cognition	Attention and Processing	Longitudinal	cg19432243	272	-0.0042	[-0.082-0.073]	0.91558	0.9464	0.75237	0.06043	0.89556	OpenSea	chr5:142770757
		Cognition	Attention and Processing	Longitudinal	cg19820298	272	-0.0055	[-0.08-0.069]	0.88493	0.9464	0.78285	0.05639	0.30689	OpenSea	chr5:142770782
		Cognition	Attention and Processing	Longitudinal	cg27107893	272	-0.0266	[-0.068-0.015]	0.20601	0.8457	0.79309	0.09578	0.9445	OpenSea	chr5:142776274
		Cognition	Attention and Processing	Longitudinal	cg17342132	272	0.169	[-0.032-0.37]	0.10066	0.8457	0.86999	0.03297	0.31216	N_Shore	chr5:142780254
		Cognition	Attention and Processing	Longitudinal	cg07742588	272	-0.0437	[-0.15-0.063]	0.42249	0.9121	0.78914	0.05595	0.91885	N_Shore	chr5:142780439
		Cognition	Attention and Processing	Longitudinal	cg00294552	272	-0.095	[-0.273-0.083]	0.29574	0.8457	0.84207	0.02221	0.20462	N_Shore	chr5:142780486
		Cognition	Attention and Processing	Longitudinal	cg16219186	272	0.105	[-0.125-0.335]	0.37247	0.8658	0.88479	0.02148	0.22312	N_Shore	chr5:142780531
		Cognition	Attention and Processing	Longitudinal	cg08845721	272	-0.1727	[-0.403-0.057]	0.14263	0.8457	0.90291	0.02257	0.35006	N_Shore	chr5:142780693
		Cognition	Attention and Processing	Longitudinal	cg12969488	272	0.0669	[-0.056-0.19]	0.28829	0.8457	0.6959	0.03946	0.36342	N_Shore	chr5:142780984
		Cognition	Attention and Processing	Longitudinal	cg07733851	272	0.0448	[-0.026-0.115]	0.21506	0.8457	0.31012	0.05444	0.48866	N_Shore	chr5:142781498
		Cognition	Attention and Processing	Longitudinal	cg27122725	272	0.0825	[-0.288-0.453]	0.66317	0.9121	0.08247	0.03649	0.61758	N_Shore	chr5:142781723
		Cognition	Attention and Processing	Longitudinal	cg06952416	272	0.0219	[-0.239-0.283]	0.86978	0.9464	0.10317	0.01595	0.14679	N_Shore	chr5:142781736
		Cognition	Attention and Processing	Longitudinal	cg15910486	272	0.0602	[-0.281-0.401]	0.72968	0.9121	0.06987	0.01223	0.07877	Island	chr5:142783621
		Cognition	Attention and Processing	Longitudinal	cg01967637	272	0.1606	[-0.138-0.46]	0.29357	0.8457	0.05849	0.01419	0.08687	Island	chr5:142784019
		Cognition	Attention and Processing	Longitudinal	cg26464411	272	0.0523	[-0.266-0.371]	0.74796	0.9121	0.0622	0.01192	0.08127	Island	chr5:142784222
		Cognition	Attention and Processing	Longitudinal	cg06968181	272	0.1685	[-0.6-0.937]	0.66762	0.9121	0.05291	0.02403	0.66787	Island	chr5:142784323
		Cognition	Attention and Processing	Longitudinal	cg21702128	272	-0.0725	[-0.474-0.329]	0.72373	0.9121	0.08227	0.00965	0.07742	Island	chr5:142784721
		Cognition	Attention and Processing	Longitudinal	cg18718518	272	-0.0308	[-0.12-0.058]	0.49707	0.9121	0.53255	0.05217	0.3892	S_Shore	chr5:142785455
		Cognition	Attention and Processing	Longitudinal	cg13764763	272	-0.0439	[-0.12-0.032]	0.25589	0.8457	0.85356	0.05856	0.5219	S_Shore	chr5:142785501
		Cognition	Attention and Processing	Longitudinal	cg16224829	272	-0.0573	[-0.186-0.071]	0.38315	0.8658	0.79156	0.03531	0.28375	OpenSea	chr5:142792698
		Cognition	Attention and Processing	Longitudinal	cg01751279	272	-0.0532	[-0.206-0.1]	0.49684	0.9121	0.83882	0.03986	0.35649	OpenSea	chr5:142793924
		Cognition	Attention and Processing	Longitudinal	cg23430507	272	-0.1437	[-0.332-0.044]	0.13568	0.8457	0.67871	0.03655	0.31636	OpenSea	chr5:142798375
		Cognition	Attention and Processing	Longitudinal	cg17349736	272	0.2196	[-0.073-0.513]	0.14314	0.8457	0.8687	0.01502	0.1392	OpenSea	chr5:142802329
		Cognition	Attention and Processing	Longitudinal	cg14438279	272	-0.1058	[-0.248-0.036]	0.14595	0.8457	0.80706	0.05892	0.46785	OpenSea	chr5:142806343
		Cognition	Attention and Processing	Longitudinal	cg08423118	272	-0.022	[-0.082-0.038]	0.4711	0.9121	0.77492	0.07191	0.32112	OpenSea	chr5:142808610
		Cognition	Attention and Processing	Longitudinal	cg23776787	272	0.1138	[-0.323-0.551]	0.6102	0.9121	0.05181	0.01906	0.42487	OpenSea	chr5:142814315
		Cognition	Attention and Processing	Longitudinal	cg03906910	272	-0.0049	[-0.143-0.133]	0.94437	0.9547	0.22081	0.05239	0.37839	OpenSea	chr5:142814388
		Cognition	Attention and Processing	Longitudinal	cg07589972	272	-0.4153	[-0.938-0.108]	0.12077	0.8457	0.90005	0.01417	0.2547	OpenSea	chr5:142815463
		Cognition	Attention and Processing	Longitudinal	cg12466613	272	-0.2151	[-0.831-0.401]	0.49451	0.9121	0.91748	0.01192	0.24478	OpenSea	chr5:142815469
		Cognition	Attention and Processing	Longitudinal	cg21979215	272	-0.0133	[-0.072-0.045]	0.65502	0.9121	0.76917	0.06877	0.39558	OpenSea	chr5:142815807
		Cognition	Attention and Processing	Longitudinal	cg11022710	272	0.0736	[-0.246-0.393]	0.65258	0.9121	0.90751	0.01966	0.20763	OpenSea	chr5:142820479
		Cognition	Episodic Recall	Cross-Sectional	cg23650353	303	3.418	[-4.028-10.864]	0.36901	0.9367	0.92108	0.028	0.43394	OpenSea	chr4:148993643
		Cognition	Episodic Recall	Cross-Sectional	cg19491599	303	-0.5638	[-6.84-5.712]	0.86035	0.9491	0.84529	0.0161	0.20857	OpenSea	chr4:149000607
		Cognition	Episodic Recall	Cross-Sectional	cg10207656	303	9.7793	[1.907-17.651]	0.01551	0.4756	0.90855	0.01373	0.20071	OpenSea	chr4:149019526
		Cognition	Episodic Recall	Cross-Sectional	cg09143276	303	-0.7448	[-4.989-3.5]	0.73115	0.9367	0.80845	0.02074	0.13091	OpenSea	chr4:149066518
		Cognition	Episodic Recall	Cross-Sectional	cg13000004	303	-1.3284	[-9.349-6.693]	0.74572	0.9367	0.86983	0.01161	0.09813	OpenSea	chr4:149074093
		Cognition	Episodic Recall	Cross-Sectional	cg10590842	303	-4.8985	[-13.637-3.84]	0.27283	0.9367	0.9034	0.01143	0.10122	OpenSea	chr4:149083955
		Cognition	Episodic Recall	Cross-Sectional	cg21701890	303	1.745	[-2.319-5.809]	0.40071	0.9367	0.61622	0.02898	0.23369	OpenSea	chr4:149094632
		Cognition	Episodic Recall	Cross-Sectional	cg27234800	303	-0.9559	[-2.477-0.565]	0.21901	0.9367	0.89127	0.0525	0.39493	OpenSea	chr4:149116611
		Cognition	Episodic Recall	Cross-Sectional	cg25672354	303	1.7659	[-3.484-7.015]	0.51021	0.9367	0.86697	0.01933	0.23574	OpenSea	chr4:149122383
		Cognition	Episodic Recall	Cross-Sectional	cg10993059	303	3.2163	[-4.734-11.167]	0.42849	0.9367	0.892	0.014	0.24786	OpenSea	chr4:149123062
		Cognition	Episodic Recall	Cross-Sectional	cg07335874	303	7.8477	[-0.301-15.997]	0.0601	0.7987	0.89734	0.01678	0.25463	OpenSea	chr4:149136507
		Cognition	Episodic Recall	Cross-Sectional	cg08264907	303	3.088	[-8.053-14.229]	0.58736	0.9367	0.90365	0.00834	0.08404	OpenSea	chr4:149144045
		Cognition	Episodic Recall	Cross-Sectional	cg07275757	303	-4.0273	[-12.399-4.344]	0.34653	0.9367	0.89578	0.01331	0.13086	OpenSea	chr4:149189974
		Cognition	Episodic Recall	Cross-Sectional	cg13157799	303	7.0305	[-1.497-15.558]	0.1072	0.9367	0.05908	0.01227	0.14832	OpenSea	chr4:149191991
		Cognition	Episodic Recall	Cross-Sectional	cg00328411	303	5.1908	[-6.108-16.49]	0.36866	0.9367	0.90656	0.00839	0.10838	OpenSea	chr4:149205617
		Cognition	Episodic Recall	Cross-Sectional	cg02471166	303	1.6433	[-2.122-5.409]	0.39305	0.9367	0.62905	0.02431	0.28086	OpenSea	chr4:149244985
		Cognition	Episodic Recall	Cross-Sectional	cg27225476	303	0.9516	[-4.523-6.426]	0.73358	0.9367	0.85878	0.01502	0.11725	OpenSea	chr4:149275542
		Cognition	Episodic Recall	Cross-Sectional	cg06240648	303	-2.4579	[-12.982-8.066]	0.64746	0.9367	0.90857	0.00875	0.08216	OpenSea	chr4:149289762
		Cognition	Episodic Recall	Cross-Sectional	cg04867484	303	-6.3139	[-11.213--1.415]	0.01207	0.4756	0.06179	0.03171	0.6046	OpenSea	chr4:149297469
		Cognition	Episodic Recall	Cross-Sectional	cg19496136	303	1.7075	[-0.624-4.039]	0.15232	0.9367	0.74636	0.06158	0.84904	OpenSea	chr4:149336765
		Cognition	Episodic Recall	Cross-Sectional	cg17253842	303	3.1743	[-2.832-9.181]	0.30118	0.9367	0.87057	0.02004	0.40157	OpenSea	chr4:149347991
		Cognition	Episodic Recall	Cross-Sectional	cg19650300	303	-2.769	[-10.165-4.627]	0.46366	0.9367	0.87161	0.0124	0.12937	OpenSea	chr4:149357960
		Cognition	Episodic Recall	Cross-Sectional	cg09238384	303	-1.9288	[-9.829-5.971]	0.63263	0.9367	0.88033	0.01059	0.10479	OpenSea	chr4:149358199
		Cognition	Episodic Recall	Cross-Sectional	cg07651033	303	-1.6151	[-7.684-4.454]	0.60236	0.9367	0.891	0.01412	0.08448	OpenSea	chr4:149359043
		Cognition	Episodic Recall	Cross-Sectional	cg23329208	303	-3.8248	[-12.332-4.682]	0.37894	0.9367	0.89218	0.01003	0.08891	N_Shelf	chr4:149360981
		Cognition	Episodic Recall	Cross-Sectional	cg05437692	303	-0.4332	[-3.536-2.67]	0.7846	0.9367	0.28837	0.04393	0.32226	N_Shore	chr4:149362435
		Cognition	Episodic Recall	Cross-Sectional	cg27460943	303	0.9441	[-4.132-6.02]	0.71572	0.9367	0.08292	0.02603	0.31306	N_Shore	chr4:149362809
		Cognition	Episodic Recall	Cross-Sectional	cg01576854	303	4.3517	[-4.684-13.388]	0.34601	0.9367	0.07386	0.01207	0.20464	Island	chr4:149363450
		Cognition	Episodic Recall	Cross-Sectional	cg13996731	303	-1.7338	[-11.392-7.924]	0.7252	0.9367	0.05943	0.00984	0.12921	Island	chr4:149363522
		Cognition	Episodic Recall	Cross-Sectional	cg20140452	303	-1.907	[-10.88-7.066]	0.67732	0.9367	0.07045	0.00971	0.0619	Island	chr4:149363715
		Cognition	Episodic Recall	Cross-Sectional	cg10621979	303	0.3698	[-8.868-9.607]	0.93752	0.9779	0.05355	0.018	0.29521	Island	chr4:149365824
		Cognition	Episodic Recall	Cross-Sectional	cg11239219	303	2.492	[-6.034-11.018]	0.56717	0.9367	0.05479	0.02153	0.3658	Island	chr4:149365887
		Cognition	Episodic Recall	Cross-Sectional	cg10002915	303	-0.7605	[-1.855-0.334]	0.1744	0.9367	0.54242	0.08455	0.73095	S_Shelf	chr4:149369175
		Cognition	Episodic Recall	Cross-Sectional	cg15374100	303	-0.0427	[-7.544-7.459]	0.9911	0.9911	0.86961	0.01354	0.2065	OpenSea	chr5:142651239
		Cognition	Episodic Recall	Cross-Sectional	cg15740681	303	-2.869	[-13.003-7.265]	0.57942	0.9367	0.89095	0.00925	0.09622	OpenSea	chr5:142653066
		Cognition	Episodic Recall	Cross-Sectional	cg26081259	303	0.3429	[-11.207-11.893]	0.95364	0.9779	0.92585	0.00714	0.05144	OpenSea	chr5:142659682
		Cognition	Episodic Recall	Cross-Sectional	cg13514002	303	0.3737	[-7.866-8.613]	0.92923	0.9779	0.9104	0.01216	0.16497	OpenSea	chr5:142677292
		Cognition	Episodic Recall	Cross-Sectional	cg24801588	303	-3.5781	[-11.554-4.398]	0.38001	0.9367	0.87613	0.01121	0.08119	OpenSea	chr5:142689858
		Cognition	Episodic Recall	Cross-Sectional	cg00407401	303	5.2529	[-3.368-13.874]	0.23337	0.9367	0.88336	0.0113	0.12225	OpenSea	chr5:142690959
		Cognition	Episodic Recall	Cross-Sectional	cg19457823	303	0.2828	[-1.667-2.232]	0.77634	0.9367	0.85324	0.04572	0.44993	OpenSea	chr5:142692961
		Cognition	Episodic Recall	Cross-Sectional	cg12741214	303	2.1289	[-9.245-13.503]	0.71401	0.9367	0.92153	0.00739	0.05446	OpenSea	chr5:142695619
		Cognition	Episodic Recall	Cross-Sectional	cg04457787	303	8.0426	[-2.371-18.456]	0.13119	0.9367	0.91851	0.00864	0.10367	OpenSea	chr5:142695636
		Cognition	Episodic Recall	Cross-Sectional	cg20728768	303	0.3627	[-2.233-2.958]	0.78439	0.9367	0.28495	0.05593	0.42144	OpenSea	chr5:142696594
		Cognition	Episodic Recall	Cross-Sectional	cg25708981	303	0.8411	[-1.642-3.324]	0.50727	0.9367	0.81142	0.04619	0.93615	OpenSea	chr5:142697868
		Cognition	Episodic Recall	Cross-Sectional	cg19645279	303	1.1654	[-1.683-4.014]	0.42334	0.9367	0.50627	0.03156	0.23017	OpenSea	chr5:142702733
		Cognition	Episodic Recall	Cross-Sectional	cg19176661	303	-0.0994	[-8.911-8.713]	0.98238	0.9911	0.90339	0.00908	0.09406	OpenSea	chr5:142718549
		Cognition	Episodic Recall	Cross-Sectional	cg07715663	303	-0.3175	[-11.747-11.112]	0.95662	0.9779	0.89993	0.0077	0.06068	OpenSea	chr5:142721796
		Cognition	Episodic Recall	Cross-Sectional	cg24052866	303	-1.6493	[-4.209-0.91]	0.20763	0.9367	0.69336	0.03805	0.44354	OpenSea	chr5:142727470
		Cognition	Episodic Recall	Cross-Sectional	cg22233604	303	-0.5938	[-5.05-3.862]	0.79414	0.9367	0.80239	0.02828	0.34628	OpenSea	chr5:142729377
		Cognition	Episodic Recall	Cross-Sectional	cg03857453	303	-1.3437	[-4.008-1.321]	0.32384	0.9367	0.71757	0.04588	0.42058	OpenSea	chr5:142729913
		Cognition	Episodic Recall	Cross-Sectional	cg15115787	303	1.7932	[-1.449-5.036]	0.2793	0.9367	0.2334	0.0467	0.33835	OpenSea	chr5:142730701
		Cognition	Episodic Recall	Cross-Sectional	cg12888360	303	1.8504	[-0.928-4.629]	0.19282	0.9367	0.19071	0.0335	0.21819	OpenSea	chr5:142732502
		Cognition	Episodic Recall	Cross-Sectional	cg18484679	303	-2.8797	[-8.955-3.196]	0.35365	0.9367	0.85401	0.0155	0.16305	OpenSea	chr5:142740314
		Cognition	Episodic Recall	Cross-Sectional	cg16586394	303	9.4226	[0.803-18.042]	0.03299	0.7589	0.90913	0.01422	0.19939	OpenSea	chr5:142757011
		Cognition	Episodic Recall	Cross-Sectional	cg25535999	303	2.9405	[-5.355-11.236]	0.48777	0.9367	0.89419	0.01191	0.0902	OpenSea	chr5:142757312
		Cognition	Episodic Recall	Cross-Sectional	cg03746860	303	-6.4824	[-14.73-1.765]	0.12456	0.9367	0.89502	0.01114	0.14119	OpenSea	chr5:142759375
		Cognition	Episodic Recall	Cross-Sectional	cg20598211	303	-1.1494	[-10.841-8.542]	0.81636	0.9487	0.91627	0.01158	0.20941	OpenSea	chr5:142762454
		Cognition	Episodic Recall	Cross-Sectional	cg05483455	303	1.0735	[-11.441-13.588]	0.86659	0.9491	0.92855	0.00637	0.07369	OpenSea	chr5:142762613
		Cognition	Episodic Recall	Cross-Sectional	cg16594263	303	-1.6917	[-14.35-10.966]	0.79355	0.9367	0.91923	0.01644	0.42455	OpenSea	chr5:142768048
		Cognition	Episodic Recall	Cross-Sectional	cg16535116	303	0.4883	[-4.11-5.087]	0.83525	0.9487	0.82395	0.0209	0.17773	OpenSea	chr5:142769612
		Cognition	Episodic Recall	Cross-Sectional	cg05900547	303	-0.8423	[-5.872-4.187]	0.74297	0.9367	0.82362	0.01868	0.15468	OpenSea	chr5:142769791
		Cognition	Episodic Recall	Cross-Sectional	cg19432243	303	0.4278	[-1.237-2.093]	0.61502	0.9367	0.75237	0.06043	0.89556	OpenSea	chr5:142770757
		Cognition	Episodic Recall	Cross-Sectional	cg19820298	303	0.2167	[-1.393-1.827]	0.79214	0.9367	0.78285	0.05639	0.30689	OpenSea	chr5:142770782
		Cognition	Episodic Recall	Cross-Sectional	cg27107893	303	-0.3394	[-1.219-0.54]	0.44982	0.9367	0.79309	0.09578	0.9445	OpenSea	chr5:142776274
		Cognition	Episodic Recall	Cross-Sectional	cg17342132	303	-2.7398	[-7.167-1.687]	0.22615	0.9367	0.86999	0.03297	0.31216	N_Shore	chr5:142780254
		Cognition	Episodic Recall	Cross-Sectional	cg07742588	303	-2.9186	[-5.253--0.584]	0.01488	0.4756	0.78914	0.05595	0.91885	N_Shore	chr5:142780439
		Cognition	Episodic Recall	Cross-Sectional	cg00294552	303	1.2796	[-2.633-5.192]	0.52203	0.9367	0.84207	0.02221	0.20462	N_Shore	chr5:142780486
		Cognition	Episodic Recall	Cross-Sectional	cg16219186	303	-1.425	[-6.484-3.634]	0.5813	0.9367	0.88479	0.02148	0.22312	N_Shore	chr5:142780531
		Cognition	Episodic Recall	Cross-Sectional	cg08845721	303	0.7593	[-4.235-5.753]	0.76592	0.9367	0.90291	0.02257	0.35006	N_Shore	chr5:142780693
		Cognition	Episodic Recall	Cross-Sectional	cg12969488	303	-1.5436	[-4.225-1.138]	0.26013	0.9367	0.6959	0.03946	0.36342	N_Shore	chr5:142780984
		Cognition	Episodic Recall	Cross-Sectional	cg07733851	303	0.3761	[-1.171-1.923]	0.63412	0.9367	0.31012	0.05444	0.48866	N_Shore	chr5:142781498
		Cognition	Episodic Recall	Cross-Sectional	cg27122725	303	-2.4158	[-10.602-5.77]	0.56345	0.9367	0.08247	0.03649	0.61758	N_Shore	chr5:142781723
		Cognition	Episodic Recall	Cross-Sectional	cg06952416	303	-1.7893	[-7.481-3.902]	0.53828	0.9367	0.10317	0.01595	0.14679	N_Shore	chr5:142781736
		Cognition	Episodic Recall	Cross-Sectional	cg15910486	303	5.7303	[-1.745-13.206]	0.1341	0.9367	0.06987	0.01223	0.07877	Island	chr5:142783621
		Cognition	Episodic Recall	Cross-Sectional	cg01967637	303	0.4316	[-5.934-6.797]	0.89437	0.968	0.05849	0.01419	0.08687	Island	chr5:142784019
		Cognition	Episodic Recall	Cross-Sectional	cg26464411	303	-3.1237	[-10.005-3.758]	0.37436	0.9367	0.0622	0.01192	0.08127	Island	chr5:142784222
		Cognition	Episodic Recall	Cross-Sectional	cg06968181	303	3.2036	[-13.285-19.693]	0.70363	0.9367	0.05291	0.02403	0.66787	Island	chr5:142784323
		Cognition	Episodic Recall	Cross-Sectional	cg21702128	303	3.0808	[-5.799-11.961]	0.49706	0.9367	0.08227	0.00965	0.07742	Island	chr5:142784721
		Cognition	Episodic Recall	Cross-Sectional	cg18718518	303	-1.6536	[-3.51-0.203]	0.08193	0.9367	0.53255	0.05217	0.3892	S_Shore	chr5:142785455
		Cognition	Episodic Recall	Cross-Sectional	cg13764763	303	0.0796	[-1.525-1.684]	0.92264	0.9779	0.85356	0.05856	0.5219	S_Shore	chr5:142785501
		Cognition	Episodic Recall	Cross-Sectional	cg16224829	303	2.6228	[-0.108-5.354]	0.06077	0.7987	0.79156	0.03531	0.28375	OpenSea	chr5:142792698
		Cognition	Episodic Recall	Cross-Sectional	cg01751279	303	2.2492	[-1.093-5.592]	0.18825	0.9367	0.83882	0.03986	0.35649	OpenSea	chr5:142793924
		Cognition	Episodic Recall	Cross-Sectional	cg23430507	303	0.9056	[-3.119-4.931]	0.65957	0.9367	0.67871	0.03655	0.31636	OpenSea	chr5:142798375
		Cognition	Episodic Recall	Cross-Sectional	cg17349736	303	1.5698	[-4.692-7.832]	0.62354	0.9367	0.8687	0.01502	0.1392	OpenSea	chr5:142802329
		Cognition	Episodic Recall	Cross-Sectional	cg14438279	303	2.9522	[-0.108-6.012]	0.05965	0.7987	0.80706	0.05892	0.46785	OpenSea	chr5:142806343
		Cognition	Episodic Recall	Cross-Sectional	cg08423118	303	-0.1279	[-1.432-1.177]	0.84775	0.9491	0.77492	0.07191	0.32112	OpenSea	chr5:142808610
		Cognition	Episodic Recall	Cross-Sectional	cg23776787	303	1.0282	[-8.292-10.349]	0.82897	0.9487	0.05181	0.01906	0.42487	OpenSea	chr5:142814315
		Cognition	Episodic Recall	Cross-Sectional	cg03906910	303	0.6196	[-2.24-3.48]	0.67142	0.9367	0.22081	0.05239	0.37839	OpenSea	chr5:142814388
		Cognition	Episodic Recall	Cross-Sectional	cg07589972	303	4.4195	[-7.132-15.971]	0.45396	0.9367	0.90005	0.01417	0.2547	OpenSea	chr5:142815463
		Cognition	Episodic Recall	Cross-Sectional	cg12466613	303	8.0022	[-5.387-21.391]	0.24241	0.9367	0.91748	0.01192	0.24478	OpenSea	chr5:142815469
		Cognition	Episodic Recall	Cross-Sectional	cg21979215	303	0.6888	[-0.552-1.929]	0.2775	0.9367	0.76917	0.06877	0.39558	OpenSea	chr5:142815807
		Cognition	Episodic Recall	Cross-Sectional	cg11022710	303	-2.7827	[-9.569-4.004]	0.42226	0.9367	0.90751	0.01966	0.20763	OpenSea	chr5:142820479
		Cognition	Episodic Recall	Longitudinal	cg23650353	272	-0.0736	[-0.739-0.592]	0.82856	0.99	0.92108	0.028	0.43394	OpenSea	chr4:148993643
		Cognition	Episodic Recall	Longitudinal	cg19491599	272	-0.3114	[-0.875-0.253]	0.28021	0.99	0.84529	0.0161	0.20857	OpenSea	chr4:149000607
		Cognition	Episodic Recall	Longitudinal	cg10207656	272	-0.2447	[-0.964-0.475]	0.50586	0.99	0.90855	0.01373	0.20071	OpenSea	chr4:149019526
		Cognition	Episodic Recall	Longitudinal	cg09143276	272	-0.0193	[-0.395-0.356]	0.91992	0.9948	0.80845	0.02074	0.13091	OpenSea	chr4:149066518
		Cognition	Episodic Recall	Longitudinal	cg13000004	272	-0.1081	[-0.837-0.621]	0.7715	0.99	0.86983	0.01161	0.09813	OpenSea	chr4:149074093
		Cognition	Episodic Recall	Longitudinal	cg10590842	272	-0.6577	[-1.44-0.125]	0.10066	0.9261	0.9034	0.01143	0.10122	OpenSea	chr4:149083955
		Cognition	Episodic Recall	Longitudinal	cg21701890	272	-0.1535	[-0.521-0.214]	0.41391	0.99	0.61622	0.02898	0.23369	OpenSea	chr4:149094632
		Cognition	Episodic Recall	Longitudinal	cg27234800	272	0.0566	[-0.075-0.188]	0.39852	0.99	0.89127	0.0525	0.39493	OpenSea	chr4:149116611
		Cognition	Episodic Recall	Longitudinal	cg25672354	272	0.1036	[-0.363-0.571]	0.66385	0.99	0.86697	0.01933	0.23574	OpenSea	chr4:149122383
		Cognition	Episodic Recall	Longitudinal	cg10993059	272	0.0465	[-0.699-0.792]	0.9028	0.9929	0.892	0.014	0.24786	OpenSea	chr4:149123062
		Cognition	Episodic Recall	Longitudinal	cg07335874	272	0.2222	[-0.544-0.988]	0.57024	0.99	0.89734	0.01678	0.25463	OpenSea	chr4:149136507
		Cognition	Episodic Recall	Longitudinal	cg08264907	272	-0.2131	[-1.211-0.785]	0.67583	0.99	0.90365	0.00834	0.08404	OpenSea	chr4:149144045
		Cognition	Episodic Recall	Longitudinal	cg07275757	272	0.4936	[-0.276-1.263]	0.20986	0.99	0.89578	0.01331	0.13086	OpenSea	chr4:149189974
		Cognition	Episodic Recall	Longitudinal	cg13157799	272	-0.3518	[-1.146-0.442]	0.38597	0.99	0.05908	0.01227	0.14832	OpenSea	chr4:149191991
		Cognition	Episodic Recall	Longitudinal	cg00328411	272	-0.5039	[-1.513-0.505]	0.32841	0.99	0.90656	0.00839	0.10838	OpenSea	chr4:149205617
		Cognition	Episodic Recall	Longitudinal	cg02471166	272	-0.1826	[-0.524-0.159]	0.29534	0.99	0.62905	0.02431	0.28086	OpenSea	chr4:149244985
		Cognition	Episodic Recall	Longitudinal	cg27225476	272	-0.0306	[-0.525-0.464]	0.9036	0.9929	0.85878	0.01502	0.11725	OpenSea	chr4:149275542
		Cognition	Episodic Recall	Longitudinal	cg06240648	272	-0.0031	[-0.95-0.944]	0.99486	0.9949	0.90857	0.00875	0.08216	OpenSea	chr4:149289762
		Cognition	Episodic Recall	Longitudinal	cg04867484	272	0.1885	[-0.258-0.635]	0.40834	0.99	0.06179	0.03171	0.6046	OpenSea	chr4:149297469
		Cognition	Episodic Recall	Longitudinal	cg19496136	272	-0.0185	[-0.226-0.189]	0.86114	0.9929	0.74636	0.06158	0.84904	OpenSea	chr4:149336765
		Cognition	Episodic Recall	Longitudinal	cg17253842	272	-0.152	[-0.693-0.39]	0.58275	0.99	0.87057	0.02004	0.40157	OpenSea	chr4:149347991
		Cognition	Episodic Recall	Longitudinal	cg19650300	272	0.1811	[-0.472-0.834]	0.58705	0.99	0.87161	0.0124	0.12937	OpenSea	chr4:149357960
		Cognition	Episodic Recall	Longitudinal	cg09238384	272	0.7549	[0.059-1.451]	0.0345	0.7934	0.88033	0.01059	0.10479	OpenSea	chr4:149358199
		Cognition	Episodic Recall	Longitudinal	cg07651033	272	0.233	[-0.309-0.775]	0.40015	0.99	0.891	0.01412	0.08448	OpenSea	chr4:149359043
		Cognition	Episodic Recall	Longitudinal	cg23329208	272	0.0951	[-0.679-0.869]	0.80994	0.99	0.89218	0.01003	0.08891	N_Shelf	chr4:149360981
		Cognition	Episodic Recall	Longitudinal	cg05437692	272	0.0948	[-0.18-0.369]	0.49953	0.99	0.28837	0.04393	0.32226	N_Shore	chr4:149362435
		Cognition	Episodic Recall	Longitudinal	cg27460943	272	0.0161	[-0.448-0.481]	0.94579	0.9948	0.08292	0.02603	0.31306	N_Shore	chr4:149362809
		Cognition	Episodic Recall	Longitudinal	cg01576854	272	-0.1412	[-0.94-0.657]	0.72927	0.99	0.07386	0.01207	0.20464	Island	chr4:149363450
		Cognition	Episodic Recall	Longitudinal	cg13996731	272	-0.1859	[-1.05-0.678]	0.67363	0.99	0.05943	0.00984	0.12921	Island	chr4:149363522
		Cognition	Episodic Recall	Longitudinal	cg20140452	272	-0.1589	[-0.962-0.644]	0.69827	0.99	0.07045	0.00971	0.0619	Island	chr4:149363715
		Cognition	Episodic Recall	Longitudinal	cg10621979	272	-0.0979	[-0.924-0.728]	0.81633	0.99	0.05355	0.018	0.29521	Island	chr4:149365824
		Cognition	Episodic Recall	Longitudinal	cg11239219	272	0.0866	[-0.676-0.849]	0.82409	0.99	0.05479	0.02153	0.3658	Island	chr4:149365887
		Cognition	Episodic Recall	Longitudinal	cg10002915	272	0.0133	[-0.085-0.112]	0.7914	0.99	0.54242	0.08455	0.73095	S_Shelf	chr4:149369175
		Cognition	Episodic Recall	Longitudinal	cg15374100	272	-0.2707	[-0.972-0.431]	0.45013	0.99	0.86961	0.01354	0.2065	OpenSea	chr5:142651239
		Cognition	Episodic Recall	Longitudinal	cg15740681	272	0.6225	[-0.292-1.537]	0.18343	0.99	0.89095	0.00925	0.09622	OpenSea	chr5:142653066
		Cognition	Episodic Recall	Longitudinal	cg26081259	272	0.9821	[-0.046-2.01]	0.06233	0.9261	0.92585	0.00714	0.05144	OpenSea	chr5:142659682
		Cognition	Episodic Recall	Longitudinal	cg13514002	272	-0.0076	[-0.744-0.729]	0.98396	0.9948	0.9104	0.01216	0.16497	OpenSea	chr5:142677292
		Cognition	Episodic Recall	Longitudinal	cg24801588	272	0.2579	[-0.458-0.973]	0.48066	0.99	0.87613	0.01121	0.08119	OpenSea	chr5:142689858
		Cognition	Episodic Recall	Longitudinal	cg00407401	272	-0.3755	[-1.175-0.424]	0.35812	0.99	0.88336	0.0113	0.12225	OpenSea	chr5:142690959
		Cognition	Episodic Recall	Longitudinal	cg19457823	272	-0.0018	[-0.17-0.166]	0.983	0.9948	0.85324	0.04572	0.44993	OpenSea	chr5:142692961
		Cognition	Episodic Recall	Longitudinal	cg12741214	272	0.3855	[-0.634-1.405]	0.45914	0.99	0.92153	0.00739	0.05446	OpenSea	chr5:142695619
		Cognition	Episodic Recall	Longitudinal	cg04457787	272	0.2224	[-0.729-1.174]	0.64723	0.99	0.91851	0.00864	0.10367	OpenSea	chr5:142695636
		Cognition	Episodic Recall	Longitudinal	cg20728768	272	0.1005	[-0.129-0.33]	0.39073	0.99	0.28495	0.05593	0.42144	OpenSea	chr5:142696594
		Cognition	Episodic Recall	Longitudinal	cg25708981	272	-0.1565	[-0.381-0.068]	0.17315	0.99	0.81142	0.04619	0.93615	OpenSea	chr5:142697868
		Cognition	Episodic Recall	Longitudinal	cg19645279	272	0.1202	[-0.144-0.384]	0.37363	0.99	0.50627	0.03156	0.23017	OpenSea	chr5:142702733
		Cognition	Episodic Recall	Longitudinal	cg19176661	272	-0.0473	[-0.837-0.742]	0.90656	0.9929	0.90339	0.00908	0.09406	OpenSea	chr5:142718549
		Cognition	Episodic Recall	Longitudinal	cg07715663	272	-0.1559	[-1.185-0.873]	0.76676	0.99	0.89993	0.0077	0.06068	OpenSea	chr5:142721796
		Cognition	Episodic Recall	Longitudinal	cg24052866	272	0.0704	[-0.158-0.299]	0.54721	0.99	0.69336	0.03805	0.44354	OpenSea	chr5:142727470
		Cognition	Episodic Recall	Longitudinal	cg22233604	272	0.1736	[-0.233-0.58]	0.40303	0.99	0.80239	0.02828	0.34628	OpenSea	chr5:142729377
		Cognition	Episodic Recall	Longitudinal	cg03857453	272	0.2031	[-0.036-0.442]	0.09653	0.9261	0.71757	0.04588	0.42058	OpenSea	chr5:142729913
		Cognition	Episodic Recall	Longitudinal	cg15115787	272	-0.0185	[-0.311-0.274]	0.90155	0.9929	0.2334	0.0467	0.33835	OpenSea	chr5:142730701
		Cognition	Episodic Recall	Longitudinal	cg12888360	272	0.0839	[-0.164-0.332]	0.50764	0.99	0.19071	0.0335	0.21819	OpenSea	chr5:142732502
		Cognition	Episodic Recall	Longitudinal	cg18484679	272	-0.2581	[-0.82-0.303]	0.36853	0.99	0.85401	0.0155	0.16305	OpenSea	chr5:142740314
		Cognition	Episodic Recall	Longitudinal	cg16586394	272	-0.1613	[-0.952-0.629]	0.68944	0.99	0.90913	0.01422	0.19939	OpenSea	chr5:142757011
		Cognition	Episodic Recall	Longitudinal	cg25535999	272	-0.2246	[-0.986-0.537]	0.56385	0.99	0.89419	0.01191	0.0902	OpenSea	chr5:142757312
		Cognition	Episodic Recall	Longitudinal	cg03746860	272	0.4069	[-0.33-1.144]	0.28023	0.99	0.89502	0.01114	0.14119	OpenSea	chr5:142759375
		Cognition	Episodic Recall	Longitudinal	cg20598211	272	-0.0162	[-0.896-0.864]	0.97126	0.9948	0.91627	0.01158	0.20941	OpenSea	chr5:142762454
		Cognition	Episodic Recall	Longitudinal	cg05483455	272	0.1594	[-1.082-1.401]	0.80149	0.99	0.92855	0.00637	0.07369	OpenSea	chr5:142762613
		Cognition	Episodic Recall	Longitudinal	cg16594263	272	-0.4891	[-1.613-0.634]	0.39438	0.99	0.91923	0.01644	0.42455	OpenSea	chr5:142768048
		Cognition	Episodic Recall	Longitudinal	cg16535116	272	0.0977	[-0.315-0.511]	0.64335	0.99	0.82395	0.0209	0.17773	OpenSea	chr5:142769612
		Cognition	Episodic Recall	Longitudinal	cg05900547	272	0.1954	[-0.257-0.647]	0.39763	0.99	0.82362	0.01868	0.15468	OpenSea	chr5:142769791
		Cognition	Episodic Recall	Longitudinal	cg19432243	272	0.054	[-0.096-0.204]	0.47969	0.99	0.75237	0.06043	0.89556	OpenSea	chr5:142770757
		Cognition	Episodic Recall	Longitudinal	cg19820298	272	0.0173	[-0.129-0.163]	0.81615	0.99	0.78285	0.05639	0.30689	OpenSea	chr5:142770782
		Cognition	Episodic Recall	Longitudinal	cg27107893	272	-0.0099	[-0.091-0.071]	0.81085	0.99	0.79309	0.09578	0.9445	OpenSea	chr5:142776274
		Cognition	Episodic Recall	Longitudinal	cg17342132	272	-0.0777	[-0.472-0.317]	0.6997	0.99	0.86999	0.03297	0.31216	N_Shore	chr5:142780254
		Cognition	Episodic Recall	Longitudinal	cg07742588	272	0.0581	[-0.151-0.267]	0.5859	0.99	0.78914	0.05595	0.91885	N_Shore	chr5:142780439
		Cognition	Episodic Recall	Longitudinal	cg00294552	272	-0.3124	[-0.655-0.031]	0.07556	0.9261	0.84207	0.02221	0.20462	N_Shore	chr5:142780486
		Cognition	Episodic Recall	Longitudinal	cg16219186	272	0.3759	[-0.071-0.823]	0.10061	0.9261	0.88479	0.02148	0.22312	N_Shore	chr5:142780531
		Cognition	Episodic Recall	Longitudinal	cg08845721	272	-0.1416	[-0.592-0.309]	0.53848	0.99	0.90291	0.02257	0.35006	N_Shore	chr5:142780693
		Cognition	Episodic Recall	Longitudinal	cg12969488	272	0.0094	[-0.231-0.25]	0.93869	0.9948	0.6959	0.03946	0.36342	N_Shore	chr5:142780984
		Cognition	Episodic Recall	Longitudinal	cg07733851	272	0.0279	[-0.11-0.166]	0.69167	0.99	0.31012	0.05444	0.48866	N_Shore	chr5:142781498
		Cognition	Episodic Recall	Longitudinal	cg27122725	272	-0.3313	[-1.054-0.392]	0.36984	0.99	0.08247	0.03649	0.61758	N_Shore	chr5:142781723
		Cognition	Episodic Recall	Longitudinal	cg06952416	272	-0.0137	[-0.525-0.498]	0.95819	0.9948	0.10317	0.01595	0.14679	N_Shore	chr5:142781736
		Cognition	Episodic Recall	Longitudinal	cg15910486	272	0.2382	[-0.431-0.908]	0.48601	0.99	0.06987	0.01223	0.07877	Island	chr5:142783621
		Cognition	Episodic Recall	Longitudinal	cg01967637	272	-0.2009	[-0.782-0.381]	0.49907	0.99	0.05849	0.01419	0.08687	Island	chr5:142784019
		Cognition	Episodic Recall	Longitudinal	cg26464411	272	-0.2176	[-0.841-0.406]	0.49477	0.99	0.0622	0.01192	0.08127	Island	chr5:142784222
		Cognition	Episodic Recall	Longitudinal	cg06968181	272	-0.7131	[-2.21-0.783]	0.35123	0.99	0.05291	0.02403	0.66787	Island	chr5:142784323
		Cognition	Episodic Recall	Longitudinal	cg21702128	272	-0.3639	[-1.146-0.418]	0.36246	0.99	0.08227	0.00965	0.07742	Island	chr5:142784721
		Cognition	Episodic Recall	Longitudinal	cg18718518	272	0.0398	[-0.134-0.213]	0.65387	0.99	0.53255	0.05217	0.3892	S_Shore	chr5:142785455
		Cognition	Episodic Recall	Longitudinal	cg13764763	272	-0.1188	[-0.266-0.028]	0.11399	0.9534	0.85356	0.05856	0.5219	S_Shore	chr5:142785501
		Cognition	Episodic Recall	Longitudinal	cg16224829	272	-0.3274	[-0.577--0.078]	0.01058	0.7934	0.79156	0.03531	0.28375	OpenSea	chr5:142792698
		Cognition	Episodic Recall	Longitudinal	cg01751279	272	-0.0898	[-0.389-0.209]	0.5566	0.99	0.83882	0.03986	0.35649	OpenSea	chr5:142793924
		Cognition	Episodic Recall	Longitudinal	cg23430507	272	-0.4155	[-0.78--0.051]	0.02638	0.7934	0.67871	0.03655	0.31636	OpenSea	chr5:142798375
		Cognition	Episodic Recall	Longitudinal	cg17349736	272	-0.0793	[-0.653-0.494]	0.78641	0.99	0.8687	0.01502	0.1392	OpenSea	chr5:142802329
		Cognition	Episodic Recall	Longitudinal	cg14438279	272	-0.0186	[-0.299-0.261]	0.89625	0.9929	0.80706	0.05892	0.46785	OpenSea	chr5:142806343
		Cognition	Episodic Recall	Longitudinal	cg08423118	272	-0.1139	[-0.23-0.002]	0.05521	0.9261	0.77492	0.07191	0.32112	OpenSea	chr5:142808610
		Cognition	Episodic Recall	Longitudinal	cg23776787	272	-0.983	[-1.831--0.135]	0.02385	0.7934	0.05181	0.01906	0.42487	OpenSea	chr5:142814315
		Cognition	Episodic Recall	Longitudinal	cg03906910	272	-0.21	[-0.479-0.059]	0.1266	0.9706	0.22081	0.05239	0.37839	OpenSea	chr5:142814388
		Cognition	Episodic Recall	Longitudinal	cg07589972	272	-0.6219	[-1.645-0.401]	0.23446	0.99	0.90005	0.01417	0.2547	OpenSea	chr5:142815463
		Cognition	Episodic Recall	Longitudinal	cg12466613	272	-0.142	[-1.334-1.05]	0.81564	0.99	0.91748	0.01192	0.24478	OpenSea	chr5:142815469
		Cognition	Episodic Recall	Longitudinal	cg21979215	272	-0.043	[-0.157-0.071]	0.45926	0.99	0.76917	0.06877	0.39558	OpenSea	chr5:142815807
		Cognition	Episodic Recall	Longitudinal	cg11022710	272	0.0409	[-0.582-0.664]	0.89781	0.9929	0.90751	0.01966	0.20763	OpenSea	chr5:142820479
		Cognition	Executive Function	Cross-Sectional	cg23650353	303	1.3433	[-5.44-8.126]	0.69818	0.9953	0.92108	0.028	0.43394	OpenSea	chr4:148993643
		Cognition	Executive Function	Cross-Sectional	cg19491599	303	1.1532	[-4.556-6.863]	0.69249	0.9953	0.84529	0.0161	0.20857	OpenSea	chr4:149000607
		Cognition	Executive Function	Cross-Sectional	cg10207656	303	-2.1676	[-9.4-5.065]	0.5574	0.9953	0.90855	0.01373	0.20071	OpenSea	chr4:149019526
		Cognition	Executive Function	Cross-Sectional	cg09143276	303	0.0794	[-3.784-3.942]	0.96791	0.9953	0.80845	0.02074	0.13091	OpenSea	chr4:149066518
		Cognition	Executive Function	Cross-Sectional	cg13000004	303	3.5844	[-3.704-10.872]	0.33587	0.9656	0.86983	0.01161	0.09813	OpenSea	chr4:149074093
		Cognition	Executive Function	Cross-Sectional	cg10590842	303	-0.2102	[-8.178-7.758]	0.9588	0.9953	0.9034	0.01143	0.10122	OpenSea	chr4:149083955
		Cognition	Executive Function	Cross-Sectional	cg21701890	303	0.9257	[-2.775-4.627]	0.6243	0.9953	0.61622	0.02898	0.23369	OpenSea	chr4:149094632
		Cognition	Executive Function	Cross-Sectional	cg27234800	303	1.2024	[-0.178-2.583]	0.0889	0.9656	0.89127	0.0525	0.39493	OpenSea	chr4:149116611
		Cognition	Executive Function	Cross-Sectional	cg25672354	303	0.7295	[-4.05-5.509]	0.76505	0.9953	0.86697	0.01933	0.23574	OpenSea	chr4:149122383
		Cognition	Executive Function	Cross-Sectional	cg10993059	303	2.5478	[-4.688-9.784]	0.49069	0.9953	0.892	0.014	0.24786	OpenSea	chr4:149123062
		Cognition	Executive Function	Cross-Sectional	cg07335874	303	-4.3648	[-11.809-3.079]	0.2514	0.9656	0.89734	0.01678	0.25463	OpenSea	chr4:149136507
		Cognition	Executive Function	Cross-Sectional	cg08264907	303	-5.8077	[-15.928-4.312]	0.26161	0.9656	0.90365	0.00834	0.08404	OpenSea	chr4:149144045
		Cognition	Executive Function	Cross-Sectional	cg07275757	303	-0.8819	[-8.51-6.747]	0.82091	0.9953	0.89578	0.01331	0.13086	OpenSea	chr4:149189974
		Cognition	Executive Function	Cross-Sectional	cg13157799	303	-1.5752	[-9.367-6.217]	0.69226	0.9953	0.05908	0.01227	0.14832	OpenSea	chr4:149191991
		Cognition	Executive Function	Cross-Sectional	cg00328411	303	2.0827	[-8.21-12.376]	0.69196	0.9953	0.90656	0.00839	0.10838	OpenSea	chr4:149205617
		Cognition	Executive Function	Cross-Sectional	cg02471166	303	3.5488	[0.143-6.955]	0.04204	0.9656	0.62905	0.02431	0.28086	OpenSea	chr4:149244985
		Cognition	Executive Function	Cross-Sectional	cg27225476	303	0.4476	[-4.534-5.43]	0.86033	0.9953	0.85878	0.01502	0.11725	OpenSea	chr4:149275542
		Cognition	Executive Function	Cross-Sectional	cg06240648	303	0.9562	[-8.622-10.535]	0.84502	0.9953	0.90857	0.00875	0.08216	OpenSea	chr4:149289762
		Cognition	Executive Function	Cross-Sectional	cg04867484	303	-3.0509	[-7.544-1.442]	0.18432	0.9656	0.06179	0.03171	0.6046	OpenSea	chr4:149297469
		Cognition	Executive Function	Cross-Sectional	cg19496136	303	-0.0075	[-2.137-2.122]	0.99453	0.9988	0.74636	0.06158	0.84904	OpenSea	chr4:149336765
		Cognition	Executive Function	Cross-Sectional	cg17253842	303	-1.3262	[-6.8-4.147]	0.63524	0.9953	0.87057	0.02004	0.40157	OpenSea	chr4:149347991
		Cognition	Executive Function	Cross-Sectional	cg19650300	303	-1.3333	[-8.068-5.401]	0.69826	0.9953	0.87161	0.0124	0.12937	OpenSea	chr4:149357960
		Cognition	Executive Function	Cross-Sectional	cg09238384	303	1.68	[-5.509-8.869]	0.64726	0.9953	0.88033	0.01059	0.10479	OpenSea	chr4:149358199
		Cognition	Executive Function	Cross-Sectional	cg07651033	303	3.9897	[-1.516-9.495]	0.15661	0.9656	0.891	0.01412	0.08448	OpenSea	chr4:149359043
		Cognition	Executive Function	Cross-Sectional	cg23329208	303	-3.5941	[-11.334-4.146]	0.36352	0.9836	0.89218	0.01003	0.08891	N_Shelf	chr4:149360981
		Cognition	Executive Function	Cross-Sectional	cg05437692	303	-1.5099	[-4.328-1.309]	0.29464	0.9656	0.28837	0.04393	0.32226	N_Shore	chr4:149362435
		Cognition	Executive Function	Cross-Sectional	cg27460943	303	1.5253	[-3.091-6.142]	0.51778	0.9953	0.08292	0.02603	0.31306	N_Shore	chr4:149362809
		Cognition	Executive Function	Cross-Sectional	cg01576854	303	3.9277	[-4.294-12.15]	0.34992	0.9755	0.07386	0.01207	0.20464	Island	chr4:149363450
		Cognition	Executive Function	Cross-Sectional	cg13996731	303	0.6593	[-8.13-9.449]	0.88321	0.9953	0.05943	0.00984	0.12921	Island	chr4:149363522
		Cognition	Executive Function	Cross-Sectional	cg20140452	303	-1.5177	[-9.683-6.647]	0.7159	0.9953	0.07045	0.00971	0.0619	Island	chr4:149363715
		Cognition	Executive Function	Cross-Sectional	cg10621979	303	4.2738	[-4.117-12.665]	0.31897	0.9656	0.05355	0.018	0.29521	Island	chr4:149365824
		Cognition	Executive Function	Cross-Sectional	cg11239219	303	-3.8927	[-11.642-3.856]	0.32565	0.9656	0.05479	0.02153	0.3658	Island	chr4:149365887
		Cognition	Executive Function	Cross-Sectional	cg10002915	303	-0.3397	[-1.338-0.659]	0.50547	0.9953	0.54242	0.08455	0.73095	S_Shelf	chr4:149369175
		Cognition	Executive Function	Cross-Sectional	cg15374100	303	-1.5063	[-8.33-5.317]	0.66557	0.9953	0.86961	0.01354	0.2065	OpenSea	chr5:142651239
		Cognition	Executive Function	Cross-Sectional	cg15740681	303	-0.2833	[-9.509-8.943]	0.95205	0.9953	0.89095	0.00925	0.09622	OpenSea	chr5:142653066
		Cognition	Executive Function	Cross-Sectional	cg26081259	303	-9.2729	[-19.727-1.182]	0.08321	0.9656	0.92585	0.00714	0.05144	OpenSea	chr5:142659682
		Cognition	Executive Function	Cross-Sectional	cg13514002	303	-2.3053	[-9.798-5.187]	0.54696	0.9953	0.9104	0.01216	0.16497	OpenSea	chr5:142677292
		Cognition	Executive Function	Cross-Sectional	cg24801588	303	3.6693	[-3.586-10.924]	0.32239	0.9656	0.87613	0.01121	0.08119	OpenSea	chr5:142689858
		Cognition	Executive Function	Cross-Sectional	cg00407401	303	-1.8294	[-9.691-6.032]	0.64865	0.9953	0.88336	0.0113	0.12225	OpenSea	chr5:142690959
		Cognition	Executive Function	Cross-Sectional	cg19457823	303	-0.9964	[-2.767-0.774]	0.27094	0.9656	0.85324	0.04572	0.44993	OpenSea	chr5:142692961
		Cognition	Executive Function	Cross-Sectional	cg12741214	303	4.1269	[-6.214-14.468]	0.43475	0.9953	0.92153	0.00739	0.05446	OpenSea	chr5:142695619
		Cognition	Executive Function	Cross-Sectional	cg04457787	303	9.406	[-0.044-18.856]	0.05206	0.9656	0.91851	0.00864	0.10367	OpenSea	chr5:142695636
		Cognition	Executive Function	Cross-Sectional	cg20728768	303	-0.5358	[-2.897-1.826]	0.65688	0.9953	0.28495	0.05593	0.42144	OpenSea	chr5:142696594
		Cognition	Executive Function	Cross-Sectional	cg25708981	303	-0.0526	[-2.314-2.209]	0.96368	0.9953	0.81142	0.04619	0.93615	OpenSea	chr5:142697868
		Cognition	Executive Function	Cross-Sectional	cg19645279	303	0.3309	[-2.264-2.926]	0.80282	0.9953	0.50627	0.03156	0.23017	OpenSea	chr5:142702733
		Cognition	Executive Function	Cross-Sectional	cg19176661	303	1.5711	[-6.445-9.587]	0.70116	0.9953	0.90339	0.00908	0.09406	OpenSea	chr5:142718549
		Cognition	Executive Function	Cross-Sectional	cg07715663	303	-0.4791	[-10.879-9.92]	0.92812	0.9953	0.89993	0.0077	0.06068	OpenSea	chr5:142721796
		Cognition	Executive Function	Cross-Sectional	cg24052866	303	-1.3546	[-3.685-0.976]	0.25548	0.9656	0.69336	0.03805	0.44354	OpenSea	chr5:142727470
		Cognition	Executive Function	Cross-Sectional	cg22233604	303	-2.7858	[-6.828-1.256]	0.17782	0.9656	0.80239	0.02828	0.34628	OpenSea	chr5:142729377
		Cognition	Executive Function	Cross-Sectional	cg03857453	303	-2.6905	[-5.099--0.282]	0.02939	0.9656	0.71757	0.04588	0.42058	OpenSea	chr5:142729913
		Cognition	Executive Function	Cross-Sectional	cg15115787	303	1.2105	[-1.743-4.164]	0.4224	0.9953	0.2334	0.0467	0.33835	OpenSea	chr5:142730701
		Cognition	Executive Function	Cross-Sectional	cg12888360	303	-0.574	[-3.109-1.961]	0.65752	0.9953	0.19071	0.0335	0.21819	OpenSea	chr5:142732502
		Cognition	Executive Function	Cross-Sectional	cg18484679	303	-1.1246	[-6.659-4.41]	0.69076	0.9953	0.85401	0.0155	0.16305	OpenSea	chr5:142740314
		Cognition	Executive Function	Cross-Sectional	cg16586394	303	1.0138	[-6.891-8.919]	0.80172	0.9953	0.90913	0.01422	0.19939	OpenSea	chr5:142757011
		Cognition	Executive Function	Cross-Sectional	cg25535999	303	-0.4005	[-7.955-7.154]	0.91732	0.9953	0.89419	0.01191	0.0902	OpenSea	chr5:142757312
		Cognition	Executive Function	Cross-Sectional	cg03746860	303	0.1273	[-7.409-7.663]	0.97362	0.9953	0.89502	0.01114	0.14119	OpenSea	chr5:142759375
		Cognition	Executive Function	Cross-Sectional	cg20598211	303	3.5232	[-5.287-12.333]	0.43379	0.9953	0.91627	0.01158	0.20941	OpenSea	chr5:142762454
		Cognition	Executive Function	Cross-Sectional	cg05483455	303	1.607	[-9.779-12.993]	0.78226	0.9953	0.92855	0.00637	0.07369	OpenSea	chr5:142762613
		Cognition	Executive Function	Cross-Sectional	cg16594263	303	0.8201	[-10.698-12.339]	0.88911	0.9953	0.91923	0.01644	0.42455	OpenSea	chr5:142768048
		Cognition	Executive Function	Cross-Sectional	cg16535116	303	-1.1354	[-5.318-3.047]	0.59506	0.9953	0.82395	0.0209	0.17773	OpenSea	chr5:142769612
		Cognition	Executive Function	Cross-Sectional	cg05900547	303	-0.4537	[-5.031-4.123]	0.84609	0.9953	0.82362	0.01868	0.15468	OpenSea	chr5:142769791
		Cognition	Executive Function	Cross-Sectional	cg19432243	303	0.7785	[-0.735-2.292]	0.31414	0.9656	0.75237	0.06043	0.89556	OpenSea	chr5:142770757
		Cognition	Executive Function	Cross-Sectional	cg19820298	303	-0.8714	[-2.333-0.59]	0.2436	0.9656	0.78285	0.05639	0.30689	OpenSea	chr5:142770782
		Cognition	Executive Function	Cross-Sectional	cg27107893	303	-0.1893	[-0.99-0.611]	0.64341	0.9953	0.79309	0.09578	0.9445	OpenSea	chr5:142776274
		Cognition	Executive Function	Cross-Sectional	cg17342132	303	-0.5487	[-4.587-3.49]	0.79018	0.9953	0.86999	0.03297	0.31216	N_Shore	chr5:142780254
		Cognition	Executive Function	Cross-Sectional	cg07742588	303	-2.9625	[-5.082--0.844]	0.00653	0.6005	0.78914	0.05595	0.91885	N_Shore	chr5:142780439
		Cognition	Executive Function	Cross-Sectional	cg00294552	303	0.666	[-2.896-4.228]	0.71428	0.9953	0.84207	0.02221	0.20462	N_Shore	chr5:142780486
		Cognition	Executive Function	Cross-Sectional	cg16219186	303	-1.1843	[-5.788-3.419]	0.61446	0.9953	0.88479	0.02148	0.22312	N_Shore	chr5:142780531
		Cognition	Executive Function	Cross-Sectional	cg08845721	303	-1.5494	[-6.091-2.992]	0.50424	0.9953	0.90291	0.02257	0.35006	N_Shore	chr5:142780693
		Cognition	Executive Function	Cross-Sectional	cg12969488	303	-1.8434	[-4.279-0.592]	0.1391	0.9656	0.6959	0.03946	0.36342	N_Shore	chr5:142780984
		Cognition	Executive Function	Cross-Sectional	cg07733851	303	-0.5772	[-1.984-0.83]	0.42192	0.9953	0.31012	0.05444	0.48866	N_Shore	chr5:142781498
		Cognition	Executive Function	Cross-Sectional	cg27122725	303	-1.6835	[-9.134-5.767]	0.65818	0.9953	0.08247	0.03649	0.61758	N_Shore	chr5:142781723
		Cognition	Executive Function	Cross-Sectional	cg06952416	303	-3.1719	[-8.341-1.997]	0.23009	0.9656	0.10317	0.01595	0.14679	N_Shore	chr5:142781736
		Cognition	Executive Function	Cross-Sectional	cg15910486	303	4.1455	[-2.666-10.957]	0.23395	0.9656	0.06987	0.01223	0.07877	Island	chr5:142783621
		Cognition	Executive Function	Cross-Sectional	cg01967637	303	0.1759	[-5.617-5.968]	0.95257	0.9953	0.05849	0.01419	0.08687	Island	chr5:142784019
		Cognition	Executive Function	Cross-Sectional	cg26464411	303	-4.2545	[-10.505-1.996]	0.18323	0.9656	0.0622	0.01192	0.08127	Island	chr5:142784222
		Cognition	Executive Function	Cross-Sectional	cg06968181	303	-10.2267	[-25.187-4.734]	0.18136	0.9656	0.05291	0.02403	0.66787	Island	chr5:142784323
		Cognition	Executive Function	Cross-Sectional	cg21702128	303	5.4601	[-2.602-13.522]	0.18541	0.9656	0.08227	0.00965	0.07742	Island	chr5:142784721
		Cognition	Executive Function	Cross-Sectional	cg18718518	303	0.0013	[-1.697-1.7]	0.99883	0.9988	0.53255	0.05217	0.3892	S_Shore	chr5:142785455
		Cognition	Executive Function	Cross-Sectional	cg13764763	303	-0.7543	[-2.212-0.703]	0.31133	0.9656	0.85356	0.05856	0.5219	S_Shore	chr5:142785501
		Cognition	Executive Function	Cross-Sectional	cg16224829	303	0.2759	[-2.224-2.776]	0.8289	0.9953	0.79156	0.03531	0.28375	OpenSea	chr5:142792698
		Cognition	Executive Function	Cross-Sectional	cg01751279	303	0.4202	[-2.63-3.47]	0.78735	0.9953	0.83882	0.03986	0.35649	OpenSea	chr5:142793924
		Cognition	Executive Function	Cross-Sectional	cg23430507	303	0.2283	[-3.435-3.892]	0.90289	0.9953	0.67871	0.03655	0.31636	OpenSea	chr5:142798375
		Cognition	Executive Function	Cross-Sectional	cg17349736	303	-5.169	[-10.837-0.499]	0.07495	0.9656	0.8687	0.01502	0.1392	OpenSea	chr5:142802329
		Cognition	Executive Function	Cross-Sectional	cg14438279	303	0.6773	[-2.123-3.478]	0.63585	0.9953	0.80706	0.05892	0.46785	OpenSea	chr5:142806343
		Cognition	Executive Function	Cross-Sectional	cg08423118	303	0.7052	[-0.479-1.889]	0.24408	0.9656	0.77492	0.07191	0.32112	OpenSea	chr5:142808610
		Cognition	Executive Function	Cross-Sectional	cg23776787	303	-4.4066	[-12.873-4.06]	0.30851	0.9656	0.05181	0.01906	0.42487	OpenSea	chr5:142814315
		Cognition	Executive Function	Cross-Sectional	cg03906910	303	-0.6562	[-3.258-1.946]	0.62148	0.9953	0.22081	0.05239	0.37839	OpenSea	chr5:142814388
		Cognition	Executive Function	Cross-Sectional	cg07589972	303	-1.1609	[-11.681-9.36]	0.82893	0.9953	0.90005	0.01417	0.2547	OpenSea	chr5:142815463
		Cognition	Executive Function	Cross-Sectional	cg12466613	303	7.2328	[-4.951-19.416]	0.24557	0.9656	0.91748	0.01192	0.24478	OpenSea	chr5:142815469
		Cognition	Executive Function	Cross-Sectional	cg21979215	303	-0.088	[-1.219-1.043]	0.87898	0.9953	0.76917	0.06877	0.39558	OpenSea	chr5:142815807
		Cognition	Executive Function	Cross-Sectional	cg11022710	303	-3.8465	[-10.013-2.32]	0.22246	0.9656	0.90751	0.01966	0.20763	OpenSea	chr5:142820479
		Cognition	Executive Function	Longitudinal	cg23650353	272	0.0032	[-0.327-0.333]	0.98484	0.9865	0.92108	0.028	0.43394	OpenSea	chr4:148993643
		Cognition	Executive Function	Longitudinal	cg19491599	272	0.2389	[-0.042-0.519]	0.09634	0.8013	0.84529	0.0161	0.20857	OpenSea	chr4:149000607
		Cognition	Executive Function	Longitudinal	cg10207656	272	0.0987	[-0.256-0.454]	0.58625	0.9299	0.90855	0.01373	0.20071	OpenSea	chr4:149019526
		Cognition	Executive Function	Longitudinal	cg09143276	272	0.0637	[-0.124-0.251]	0.50568	0.8476	0.80845	0.02074	0.13091	OpenSea	chr4:149066518
		Cognition	Executive Function	Longitudinal	cg13000004	272	-0.3753	[-0.737--0.013]	0.04321	0.7951	0.86983	0.01161	0.09813	OpenSea	chr4:149074093
		Cognition	Executive Function	Longitudinal	cg10590842	272	-0.0179	[-0.41-0.374]	0.92886	0.9865	0.9034	0.01143	0.10122	OpenSea	chr4:149083955
		Cognition	Executive Function	Longitudinal	cg21701890	272	0.0109	[-0.173-0.195]	0.90758	0.9865	0.61622	0.02898	0.23369	OpenSea	chr4:149094632
		Cognition	Executive Function	Longitudinal	cg27234800	272	-0.0731	[-0.139--0.008]	0.02957	0.68	0.89127	0.0525	0.39493	OpenSea	chr4:149116611
		Cognition	Executive Function	Longitudinal	cg25672354	272	-0.111	[-0.343-0.121]	0.35011	0.8476	0.86697	0.01933	0.23574	OpenSea	chr4:149122383
		Cognition	Executive Function	Longitudinal	cg10993059	272	0.0852	[-0.288-0.458]	0.65471	0.9314	0.892	0.014	0.24786	OpenSea	chr4:149123062
		Cognition	Executive Function	Longitudinal	cg07335874	272	0.0169	[-0.364-0.398]	0.93097	0.9865	0.89734	0.01678	0.25463	OpenSea	chr4:149136507
		Cognition	Executive Function	Longitudinal	cg08264907	272	0.066	[-0.431-0.563]	0.79492	0.9751	0.90365	0.00834	0.08404	OpenSea	chr4:149144045
		Cognition	Executive Function	Longitudinal	cg07275757	272	0.1363	[-0.248-0.52]	0.48734	0.8476	0.89578	0.01331	0.13086	OpenSea	chr4:149189974
		Cognition	Executive Function	Longitudinal	cg13157799	272	-0.1441	[-0.54-0.252]	0.47585	0.8476	0.05908	0.01227	0.14832	OpenSea	chr4:149191991
		Cognition	Executive Function	Longitudinal	cg00328411	272	0.0334	[-0.47-0.537]	0.89668	0.9865	0.90656	0.00839	0.10838	OpenSea	chr4:149205617
		Cognition	Executive Function	Longitudinal	cg02471166	272	-0.0958	[-0.266-0.074]	0.27022	0.8013	0.62905	0.02431	0.28086	OpenSea	chr4:149244985
		Cognition	Executive Function	Longitudinal	cg27225476	272	0.099	[-0.147-0.345]	0.43098	0.8476	0.85878	0.01502	0.11725	OpenSea	chr4:149275542
		Cognition	Executive Function	Longitudinal	cg06240648	272	0.5261	[0.057-0.995]	0.02876	0.68	0.90857	0.00875	0.08216	OpenSea	chr4:149289762
		Cognition	Executive Function	Longitudinal	cg04867484	272	0.1388	[-0.083-0.361]	0.22119	0.8013	0.06179	0.03171	0.6046	OpenSea	chr4:149297469
		Cognition	Executive Function	Longitudinal	cg19496136	272	0.041	[-0.062-0.144]	0.43626	0.8476	0.74636	0.06158	0.84904	OpenSea	chr4:149336765
		Cognition	Executive Function	Longitudinal	cg17253842	272	0.1454	[-0.123-0.414]	0.28993	0.8013	0.87057	0.02004	0.40157	OpenSea	chr4:149347991
		Cognition	Executive Function	Longitudinal	cg19650300	272	0.1879	[-0.137-0.513]	0.25804	0.8013	0.87161	0.0124	0.12937	OpenSea	chr4:149357960
		Cognition	Executive Function	Longitudinal	cg09238384	272	0.5522	[0.208-0.896]	0.00184	0.1697	0.88033	0.01059	0.10479	OpenSea	chr4:149358199
		Cognition	Executive Function	Longitudinal	cg07651033	272	-0.1397	[-0.41-0.131]	0.31216	0.8205	0.891	0.01412	0.08448	OpenSea	chr4:149359043
		Cognition	Executive Function	Longitudinal	cg23329208	272	0.0342	[-0.352-0.421]	0.86246	0.9865	0.89218	0.01003	0.08891	N_Shelf	chr4:149360981
		Cognition	Executive Function	Longitudinal	cg05437692	272	0.0747	[-0.062-0.212]	0.28608	0.8013	0.28837	0.04393	0.32226	N_Shore	chr4:149362435
		Cognition	Executive Function	Longitudinal	cg27460943	272	0.0619	[-0.169-0.293]	0.59993	0.9314	0.08292	0.02603	0.31306	N_Shore	chr4:149362809
		Cognition	Executive Function	Longitudinal	cg01576854	272	-0.0295	[-0.429-0.37]	0.88484	0.9865	0.07386	0.01207	0.20464	Island	chr4:149363450
		Cognition	Executive Function	Longitudinal	cg13996731	272	-0.323	[-0.751-0.105]	0.14015	0.8013	0.05943	0.00984	0.12921	Island	chr4:149363522
		Cognition	Executive Function	Longitudinal	cg20140452	272	-0.1518	[-0.551-0.247]	0.45678	0.8476	0.07045	0.00971	0.0619	Island	chr4:149363715
		Cognition	Executive Function	Longitudinal	cg10621979	272	-0.164	[-0.576-0.247]	0.43531	0.8476	0.05355	0.018	0.29521	Island	chr4:149365824
		Cognition	Executive Function	Longitudinal	cg11239219	272	0.0511	[-0.328-0.431]	0.79191	0.9751	0.05479	0.02153	0.3658	Island	chr4:149365887
		Cognition	Executive Function	Longitudinal	cg10002915	272	-0.0261	[-0.075-0.023]	0.29612	0.8013	0.54242	0.08455	0.73095	S_Shelf	chr4:149369175
		Cognition	Executive Function	Longitudinal	cg15374100	272	0.299	[-0.05-0.648]	0.09398	0.8013	0.86961	0.01354	0.2065	OpenSea	chr5:142651239
		Cognition	Executive Function	Longitudinal	cg15740681	272	0.176	[-0.282-0.634]	0.45191	0.8476	0.89095	0.00925	0.09622	OpenSea	chr5:142653066
		Cognition	Executive Function	Longitudinal	cg26081259	272	0.3844	[-0.132-0.901]	0.14563	0.8013	0.92585	0.00714	0.05144	OpenSea	chr5:142659682
		Cognition	Executive Function	Longitudinal	cg13514002	272	0.0354	[-0.332-0.403]	0.85043	0.9865	0.9104	0.01216	0.16497	OpenSea	chr5:142677292
		Cognition	Executive Function	Longitudinal	cg24801588	272	-0.1227	[-0.48-0.234]	0.50121	0.8476	0.87613	0.01121	0.08119	OpenSea	chr5:142689858
		Cognition	Executive Function	Longitudinal	cg00407401	272	0.2457	[-0.152-0.644]	0.22731	0.8013	0.88336	0.0113	0.12225	OpenSea	chr5:142690959
		Cognition	Executive Function	Longitudinal	cg19457823	272	-0.0527	[-0.136-0.031]	0.21711	0.8013	0.85324	0.04572	0.44993	OpenSea	chr5:142692961
		Cognition	Executive Function	Longitudinal	cg12741214	272	0.3468	[-0.163-0.856]	0.18353	0.8013	0.92153	0.00739	0.05446	OpenSea	chr5:142695619
		Cognition	Executive Function	Longitudinal	cg04457787	272	-0.2129	[-0.684-0.258]	0.37673	0.8476	0.91851	0.00864	0.10367	OpenSea	chr5:142695636
		Cognition	Executive Function	Longitudinal	cg20728768	272	0.0335	[-0.081-0.148]	0.56627	0.914	0.28495	0.05593	0.42144	OpenSea	chr5:142696594
		Cognition	Executive Function	Longitudinal	cg25708981	272	0.0128	[-0.1-0.126]	0.8244	0.9865	0.81142	0.04619	0.93615	OpenSea	chr5:142697868
		Cognition	Executive Function	Longitudinal	cg19645279	272	0.0014	[-0.131-0.133]	0.98379	0.9865	0.50627	0.03156	0.23017	OpenSea	chr5:142702733
		Cognition	Executive Function	Longitudinal	cg19176661	272	0.0745	[-0.319-0.468]	0.71059	0.9474	0.90339	0.00908	0.09406	OpenSea	chr5:142718549
		Cognition	Executive Function	Longitudinal	cg07715663	272	0.295	[-0.217-0.807]	0.25978	0.8013	0.89993	0.0077	0.06068	OpenSea	chr5:142721796
		Cognition	Executive Function	Longitudinal	cg24052866	272	-0.0045	[-0.119-0.11]	0.93903	0.9865	0.69336	0.03805	0.44354	OpenSea	chr5:142727470
		Cognition	Executive Function	Longitudinal	cg22233604	272	0.1109	[-0.092-0.313]	0.28436	0.8013	0.80239	0.02828	0.34628	OpenSea	chr5:142729377
		Cognition	Executive Function	Longitudinal	cg03857453	272	-0.001	[-0.121-0.119]	0.98647	0.9865	0.71757	0.04588	0.42058	OpenSea	chr5:142729913
		Cognition	Executive Function	Longitudinal	cg15115787	272	-0.0647	[-0.211-0.081]	0.38618	0.8476	0.2334	0.0467	0.33835	OpenSea	chr5:142730701
		Cognition	Executive Function	Longitudinal	cg12888360	272	-0.0302	[-0.154-0.093]	0.63178	0.9314	0.19071	0.0335	0.21819	OpenSea	chr5:142732502
		Cognition	Executive Function	Longitudinal	cg18484679	272	0.0708	[-0.209-0.351]	0.62033	0.9314	0.85401	0.0155	0.16305	OpenSea	chr5:142740314
		Cognition	Executive Function	Longitudinal	cg16586394	272	0.2523	[-0.136-0.641]	0.2043	0.8013	0.90913	0.01422	0.19939	OpenSea	chr5:142757011
		Cognition	Executive Function	Longitudinal	cg25535999	272	-0.0872	[-0.467-0.293]	0.653	0.9314	0.89419	0.01191	0.0902	OpenSea	chr5:142757312
		Cognition	Executive Function	Longitudinal	cg03746860	272	0.2338	[-0.133-0.601]	0.21272	0.8013	0.89502	0.01114	0.14119	OpenSea	chr5:142759375
		Cognition	Executive Function	Longitudinal	cg20598211	272	0.2866	[-0.152-0.725]	0.20163	0.8013	0.91627	0.01158	0.20941	OpenSea	chr5:142762454
		Cognition	Executive Function	Longitudinal	cg05483455	272	0.3597	[-0.259-0.979]	0.25562	0.8013	0.92855	0.00637	0.07369	OpenSea	chr5:142762613
		Cognition	Executive Function	Longitudinal	cg16594263	272	-0.4088	[-0.969-0.151]	0.15383	0.8013	0.91923	0.01644	0.42455	OpenSea	chr5:142768048
		Cognition	Executive Function	Longitudinal	cg16535116	272	0.1798	[-0.025-0.385]	0.08682	0.8013	0.82395	0.0209	0.17773	OpenSea	chr5:142769612
		Cognition	Executive Function	Longitudinal	cg05900547	272	0.2126	[-0.012-0.437]	0.06433	0.8013	0.82362	0.01868	0.15468	OpenSea	chr5:142769791
		Cognition	Executive Function	Longitudinal	cg19432243	272	0.0253	[-0.049-0.1]	0.50675	0.8476	0.75237	0.06043	0.89556	OpenSea	chr5:142770757
		Cognition	Executive Function	Longitudinal	cg19820298	272	0.0227	[-0.05-0.096]	0.54249	0.8912	0.78285	0.05639	0.30689	OpenSea	chr5:142770782
		Cognition	Executive Function	Longitudinal	cg27107893	272	-0.0258	[-0.066-0.014]	0.20665	0.8013	0.79309	0.09578	0.9445	OpenSea	chr5:142776274
		Cognition	Executive Function	Longitudinal	cg17342132	272	-0.0067	[-0.203-0.19]	0.94668	0.9865	0.86999	0.03297	0.31216	N_Shore	chr5:142780254
		Cognition	Executive Function	Longitudinal	cg07742588	272	0.0871	[-0.016-0.19]	0.09997	0.8013	0.78914	0.05595	0.91885	N_Shore	chr5:142780439
		Cognition	Executive Function	Longitudinal	cg00294552	272	-0.0107	[-0.183-0.161]	0.90286	0.9865	0.84207	0.02221	0.20462	N_Shore	chr5:142780486
		Cognition	Executive Function	Longitudinal	cg16219186	272	0.1061	[-0.118-0.33]	0.35395	0.8476	0.88479	0.02148	0.22312	N_Shore	chr5:142780531
		Cognition	Executive Function	Longitudinal	cg08845721	272	0.0029	[-0.223-0.228]	0.97985	0.9865	0.90291	0.02257	0.35006	N_Shore	chr5:142780693
		Cognition	Executive Function	Longitudinal	cg12969488	272	0.0258	[-0.094-0.146]	0.6739	0.9314	0.6959	0.03946	0.36342	N_Shore	chr5:142780984
		Cognition	Executive Function	Longitudinal	cg07733851	272	0.0465	[-0.022-0.115]	0.18512	0.8013	0.31012	0.05444	0.48866	N_Shore	chr5:142781498
		Cognition	Executive Function	Longitudinal	cg27122725	272	-0.2285	[-0.588-0.131]	0.21407	0.8013	0.08247	0.03649	0.61758	N_Shore	chr5:142781723
		Cognition	Executive Function	Longitudinal	cg06952416	272	-0.0545	[-0.31-0.201]	0.67614	0.9314	0.10317	0.01595	0.14679	N_Shore	chr5:142781736
		Cognition	Executive Function	Longitudinal	cg15910486	272	0.1299	[-0.204-0.464]	0.44653	0.8476	0.06987	0.01223	0.07877	Island	chr5:142783621
		Cognition	Executive Function	Longitudinal	cg01967637	272	0.0387	[-0.252-0.329]	0.79413	0.9751	0.05849	0.01419	0.08687	Island	chr5:142784019
		Cognition	Executive Function	Longitudinal	cg26464411	272	-0.0612	[-0.373-0.251]	0.70104	0.9474	0.0622	0.01192	0.08127	Island	chr5:142784222
		Cognition	Executive Function	Longitudinal	cg06968181	272	0.1081	[-0.642-0.858]	0.77774	0.9751	0.05291	0.02403	0.66787	Island	chr5:142784323
		Cognition	Executive Function	Longitudinal	cg21702128	272	-0.3183	[-0.709-0.073]	0.11167	0.8013	0.08227	0.00965	0.07742	Island	chr5:142784721
		Cognition	Executive Function	Longitudinal	cg18718518	272	-0.0386	[-0.125-0.048]	0.38201	0.8476	0.53255	0.05217	0.3892	S_Shore	chr5:142785455
		Cognition	Executive Function	Longitudinal	cg13764763	272	-0.0586	[-0.132-0.015]	0.11882	0.8013	0.85356	0.05856	0.5219	S_Shore	chr5:142785501
		Cognition	Executive Function	Longitudinal	cg16224829	272	-0.045	[-0.17-0.08]	0.48263	0.8476	0.79156	0.03531	0.28375	OpenSea	chr5:142792698
		Cognition	Executive Function	Longitudinal	cg01751279	272	-0.0021	[-0.151-0.147]	0.9784	0.9865	0.83882	0.03986	0.35649	OpenSea	chr5:142793924
		Cognition	Executive Function	Longitudinal	cg23430507	272	-0.0764	[-0.26-0.107]	0.41574	0.8476	0.67871	0.03655	0.31636	OpenSea	chr5:142798375
		Cognition	Executive Function	Longitudinal	cg17349736	272	0.1415	[-0.144-0.427]	0.33221	0.8476	0.8687	0.01502	0.1392	OpenSea	chr5:142802329
		Cognition	Executive Function	Longitudinal	cg14438279	272	-0.0296	[-0.168-0.109]	0.67692	0.9314	0.80706	0.05892	0.46785	OpenSea	chr5:142806343
		Cognition	Executive Function	Longitudinal	cg08423118	272	-0.07	[-0.128--0.012]	0.01795	0.68	0.77492	0.07191	0.32112	OpenSea	chr5:142808610
		Cognition	Executive Function	Longitudinal	cg23776787	272	0.0212	[-0.406-0.448]	0.92261	0.9865	0.05181	0.01906	0.42487	OpenSea	chr5:142814315
		Cognition	Executive Function	Longitudinal	cg03906910	272	-0.0523	[-0.187-0.082]	0.4466	0.8476	0.22081	0.05239	0.37839	OpenSea	chr5:142814388
		Cognition	Executive Function	Longitudinal	cg07589972	272	0.4052	[-0.104-0.914]	0.11982	0.8013	0.90005	0.01417	0.2547	OpenSea	chr5:142815463
		Cognition	Executive Function	Longitudinal	cg12466613	272	-0.1267	[-0.725-0.471]	0.6783	0.9314	0.91748	0.01192	0.24478	OpenSea	chr5:142815469
		Cognition	Executive Function	Longitudinal	cg21979215	272	0.0085	[-0.048-0.065]	0.7685	0.9751	0.76917	0.06877	0.39558	OpenSea	chr5:142815807
		Cognition	Executive Function	Longitudinal	cg11022710	272	-0.0416	[-0.352-0.269]	0.79325	0.9751	0.90751	0.01966	0.20763	OpenSea	chr5:142820479
		Cognition	Language	Cross-Sectional	cg23650353	303	0.2341	[-7.558-8.027]	0.95308	0.9991	0.92108	0.028	0.43394	OpenSea	chr4:148993643
		Cognition	Language	Cross-Sectional	cg19491599	303	-3.5626	[-10.109-2.984]	0.28705	0.983	0.84529	0.0161	0.20857	OpenSea	chr4:149000607
		Cognition	Language	Cross-Sectional	cg10207656	303	-0.6003	[-8.912-7.712]	0.88753	0.983	0.90855	0.01373	0.20071	OpenSea	chr4:149019526
		Cognition	Language	Cross-Sectional	cg09143276	303	0.3201	[-4.117-4.757]	0.88765	0.983	0.80845	0.02074	0.13091	OpenSea	chr4:149066518
		Cognition	Language	Cross-Sectional	cg13000004	303	2.5753	[-5.804-10.954]	0.54738	0.983	0.86983	0.01161	0.09813	OpenSea	chr4:149074093
		Cognition	Language	Cross-Sectional	cg10590842	303	-3.331	[-12.475-5.813]	0.4758	0.983	0.9034	0.01143	0.10122	OpenSea	chr4:149083955
		Cognition	Language	Cross-Sectional	cg21701890	303	-2.4417	[-6.685-1.801]	0.26031	0.983	0.61622	0.02898	0.23369	OpenSea	chr4:149094632
		Cognition	Language	Cross-Sectional	cg27234800	303	1.1677	[-0.42-2.756]	0.15061	0.983	0.89127	0.0525	0.39493	OpenSea	chr4:149116611
		Cognition	Language	Cross-Sectional	cg25672354	303	1.8361	[-3.65-7.322]	0.51238	0.983	0.86697	0.01933	0.23574	OpenSea	chr4:149122383
		Cognition	Language	Cross-Sectional	cg10993059	303	3.7248	[-4.582-12.032]	0.38022	0.983	0.892	0.014	0.24786	OpenSea	chr4:149123062
		Cognition	Language	Cross-Sectional	cg07335874	303	-0.6276	[-9.197-7.942]	0.88595	0.983	0.89734	0.01678	0.25463	OpenSea	chr4:149136507
		Cognition	Language	Cross-Sectional	cg08264907	303	0.0236	[-11.626-11.673]	0.99684	0.9997	0.90365	0.00834	0.08404	OpenSea	chr4:149144045
		Cognition	Language	Cross-Sectional	cg07275757	303	-1.8335	[-10.594-6.927]	0.68195	0.983	0.89578	0.01331	0.13086	OpenSea	chr4:149189974
		Cognition	Language	Cross-Sectional	cg13157799	303	2.0876	[-6.862-11.037]	0.64786	0.983	0.05908	0.01227	0.14832	OpenSea	chr4:149191991
		Cognition	Language	Cross-Sectional	cg00328411	303	4.8468	[-6.965-16.659]	0.42193	0.983	0.90656	0.00839	0.10838	OpenSea	chr4:149205617
		Cognition	Language	Cross-Sectional	cg02471166	303	-0.6871	[-4.627-3.252]	0.7327	0.983	0.62905	0.02431	0.28086	OpenSea	chr4:149244985
		Cognition	Language	Cross-Sectional	cg27225476	303	1.5232	[-4.197-7.243]	0.60212	0.983	0.85878	0.01502	0.11725	OpenSea	chr4:149275542
		Cognition	Language	Cross-Sectional	cg06240648	303	2.3223	[-8.677-13.322]	0.67931	0.983	0.90857	0.00875	0.08216	OpenSea	chr4:149289762
		Cognition	Language	Cross-Sectional	cg04867484	303	-1.2554	[-6.43-3.92]	0.63481	0.983	0.06179	0.03171	0.6046	OpenSea	chr4:149297469
		Cognition	Language	Cross-Sectional	cg19496136	303	-0.2658	[-2.711-2.18]	0.83149	0.983	0.74636	0.06158	0.84904	OpenSea	chr4:149336765
		Cognition	Language	Cross-Sectional	cg17253842	303	-3.4484	[-9.725-2.828]	0.28246	0.983	0.87057	0.02004	0.40157	OpenSea	chr4:149347991
		Cognition	Language	Cross-Sectional	cg19650300	303	-0.809	[-8.545-6.927]	0.83776	0.983	0.87161	0.0124	0.12937	OpenSea	chr4:149357960
		Cognition	Language	Cross-Sectional	cg09238384	303	-2.5275	[-10.782-5.727]	0.5489	0.983	0.88033	0.01059	0.10479	OpenSea	chr4:149358199
		Cognition	Language	Cross-Sectional	cg07651033	303	2.1831	[-4.158-8.524]	0.50035	0.983	0.891	0.01412	0.08448	OpenSea	chr4:149359043
		Cognition	Language	Cross-Sectional	cg23329208	303	-8.0594	[-16.913-0.794]	0.07546	0.983	0.89218	0.01003	0.08891	N_Shelf	chr4:149360981
		Cognition	Language	Cross-Sectional	cg05437692	303	0.6322	[-2.611-3.875]	0.70264	0.983	0.28837	0.04393	0.32226	N_Shore	chr4:149362435
		Cognition	Language	Cross-Sectional	cg27460943	303	5.9399	[0.678-11.201]	0.02771	0.8497	0.08292	0.02603	0.31306	N_Shore	chr4:149362809
		Cognition	Language	Cross-Sectional	cg01576854	303	2.429	[-7.025-11.883]	0.61495	0.983	0.07386	0.01207	0.20464	Island	chr4:149363450
		Cognition	Language	Cross-Sectional	cg13996731	303	-0.0428	[-10.138-10.053]	0.99337	0.9997	0.05943	0.00984	0.12921	Island	chr4:149363522
		Cognition	Language	Cross-Sectional	cg20140452	303	1.3864	[-7.993-10.766]	0.77225	0.983	0.07045	0.00971	0.0619	Island	chr4:149363715
		Cognition	Language	Cross-Sectional	cg10621979	303	2.1502	[-7.501-11.801]	0.66268	0.983	0.05355	0.018	0.29521	Island	chr4:149365824
		Cognition	Language	Cross-Sectional	cg11239219	303	1.869	[-7.044-10.782]	0.68138	0.983	0.05479	0.02153	0.3658	Island	chr4:149365887
		Cognition	Language	Cross-Sectional	cg10002915	303	-0.1643	[-1.312-0.983]	0.77921	0.983	0.54242	0.08455	0.73095	S_Shelf	chr4:149369175
		Cognition	Language	Cross-Sectional	cg15374100	303	-3.7072	[-11.535-4.121]	0.35407	0.983	0.86961	0.01354	0.2065	OpenSea	chr5:142651239
		Cognition	Language	Cross-Sectional	cg15740681	303	10.0832	[-0.449-20.615]	0.06162	0.983	0.89095	0.00925	0.09622	OpenSea	chr5:142653066
		Cognition	Language	Cross-Sectional	cg26081259	303	-8.2914	[-20.324-3.741]	0.17791	0.983	0.92585	0.00714	0.05144	OpenSea	chr5:142659682
		Cognition	Language	Cross-Sectional	cg13514002	303	-0.6548	[-9.266-7.956]	0.88163	0.983	0.9104	0.01216	0.16497	OpenSea	chr5:142677292
		Cognition	Language	Cross-Sectional	cg24801588	303	1.5614	[-6.784-9.907]	0.71411	0.983	0.87613	0.01121	0.08119	OpenSea	chr5:142689858
		Cognition	Language	Cross-Sectional	cg00407401	303	6.0796	[-2.925-15.084]	0.1868	0.983	0.88336	0.0113	0.12225	OpenSea	chr5:142690959
		Cognition	Language	Cross-Sectional	cg19457823	303	-0.6105	[-2.647-1.426]	0.55733	0.983	0.85324	0.04572	0.44993	OpenSea	chr5:142692961
		Cognition	Language	Cross-Sectional	cg12741214	303	6.3165	[-5.551-18.184]	0.29773	0.983	0.92153	0.00739	0.05446	OpenSea	chr5:142695619
		Cognition	Language	Cross-Sectional	cg04457787	303	4.2238	[-6.692-15.139]	0.44883	0.983	0.91851	0.00864	0.10367	OpenSea	chr5:142695636
		Cognition	Language	Cross-Sectional	cg20728768	303	1.9067	[-0.797-4.611]	0.16806	0.983	0.28495	0.05593	0.42144	OpenSea	chr5:142696594
		Cognition	Language	Cross-Sectional	cg25708981	303	1.2596	[-1.333-3.853]	0.34185	0.983	0.81142	0.04619	0.93615	OpenSea	chr5:142697868
		Cognition	Language	Cross-Sectional	cg19645279	303	2.0022	[-0.969-4.974]	0.18769	0.983	0.50627	0.03156	0.23017	OpenSea	chr5:142702733
		Cognition	Language	Cross-Sectional	cg19176661	303	3.8309	[-5.368-13.03]	0.41504	0.983	0.90339	0.00908	0.09406	OpenSea	chr5:142718549
		Cognition	Language	Cross-Sectional	cg07715663	303	-2.6902	[-14.631-9.25]	0.65913	0.983	0.89993	0.0077	0.06068	OpenSea	chr5:142721796
		Cognition	Language	Cross-Sectional	cg24052866	303	0.6651	[-2.016-3.346]	0.62724	0.983	0.69336	0.03805	0.44354	OpenSea	chr5:142727470
		Cognition	Language	Cross-Sectional	cg22233604	303	1.0356	[-3.62-5.692]	0.6632	0.983	0.80239	0.02828	0.34628	OpenSea	chr5:142729377
		Cognition	Language	Cross-Sectional	cg03857453	303	-1.3459	[-4.131-1.439]	0.34439	0.983	0.71757	0.04588	0.42058	OpenSea	chr5:142729913
		Cognition	Language	Cross-Sectional	cg15115787	303	1.6901	[-1.7-5.08]	0.32932	0.983	0.2334	0.0467	0.33835	OpenSea	chr5:142730701
		Cognition	Language	Cross-Sectional	cg12888360	303	-0.6127	[-3.524-2.299]	0.6803	0.983	0.19071	0.0335	0.21819	OpenSea	chr5:142732502
		Cognition	Language	Cross-Sectional	cg18484679	303	-4.0057	[-10.348-2.336]	0.21674	0.983	0.85401	0.0155	0.16305	OpenSea	chr5:142740314
		Cognition	Language	Cross-Sectional	cg16586394	303	4.2642	[-4.803-13.331]	0.35743	0.983	0.90913	0.01422	0.19939	OpenSea	chr5:142757011
		Cognition	Language	Cross-Sectional	cg25535999	303	-5.7884	[-14.439-2.863]	0.19077	0.983	0.89419	0.01191	0.0902	OpenSea	chr5:142757312
		Cognition	Language	Cross-Sectional	cg03746860	303	-3.4586	[-12.105-5.188]	0.43369	0.983	0.89502	0.01114	0.14119	OpenSea	chr5:142759375
		Cognition	Language	Cross-Sectional	cg20598211	303	1.247	[-8.882-11.376]	0.80949	0.983	0.91627	0.01158	0.20941	OpenSea	chr5:142762454
		Cognition	Language	Cross-Sectional	cg05483455	303	-8.8841	[-21.923-4.154]	0.18278	0.983	0.92855	0.00637	0.07369	OpenSea	chr5:142762613
		Cognition	Language	Cross-Sectional	cg16594263	303	-1.4245	[-14.654-11.805]	0.833	0.983	0.91923	0.01644	0.42455	OpenSea	chr5:142768048
		Cognition	Language	Cross-Sectional	cg16535116	303	-5.4116	[-10.176--0.647]	0.02679	0.8497	0.82395	0.0209	0.17773	OpenSea	chr5:142769612
		Cognition	Language	Cross-Sectional	cg05900547	303	0.4931	[-4.764-5.75]	0.85427	0.983	0.82362	0.01868	0.15468	OpenSea	chr5:142769791
		Cognition	Language	Cross-Sectional	cg19432243	303	0.2318	[-1.509-1.973]	0.79428	0.983	0.75237	0.06043	0.89556	OpenSea	chr5:142770757
		Cognition	Language	Cross-Sectional	cg19820298	303	-0.9092	[-2.589-0.77]	0.28957	0.983	0.78285	0.05639	0.30689	OpenSea	chr5:142770782
		Cognition	Language	Cross-Sectional	cg27107893	303	-0.7918	[-1.707-0.123]	0.09101	0.983	0.79309	0.09578	0.9445	OpenSea	chr5:142776274
		Cognition	Language	Cross-Sectional	cg17342132	303	-3.0091	[-7.635-1.617]	0.20335	0.983	0.86999	0.03297	0.31216	N_Shore	chr5:142780254
		Cognition	Language	Cross-Sectional	cg07742588	303	-0.9569	[-3.42-1.506]	0.44702	0.983	0.78914	0.05595	0.91885	N_Shore	chr5:142780439
		Cognition	Language	Cross-Sectional	cg00294552	303	0.8849	[-3.206-4.976]	0.67192	0.983	0.84207	0.02221	0.20462	N_Shore	chr5:142780486
		Cognition	Language	Cross-Sectional	cg16219186	303	-3.0819	[-8.359-2.196]	0.25334	0.983	0.88479	0.02148	0.22312	N_Shore	chr5:142780531
		Cognition	Language	Cross-Sectional	cg08845721	303	-2.8337	[-8.044-2.376]	0.28731	0.983	0.90291	0.02257	0.35006	N_Shore	chr5:142780693
		Cognition	Language	Cross-Sectional	cg12969488	303	-1.3441	[-4.148-1.46]	0.3483	0.983	0.6959	0.03946	0.36342	N_Shore	chr5:142780984
		Cognition	Language	Cross-Sectional	cg07733851	303	-0.0372	[-1.655-1.58]	0.96412	0.9991	0.31012	0.05444	0.48866	N_Shore	chr5:142781498
		Cognition	Language	Cross-Sectional	cg27122725	303	-1.4389	[-9.998-7.12]	0.74202	0.983	0.08247	0.03649	0.61758	N_Shore	chr5:142781723
		Cognition	Language	Cross-Sectional	cg06952416	303	-2.9913	[-8.933-2.951]	0.32463	0.983	0.10317	0.01595	0.14679	N_Shore	chr5:142781736
		Cognition	Language	Cross-Sectional	cg15910486	303	2.62	[-5.218-10.458]	0.51288	0.983	0.06987	0.01223	0.07877	Island	chr5:142783621
		Cognition	Language	Cross-Sectional	cg01967637	303	0.5004	[-6.153-7.153]	0.8829	0.983	0.05849	0.01419	0.08687	Island	chr5:142784019
		Cognition	Language	Cross-Sectional	cg26464411	303	-3.5249	[-10.715-3.665]	0.33742	0.983	0.0622	0.01192	0.08127	Island	chr5:142784222
		Cognition	Language	Cross-Sectional	cg06968181	303	-5.1232	[-22.35-12.104]	0.56043	0.983	0.05291	0.02403	0.66787	Island	chr5:142784323
		Cognition	Language	Cross-Sectional	cg21702128	303	6.3956	[-2.863-15.654]	0.17682	0.983	0.08227	0.00965	0.07742	Island	chr5:142784721
		Cognition	Language	Cross-Sectional	cg18718518	303	-1.5919	[-3.534-0.35]	0.1092	0.983	0.53255	0.05217	0.3892	S_Shore	chr5:142785455
		Cognition	Language	Cross-Sectional	cg13764763	303	-0.1103	[-1.787-1.567]	0.89749	0.983	0.85356	0.05856	0.5219	S_Shore	chr5:142785501
		Cognition	Language	Cross-Sectional	cg16224829	303	-1.6476	[-4.513-1.218]	0.26064	0.983	0.79156	0.03531	0.28375	OpenSea	chr5:142792698
		Cognition	Language	Cross-Sectional	cg01751279	303	-0.1216	[-3.625-3.382]	0.94583	0.9991	0.83882	0.03986	0.35649	OpenSea	chr5:142793924
		Cognition	Language	Cross-Sectional	cg23430507	303	0.1567	[-4.051-4.365]	0.94185	0.9991	0.67871	0.03655	0.31636	OpenSea	chr5:142798375
		Cognition	Language	Cross-Sectional	cg17349736	303	-0.1404	[-6.687-6.407]	0.96649	0.9991	0.8687	0.01502	0.1392	OpenSea	chr5:142802329
		Cognition	Language	Cross-Sectional	cg14438279	303	-0.7666	[-3.984-2.45]	0.64078	0.983	0.80706	0.05892	0.46785	OpenSea	chr5:142806343
		Cognition	Language	Cross-Sectional	cg08423118	303	-0.246	[-1.609-1.117]	0.72379	0.983	0.77492	0.07191	0.32112	OpenSea	chr5:142808610
		Cognition	Language	Cross-Sectional	cg23776787	303	-12.2887	[-21.925--2.652]	0.013	0.8497	0.05181	0.01906	0.42487	OpenSea	chr5:142814315
		Cognition	Language	Cross-Sectional	cg03906910	303	-0.447	[-3.436-2.542]	0.7697	0.983	0.22081	0.05239	0.37839	OpenSea	chr5:142814388
		Cognition	Language	Cross-Sectional	cg07589972	303	5.459	[-6.609-17.527]	0.37604	0.983	0.90005	0.01417	0.2547	OpenSea	chr5:142815463
		Cognition	Language	Cross-Sectional	cg12466613	303	-0.0027	[-14.029-14.024]	0.9997	0.9997	0.91748	0.01192	0.24478	OpenSea	chr5:142815469
		Cognition	Language	Cross-Sectional	cg21979215	303	0.1282	[-1.171-1.427]	0.84684	0.983	0.76917	0.06877	0.39558	OpenSea	chr5:142815807
		Cognition	Language	Cross-Sectional	cg11022710	303	3.1379	[-3.954-10.229]	0.38652	0.983	0.90751	0.01966	0.20763	OpenSea	chr5:142820479
		Cognition	Language	Longitudinal	cg23650353	272	0.106	[-0.795-1.007]	0.81778	0.9958	0.92108	0.028	0.43394	OpenSea	chr4:148993643
		Cognition	Language	Longitudinal	cg19491599	272	0.5393	[-0.229-1.307]	0.16998	0.6255	0.84529	0.0161	0.20857	OpenSea	chr4:149000607
		Cognition	Language	Longitudinal	cg10207656	272	0.7642	[-0.202-1.73]	0.12215	0.6243	0.90855	0.01373	0.20071	OpenSea	chr4:149019526
		Cognition	Language	Longitudinal	cg09143276	272	0.1158	[-0.396-0.627]	0.65764	0.9816	0.80845	0.02074	0.13091	OpenSea	chr4:149066518
		Cognition	Language	Longitudinal	cg13000004	272	-0.2706	[-1.266-0.724]	0.59451	0.9816	0.86983	0.01161	0.09813	OpenSea	chr4:149074093
		Cognition	Language	Longitudinal	cg10590842	272	-0.2212	[-1.291-0.849]	0.68575	0.9816	0.9034	0.01143	0.10122	OpenSea	chr4:149083955
		Cognition	Language	Longitudinal	cg21701890	272	0.206	[-0.298-0.71]	0.42344	0.8227	0.61622	0.02898	0.23369	OpenSea	chr4:149094632
		Cognition	Language	Longitudinal	cg27234800	272	0.074	[-0.105-0.253]	0.41802	0.8227	0.89127	0.0525	0.39493	OpenSea	chr4:149116611
		Cognition	Language	Longitudinal	cg25672354	272	-0.0055	[-0.641-0.63]	0.98646	0.9958	0.86697	0.01933	0.23574	OpenSea	chr4:149122383
		Cognition	Language	Longitudinal	cg10993059	272	0.1491	[-0.869-1.167]	0.77435	0.9958	0.892	0.014	0.24786	OpenSea	chr4:149123062
		Cognition	Language	Longitudinal	cg07335874	272	0.2257	[-0.815-1.266]	0.67101	0.9816	0.89734	0.01678	0.25463	OpenSea	chr4:149136507
		Cognition	Language	Longitudinal	cg08264907	272	0.1186	[-1.238-1.475]	0.86412	0.9958	0.90365	0.00834	0.08404	OpenSea	chr4:149144045
		Cognition	Language	Longitudinal	cg07275757	272	1.0276	[-0.014-2.069]	0.05432	0.5553	0.89578	0.01331	0.13086	OpenSea	chr4:149189974
		Cognition	Language	Longitudinal	cg13157799	272	-0.1872	[-1.267-0.893]	0.73441	0.9908	0.05908	0.01227	0.14832	OpenSea	chr4:149191991
		Cognition	Language	Longitudinal	cg00328411	272	0.7637	[-0.61-2.137]	0.27676	0.7376	0.90656	0.00839	0.10838	OpenSea	chr4:149205617
		Cognition	Language	Longitudinal	cg02471166	272	-0.1887	[-0.653-0.276]	0.42659	0.8227	0.62905	0.02431	0.28086	OpenSea	chr4:149244985
		Cognition	Language	Longitudinal	cg27225476	272	0.2762	[-0.397-0.949]	0.42206	0.8227	0.85878	0.01502	0.11725	OpenSea	chr4:149275542
		Cognition	Language	Longitudinal	cg06240648	272	0.2225	[-1.069-1.514]	0.73584	0.9908	0.90857	0.00875	0.08216	OpenSea	chr4:149289762
		Cognition	Language	Longitudinal	cg04867484	272	0.127	[-0.479-0.734]	0.68173	0.9816	0.06179	0.03171	0.6046	OpenSea	chr4:149297469
		Cognition	Language	Longitudinal	cg19496136	272	0.1667	[-0.114-0.447]	0.24577	0.7291	0.74636	0.06158	0.84904	OpenSea	chr4:149336765
		Cognition	Language	Longitudinal	cg17253842	272	0.2962	[-0.437-1.029]	0.42925	0.8227	0.87057	0.02004	0.40157	OpenSea	chr4:149347991
		Cognition	Language	Longitudinal	cg19650300	272	1.188	[0.311-2.065]	0.00845	0.3699	0.87161	0.0124	0.12937	OpenSea	chr4:149357960
		Cognition	Language	Longitudinal	cg09238384	272	1.0959	[0.149-2.043]	0.02412	0.3699	0.88033	0.01059	0.10479	OpenSea	chr4:149358199
		Cognition	Language	Longitudinal	cg07651033	272	-0.016	[-0.755-0.723]	0.96616	0.9958	0.891	0.01412	0.08448	OpenSea	chr4:149359043
		Cognition	Language	Longitudinal	cg23329208	272	-0.0465	[-1.105-1.012]	0.93139	0.9958	0.89218	0.01003	0.08891	N_Shelf	chr4:149360981
		Cognition	Language	Longitudinal	cg05437692	272	0.0472	[-0.327-0.422]	0.80523	0.9958	0.28837	0.04393	0.32226	N_Shore	chr4:149362435
		Cognition	Language	Longitudinal	cg27460943	272	0.4666	[-0.163-1.097]	0.14785	0.6255	0.08292	0.02603	0.31306	N_Shore	chr4:149362809
		Cognition	Language	Longitudinal	cg01576854	272	-0.2719	[-1.359-0.815]	0.6244	0.9816	0.07386	0.01207	0.20464	Island	chr4:149363450
		Cognition	Language	Longitudinal	cg13996731	272	-0.7327	[-1.903-0.437]	0.22077	0.7049	0.05943	0.00984	0.12921	Island	chr4:149363522
		Cognition	Language	Longitudinal	cg20140452	272	-0.1838	[-1.275-0.907]	0.74155	0.9908	0.07045	0.00971	0.0619	Island	chr4:149363715
		Cognition	Language	Longitudinal	cg10621979	272	-0.7003	[-1.822-0.421]	0.2222	0.7049	0.05355	0.018	0.29521	Island	chr4:149365824
		Cognition	Language	Longitudinal	cg11239219	272	0.028	[-1.011-1.067]	0.95795	0.9958	0.05479	0.02153	0.3658	Island	chr4:149365887
		Cognition	Language	Longitudinal	cg10002915	272	-0.1412	[-0.274--0.008]	0.03863	0.4527	0.54242	0.08455	0.73095	S_Shelf	chr4:149369175
		Cognition	Language	Longitudinal	cg15374100	272	0.7799	[-0.173-1.733]	0.11004	0.6204	0.86961	0.01354	0.2065	OpenSea	chr5:142651239
		Cognition	Language	Longitudinal	cg15740681	272	0.3701	[-0.883-1.623]	0.56318	0.9816	0.89095	0.00925	0.09622	OpenSea	chr5:142653066
		Cognition	Language	Longitudinal	cg26081259	272	1.1525	[-0.247-2.552]	0.10773	0.6204	0.92585	0.00714	0.05144	OpenSea	chr5:142659682
		Cognition	Language	Longitudinal	cg13514002	272	0.4122	[-0.588-1.412]	0.42002	0.8227	0.9104	0.01216	0.16497	OpenSea	chr5:142677292
		Cognition	Language	Longitudinal	cg24801588	272	-0.1269	[-1.103-0.849]	0.79919	0.9958	0.87613	0.01121	0.08119	OpenSea	chr5:142689858
		Cognition	Language	Longitudinal	cg00407401	272	0.0534	[-1.038-1.145]	0.92363	0.9958	0.88336	0.0113	0.12225	OpenSea	chr5:142690959
		Cognition	Language	Longitudinal	cg19457823	272	0.0291	[-0.2-0.258]	0.80326	0.9958	0.85324	0.04572	0.44993	OpenSea	chr5:142692961
		Cognition	Language	Longitudinal	cg12741214	272	0.9771	[-0.413-2.367]	0.16949	0.6255	0.92153	0.00739	0.05446	OpenSea	chr5:142695619
		Cognition	Language	Longitudinal	cg04457787	272	0.2871	[-0.997-1.571]	0.66163	0.9816	0.91851	0.00864	0.10367	OpenSea	chr5:142695636
		Cognition	Language	Longitudinal	cg20728768	272	-0.0307	[-0.344-0.282]	0.84757	0.9958	0.28495	0.05593	0.42144	OpenSea	chr5:142696594
		Cognition	Language	Longitudinal	cg25708981	272	0.1006	[-0.208-0.409]	0.52298	0.9434	0.81142	0.04619	0.93615	OpenSea	chr5:142697868
		Cognition	Language	Longitudinal	cg19645279	272	-0.0804	[-0.441-0.28]	0.66253	0.9816	0.50627	0.03156	0.23017	OpenSea	chr5:142702733
		Cognition	Language	Longitudinal	cg19176661	272	-0.4228	[-1.499-0.653]	0.44203	0.8299	0.90339	0.00908	0.09406	OpenSea	chr5:142718549
		Cognition	Language	Longitudinal	cg07715663	272	0.6202	[-0.778-2.019]	0.38561	0.8227	0.89993	0.0077	0.06068	OpenSea	chr5:142721796
		Cognition	Language	Longitudinal	cg24052866	272	0.155	[-0.156-0.466]	0.32914	0.7764	0.69336	0.03805	0.44354	OpenSea	chr5:142727470
		Cognition	Language	Longitudinal	cg22233604	272	-0.1115	[-0.665-0.442]	0.6935	0.9816	0.80239	0.02828	0.34628	OpenSea	chr5:142729377
		Cognition	Language	Longitudinal	cg03857453	272	0.019	[-0.308-0.346]	0.90933	0.9958	0.71757	0.04588	0.42058	OpenSea	chr5:142729913
		Cognition	Language	Longitudinal	cg15115787	272	-0.3069	[-0.704-0.09]	0.13116	0.6255	0.2334	0.0467	0.33835	OpenSea	chr5:142730701
		Cognition	Language	Longitudinal	cg12888360	272	0.2707	[-0.064-0.606]	0.11464	0.6204	0.19071	0.0335	0.21819	OpenSea	chr5:142732502
		Cognition	Language	Longitudinal	cg18484679	272	0.6409	[-0.121-1.403]	0.10048	0.6204	0.85401	0.0155	0.16305	OpenSea	chr5:142740314
		Cognition	Language	Longitudinal	cg16586394	272	0.9524	[-0.104-2.009]	0.07836	0.565	0.90913	0.01422	0.19939	OpenSea	chr5:142757011
		Cognition	Language	Longitudinal	cg25535999	272	-0.0028	[-1.041-1.036]	0.99581	0.9958	0.89419	0.01191	0.0902	OpenSea	chr5:142757312
		Cognition	Language	Longitudinal	cg03746860	272	0.6723	[-0.327-1.672]	0.18868	0.6676	0.89502	0.01114	0.14119	OpenSea	chr5:142759375
		Cognition	Language	Longitudinal	cg20598211	272	0.7753	[-0.419-1.97]	0.20446	0.6967	0.91627	0.01158	0.20941	OpenSea	chr5:142762454
		Cognition	Language	Longitudinal	cg05483455	272	2.0718	[0.401-3.742]	0.01577	0.3699	0.92855	0.00637	0.07369	OpenSea	chr5:142762613
		Cognition	Language	Longitudinal	cg16594263	272	-0.3303	[-1.862-1.202]	0.67302	0.9816	0.91923	0.01644	0.42455	OpenSea	chr5:142768048
		Cognition	Language	Longitudinal	cg16535116	272	0.1883	[-0.376-0.752]	0.51353	0.9434	0.82395	0.0209	0.17773	OpenSea	chr5:142769612
		Cognition	Language	Longitudinal	cg05900547	272	0.7429	[0.133-1.353]	0.01766	0.3699	0.82362	0.01868	0.15468	OpenSea	chr5:142769791
		Cognition	Language	Longitudinal	cg19432243	272	0.1216	[-0.082-0.325]	0.24252	0.7291	0.75237	0.06043	0.89556	OpenSea	chr5:142770757
		Cognition	Language	Longitudinal	cg19820298	272	0.1427	[-0.055-0.341]	0.15929	0.6255	0.78285	0.05639	0.30689	OpenSea	chr5:142770782
		Cognition	Language	Longitudinal	cg27107893	272	-0.0632	[-0.173-0.047]	0.26151	0.7291	0.79309	0.09578	0.9445	OpenSea	chr5:142776274
		Cognition	Language	Longitudinal	cg17342132	272	0.1234	[-0.413-0.66]	0.65246	0.9816	0.86999	0.03297	0.31216	N_Shore	chr5:142780254
		Cognition	Language	Longitudinal	cg07742588	272	0.2058	[-0.076-0.488]	0.15427	0.6255	0.78914	0.05595	0.91885	N_Shore	chr5:142780439
		Cognition	Language	Longitudinal	cg00294552	272	-0.0209	[-0.491-0.45]	0.93083	0.9958	0.84207	0.02221	0.20462	N_Shore	chr5:142780486
		Cognition	Language	Longitudinal	cg16219186	272	-0.0612	[-0.674-0.551]	0.8449	0.9958	0.88479	0.02148	0.22312	N_Shore	chr5:142780531
		Cognition	Language	Longitudinal	cg08845721	272	-0.3117	[-0.924-0.301]	0.31964	0.7739	0.90291	0.02257	0.35006	N_Shore	chr5:142780693
		Cognition	Language	Longitudinal	cg12969488	272	0.0089	[-0.319-0.337]	0.95761	0.9958	0.6959	0.03946	0.36342	N_Shore	chr5:142780984
		Cognition	Language	Longitudinal	cg07733851	272	0.1021	[-0.085-0.29]	0.28656	0.7376	0.31012	0.05444	0.48866	N_Shore	chr5:142781498
		Cognition	Language	Longitudinal	cg27122725	272	-0.8798	[-1.86-0.101]	0.07983	0.565	0.08247	0.03649	0.61758	N_Shore	chr5:142781723
		Cognition	Language	Longitudinal	cg06952416	272	0.0508	[-0.648-0.749]	0.88682	0.9958	0.10317	0.01595	0.14679	N_Shore	chr5:142781736
		Cognition	Language	Longitudinal	cg15910486	272	0.8191	[-0.086-1.725]	0.07746	0.565	0.06987	0.01223	0.07877	Island	chr5:142783621
		Cognition	Language	Longitudinal	cg01967637	272	0.0209	[-0.772-0.814]	0.95884	0.9958	0.05849	0.01419	0.08687	Island	chr5:142784019
		Cognition	Language	Longitudinal	cg26464411	272	0.2472	[-0.6-1.094]	0.56774	0.9816	0.0622	0.01192	0.08127	Island	chr5:142784222
		Cognition	Language	Longitudinal	cg06968181	272	-1.0525	[-3.101-0.996]	0.31478	0.7739	0.05291	0.02403	0.66787	Island	chr5:142784323
		Cognition	Language	Longitudinal	cg21702128	272	-1.2256	[-2.284--0.167]	0.02404	0.3699	0.08227	0.00965	0.07742	Island	chr5:142784721
		Cognition	Language	Longitudinal	cg18718518	272	0.0033	[-0.233-0.239]	0.97813	0.9958	0.53255	0.05217	0.3892	S_Shore	chr5:142785455
		Cognition	Language	Longitudinal	cg13764763	272	-0.244	[-0.442--0.046]	0.0166	0.3699	0.85356	0.05856	0.5219	S_Shore	chr5:142785501
		Cognition	Language	Longitudinal	cg16224829	272	0.0207	[-0.321-0.363]	0.90548	0.9958	0.79156	0.03531	0.28375	OpenSea	chr5:142792698
		Cognition	Language	Longitudinal	cg01751279	272	0.1675	[-0.239-0.574]	0.42027	0.8227	0.83882	0.03986	0.35649	OpenSea	chr5:142793924
		Cognition	Language	Longitudinal	cg23430507	272	-0.2149	[-0.716-0.286]	0.40104	0.8227	0.67871	0.03655	0.31636	OpenSea	chr5:142798375
		Cognition	Language	Longitudinal	cg17349736	272	0.5815	[-0.197-1.36]	0.14421	0.6255	0.8687	0.01502	0.1392	OpenSea	chr5:142802329
		Cognition	Language	Longitudinal	cg14438279	272	0.0133	[-0.366-0.393]	0.94516	0.9958	0.80706	0.05892	0.46785	OpenSea	chr5:142806343
		Cognition	Language	Longitudinal	cg08423118	272	-0.1462	[-0.304-0.012]	0.07096	0.565	0.77492	0.07191	0.32112	OpenSea	chr5:142808610
		Cognition	Language	Longitudinal	cg23776787	272	-1.2335	[-2.401--0.066]	0.03937	0.4527	0.05181	0.01906	0.42487	OpenSea	chr5:142814315
		Cognition	Language	Longitudinal	cg03906910	272	-0.2125	[-0.579-0.154]	0.25648	0.7291	0.22081	0.05239	0.37839	OpenSea	chr5:142814388
		Cognition	Language	Longitudinal	cg07589972	272	-0.234	[-1.632-1.164]	0.74311	0.9908	0.90005	0.01417	0.2547	OpenSea	chr5:142815463
		Cognition	Language	Longitudinal	cg12466613	272	0.3638	[-1.253-1.981]	0.65961	0.9816	0.91748	0.01192	0.24478	OpenSea	chr5:142815469
		Cognition	Language	Longitudinal	cg21979215	272	0.084	[-0.071-0.239]	0.28862	0.7376	0.76917	0.06877	0.39558	OpenSea	chr5:142815807
		Cognition	Language	Longitudinal	cg11022710	272	0.1081	[-0.739-0.956]	0.80269	0.9958	0.90751	0.01966	0.20763	OpenSea	chr5:142820479
		Cognition	Recognition	Cross-Sectional	cg23650353	303	-0.2065	[-8.03-7.617]	0.95879	0.995	0.92108	0.028	0.43394	OpenSea	chr4:148993643
		Cognition	Recognition	Cross-Sectional	cg19491599	303	0.2231	[-6.363-6.809]	0.94712	0.995	0.84529	0.0161	0.20857	OpenSea	chr4:149000607
		Cognition	Recognition	Cross-Sectional	cg10207656	303	5.6671	[-2.652-13.986]	0.1829	0.8659	0.90855	0.01373	0.20071	OpenSea	chr4:149019526
		Cognition	Recognition	Cross-Sectional	cg09143276	303	-2.114	[-6.562-2.334]	0.35234	0.9039	0.80845	0.02074	0.13091	OpenSea	chr4:149066518
		Cognition	Recognition	Cross-Sectional	cg13000004	303	-0.9449	[-9.362-7.472]	0.826	0.995	0.86983	0.01161	0.09813	OpenSea	chr4:149074093
		Cognition	Recognition	Cross-Sectional	cg10590842	303	-3.4502	[-12.63-5.73]	0.46193	0.9611	0.9034	0.01143	0.10122	OpenSea	chr4:149083955
		Cognition	Recognition	Cross-Sectional	cg21701890	303	0.0471	[-4.222-4.316]	0.98277	0.995	0.61622	0.02898	0.23369	OpenSea	chr4:149094632
		Cognition	Recognition	Cross-Sectional	cg27234800	303	-0.9668	[-2.563-0.629]	0.23611	0.9039	0.89127	0.0525	0.39493	OpenSea	chr4:149116611
		Cognition	Recognition	Cross-Sectional	cg25672354	303	0.0947	[-5.418-5.607]	0.97315	0.995	0.86697	0.01933	0.23574	OpenSea	chr4:149122383
		Cognition	Recognition	Cross-Sectional	cg10993059	303	-1.1171	[-9.467-7.233]	0.79334	0.995	0.892	0.014	0.24786	OpenSea	chr4:149123062
		Cognition	Recognition	Cross-Sectional	cg07335874	303	3.8649	[-4.727-12.457]	0.3787	0.9039	0.89734	0.01678	0.25463	OpenSea	chr4:149136507
		Cognition	Recognition	Cross-Sectional	cg08264907	303	-8.6693	[-20.322-2.983]	0.14588	0.8659	0.90365	0.00834	0.08404	OpenSea	chr4:149144045
		Cognition	Recognition	Cross-Sectional	cg07275757	303	-4.2218	[-13.006-4.562]	0.34699	0.9039	0.89578	0.01331	0.13086	OpenSea	chr4:149189974
		Cognition	Recognition	Cross-Sectional	cg13157799	303	11.2002	[2.307-20.094]	0.01416	0.6456	0.05908	0.01227	0.14832	OpenSea	chr4:149191991
		Cognition	Recognition	Cross-Sectional	cg00328411	303	-1.3355	[-13.207-10.536]	0.82565	0.995	0.90656	0.00839	0.10838	OpenSea	chr4:149205617
		Cognition	Recognition	Cross-Sectional	cg02471166	303	2.4268	[-1.519-6.373]	0.22903	0.9039	0.62905	0.02431	0.28086	OpenSea	chr4:149244985
		Cognition	Recognition	Cross-Sectional	cg27225476	303	-1.6664	[-7.408-4.076]	0.56992	0.9727	0.85878	0.01502	0.11725	OpenSea	chr4:149275542
		Cognition	Recognition	Cross-Sectional	cg06240648	303	-2.6513	[-13.693-8.391]	0.63827	0.9787	0.90857	0.00875	0.08216	OpenSea	chr4:149289762
		Cognition	Recognition	Cross-Sectional	cg04867484	303	-1.4041	[-6.599-3.791]	0.5967	0.9787	0.06179	0.03171	0.6046	OpenSea	chr4:149297469
		Cognition	Recognition	Cross-Sectional	cg19496136	303	0.3067	[-2.149-2.762]	0.80679	0.995	0.74636	0.06158	0.84904	OpenSea	chr4:149336765
		Cognition	Recognition	Cross-Sectional	cg17253842	303	3.2566	[-3.046-9.56]	0.31208	0.9039	0.87057	0.02004	0.40157	OpenSea	chr4:149347991
		Cognition	Recognition	Cross-Sectional	cg19650300	303	0.568	[-7.199-8.335]	0.88613	0.995	0.87161	0.0124	0.12937	OpenSea	chr4:149357960
		Cognition	Recognition	Cross-Sectional	cg09238384	303	-1.0081	[-9.3-7.284]	0.81183	0.995	0.88033	0.01059	0.10479	OpenSea	chr4:149358199
		Cognition	Recognition	Cross-Sectional	cg07651033	303	3.3159	[-3.044-9.676]	0.30768	0.9039	0.891	0.01412	0.08448	OpenSea	chr4:149359043
		Cognition	Recognition	Cross-Sectional	cg23329208	303	-6.3982	[-15.306-2.509]	0.16026	0.8659	0.89218	0.01003	0.08891	N_Shelf	chr4:149360981
		Cognition	Recognition	Cross-Sectional	cg05437692	303	1.1323	[-2.122-4.386]	0.49574	0.9611	0.28837	0.04393	0.32226	N_Shore	chr4:149362435
		Cognition	Recognition	Cross-Sectional	cg27460943	303	2.6477	[-2.671-7.966]	0.33003	0.9039	0.08292	0.02603	0.31306	N_Shore	chr4:149362809
		Cognition	Recognition	Cross-Sectional	cg01576854	303	2.4203	[-7.071-11.912]	0.61761	0.9787	0.07386	0.01207	0.20464	Island	chr4:149363450
		Cognition	Recognition	Cross-Sectional	cg13996731	303	-1.2714	[-11.406-8.863]	0.80595	0.995	0.05943	0.00984	0.12921	Island	chr4:149363522
		Cognition	Recognition	Cross-Sectional	cg20140452	303	2.6502	[-6.763-12.063]	0.58149	0.9727	0.07045	0.00971	0.0619	Island	chr4:149363715
		Cognition	Recognition	Cross-Sectional	cg10621979	303	-3.4611	[-13.146-6.223]	0.4842	0.9611	0.05355	0.018	0.29521	Island	chr4:149365824
		Cognition	Recognition	Cross-Sectional	cg11239219	303	3.7426	[-5.198-12.683]	0.41263	0.9039	0.05479	0.02153	0.3658	Island	chr4:149365887
		Cognition	Recognition	Cross-Sectional	cg10002915	303	-0.0963	[-1.249-1.056]	0.87003	0.995	0.54242	0.08455	0.73095	S_Shelf	chr4:149369175
		Cognition	Recognition	Cross-Sectional	cg15374100	303	-4.7607	[-12.612-3.091]	0.23565	0.9039	0.86961	0.01354	0.2065	OpenSea	chr5:142651239
		Cognition	Recognition	Cross-Sectional	cg15740681	303	-0.3215	[-10.961-10.318]	0.95281	0.995	0.89095	0.00925	0.09622	OpenSea	chr5:142653066
		Cognition	Recognition	Cross-Sectional	cg26081259	303	5.159	[-6.946-17.264]	0.40422	0.9039	0.92585	0.00714	0.05144	OpenSea	chr5:142659682
		Cognition	Recognition	Cross-Sectional	cg13514002	303	-2.8235	[-11.463-5.816]	0.52232	0.9611	0.9104	0.01216	0.16497	OpenSea	chr5:142677292
		Cognition	Recognition	Cross-Sectional	cg24801588	303	-8.6017	[-16.923--0.281]	0.04368	0.6456	0.87613	0.01121	0.08119	OpenSea	chr5:142689858
		Cognition	Recognition	Cross-Sectional	cg00407401	303	-1.9053	[-10.971-7.16]	0.68071	0.995	0.88336	0.0113	0.12225	OpenSea	chr5:142690959
		Cognition	Recognition	Cross-Sectional	cg19457823	303	1.7905	[-0.245-3.826]	0.08575	0.7172	0.85324	0.04572	0.44993	OpenSea	chr5:142692961
		Cognition	Recognition	Cross-Sectional	cg12741214	303	-10.7832	[-22.655-1.088]	0.07609	0.7	0.92153	0.00739	0.05446	OpenSea	chr5:142695619
		Cognition	Recognition	Cross-Sectional	cg04457787	303	8.0297	[-2.901-18.96]	0.15101	0.8659	0.91851	0.00864	0.10367	OpenSea	chr5:142695636
		Cognition	Recognition	Cross-Sectional	cg20728768	303	1.263	[-1.457-3.983]	0.36355	0.9039	0.28495	0.05593	0.42144	OpenSea	chr5:142696594
		Cognition	Recognition	Cross-Sectional	cg25708981	303	0.3482	[-2.259-2.955]	0.79371	0.995	0.81142	0.04619	0.93615	OpenSea	chr5:142697868
		Cognition	Recognition	Cross-Sectional	cg19645279	303	1.4792	[-1.508-4.467]	0.33267	0.9039	0.50627	0.03156	0.23017	OpenSea	chr5:142702733
		Cognition	Recognition	Cross-Sectional	cg19176661	303	-0.9182	[-10.164-8.327]	0.84581	0.995	0.90339	0.00908	0.09406	OpenSea	chr5:142718549
		Cognition	Recognition	Cross-Sectional	cg07715663	303	-1.4968	[-13.488-10.494]	0.8069	0.995	0.89993	0.0077	0.06068	OpenSea	chr5:142721796
		Cognition	Recognition	Cross-Sectional	cg24052866	303	0.6614	[-2.031-3.353]	0.63049	0.9787	0.69336	0.03805	0.44354	OpenSea	chr5:142727470
		Cognition	Recognition	Cross-Sectional	cg22233604	303	1.5419	[-3.131-6.214]	0.5183	0.9611	0.80239	0.02828	0.34628	OpenSea	chr5:142729377
		Cognition	Recognition	Cross-Sectional	cg03857453	303	1.3177	[-1.479-4.114]	0.35654	0.9039	0.71757	0.04588	0.42058	OpenSea	chr5:142729913
		Cognition	Recognition	Cross-Sectional	cg15115787	303	1.5599	[-1.844-4.964]	0.36991	0.9039	0.2334	0.0467	0.33835	OpenSea	chr5:142730701
		Cognition	Recognition	Cross-Sectional	cg12888360	303	3.3301	[0.432-6.228]	0.02509	0.6456	0.19071	0.0335	0.21819	OpenSea	chr5:142732502
		Cognition	Recognition	Cross-Sectional	cg18484679	303	-6.3927	[-12.734--0.052]	0.04912	0.6456	0.85401	0.0155	0.16305	OpenSea	chr5:142740314
		Cognition	Recognition	Cross-Sectional	cg16586394	303	9.1818	[0.127-18.236]	0.04781	0.6456	0.90913	0.01422	0.19939	OpenSea	chr5:142757011
		Cognition	Recognition	Cross-Sectional	cg25535999	303	-0.9289	[-9.64-7.782]	0.83459	0.995	0.89419	0.01191	0.0902	OpenSea	chr5:142757312
		Cognition	Recognition	Cross-Sectional	cg03746860	303	-6.008	[-14.67-2.654]	0.17508	0.8659	0.89502	0.01114	0.14119	OpenSea	chr5:142759375
		Cognition	Recognition	Cross-Sectional	cg20598211	303	-8.4895	[-18.612-1.633]	0.10131	0.7507	0.91627	0.01158	0.20941	OpenSea	chr5:142762454
		Cognition	Recognition	Cross-Sectional	cg05483455	303	-3.7823	[-16.906-9.342]	0.57261	0.9727	0.92855	0.00637	0.07369	OpenSea	chr5:142762613
		Cognition	Recognition	Cross-Sectional	cg16594263	303	-6.4619	[-19.724-6.8]	0.34038	0.9039	0.91923	0.01644	0.42455	OpenSea	chr5:142768048
		Cognition	Recognition	Cross-Sectional	cg16535116	303	-1.4037	[-6.226-3.419]	0.56877	0.9727	0.82395	0.0209	0.17773	OpenSea	chr5:142769612
		Cognition	Recognition	Cross-Sectional	cg05900547	303	-1.9378	[-7.212-3.336]	0.47199	0.9611	0.82362	0.01868	0.15468	OpenSea	chr5:142769791
		Cognition	Recognition	Cross-Sectional	cg19432243	303	0.0177	[-1.73-1.766]	0.98416	0.995	0.75237	0.06043	0.89556	OpenSea	chr5:142770757
		Cognition	Recognition	Cross-Sectional	cg19820298	303	0.0748	[-1.615-1.764]	0.93091	0.995	0.78285	0.05639	0.30689	OpenSea	chr5:142770782
		Cognition	Recognition	Cross-Sectional	cg27107893	303	-0.3055	[-1.228-0.617]	0.51686	0.9611	0.79309	0.09578	0.9445	OpenSea	chr5:142776274
		Cognition	Recognition	Cross-Sectional	cg17342132	303	-1.9782	[-6.63-2.673]	0.40525	0.9039	0.86999	0.03297	0.31216	N_Shore	chr5:142780254
		Cognition	Recognition	Cross-Sectional	cg07742588	303	-3.6399	[-6.079--1.201]	0.00372	0.3425	0.78914	0.05595	0.91885	N_Shore	chr5:142780439
		Cognition	Recognition	Cross-Sectional	cg00294552	303	1.5671	[-2.537-5.672]	0.45486	0.9611	0.84207	0.02221	0.20462	N_Shore	chr5:142780486
		Cognition	Recognition	Cross-Sectional	cg16219186	303	-3.5629	[-8.857-1.732]	0.18824	0.8659	0.88479	0.02148	0.22312	N_Shore	chr5:142780531
		Cognition	Recognition	Cross-Sectional	cg08845721	303	-0.5254	[-5.766-4.715]	0.84437	0.995	0.90291	0.02257	0.35006	N_Shore	chr5:142780693
		Cognition	Recognition	Cross-Sectional	cg12969488	303	0.2239	[-2.596-3.043]	0.87645	0.995	0.6959	0.03946	0.36342	N_Shore	chr5:142780984
		Cognition	Recognition	Cross-Sectional	cg07733851	303	0.714	[-0.908-2.336]	0.38896	0.9039	0.31012	0.05444	0.48866	N_Shore	chr5:142781498
		Cognition	Recognition	Cross-Sectional	cg27122725	303	0.707	[-7.887-9.301]	0.87202	0.995	0.08247	0.03649	0.61758	N_Shore	chr5:142781723
		Cognition	Recognition	Cross-Sectional	cg06952416	303	-0.4092	[-6.385-5.567]	0.89334	0.995	0.10317	0.01595	0.14679	N_Shore	chr5:142781736
		Cognition	Recognition	Cross-Sectional	cg15910486	303	1.5942	[-6.278-9.467]	0.69174	0.995	0.06987	0.01223	0.07877	Island	chr5:142783621
		Cognition	Recognition	Cross-Sectional	cg01967637	303	-4.0969	[-10.76-2.566]	0.22912	0.9039	0.05849	0.01419	0.08687	Island	chr5:142784019
		Cognition	Recognition	Cross-Sectional	cg26464411	303	4.0753	[-3.139-11.29]	0.26917	0.9039	0.0622	0.01192	0.08127	Island	chr5:142784222
		Cognition	Recognition	Cross-Sectional	cg06968181	303	-0.831	[-18.136-16.475]	0.92509	0.995	0.05291	0.02403	0.66787	Island	chr5:142784323
		Cognition	Recognition	Cross-Sectional	cg21702128	303	2.257	[-7.064-11.578]	0.63545	0.9787	0.08227	0.00965	0.07742	Island	chr5:142784721
		Cognition	Recognition	Cross-Sectional	cg18718518	303	-1.8778	[-3.824-0.068]	0.05961	0.6855	0.53255	0.05217	0.3892	S_Shore	chr5:142785455
		Cognition	Recognition	Cross-Sectional	cg13764763	303	1.7471	[0.076-3.419]	0.04142	0.6456	0.85356	0.05856	0.5219	S_Shore	chr5:142785501
		Cognition	Recognition	Cross-Sectional	cg16224829	303	2.6532	[-0.213-5.52]	0.0707	0.7	0.79156	0.03531	0.28375	OpenSea	chr5:142792698
		Cognition	Recognition	Cross-Sectional	cg01751279	303	0.7518	[-2.765-4.269]	0.67551	0.995	0.83882	0.03986	0.35649	OpenSea	chr5:142793924
		Cognition	Recognition	Cross-Sectional	cg23430507	303	-0.1559	[-4.381-4.069]	0.94238	0.995	0.67871	0.03655	0.31636	OpenSea	chr5:142798375
		Cognition	Recognition	Cross-Sectional	cg17349736	303	-2.9296	[-9.494-3.635]	0.38246	0.9039	0.8687	0.01502	0.1392	OpenSea	chr5:142802329
		Cognition	Recognition	Cross-Sectional	cg14438279	303	1.0181	[-2.211-4.247]	0.53703	0.9688	0.80706	0.05892	0.46785	OpenSea	chr5:142806343
		Cognition	Recognition	Cross-Sectional	cg08423118	303	-0.6744	[-2.041-0.692]	0.33425	0.9039	0.77492	0.07191	0.32112	OpenSea	chr5:142808610
		Cognition	Recognition	Cross-Sectional	cg23776787	303	7.5666	[-2.174-17.308]	0.129	0.8477	0.05181	0.01906	0.42487	OpenSea	chr5:142814315
		Cognition	Recognition	Cross-Sectional	cg03906910	303	2.4716	[-0.517-5.46]	0.10608	0.7507	0.22081	0.05239	0.37839	OpenSea	chr5:142814388
		Cognition	Recognition	Cross-Sectional	cg07589972	303	-1.435	[-13.567-10.697]	0.81683	0.995	0.90005	0.01417	0.2547	OpenSea	chr5:142815463
		Cognition	Recognition	Cross-Sectional	cg12466613	303	-0.037	[-14.12-14.046]	0.99589	0.9959	0.91748	0.01192	0.24478	OpenSea	chr5:142815469
		Cognition	Recognition	Cross-Sectional	cg21979215	303	0.2511	[-1.053-1.555]	0.70622	0.995	0.76917	0.06877	0.39558	OpenSea	chr5:142815807
		Cognition	Recognition	Cross-Sectional	cg11022710	303	-0.4213	[-7.55-6.708]	0.90787	0.995	0.90751	0.01966	0.20763	OpenSea	chr5:142820479
		Cognition	Recognition	Longitudinal	cg23650353	272	-0.1338	[-0.361-0.094]	0.25016	0.9871	0.92108	0.028	0.43394	OpenSea	chr4:148993643
		Cognition	Recognition	Longitudinal	cg19491599	272	0.0781	[-0.117-0.273]	0.43246	0.9871	0.84529	0.0161	0.20857	OpenSea	chr4:149000607
		Cognition	Recognition	Longitudinal	cg10207656	272	-0.0876	[-0.334-0.159]	0.48712	0.9871	0.90855	0.01373	0.20071	OpenSea	chr4:149019526
		Cognition	Recognition	Longitudinal	cg09143276	272	0.0279	[-0.102-0.157]	0.67369	0.9871	0.80845	0.02074	0.13091	OpenSea	chr4:149066518
		Cognition	Recognition	Longitudinal	cg13000004	272	-0.0952	[-0.347-0.156]	0.45892	0.9871	0.86983	0.01161	0.09813	OpenSea	chr4:149074093
		Cognition	Recognition	Longitudinal	cg10590842	272	-0.2114	[-0.481-0.058]	0.12595	0.9871	0.9034	0.01143	0.10122	OpenSea	chr4:149083955
		Cognition	Recognition	Longitudinal	cg21701890	272	0.0088	[-0.118-0.136]	0.89249	0.9881	0.61622	0.02898	0.23369	OpenSea	chr4:149094632
		Cognition	Recognition	Longitudinal	cg27234800	272	0.0121	[-0.033-0.057]	0.60218	0.9871	0.89127	0.0525	0.39493	OpenSea	chr4:149116611
		Cognition	Recognition	Longitudinal	cg25672354	272	-0.0633	[-0.224-0.097]	0.44127	0.9871	0.86697	0.01933	0.23574	OpenSea	chr4:149122383
		Cognition	Recognition	Longitudinal	cg10993059	272	0.064	[-0.193-0.321]	0.6257	0.9871	0.892	0.014	0.24786	OpenSea	chr4:149123062
		Cognition	Recognition	Longitudinal	cg07335874	272	-0.0922	[-0.358-0.173]	0.49675	0.9871	0.89734	0.01678	0.25463	OpenSea	chr4:149136507
		Cognition	Recognition	Longitudinal	cg08264907	272	0.1399	[-0.203-0.483]	0.42492	0.9871	0.90365	0.00834	0.08404	OpenSea	chr4:149144045
		Cognition	Recognition	Longitudinal	cg07275757	272	0.2867	[0.023-0.55]	0.03388	0.8704	0.89578	0.01331	0.13086	OpenSea	chr4:149189974
		Cognition	Recognition	Longitudinal	cg13157799	272	0.0996	[-0.175-0.374]	0.47761	0.9871	0.05908	0.01227	0.14832	OpenSea	chr4:149191991
		Cognition	Recognition	Longitudinal	cg00328411	272	-0.1581	[-0.506-0.19]	0.37361	0.9871	0.90656	0.00839	0.10838	OpenSea	chr4:149205617
		Cognition	Recognition	Longitudinal	cg02471166	272	-0.0468	[-0.164-0.071]	0.43542	0.9871	0.62905	0.02431	0.28086	OpenSea	chr4:149244985
		Cognition	Recognition	Longitudinal	cg27225476	272	0.0899	[-0.08-0.26]	0.30069	0.9871	0.85878	0.01502	0.11725	OpenSea	chr4:149275542
		Cognition	Recognition	Longitudinal	cg06240648	272	0.0508	[-0.276-0.378]	0.76076	0.9871	0.90857	0.00875	0.08216	OpenSea	chr4:149289762
		Cognition	Recognition	Longitudinal	cg04867484	272	-0.0018	[-0.155-0.151]	0.98123	0.9881	0.06179	0.03171	0.6046	OpenSea	chr4:149297469
		Cognition	Recognition	Longitudinal	cg19496136	272	0.0163	[-0.055-0.088]	0.65449	0.9871	0.74636	0.06158	0.84904	OpenSea	chr4:149336765
		Cognition	Recognition	Longitudinal	cg17253842	272	-0.086	[-0.273-0.101]	0.36807	0.9871	0.87057	0.02004	0.40157	OpenSea	chr4:149347991
		Cognition	Recognition	Longitudinal	cg19650300	272	-0.0264	[-0.252-0.199]	0.81855	0.9871	0.87161	0.0124	0.12937	OpenSea	chr4:149357960
		Cognition	Recognition	Longitudinal	cg09238384	272	0.1569	[-0.085-0.398]	0.20404	0.9871	0.88033	0.01059	0.10479	OpenSea	chr4:149358199
		Cognition	Recognition	Longitudinal	cg07651033	272	-0.0989	[-0.286-0.089]	0.3023	0.9871	0.891	0.01412	0.08448	OpenSea	chr4:149359043
		Cognition	Recognition	Longitudinal	cg23329208	272	0.0572	[-0.21-0.324]	0.67467	0.9871	0.89218	0.01003	0.08891	N_Shelf	chr4:149360981
		Cognition	Recognition	Longitudinal	cg05437692	272	0.0389	[-0.056-0.134]	0.42306	0.9871	0.28837	0.04393	0.32226	N_Shore	chr4:149362435
		Cognition	Recognition	Longitudinal	cg27460943	272	-0.0398	[-0.201-0.121]	0.62858	0.9871	0.08292	0.02603	0.31306	N_Shore	chr4:149362809
		Cognition	Recognition	Longitudinal	cg01576854	272	-0.1317	[-0.407-0.143]	0.34862	0.9871	0.07386	0.01207	0.20464	Island	chr4:149363450
		Cognition	Recognition	Longitudinal	cg13996731	272	0.0289	[-0.269-0.327]	0.84958	0.9871	0.05943	0.00984	0.12921	Island	chr4:149363522
		Cognition	Recognition	Longitudinal	cg20140452	272	0.0789	[-0.197-0.355]	0.57611	0.9871	0.07045	0.00971	0.0619	Island	chr4:149363715
		Cognition	Recognition	Longitudinal	cg10621979	272	0.0027	[-0.282-0.288]	0.98527	0.9881	0.05355	0.018	0.29521	Island	chr4:149365824
		Cognition	Recognition	Longitudinal	cg11239219	272	-0.0127	[-0.276-0.251]	0.92473	0.9881	0.05479	0.02153	0.3658	Island	chr4:149365887
		Cognition	Recognition	Longitudinal	cg10002915	272	0.004	[-0.03-0.038]	0.81859	0.9871	0.54242	0.08455	0.73095	S_Shelf	chr4:149369175
		Cognition	Recognition	Longitudinal	cg15374100	272	0.1366	[-0.105-0.378]	0.26955	0.9871	0.86961	0.01354	0.2065	OpenSea	chr5:142651239
		Cognition	Recognition	Longitudinal	cg15740681	272	0.056	[-0.261-0.373]	0.72966	0.9871	0.89095	0.00925	0.09622	OpenSea	chr5:142653066
		Cognition	Recognition	Longitudinal	cg26081259	272	0.2364	[-0.12-0.592]	0.19421	0.9871	0.92585	0.00714	0.05144	OpenSea	chr5:142659682
		Cognition	Recognition	Longitudinal	cg13514002	272	0.0504	[-0.203-0.304]	0.69704	0.9871	0.9104	0.01216	0.16497	OpenSea	chr5:142677292
		Cognition	Recognition	Longitudinal	cg24801588	272	0.0429	[-0.205-0.291]	0.73464	0.9871	0.87613	0.01121	0.08119	OpenSea	chr5:142689858
		Cognition	Recognition	Longitudinal	cg00407401	272	-0.0803	[-0.356-0.196]	0.56898	0.9871	0.88336	0.0113	0.12225	OpenSea	chr5:142690959
		Cognition	Recognition	Longitudinal	cg19457823	272	0.0012	[-0.057-0.059]	0.96891	0.9881	0.85324	0.04572	0.44993	OpenSea	chr5:142692961
		Cognition	Recognition	Longitudinal	cg12741214	272	0.3122	[-0.037-0.661]	0.081	0.9871	0.92153	0.00739	0.05446	OpenSea	chr5:142695619
		Cognition	Recognition	Longitudinal	cg04457787	272	0.0815	[-0.248-0.411]	0.62782	0.9871	0.91851	0.00864	0.10367	OpenSea	chr5:142695636
		Cognition	Recognition	Longitudinal	cg20728768	272	0.0125	[-0.067-0.092]	0.75826	0.9871	0.28495	0.05593	0.42144	OpenSea	chr5:142696594
		Cognition	Recognition	Longitudinal	cg25708981	272	-0.0213	[-0.099-0.056]	0.59072	0.9871	0.81142	0.04619	0.93615	OpenSea	chr5:142697868
		Cognition	Recognition	Longitudinal	cg19645279	272	0.0138	[-0.077-0.105]	0.76761	0.9871	0.50627	0.03156	0.23017	OpenSea	chr5:142702733
		Cognition	Recognition	Longitudinal	cg19176661	272	0.0724	[-0.2-0.345]	0.6025	0.9871	0.90339	0.00908	0.09406	OpenSea	chr5:142718549
		Cognition	Recognition	Longitudinal	cg07715663	272	-0.0426	[-0.397-0.312]	0.81433	0.9871	0.89993	0.0077	0.06068	OpenSea	chr5:142721796
		Cognition	Recognition	Longitudinal	cg24052866	272	0.0052	[-0.074-0.084]	0.8972	0.9881	0.69336	0.03805	0.44354	OpenSea	chr5:142727470
		Cognition	Recognition	Longitudinal	cg22233604	272	0.0346	[-0.106-0.176]	0.6308	0.9871	0.80239	0.02828	0.34628	OpenSea	chr5:142729377
		Cognition	Recognition	Longitudinal	cg03857453	272	0.0244	[-0.059-0.108]	0.56673	0.9871	0.71757	0.04588	0.42058	OpenSea	chr5:142729913
		Cognition	Recognition	Longitudinal	cg15115787	272	0.0206	[-0.08-0.122]	0.68981	0.9871	0.2334	0.0467	0.33835	OpenSea	chr5:142730701
		Cognition	Recognition	Longitudinal	cg12888360	272	-0.0028	[-0.088-0.083]	0.94983	0.9881	0.19071	0.0335	0.21819	OpenSea	chr5:142732502
		Cognition	Recognition	Longitudinal	cg18484679	272	0.0071	[-0.187-0.202]	0.94261	0.9881	0.85401	0.0155	0.16305	OpenSea	chr5:142740314
		Cognition	Recognition	Longitudinal	cg16586394	272	0.0538	[-0.222-0.329]	0.70232	0.9871	0.90913	0.01422	0.19939	OpenSea	chr5:142757011
		Cognition	Recognition	Longitudinal	cg25535999	272	-0.0257	[-0.289-0.237]	0.84793	0.9871	0.89419	0.01191	0.0902	OpenSea	chr5:142757312
		Cognition	Recognition	Longitudinal	cg03746860	272	-0.0218	[-0.276-0.232]	0.86681	0.9871	0.89502	0.01114	0.14119	OpenSea	chr5:142759375
		Cognition	Recognition	Longitudinal	cg20598211	272	0.23	[-0.073-0.533]	0.13779	0.9871	0.91627	0.01158	0.20941	OpenSea	chr5:142762454
		Cognition	Recognition	Longitudinal	cg05483455	272	0.2282	[-0.199-0.655]	0.29607	0.9871	0.92855	0.00637	0.07369	OpenSea	chr5:142762613
		Cognition	Recognition	Longitudinal	cg16594263	272	0.094	[-0.296-0.484]	0.63699	0.9871	0.91923	0.01644	0.42455	OpenSea	chr5:142768048
		Cognition	Recognition	Longitudinal	cg16535116	272	0.1305	[-0.011-0.272]	0.07196	0.9871	0.82395	0.0209	0.17773	OpenSea	chr5:142769612
		Cognition	Recognition	Longitudinal	cg05900547	272	0.0363	[-0.12-0.192]	0.6492	0.9871	0.82362	0.01868	0.15468	OpenSea	chr5:142769791
		Cognition	Recognition	Longitudinal	cg19432243	272	0.0083	[-0.043-0.06]	0.75181	0.9871	0.75237	0.06043	0.89556	OpenSea	chr5:142770757
		Cognition	Recognition	Longitudinal	cg19820298	272	0.0175	[-0.033-0.068]	0.4954	0.9871	0.78285	0.05639	0.30689	OpenSea	chr5:142770782
		Cognition	Recognition	Longitudinal	cg27107893	272	-0.0058	[-0.033-0.022]	0.6848	0.9871	0.79309	0.09578	0.9445	OpenSea	chr5:142776274
		Cognition	Recognition	Longitudinal	cg17342132	272	0.001	[-0.135-0.137]	0.98805	0.9881	0.86999	0.03297	0.31216	N_Shore	chr5:142780254
		Cognition	Recognition	Longitudinal	cg07742588	272	0.0859	[0.015-0.157]	0.01884	0.8666	0.78914	0.05595	0.91885	N_Shore	chr5:142780439
		Cognition	Recognition	Longitudinal	cg00294552	272	-0.1258	[-0.244--0.008]	0.03784	0.8704	0.84207	0.02221	0.20462	N_Shore	chr5:142780486
		Cognition	Recognition	Longitudinal	cg16219186	272	0.1055	[-0.049-0.26]	0.18247	0.9871	0.88479	0.02148	0.22312	N_Shore	chr5:142780531
		Cognition	Recognition	Longitudinal	cg08845721	272	-0.017	[-0.173-0.139]	0.83035	0.9871	0.90291	0.02257	0.35006	N_Shore	chr5:142780693
		Cognition	Recognition	Longitudinal	cg12969488	272	-0.0401	[-0.123-0.043]	0.34345	0.9871	0.6959	0.03946	0.36342	N_Shore	chr5:142780984
		Cognition	Recognition	Longitudinal	cg07733851	272	0.0055	[-0.042-0.053]	0.81959	0.9871	0.31012	0.05444	0.48866	N_Shore	chr5:142781498
		Cognition	Recognition	Longitudinal	cg27122725	272	-0.1754	[-0.424-0.073]	0.16761	0.9871	0.08247	0.03649	0.61758	N_Shore	chr5:142781723
		Cognition	Recognition	Longitudinal	cg06952416	272	0.0585	[-0.117-0.234]	0.51525	0.9871	0.10317	0.01595	0.14679	N_Shore	chr5:142781736
		Cognition	Recognition	Longitudinal	cg15910486	272	0.1405	[-0.091-0.372]	0.23432	0.9871	0.06987	0.01223	0.07877	Island	chr5:142783621
		Cognition	Recognition	Longitudinal	cg01967637	272	0.0722	[-0.129-0.273]	0.48159	0.9871	0.05849	0.01419	0.08687	Island	chr5:142784019
		Cognition	Recognition	Longitudinal	cg26464411	272	0.0705	[-0.144-0.285]	0.51964	0.9871	0.0622	0.01192	0.08127	Island	chr5:142784222
		Cognition	Recognition	Longitudinal	cg06968181	272	0.0435	[-0.473-0.56]	0.86908	0.9871	0.05291	0.02403	0.66787	Island	chr5:142784323
		Cognition	Recognition	Longitudinal	cg21702128	272	-0.1045	[-0.374-0.165]	0.4482	0.9871	0.08227	0.00965	0.07742	Island	chr5:142784721
		Cognition	Recognition	Longitudinal	cg18718518	272	-0.0147	[-0.075-0.045]	0.63143	0.9871	0.53255	0.05217	0.3892	S_Shore	chr5:142785455
		Cognition	Recognition	Longitudinal	cg13764763	272	-0.0449	[-0.095-0.006]	0.08245	0.9871	0.85356	0.05856	0.5219	S_Shore	chr5:142785501
		Cognition	Recognition	Longitudinal	cg16224829	272	-0.0469	[-0.133-0.04]	0.28924	0.9871	0.79156	0.03531	0.28375	OpenSea	chr5:142792698
		Cognition	Recognition	Longitudinal	cg01751279	272	-0.0238	[-0.127-0.079]	0.65136	0.9871	0.83882	0.03986	0.35649	OpenSea	chr5:142793924
		Cognition	Recognition	Longitudinal	cg23430507	272	-0.091	[-0.218-0.036]	0.16103	0.9871	0.67871	0.03655	0.31636	OpenSea	chr5:142798375
		Cognition	Recognition	Longitudinal	cg17349736	272	0.1317	[-0.065-0.329]	0.19142	0.9871	0.8687	0.01502	0.1392	OpenSea	chr5:142802329
		Cognition	Recognition	Longitudinal	cg14438279	272	0.0009	[-0.095-0.097]	0.98553	0.9881	0.80706	0.05892	0.46785	OpenSea	chr5:142806343
		Cognition	Recognition	Longitudinal	cg08423118	272	0.0109	[-0.029-0.051]	0.5966	0.9871	0.77492	0.07191	0.32112	OpenSea	chr5:142808610
		Cognition	Recognition	Longitudinal	cg23776787	272	-0.4018	[-0.692--0.112]	0.00711	0.6538	0.05181	0.01906	0.42487	OpenSea	chr5:142814315
		Cognition	Recognition	Longitudinal	cg03906910	272	-0.0084	[-0.102-0.085]	0.85997	0.9871	0.22081	0.05239	0.37839	OpenSea	chr5:142814388
		Cognition	Recognition	Longitudinal	cg07589972	272	-0.2509	[-0.603-0.101]	0.16367	0.9871	0.90005	0.01417	0.2547	OpenSea	chr5:142815463
		Cognition	Recognition	Longitudinal	cg12466613	272	-0.125	[-0.535-0.285]	0.55031	0.9871	0.91748	0.01192	0.24478	OpenSea	chr5:142815469
		Cognition	Recognition	Longitudinal	cg21979215	272	-0.0058	[-0.045-0.033]	0.77112	0.9871	0.76917	0.06877	0.39558	OpenSea	chr5:142815807
		Cognition	Recognition	Longitudinal	cg11022710	272	-0.0095	[-0.224-0.205]	0.93116	0.9881	0.90751	0.01966	0.20763	OpenSea	chr5:142820479
		Brain Imaging	Aβ Burden	Cross-Sectional	cg23650353	305	-196.043	[-520.181-128.094]	0.23681	0.8311	0.92108	0.028	0.43394	OpenSea	chr4:148993643
		Brain Imaging	Aβ Burden	Cross-Sectional	cg19491599	305	-6.4001	[-279.574-266.774]	0.96341	0.9962	0.84529	0.0161	0.20857	OpenSea	chr4:149000607
		Brain Imaging	Aβ Burden	Cross-Sectional	cg10207656	305	-40.8225	[-386.112-304.467]	0.81692	0.9962	0.90855	0.01373	0.20071	OpenSea	chr4:149019526
		Brain Imaging	Aβ Burden	Cross-Sectional	cg09143276	305	-27.292	[-211.002-156.418]	0.77112	0.9962	0.80845	0.02074	0.13091	OpenSea	chr4:149066518
		Brain Imaging	Aβ Burden	Cross-Sectional	cg13000004	305	-39.5994	[-385.049-305.85]	0.82239	0.9962	0.86983	0.01161	0.09813	OpenSea	chr4:149074093
		Brain Imaging	Aβ Burden	Cross-Sectional	cg10590842	305	122.626	[-257.989-503.242]	0.52823	0.925	0.9034	0.01143	0.10122	OpenSea	chr4:149083955
		Brain Imaging	Aβ Burden	Cross-Sectional	cg21701890	305	-58.2641	[-234.631-118.103]	0.51782	0.925	0.61622	0.02898	0.23369	OpenSea	chr4:149094632
		Brain Imaging	Aβ Burden	Cross-Sectional	cg27234800	305	43.8933	[-21.888-109.675]	0.19197	0.8311	0.89127	0.0525	0.39493	OpenSea	chr4:149116611
		Brain Imaging	Aβ Burden	Cross-Sectional	cg25672354	305	-62.865	[-291.318-165.588]	0.59006	0.965	0.86697	0.01933	0.23574	OpenSea	chr4:149122383
		Brain Imaging	Aβ Burden	Cross-Sectional	cg10993059	305	-249.529	[-592.565-93.508]	0.15502	0.8311	0.892	0.014	0.24786	OpenSea	chr4:149123062
		Brain Imaging	Aβ Burden	Cross-Sectional	cg07335874	305	129.516	[-225.164-484.197]	0.47474	0.925	0.89734	0.01678	0.25463	OpenSea	chr4:149136507
		Brain Imaging	Aβ Burden	Cross-Sectional	cg08264907	305	161.84	[-317.05-640.731]	0.50825	0.925	0.90365	0.00834	0.08404	OpenSea	chr4:149144045
		Brain Imaging	Aβ Burden	Cross-Sectional	cg07275757	305	-135.282	[-497.959-227.394]	0.46531	0.925	0.89578	0.01331	0.13086	OpenSea	chr4:149189974
		Brain Imaging	Aβ Burden	Cross-Sectional	cg13157799	305	-4.9572	[-375.996-366.081]	0.97913	0.9962	0.05908	0.01227	0.14832	OpenSea	chr4:149191991
		Brain Imaging	Aβ Burden	Cross-Sectional	cg00328411	305	360.994	[-124.121-846.109]	0.14578	0.8311	0.90656	0.00839	0.10838	OpenSea	chr4:149205617
		Brain Imaging	Aβ Burden	Cross-Sectional	cg02471166	305	-93.003	[-255.193-69.187]	0.26198	0.8311	0.62905	0.02431	0.28086	OpenSea	chr4:149244985
		Brain Imaging	Aβ Burden	Cross-Sectional	cg27225476	305	-142.854	[-377.105-91.396]	0.23296	0.8311	0.85878	0.01502	0.11725	OpenSea	chr4:149275542
		Brain Imaging	Aβ Burden	Cross-Sectional	cg06240648	305	-95.4741	[-547.132-356.184]	0.67895	0.9845	0.90857	0.00875	0.08216	OpenSea	chr4:149289762
		Brain Imaging	Aβ Burden	Cross-Sectional	cg04867484	305	-47.3816	[-261.507-166.744]	0.66482	0.9845	0.06179	0.03171	0.6046	OpenSea	chr4:149297469
		Brain Imaging	Aβ Burden	Cross-Sectional	cg19496136	305	-134.768	[-234.57--34.966]	0.00857	0.4731	0.74636	0.06158	0.84904	OpenSea	chr4:149336765
		Brain Imaging	Aβ Burden	Cross-Sectional	cg17253842	305	257.978	[-1.313-517.27]	0.05213	0.814	0.87057	0.02004	0.40157	OpenSea	chr4:149347991
		Brain Imaging	Aβ Burden	Cross-Sectional	cg19650300	305	195.228	[-123.195-513.651]	0.23046	0.8311	0.87161	0.0124	0.12937	OpenSea	chr4:149357960
		Brain Imaging	Aβ Burden	Cross-Sectional	cg09238384	305	-43.2078	[-385.108-298.693]	0.80455	0.9962	0.88033	0.01059	0.10479	OpenSea	chr4:149358199
		Brain Imaging	Aβ Burden	Cross-Sectional	cg07651033	305	-32.787	[-294.275-228.701]	0.80604	0.9962	0.891	0.01412	0.08448	OpenSea	chr4:149359043
		Brain Imaging	Aβ Burden	Cross-Sectional	cg23329208	305	-135.298	[-504.605-234.008]	0.4733	0.925	0.89218	0.01003	0.08891	N_Shelf	chr4:149360981
		Brain Imaging	Aβ Burden	Cross-Sectional	cg05437692	305	-118.944	[-251.373-13.485]	0.07939	0.814	0.28837	0.04393	0.32226	N_Shore	chr4:149362435
		Brain Imaging	Aβ Burden	Cross-Sectional	cg27460943	305	1.9155	[-215.408-219.239]	0.98623	0.9962	0.08292	0.02603	0.31306	N_Shore	chr4:149362809
		Brain Imaging	Aβ Burden	Cross-Sectional	cg01576854	305	-283.504	[-670.19-103.182]	0.1518	0.8311	0.07386	0.01207	0.20464	Island	chr4:149363450
		Brain Imaging	Aβ Burden	Cross-Sectional	cg13996731	305	-370.862	[-784.105-42.381]	0.07963	0.814	0.05943	0.00984	0.12921	Island	chr4:149363522
		Brain Imaging	Aβ Burden	Cross-Sectional	cg20140452	305	-55.1578	[-444.731-334.415]	0.78159	0.9962	0.07045	0.00971	0.0619	Island	chr4:149363715
		Brain Imaging	Aβ Burden	Cross-Sectional	cg10621979	305	27.8464	[-369.315-425.008]	0.89079	0.9962	0.05355	0.018	0.29521	Island	chr4:149365824
		Brain Imaging	Aβ Burden	Cross-Sectional	cg11239219	305	-34.3723	[-399.709-330.964]	0.85383	0.9962	0.05479	0.02153	0.3658	Island	chr4:149365887
		Brain Imaging	Aβ Burden	Cross-Sectional	cg10002915	305	44.8239	[-2.401-92.049]	0.06385	0.814	0.54242	0.08455	0.73095	S_Shelf	chr4:149369175
		Brain Imaging	Aβ Burden	Cross-Sectional	cg15374100	305	193.031	[-133.146-519.207]	0.24703	0.8311	0.86961	0.01354	0.2065	OpenSea	chr5:142651239
		Brain Imaging	Aβ Burden	Cross-Sectional	cg15740681	305	264.256	[-174.954-703.465]	0.23926	0.8311	0.89095	0.00925	0.09622	OpenSea	chr5:142653066
		Brain Imaging	Aβ Burden	Cross-Sectional	cg26081259	305	-295.84	[-796.618-204.938]	0.24786	0.8311	0.92585	0.00714	0.05144	OpenSea	chr5:142659682
		Brain Imaging	Aβ Burden	Cross-Sectional	cg13514002	305	90.8951	[-266.843-448.633]	0.61886	0.965	0.9104	0.01216	0.16497	OpenSea	chr5:142677292
		Brain Imaging	Aβ Burden	Cross-Sectional	cg24801588	305	99.5516	[-246.208-445.311]	0.57297	0.965	0.87613	0.01121	0.08119	OpenSea	chr5:142689858
		Brain Imaging	Aβ Burden	Cross-Sectional	cg00407401	305	189.174	[-181.274-559.622]	0.31771	0.8597	0.88336	0.0113	0.12225	OpenSea	chr5:142690959
		Brain Imaging	Aβ Burden	Cross-Sectional	cg19457823	305	6.0804	[-78.267-90.428]	0.88774	0.9962	0.85324	0.04572	0.44993	OpenSea	chr5:142692961
		Brain Imaging	Aβ Burden	Cross-Sectional	cg12741214	305	255.357	[-238.961-749.675]	0.31214	0.8597	0.92153	0.00739	0.05446	OpenSea	chr5:142695619
		Brain Imaging	Aβ Burden	Cross-Sectional	cg04457787	305	-293.306	[-746.347-159.736]	0.20548	0.8311	0.91851	0.00864	0.10367	OpenSea	chr5:142695636
		Brain Imaging	Aβ Burden	Cross-Sectional	cg20728768	305	-110.704	[-222.578-1.17]	0.05341	0.814	0.28495	0.05593	0.42144	OpenSea	chr5:142696594
		Brain Imaging	Aβ Burden	Cross-Sectional	cg25708981	305	81.6698	[-25.503-188.842]	0.13637	0.8311	0.81142	0.04619	0.93615	OpenSea	chr5:142697868
		Brain Imaging	Aβ Burden	Cross-Sectional	cg19645279	305	11.5087	[-112.369-135.386]	0.85564	0.9962	0.50627	0.03156	0.23017	OpenSea	chr5:142702733
		Brain Imaging	Aβ Burden	Cross-Sectional	cg19176661	305	-40.7644	[-421.384-339.855]	0.83388	0.9962	0.90339	0.00908	0.09406	OpenSea	chr5:142718549
		Brain Imaging	Aβ Burden	Cross-Sectional	cg07715663	305	-168.24	[-661.963-325.483]	0.50474	0.925	0.89993	0.0077	0.06068	OpenSea	chr5:142721796
		Brain Imaging	Aβ Burden	Cross-Sectional	cg24052866	305	9.1529	[-101.969-120.274]	0.87186	0.9962	0.69336	0.03805	0.44354	OpenSea	chr5:142727470
		Brain Imaging	Aβ Burden	Cross-Sectional	cg22233604	305	0.4741	[-193.422-194.37]	0.99618	0.9962	0.80239	0.02828	0.34628	OpenSea	chr5:142729377
		Brain Imaging	Aβ Burden	Cross-Sectional	cg03857453	305	-1.8635	[-117.528-113.801]	0.97483	0.9962	0.71757	0.04588	0.42058	OpenSea	chr5:142729913
		Brain Imaging	Aβ Burden	Cross-Sectional	cg15115787	305	13.3964	[-127.943-154.736]	0.85275	0.9962	0.2334	0.0467	0.33835	OpenSea	chr5:142730701
		Brain Imaging	Aβ Burden	Cross-Sectional	cg12888360	305	86.2052	[-34.211-206.622]	0.16164	0.8311	0.19071	0.0335	0.21819	OpenSea	chr5:142732502
		Brain Imaging	Aβ Burden	Cross-Sectional	cg18484679	305	-90.2836	[-354.984-174.417]	0.50434	0.925	0.85401	0.0155	0.16305	OpenSea	chr5:142740314
		Brain Imaging	Aβ Burden	Cross-Sectional	cg16586394	305	221.503	[-153.897-596.903]	0.24843	0.8311	0.90913	0.01422	0.19939	OpenSea	chr5:142757011
		Brain Imaging	Aβ Burden	Cross-Sectional	cg25535999	305	209.703	[-150.139-569.544]	0.25431	0.8311	0.89419	0.01191	0.0902	OpenSea	chr5:142757312
		Brain Imaging	Aβ Burden	Cross-Sectional	cg03746860	305	-66.161	[-422.452-290.13]	0.71615	0.9962	0.89502	0.01114	0.14119	OpenSea	chr5:142759375
		Brain Imaging	Aβ Burden	Cross-Sectional	cg20598211	305	-13.7491	[-428.764-401.266]	0.94827	0.9962	0.91627	0.01158	0.20941	OpenSea	chr5:142762454
		Brain Imaging	Aβ Burden	Cross-Sectional	cg05483455	305	-296.786	[-839.44-245.868]	0.28463	0.8447	0.92855	0.00637	0.07369	OpenSea	chr5:142762613
		Brain Imaging	Aβ Burden	Cross-Sectional	cg16594263	305	34.4304	[-513.571-582.432]	0.90208	0.9962	0.91923	0.01644	0.42455	OpenSea	chr5:142768048
		Brain Imaging	Aβ Burden	Cross-Sectional	cg16535116	305	-4.8721	[-205.754-196.01]	0.96212	0.9962	0.82395	0.0209	0.17773	OpenSea	chr5:142769612
		Brain Imaging	Aβ Burden	Cross-Sectional	cg05900547	305	-53.2511	[-270.959-164.457]	0.63201	0.9691	0.82362	0.01868	0.15468	OpenSea	chr5:142769791
		Brain Imaging	Aβ Burden	Cross-Sectional	cg19432243	305	39.9503	[-31.973-111.874]	0.27719	0.8447	0.75237	0.06043	0.89556	OpenSea	chr5:142770757
		Brain Imaging	Aβ Burden	Cross-Sectional	cg19820298	305	26.9618	[-42.081-96.005]	0.44466	0.925	0.78285	0.05639	0.30689	OpenSea	chr5:142770782
		Brain Imaging	Aβ Burden	Cross-Sectional	cg27107893	305	9.8358	[-28.223-47.894]	0.61286	0.965	0.79309	0.09578	0.9445	OpenSea	chr5:142776274
		Brain Imaging	Aβ Burden	Cross-Sectional	cg17342132	305	40.7856	[-151.028-232.599]	0.67716	0.9845	0.86999	0.03297	0.31216	N_Shore	chr5:142780254
		Brain Imaging	Aβ Burden	Cross-Sectional	cg07742588	305	-39.8519	[-142.196-62.492]	0.44596	0.925	0.78914	0.05595	0.91885	N_Shore	chr5:142780439
		Brain Imaging	Aβ Burden	Cross-Sectional	cg00294552	305	-1.5015	[-171.103-168.1]	0.98617	0.9962	0.84207	0.02221	0.20462	N_Shore	chr5:142780486
		Brain Imaging	Aβ Burden	Cross-Sectional	cg16219186	305	100.624	[-119.07-320.318]	0.37008	0.925	0.88479	0.02148	0.22312	N_Shore	chr5:142780531
		Brain Imaging	Aβ Burden	Cross-Sectional	cg08845721	305	69.1842	[-148.01-286.378]	0.5329	0.925	0.90291	0.02257	0.35006	N_Shore	chr5:142780693
		Brain Imaging	Aβ Burden	Cross-Sectional	cg12969488	305	80.6972	[-34.985-196.379]	0.1726	0.8311	0.6959	0.03946	0.36342	N_Shore	chr5:142780984
		Brain Imaging	Aβ Burden	Cross-Sectional	cg07733851	305	-32.4626	[-99.588-34.663]	0.34398	0.9042	0.31012	0.05444	0.48866	N_Shore	chr5:142781498
		Brain Imaging	Aβ Burden	Cross-Sectional	cg27122725	305	2.623	[-349.659-354.905]	0.98837	0.9962	0.08247	0.03649	0.61758	N_Shore	chr5:142781723
		Brain Imaging	Aβ Burden	Cross-Sectional	cg06952416	305	98.2576	[-147.107-343.622]	0.43316	0.925	0.10317	0.01595	0.14679	N_Shore	chr5:142781736
		Brain Imaging	Aβ Burden	Cross-Sectional	cg15910486	305	-231.677	[-554.799-91.444]	0.161	0.8311	0.06987	0.01223	0.07877	Island	chr5:142783621
		Brain Imaging	Aβ Burden	Cross-Sectional	cg01967637	305	183.047	[-91.657-457.751]	0.19258	0.8311	0.05849	0.01419	0.08687	Island	chr5:142784019
		Brain Imaging	Aβ Burden	Cross-Sectional	cg26464411	305	-40.4346	[-335.788-254.919]	0.78864	0.9962	0.0622	0.01192	0.08127	Island	chr5:142784222
		Brain Imaging	Aβ Burden	Cross-Sectional	cg06968181	305	930.028	[224.302-1635.754]	0.01029	0.4731	0.05291	0.02403	0.66787	Island	chr5:142784323
		Brain Imaging	Aβ Burden	Cross-Sectional	cg21702128	305	-164.171	[-548.832-220.489]	0.40355	0.925	0.08227	0.00965	0.07742	Island	chr5:142784721
		Brain Imaging	Aβ Burden	Cross-Sectional	cg18718518	305	40.9827	[-38.815-120.78]	0.31495	0.8597	0.53255	0.05217	0.3892	S_Shore	chr5:142785455
		Brain Imaging	Aβ Burden	Cross-Sectional	cg13764763	305	71.5104	[3.197-139.824]	0.04109	0.814	0.85356	0.05856	0.5219	S_Shore	chr5:142785501
		Brain Imaging	Aβ Burden	Cross-Sectional	cg16224829	305	-5.6152	[-124.593-113.362]	0.92636	0.9962	0.79156	0.03531	0.28375	OpenSea	chr5:142792698
		Brain Imaging	Aβ Burden	Cross-Sectional	cg01751279	305	-38.6212	[-183.587-106.344]	0.60195	0.965	0.83882	0.03986	0.35649	OpenSea	chr5:142793924
		Brain Imaging	Aβ Burden	Cross-Sectional	cg23430507	305	203.561	[30.294-376.828]	0.022	0.6748	0.67871	0.03655	0.31636	OpenSea	chr5:142798375
		Brain Imaging	Aβ Burden	Cross-Sectional	cg17349736	305	108.063	[-165.075-381.201]	0.43871	0.925	0.8687	0.01502	0.1392	OpenSea	chr5:142802329
		Brain Imaging	Aβ Burden	Cross-Sectional	cg14438279	305	-48.6322	[-182.023-84.759]	0.47544	0.925	0.80706	0.05892	0.46785	OpenSea	chr5:142806343
		Brain Imaging	Aβ Burden	Cross-Sectional	cg08423118	305	-0.2624	[-56.613-56.088]	0.99273	0.9962	0.77492	0.07191	0.32112	OpenSea	chr5:142808610
		Brain Imaging	Aβ Burden	Cross-Sectional	cg23776787	305	108.94	[-295.042-512.922]	0.59752	0.965	0.05181	0.01906	0.42487	OpenSea	chr5:142814315
		Brain Imaging	Aβ Burden	Cross-Sectional	cg03906910	305	-25.6832	[-149.592-98.226]	0.68485	0.9845	0.22081	0.05239	0.37839	OpenSea	chr5:142814388
		Brain Imaging	Aβ Burden	Cross-Sectional	cg07589972	305	224.635	[-272.262-721.533]	0.37632	0.925	0.90005	0.01417	0.2547	OpenSea	chr5:142815463
		Brain Imaging	Aβ Burden	Cross-Sectional	cg12466613	305	192.723	[-387.913-773.359]	0.51585	0.925	0.91748	0.01192	0.24478	OpenSea	chr5:142815469
		Brain Imaging	Aβ Burden	Cross-Sectional	cg21979215	305	4.267	[-49.641-58.175]	0.87682	0.9962	0.76917	0.06877	0.39558	OpenSea	chr5:142815807
		Brain Imaging	Aβ Burden	Cross-Sectional	cg11022710	305	-173.063	[-467.928-121.802]	0.25094	0.8311	0.90751	0.01966	0.20763	OpenSea	chr5:142820479
		Brain Imaging	Aβ Burden	Longitudinal	cg23650353	277	-4.0914	[-35.594-27.411]	0.79927	0.978	0.92108	0.028	0.43394	OpenSea	chr4:148993643
		Brain Imaging	Aβ Burden	Longitudinal	cg19491599	277	-25.9275	[-51.986-0.131]	0.05223	0.8604	0.84529	0.0161	0.20857	OpenSea	chr4:149000607
		Brain Imaging	Aβ Burden	Longitudinal	cg10207656	277	12.6819	[-20.228-45.592]	0.45076	0.9131	0.90855	0.01373	0.20071	OpenSea	chr4:149019526
		Brain Imaging	Aβ Burden	Longitudinal	cg09143276	277	6.7406	[-10.978-24.459]	0.45656	0.9131	0.80845	0.02074	0.13091	OpenSea	chr4:149066518
		Brain Imaging	Aβ Burden	Longitudinal	cg13000004	277	-9.1035	[-41.849-23.642]	0.58629	0.978	0.86983	0.01161	0.09813	OpenSea	chr4:149074093
		Brain Imaging	Aβ Burden	Longitudinal	cg10590842	277	0.7634	[-35.826-37.353]	0.96741	0.978	0.9034	0.01143	0.10122	OpenSea	chr4:149083955
		Brain Imaging	Aβ Burden	Longitudinal	cg21701890	277	3.7601	[-13.115-20.635]	0.66267	0.978	0.61622	0.02898	0.23369	OpenSea	chr4:149094632
		Brain Imaging	Aβ Burden	Longitudinal	cg27234800	277	4.5747	[-1.544-10.694]	0.14404	0.8604	0.89127	0.0525	0.39493	OpenSea	chr4:149116611
		Brain Imaging	Aβ Burden	Longitudinal	cg25672354	277	20.2126	[-1.682-42.107]	0.07154	0.8604	0.86697	0.01933	0.23574	OpenSea	chr4:149122383
		Brain Imaging	Aβ Burden	Longitudinal	cg10993059	277	-3.2005	[-36.764-30.363]	0.85189	0.978	0.892	0.014	0.24786	OpenSea	chr4:149123062
		Brain Imaging	Aβ Burden	Longitudinal	cg07335874	277	-15.9883	[-50.84-18.864]	0.3694	0.8604	0.89734	0.01678	0.25463	OpenSea	chr4:149136507
		Brain Imaging	Aβ Burden	Longitudinal	cg08264907	277	-8.5954	[-54.942-37.751]	0.71652	0.978	0.90365	0.00834	0.08404	OpenSea	chr4:149144045
		Brain Imaging	Aβ Burden	Longitudinal	cg07275757	277	55.9671	[21.307-90.627]	0.00174	0.1596	0.89578	0.01331	0.13086	OpenSea	chr4:149189974
		Brain Imaging	Aβ Burden	Longitudinal	cg13157799	277	10.1032	[-28.202-48.408]	0.60562	0.978	0.05908	0.01227	0.14832	OpenSea	chr4:149191991
		Brain Imaging	Aβ Burden	Longitudinal	cg00328411	277	-1.0973	[-48.362-46.168]	0.96374	0.978	0.90656	0.00839	0.10838	OpenSea	chr4:149205617
		Brain Imaging	Aβ Burden	Longitudinal	cg02471166	277	0.5568	[-15.41-16.523]	0.94556	0.978	0.62905	0.02431	0.28086	OpenSea	chr4:149244985
		Brain Imaging	Aβ Burden	Longitudinal	cg27225476	277	-0.4956	[-23.728-22.737]	0.96668	0.978	0.85878	0.01502	0.11725	OpenSea	chr4:149275542
		Brain Imaging	Aβ Burden	Longitudinal	cg06240648	277	-2.7232	[-46.081-40.634]	0.90212	0.978	0.90857	0.00875	0.08216	OpenSea	chr4:149289762
		Brain Imaging	Aβ Burden	Longitudinal	cg04867484	277	-6.5764	[-27.333-14.18]	0.53514	0.978	0.06179	0.03171	0.6046	OpenSea	chr4:149297469
		Brain Imaging	Aβ Burden	Longitudinal	cg19496136	277	0.4378	[-9.502-10.377]	0.93127	0.978	0.74636	0.06158	0.84904	OpenSea	chr4:149336765
		Brain Imaging	Aβ Burden	Longitudinal	cg17253842	277	0.3197	[-25.438-26.077]	0.98061	0.9806	0.87057	0.02004	0.40157	OpenSea	chr4:149347991
		Brain Imaging	Aβ Burden	Longitudinal	cg19650300	277	-20.2485	[-50.563-10.066]	0.19163	0.8604	0.87161	0.0124	0.12937	OpenSea	chr4:149357960
		Brain Imaging	Aβ Burden	Longitudinal	cg09238384	277	-16.772	[-49.07-15.526]	0.30971	0.8604	0.88033	0.01059	0.10479	OpenSea	chr4:149358199
		Brain Imaging	Aβ Burden	Longitudinal	cg07651033	277	1.5809	[-23.926-27.088]	0.90341	0.978	0.891	0.01412	0.08448	OpenSea	chr4:149359043
		Brain Imaging	Aβ Burden	Longitudinal	cg23329208	277	-2.7767	[-39.54-33.986]	0.88243	0.978	0.89218	0.01003	0.08891	N_Shelf	chr4:149360981
		Brain Imaging	Aβ Burden	Longitudinal	cg05437692	277	-6.0886	[-18.871-6.694]	0.35137	0.8604	0.28837	0.04393	0.32226	N_Shore	chr4:149362435
		Brain Imaging	Aβ Burden	Longitudinal	cg27460943	277	-10.8886	[-31.898-10.12]	0.31065	0.8604	0.08292	0.02603	0.31306	N_Shore	chr4:149362809
		Brain Imaging	Aβ Burden	Longitudinal	cg01576854	277	-2.7452	[-39.858-34.368]	0.88484	0.978	0.07386	0.01207	0.20464	Island	chr4:149363450
		Brain Imaging	Aβ Burden	Longitudinal	cg13996731	277	-3.2271	[-43.474-37.02]	0.87524	0.978	0.05943	0.00984	0.12921	Island	chr4:149363522
		Brain Imaging	Aβ Burden	Longitudinal	cg20140452	277	-2.0103	[-40.064-36.043]	0.91761	0.978	0.07045	0.00971	0.0619	Island	chr4:149363715
		Brain Imaging	Aβ Burden	Longitudinal	cg10621979	277	15.942	[-22.364-54.248]	0.41541	0.8721	0.05355	0.018	0.29521	Island	chr4:149365824
		Brain Imaging	Aβ Burden	Longitudinal	cg11239219	277	-2.5508	[-37.611-32.509]	0.88672	0.978	0.05479	0.02153	0.3658	Island	chr4:149365887
		Brain Imaging	Aβ Burden	Longitudinal	cg10002915	277	-0.2309	[-4.816-4.354]	0.92145	0.978	0.54242	0.08455	0.73095	S_Shelf	chr4:149369175
		Brain Imaging	Aβ Burden	Longitudinal	cg15374100	277	-6.3237	[-38.642-25.995]	0.70166	0.978	0.86961	0.01354	0.2065	OpenSea	chr5:142651239
		Brain Imaging	Aβ Burden	Longitudinal	cg15740681	277	-22.257	[-66.261-21.747]	0.32243	0.8604	0.89095	0.00925	0.09622	OpenSea	chr5:142653066
		Brain Imaging	Aβ Burden	Longitudinal	cg26081259	277	9.0545	[-39.716-57.825]	0.71624	0.978	0.92585	0.00714	0.05144	OpenSea	chr5:142659682
		Brain Imaging	Aβ Burden	Longitudinal	cg13514002	277	-23.4664	[-57.813-10.881]	0.1817	0.8604	0.9104	0.01216	0.16497	OpenSea	chr5:142677292
		Brain Imaging	Aβ Burden	Longitudinal	cg24801588	277	-21.8536	[-54.88-11.172]	0.19579	0.8604	0.87613	0.01121	0.08119	OpenSea	chr5:142689858
		Brain Imaging	Aβ Burden	Longitudinal	cg00407401	277	-1.8745	[-38.026-34.277]	0.91913	0.978	0.88336	0.0113	0.12225	OpenSea	chr5:142690959
		Brain Imaging	Aβ Burden	Longitudinal	cg19457823	277	-2.1951	[-10.04-5.65]	0.58386	0.978	0.85324	0.04572	0.44993	OpenSea	chr5:142692961
		Brain Imaging	Aβ Burden	Longitudinal	cg12741214	277	-16.9892	[-66.564-32.585]	0.50237	0.9629	0.92153	0.00739	0.05446	OpenSea	chr5:142695619
		Brain Imaging	Aβ Burden	Longitudinal	cg04457787	277	-20.2078	[-65.573-25.157]	0.38342	0.8604	0.91851	0.00864	0.10367	OpenSea	chr5:142695636
		Brain Imaging	Aβ Burden	Longitudinal	cg20728768	277	7.99	[-2.814-18.794]	0.14841	0.8604	0.28495	0.05593	0.42144	OpenSea	chr5:142696594
		Brain Imaging	Aβ Burden	Longitudinal	cg25708981	277	-5.2081	[-15.65-5.234]	0.32918	0.8604	0.81142	0.04619	0.93615	OpenSea	chr5:142697868
		Brain Imaging	Aβ Burden	Longitudinal	cg19645279	277	6.639	[-5.113-18.391]	0.26921	0.8604	0.50627	0.03156	0.23017	OpenSea	chr5:142702733
		Brain Imaging	Aβ Burden	Longitudinal	cg19176661	277	-3.4542	[-39.726-32.818]	0.85208	0.978	0.90339	0.00908	0.09406	OpenSea	chr5:142718549
		Brain Imaging	Aβ Burden	Longitudinal	cg07715663	277	-26.0212	[-73.306-21.263]	0.28176	0.8604	0.89993	0.0077	0.06068	OpenSea	chr5:142721796
		Brain Imaging	Aβ Burden	Longitudinal	cg24052866	277	5.0047	[-5.63-15.639]	0.35719	0.8604	0.69336	0.03805	0.44354	OpenSea	chr5:142727470
		Brain Imaging	Aβ Burden	Longitudinal	cg22233604	277	-3.8904	[-22.594-14.813]	0.68383	0.978	0.80239	0.02828	0.34628	OpenSea	chr5:142729377
		Brain Imaging	Aβ Burden	Longitudinal	cg03857453	277	-1.9091	[-12.937-9.119]	0.73465	0.978	0.71757	0.04588	0.42058	OpenSea	chr5:142729913
		Brain Imaging	Aβ Burden	Longitudinal	cg15115787	277	5.8311	[-7.821-19.483]	0.40326	0.8721	0.2334	0.0467	0.33835	OpenSea	chr5:142730701
		Brain Imaging	Aβ Burden	Longitudinal	cg12888360	277	-5.3291	[-16.924-6.266]	0.3685	0.8604	0.19071	0.0335	0.21819	OpenSea	chr5:142732502
		Brain Imaging	Aβ Burden	Longitudinal	cg18484679	277	-10.8735	[-37.095-15.348]	0.4171	0.8721	0.85401	0.0155	0.16305	OpenSea	chr5:142740314
		Brain Imaging	Aβ Burden	Longitudinal	cg16586394	277	31.1112	[-5.062-67.284]	0.09304	0.8604	0.90913	0.01422	0.19939	OpenSea	chr5:142757011
		Brain Imaging	Aβ Burden	Longitudinal	cg25535999	277	16.2232	[-19.507-51.953]	0.37432	0.8604	0.89419	0.01191	0.0902	OpenSea	chr5:142757312
		Brain Imaging	Aβ Burden	Longitudinal	cg03746860	277	-21.7584	[-55.565-12.049]	0.20827	0.8604	0.89502	0.01114	0.14119	OpenSea	chr5:142759375
		Brain Imaging	Aβ Burden	Longitudinal	cg20598211	277	-5.4711	[-46.222-35.28]	0.79265	0.978	0.91627	0.01158	0.20941	OpenSea	chr5:142762454
		Brain Imaging	Aβ Burden	Longitudinal	cg05483455	277	-1.8221	[-54.478-50.834]	0.94598	0.978	0.92855	0.00637	0.07369	OpenSea	chr5:142762613
		Brain Imaging	Aβ Burden	Longitudinal	cg16594263	277	-5.0644	[-57.679-47.551]	0.85051	0.978	0.91923	0.01644	0.42455	OpenSea	chr5:142768048
		Brain Imaging	Aβ Burden	Longitudinal	cg16535116	277	9.7023	[-9.639-29.044]	0.32643	0.8604	0.82395	0.0209	0.17773	OpenSea	chr5:142769612
		Brain Imaging	Aβ Burden	Longitudinal	cg05900547	277	-1.0857	[-22.183-20.011]	0.91974	0.978	0.82362	0.01868	0.15468	OpenSea	chr5:142769791
		Brain Imaging	Aβ Burden	Longitudinal	cg19432243	277	-0.1858	[-7.152-6.781]	0.95835	0.978	0.75237	0.06043	0.89556	OpenSea	chr5:142770757
		Brain Imaging	Aβ Burden	Longitudinal	cg19820298	277	-4.3977	[-11.287-2.491]	0.21198	0.8604	0.78285	0.05639	0.30689	OpenSea	chr5:142770782
		Brain Imaging	Aβ Burden	Longitudinal	cg27107893	277	-2.3367	[-6.401-1.728]	0.26084	0.8604	0.79309	0.09578	0.9445	OpenSea	chr5:142776274
		Brain Imaging	Aβ Burden	Longitudinal	cg17342132	277	13.6973	[-4.629-32.024]	0.14415	0.8604	0.86999	0.03297	0.31216	N_Shore	chr5:142780254
		Brain Imaging	Aβ Burden	Longitudinal	cg07742588	277	-1.1185	[-11.437-9.2]	0.83192	0.978	0.78914	0.05595	0.91885	N_Shore	chr5:142780439
		Brain Imaging	Aβ Burden	Longitudinal	cg00294552	277	0.8874	[-15.36-17.134]	0.91483	0.978	0.84207	0.02221	0.20462	N_Shore	chr5:142780486
		Brain Imaging	Aβ Burden	Longitudinal	cg16219186	277	4.4047	[-16.844-25.653]	0.68486	0.978	0.88479	0.02148	0.22312	N_Shore	chr5:142780531
		Brain Imaging	Aβ Burden	Longitudinal	cg08845721	277	16.7286	[-4.912-38.369]	0.13095	0.8604	0.90291	0.02257	0.35006	N_Shore	chr5:142780693
		Brain Imaging	Aβ Burden	Longitudinal	cg12969488	277	3.5311	[-7.754-14.816]	0.54022	0.978	0.6959	0.03946	0.36342	N_Shore	chr5:142780984
		Brain Imaging	Aβ Burden	Longitudinal	cg07733851	277	1.9754	[-4.467-8.418]	0.54836	0.978	0.31012	0.05444	0.48866	N_Shore	chr5:142781498
		Brain Imaging	Aβ Burden	Longitudinal	cg27122725	277	8.7501	[-25.77-43.27]	0.61973	0.978	0.08247	0.03649	0.61758	N_Shore	chr5:142781723
		Brain Imaging	Aβ Burden	Longitudinal	cg06952416	277	-14.7542	[-38.44-8.931]	0.22322	0.8604	0.10317	0.01595	0.14679	N_Shore	chr5:142781736
		Brain Imaging	Aβ Burden	Longitudinal	cg15910486	277	19.7834	[-12.024-51.591]	0.22392	0.8604	0.06987	0.01223	0.07877	Island	chr5:142783621
		Brain Imaging	Aβ Burden	Longitudinal	cg01967637	277	17.5917	[-9.889-45.073]	0.21072	0.8604	0.05849	0.01419	0.08687	Island	chr5:142784019
		Brain Imaging	Aβ Burden	Longitudinal	cg26464411	277	19.5914	[-8.493-47.676]	0.17271	0.8604	0.0622	0.01192	0.08127	Island	chr5:142784222
		Brain Imaging	Aβ Burden	Longitudinal	cg06968181	277	-46.2918	[-119.981-27.397]	0.21933	0.8604	0.05291	0.02403	0.66787	Island	chr5:142784323
		Brain Imaging	Aβ Burden	Longitudinal	cg21702128	277	17.508	[-19.802-54.818]	0.35855	0.8604	0.08227	0.00965	0.07742	Island	chr5:142784721
		Brain Imaging	Aβ Burden	Longitudinal	cg18718518	277	4.7663	[-3.206-12.738]	0.24234	0.8604	0.53255	0.05217	0.3892	S_Shore	chr5:142785455
		Brain Imaging	Aβ Burden	Longitudinal	cg13764763	277	-0.9439	[-7.726-5.838]	0.78524	0.978	0.85356	0.05856	0.5219	S_Shore	chr5:142785501
		Brain Imaging	Aβ Burden	Longitudinal	cg16224829	277	1.1599	[-10.541-12.861]	0.8461	0.978	0.79156	0.03531	0.28375	OpenSea	chr5:142792698
		Brain Imaging	Aβ Burden	Longitudinal	cg01751279	277	8.7975	[-5.281-22.876]	0.22176	0.8604	0.83882	0.03986	0.35649	OpenSea	chr5:142793924
		Brain Imaging	Aβ Burden	Longitudinal	cg23430507	277	11.992	[-5.404-29.388]	0.17782	0.8604	0.67871	0.03655	0.31636	OpenSea	chr5:142798375
		Brain Imaging	Aβ Burden	Longitudinal	cg17349736	277	-7.3024	[-33.874-19.27]	0.5906	0.978	0.8687	0.01502	0.1392	OpenSea	chr5:142802329
		Brain Imaging	Aβ Burden	Longitudinal	cg14438279	277	14.2137	[1.578-26.85]	0.02835	0.8604	0.80706	0.05892	0.46785	OpenSea	chr5:142806343
		Brain Imaging	Aβ Burden	Longitudinal	cg08423118	277	-1.0429	[-6.558-4.472]	0.71123	0.978	0.77492	0.07191	0.32112	OpenSea	chr5:142808610
		Brain Imaging	Aβ Burden	Longitudinal	cg23776787	277	-10.4249	[-49.982-29.133]	0.60592	0.978	0.05181	0.01906	0.42487	OpenSea	chr5:142814315
		Brain Imaging	Aβ Burden	Longitudinal	cg03906910	277	4.2273	[-8.002-16.457]	0.4987	0.9629	0.22081	0.05239	0.37839	OpenSea	chr5:142814388
		Brain Imaging	Aβ Burden	Longitudinal	cg07589972	277	27.9189	[-20.589-76.426]	0.26032	0.8604	0.90005	0.01417	0.2547	OpenSea	chr5:142815463
		Brain Imaging	Aβ Burden	Longitudinal	cg12466613	277	33.8333	[-22.797-90.464]	0.24267	0.8604	0.91748	0.01192	0.24478	OpenSea	chr5:142815469
		Brain Imaging	Aβ Burden	Longitudinal	cg21979215	277	-2.4911	[-7.794-2.812]	0.35807	0.8604	0.76917	0.06877	0.39558	OpenSea	chr5:142815807
		Brain Imaging	Aβ Burden	Longitudinal	cg11022710	277	-13.9246	[-42.643-14.794]	0.34283	0.8604	0.90751	0.01966	0.20763	OpenSea	chr5:142820479
		Brain Imaging	Grey Matter Volume	Cross-Sectional	cg23650353	292	69.1683	[-100.944-239.281]	0.42617	0.9982	0.92108	0.028	0.43394	OpenSea	chr4:148993643
		Brain Imaging	Grey Matter Volume	Cross-Sectional	cg19491599	292	-34.9554	[-175.602-105.691]	0.62655	0.9982	0.84529	0.0161	0.20857	OpenSea	chr4:149000607
		Brain Imaging	Grey Matter Volume	Cross-Sectional	cg10207656	292	57.774	[-121.193-236.741]	0.52744	0.9982	0.90855	0.01373	0.20071	OpenSea	chr4:149019526
		Brain Imaging	Grey Matter Volume	Cross-Sectional	cg09143276	292	49.4477	[-46.238-145.134]	0.31201	0.9982	0.80845	0.02074	0.13091	OpenSea	chr4:149066518
		Brain Imaging	Grey Matter Volume	Cross-Sectional	cg13000004	292	63.1366	[-115.152-241.426]	0.48821	0.9982	0.86983	0.01161	0.09813	OpenSea	chr4:149074093
		Brain Imaging	Grey Matter Volume	Cross-Sectional	cg10590842	292	17.9723	[-179.855-215.799]	0.8588	0.9982	0.9034	0.01143	0.10122	OpenSea	chr4:149083955
		Brain Imaging	Grey Matter Volume	Cross-Sectional	cg21701890	292	28.4868	[-62.466-119.44]	0.5398	0.9982	0.61622	0.02898	0.23369	OpenSea	chr4:149094632
		Brain Imaging	Grey Matter Volume	Cross-Sectional	cg27234800	292	16.6709	[-16.891-50.233]	0.33112	0.9982	0.89127	0.0525	0.39493	OpenSea	chr4:149116611
		Brain Imaging	Grey Matter Volume	Cross-Sectional	cg25672354	292	44.2641	[-74.807-163.335]	0.46685	0.9982	0.86697	0.01933	0.23574	OpenSea	chr4:149122383
		Brain Imaging	Grey Matter Volume	Cross-Sectional	cg10993059	292	-138.652	[-314.968-37.663]	0.12438	0.8933	0.892	0.014	0.24786	OpenSea	chr4:149123062
		Brain Imaging	Grey Matter Volume	Cross-Sectional	cg07335874	292	-67.8396	[-253.473-117.793]	0.47442	0.9982	0.89734	0.01678	0.25463	OpenSea	chr4:149136507
		Brain Imaging	Grey Matter Volume	Cross-Sectional	cg08264907	292	50.3657	[-199.772-300.504]	0.69341	0.9982	0.90365	0.00834	0.08404	OpenSea	chr4:149144045
		Brain Imaging	Grey Matter Volume	Cross-Sectional	cg07275757	292	-20.3147	[-207.849-167.219]	0.83202	0.9982	0.89578	0.01331	0.13086	OpenSea	chr4:149189974
		Brain Imaging	Grey Matter Volume	Cross-Sectional	cg13157799	292	-104.897	[-298.698-88.903]	0.28967	0.9982	0.05908	0.01227	0.14832	OpenSea	chr4:149191991
		Brain Imaging	Grey Matter Volume	Cross-Sectional	cg00328411	292	96.5999	[-156.881-350.081]	0.45573	0.9982	0.90656	0.00839	0.10838	OpenSea	chr4:149205617
		Brain Imaging	Grey Matter Volume	Cross-Sectional	cg02471166	292	-64.0209	[-147.928-19.886]	0.13593	0.8933	0.62905	0.02431	0.28086	OpenSea	chr4:149244985
		Brain Imaging	Grey Matter Volume	Cross-Sectional	cg27225476	292	81.9043	[-39.877-203.686]	0.18853	0.9129	0.85878	0.01502	0.11725	OpenSea	chr4:149275542
		Brain Imaging	Grey Matter Volume	Cross-Sectional	cg06240648	292	61.6463	[-173.379-296.672]	0.60759	0.9982	0.90857	0.00875	0.08216	OpenSea	chr4:149289762
		Brain Imaging	Grey Matter Volume	Cross-Sectional	cg04867484	292	2.6321	[-108.691-113.955]	0.96307	0.9982	0.06179	0.03171	0.6046	OpenSea	chr4:149297469
		Brain Imaging	Grey Matter Volume	Cross-Sectional	cg19496136	292	36.8416	[-15.868-89.552]	0.17181	0.9129	0.74636	0.06158	0.84904	OpenSea	chr4:149336765
		Brain Imaging	Grey Matter Volume	Cross-Sectional	cg17253842	292	-19.1793	[-155.408-117.049]	0.7828	0.9982	0.87057	0.02004	0.40157	OpenSea	chr4:149347991
		Brain Imaging	Grey Matter Volume	Cross-Sectional	cg19650300	292	39.9388	[-125.973-205.851]	0.63743	0.9982	0.87161	0.0124	0.12937	OpenSea	chr4:149357960
		Brain Imaging	Grey Matter Volume	Cross-Sectional	cg09238384	292	21.7782	[-155.402-198.958]	0.8098	0.9982	0.88033	0.01059	0.10479	OpenSea	chr4:149358199
		Brain Imaging	Grey Matter Volume	Cross-Sectional	cg07651033	292	58.4448	[-77.028-193.918]	0.39852	0.9982	0.891	0.01412	0.08448	OpenSea	chr4:149359043
		Brain Imaging	Grey Matter Volume	Cross-Sectional	cg23329208	292	-211.427	[-401.464--21.389]	0.03005	0.6423	0.89218	0.01003	0.08891	N_Shelf	chr4:149360981
		Brain Imaging	Grey Matter Volume	Cross-Sectional	cg05437692	292	52.9825	[-16.128-122.093]	0.13408	0.8933	0.28837	0.04393	0.32226	N_Shore	chr4:149362435
		Brain Imaging	Grey Matter Volume	Cross-Sectional	cg27460943	292	6.5416	[-106.282-119.365]	0.9096	0.9982	0.08292	0.02603	0.31306	N_Shore	chr4:149362809
		Brain Imaging	Grey Matter Volume	Cross-Sectional	cg01576854	292	96.8634	[-103.299-297.026]	0.34371	0.9982	0.07386	0.01207	0.20464	Island	chr4:149363450
		Brain Imaging	Grey Matter Volume	Cross-Sectional	cg13996731	292	156.113	[-59.625-371.851]	0.15723	0.9129	0.05943	0.00984	0.12921	Island	chr4:149363522
		Brain Imaging	Grey Matter Volume	Cross-Sectional	cg20140452	292	134.375	[-70.696-339.445]	0.20011	0.9205	0.07045	0.00971	0.0619	Island	chr4:149363715
		Brain Imaging	Grey Matter Volume	Cross-Sectional	cg10621979	292	61.4839	[-142.422-265.39]	0.555	0.9982	0.05355	0.018	0.29521	Island	chr4:149365824
		Brain Imaging	Grey Matter Volume	Cross-Sectional	cg11239219	292	-36.7074	[-226.152-152.737]	0.7044	0.9982	0.05479	0.02153	0.3658	Island	chr4:149365887
		Brain Imaging	Grey Matter Volume	Cross-Sectional	cg10002915	292	11.2009	[-13.378-35.78]	0.37254	0.9982	0.54242	0.08455	0.73095	S_Shelf	chr4:149369175
		Brain Imaging	Grey Matter Volume	Cross-Sectional	cg15374100	292	5.4292	[-164.635-175.493]	0.95015	0.9982	0.86961	0.01354	0.2065	OpenSea	chr5:142651239
		Brain Imaging	Grey Matter Volume	Cross-Sectional	cg15740681	292	77.6471	[-151.493-306.787]	0.50713	0.9982	0.89095	0.00925	0.09622	OpenSea	chr5:142653066
		Brain Imaging	Grey Matter Volume	Cross-Sectional	cg26081259	292	-18.7303	[-280.067-242.607]	0.88839	0.9982	0.92585	0.00714	0.05144	OpenSea	chr5:142659682
		Brain Imaging	Grey Matter Volume	Cross-Sectional	cg13514002	292	15.7597	[-169.969-201.489]	0.86803	0.9982	0.9104	0.01216	0.16497	OpenSea	chr5:142677292
		Brain Imaging	Grey Matter Volume	Cross-Sectional	cg24801588	292	1.4043	[-178.036-180.844]	0.98777	0.9982	0.87613	0.01121	0.08119	OpenSea	chr5:142689858
		Brain Imaging	Grey Matter Volume	Cross-Sectional	cg00407401	292	-56.5435	[-249.499-136.412]	0.56619	0.9982	0.88336	0.0113	0.12225	OpenSea	chr5:142690959
		Brain Imaging	Grey Matter Volume	Cross-Sectional	cg19457823	292	0.3883	[-42.642-43.419]	0.9859	0.9982	0.85324	0.04572	0.44993	OpenSea	chr5:142692961
		Brain Imaging	Grey Matter Volume	Cross-Sectional	cg12741214	292	-287.022	[-546.46--27.584]	0.03098	0.6423	0.92153	0.00739	0.05446	OpenSea	chr5:142695619
		Brain Imaging	Grey Matter Volume	Cross-Sectional	cg04457787	292	-287.289	[-530.226--44.352]	0.02119	0.6423	0.91851	0.00864	0.10367	OpenSea	chr5:142695636
		Brain Imaging	Grey Matter Volume	Cross-Sectional	cg20728768	292	35.5196	[-22.647-93.686]	0.23237	0.9982	0.28495	0.05593	0.42144	OpenSea	chr5:142696594
		Brain Imaging	Grey Matter Volume	Cross-Sectional	cg25708981	292	-1.1408	[-57.704-55.423]	0.9685	0.9982	0.81142	0.04619	0.93615	OpenSea	chr5:142697868
		Brain Imaging	Grey Matter Volume	Cross-Sectional	cg19645279	292	68.9577	[5.299-132.617]	0.03463	0.6423	0.50627	0.03156	0.23017	OpenSea	chr5:142702733
		Brain Imaging	Grey Matter Volume	Cross-Sectional	cg19176661	292	-11.7536	[-208.298-184.79]	0.90678	0.9982	0.90339	0.00908	0.09406	OpenSea	chr5:142718549
		Brain Imaging	Grey Matter Volume	Cross-Sectional	cg07715663	292	-147.218	[-402.907-108.471]	0.26008	0.9982	0.89993	0.0077	0.06068	OpenSea	chr5:142721796
		Brain Imaging	Grey Matter Volume	Cross-Sectional	cg24052866	292	3.0241	[-54.348-60.396]	0.91779	0.9982	0.69336	0.03805	0.44354	OpenSea	chr5:142727470
		Brain Imaging	Grey Matter Volume	Cross-Sectional	cg22233604	292	10.2206	[-92.031-112.472]	0.84482	0.9982	0.80239	0.02828	0.34628	OpenSea	chr5:142729377
		Brain Imaging	Grey Matter Volume	Cross-Sectional	cg03857453	292	7.0898	[-52.676-66.856]	0.81632	0.9982	0.71757	0.04588	0.42058	OpenSea	chr5:142729913
		Brain Imaging	Grey Matter Volume	Cross-Sectional	cg15115787	292	-11.2069	[-84.172-61.759]	0.76361	0.9982	0.2334	0.0467	0.33835	OpenSea	chr5:142730701
		Brain Imaging	Grey Matter Volume	Cross-Sectional	cg12888360	292	-23.049	[-85.769-39.671]	0.47196	0.9982	0.19071	0.0335	0.21819	OpenSea	chr5:142732502
		Brain Imaging	Grey Matter Volume	Cross-Sectional	cg18484679	292	-93.3887	[-230.006-43.229]	0.1814	0.9129	0.85401	0.0155	0.16305	OpenSea	chr5:142740314
		Brain Imaging	Grey Matter Volume	Cross-Sectional	cg16586394	292	-136.202	[-330.367-57.962]	0.17027	0.9129	0.90913	0.01422	0.19939	OpenSea	chr5:142757011
		Brain Imaging	Grey Matter Volume	Cross-Sectional	cg25535999	292	-68.3431	[-255.902-119.215]	0.47571	0.9982	0.89419	0.01191	0.0902	OpenSea	chr5:142757312
		Brain Imaging	Grey Matter Volume	Cross-Sectional	cg03746860	292	10.2039	[-173.648-194.056]	0.91346	0.9982	0.89502	0.01114	0.14119	OpenSea	chr5:142759375
		Brain Imaging	Grey Matter Volume	Cross-Sectional	cg20598211	292	-3.9231	[-218.606-210.76]	0.97145	0.9982	0.91627	0.01158	0.20941	OpenSea	chr5:142762454
		Brain Imaging	Grey Matter Volume	Cross-Sectional	cg05483455	292	-125.515	[-405.963-154.933]	0.38114	0.9982	0.92855	0.00637	0.07369	OpenSea	chr5:142762613
		Brain Imaging	Grey Matter Volume	Cross-Sectional	cg16594263	292	-220.954	[-502.867-60.958]	0.12563	0.8933	0.91923	0.01644	0.42455	OpenSea	chr5:142768048
		Brain Imaging	Grey Matter Volume	Cross-Sectional	cg16535116	292	-107.983	[-211.523--4.443]	0.04189	0.6423	0.82395	0.0209	0.17773	OpenSea	chr5:142769612
		Brain Imaging	Grey Matter Volume	Cross-Sectional	cg05900547	292	10.7673	[-103.782-125.317]	0.85396	0.9982	0.82362	0.01868	0.15468	OpenSea	chr5:142769791
		Brain Imaging	Grey Matter Volume	Cross-Sectional	cg19432243	292	33.101	[-4.273-70.475]	0.08369	0.8933	0.75237	0.06043	0.89556	OpenSea	chr5:142770757
		Brain Imaging	Grey Matter Volume	Cross-Sectional	cg19820298	292	-8.0175	[-44.483-28.448]	0.66685	0.9982	0.78285	0.05639	0.30689	OpenSea	chr5:142770782
		Brain Imaging	Grey Matter Volume	Cross-Sectional	cg27107893	292	5.119	[-14.322-24.56]	0.6062	0.9982	0.79309	0.09578	0.9445	OpenSea	chr5:142776274
		Brain Imaging	Grey Matter Volume	Cross-Sectional	cg17342132	292	-20.6778	[-119.485-78.129]	0.68199	0.9982	0.86999	0.03297	0.31216	N_Shore	chr5:142780254
		Brain Imaging	Grey Matter Volume	Cross-Sectional	cg07742588	292	28.3963	[-25.232-82.025]	0.30026	0.9982	0.78914	0.05595	0.91885	N_Shore	chr5:142780439
		Brain Imaging	Grey Matter Volume	Cross-Sectional	cg00294552	292	11.1696	[-79.156-101.495]	0.80867	0.9982	0.84207	0.02221	0.20462	N_Shore	chr5:142780486
		Brain Imaging	Grey Matter Volume	Cross-Sectional	cg16219186	292	42.1423	[-72.811-157.096]	0.47303	0.9982	0.88479	0.02148	0.22312	N_Shore	chr5:142780531
		Brain Imaging	Grey Matter Volume	Cross-Sectional	cg08845721	292	0.1309	[-115.784-116.046]	0.99824	0.9982	0.90291	0.02257	0.35006	N_Shore	chr5:142780693
		Brain Imaging	Grey Matter Volume	Cross-Sectional	cg12969488	292	27.1218	[-32.742-86.986]	0.37531	0.9982	0.6959	0.03946	0.36342	N_Shore	chr5:142780984
		Brain Imaging	Grey Matter Volume	Cross-Sectional	cg07733851	292	0.1088	[-34.875-35.092]	0.99514	0.9982	0.31012	0.05444	0.48866	N_Shore	chr5:142781498
		Brain Imaging	Grey Matter Volume	Cross-Sectional	cg27122725	292	36.1355	[-148.938-221.209]	0.70224	0.9982	0.08247	0.03649	0.61758	N_Shore	chr5:142781723
		Brain Imaging	Grey Matter Volume	Cross-Sectional	cg06952416	292	72.5878	[-56.307-201.483]	0.27065	0.9982	0.10317	0.01595	0.14679	N_Shore	chr5:142781736
		Brain Imaging	Grey Matter Volume	Cross-Sectional	cg15910486	292	-80.349	[-250.035-89.337]	0.35417	0.9982	0.06987	0.01223	0.07877	Island	chr5:142783621
		Brain Imaging	Grey Matter Volume	Cross-Sectional	cg01967637	292	-113.777	[-254.891-27.337]	0.11518	0.8933	0.05849	0.01419	0.08687	Island	chr5:142784019
		Brain Imaging	Grey Matter Volume	Cross-Sectional	cg26464411	292	-29.0418	[-181.716-123.632]	0.70956	0.9982	0.0622	0.01192	0.08127	Island	chr5:142784222
		Brain Imaging	Grey Matter Volume	Cross-Sectional	cg06968181	292	-95.1105	[-490.118-299.897]	0.63735	0.9982	0.05291	0.02403	0.66787	Island	chr5:142784323
		Brain Imaging	Grey Matter Volume	Cross-Sectional	cg21702128	292	4.9166	[-197.158-206.991]	0.962	0.9982	0.08227	0.00965	0.07742	Island	chr5:142784721
		Brain Imaging	Grey Matter Volume	Cross-Sectional	cg18718518	292	12.0021	[-29.309-53.313]	0.56952	0.9982	0.53255	0.05217	0.3892	S_Shore	chr5:142785455
		Brain Imaging	Grey Matter Volume	Cross-Sectional	cg13764763	292	19.0001	[-16.321-54.321]	0.29265	0.9982	0.85356	0.05856	0.5219	S_Shore	chr5:142785501
		Brain Imaging	Grey Matter Volume	Cross-Sectional	cg16224829	292	-51.4495	[-112.446-9.547]	0.09942	0.8933	0.79156	0.03531	0.28375	OpenSea	chr5:142792698
		Brain Imaging	Grey Matter Volume	Cross-Sectional	cg01751279	292	-5.1138	[-80.215-69.987]	0.89393	0.9982	0.83882	0.03986	0.35649	OpenSea	chr5:142793924
		Brain Imaging	Grey Matter Volume	Cross-Sectional	cg23430507	292	-70.7553	[-160.073-18.563]	0.12165	0.8933	0.67871	0.03655	0.31636	OpenSea	chr5:142798375
		Brain Imaging	Grey Matter Volume	Cross-Sectional	cg17349736	292	28.8686	[-114.892-172.629]	0.69419	0.9982	0.8687	0.01502	0.1392	OpenSea	chr5:142802329
		Brain Imaging	Grey Matter Volume	Cross-Sectional	cg14438279	292	-72.9125	[-141.02--4.805]	0.03679	0.6423	0.80706	0.05892	0.46785	OpenSea	chr5:142806343
		Brain Imaging	Grey Matter Volume	Cross-Sectional	cg08423118	292	0.2651	[-29.103-29.634]	0.9859	0.9982	0.77492	0.07191	0.32112	OpenSea	chr5:142808610
		Brain Imaging	Grey Matter Volume	Cross-Sectional	cg23776787	292	119.587	[-90.613-329.786]	0.26578	0.9982	0.05181	0.01906	0.42487	OpenSea	chr5:142814315
		Brain Imaging	Grey Matter Volume	Cross-Sectional	cg03906910	292	-11.463	[-76.348-53.422]	0.72941	0.9982	0.22081	0.05239	0.37839	OpenSea	chr5:142814388
		Brain Imaging	Grey Matter Volume	Cross-Sectional	cg07589972	292	83.6915	[-179.475-346.858]	0.53359	0.9982	0.90005	0.01417	0.2547	OpenSea	chr5:142815463
		Brain Imaging	Grey Matter Volume	Cross-Sectional	cg12466613	292	4.0666	[-298.452-306.586]	0.979	0.9982	0.91748	0.01192	0.24478	OpenSea	chr5:142815469
		Brain Imaging	Grey Matter Volume	Cross-Sectional	cg21979215	292	12.9601	[-15.526-41.447]	0.37332	0.9982	0.76917	0.06877	0.39558	OpenSea	chr5:142815807
		Brain Imaging	Grey Matter Volume	Cross-Sectional	cg11022710	292	-7.6933	[-162.329-146.943]	0.92239	0.9982	0.90751	0.01966	0.20763	OpenSea	chr5:142820479
		Brain Imaging	Grey Matter Volume	Longitudinal	cg23650353	126	-12.3006	[-28.472-3.871]	0.13887	0.6562	0.92108	0.028	0.43394	OpenSea	chr4:148993643
		Brain Imaging	Grey Matter Volume	Longitudinal	cg19491599	126	-8.9592	[-21.922-4.004]	0.17832	0.6562	0.84529	0.0161	0.20857	OpenSea	chr4:149000607
		Brain Imaging	Grey Matter Volume	Longitudinal	cg10207656	126	0.8374	[-15.047-16.722]	0.9179	0.9655	0.90855	0.01373	0.20071	OpenSea	chr4:149019526
		Brain Imaging	Grey Matter Volume	Longitudinal	cg09143276	126	5.9622	[-2.192-14.117]	0.15468	0.6562	0.80845	0.02074	0.13091	OpenSea	chr4:149066518
		Brain Imaging	Grey Matter Volume	Longitudinal	cg13000004	126	0.3586	[-16.669-17.386]	0.96715	0.9731	0.86983	0.01161	0.09813	OpenSea	chr4:149074093
		Brain Imaging	Grey Matter Volume	Longitudinal	cg10590842	126	-4.284	[-20.836-12.268]	0.61296	0.8957	0.9034	0.01143	0.10122	OpenSea	chr4:149083955
		Brain Imaging	Grey Matter Volume	Longitudinal	cg21701890	126	7.1349	[-1.627-15.897]	0.11335	0.6562	0.61622	0.02898	0.23369	OpenSea	chr4:149094632
		Brain Imaging	Grey Matter Volume	Longitudinal	cg27234800	126	-0.2653	[-3.703-3.172]	0.88007	0.9655	0.89127	0.0525	0.39493	OpenSea	chr4:149116611
		Brain Imaging	Grey Matter Volume	Longitudinal	cg25672354	126	2.4038	[-8.347-13.154]	0.66206	0.8957	0.86697	0.01933	0.23574	OpenSea	chr4:149122383
		Brain Imaging	Grey Matter Volume	Longitudinal	cg10993059	126	0.8524	[-15.087-16.791]	0.91672	0.9655	0.892	0.014	0.24786	OpenSea	chr4:149123062
		Brain Imaging	Grey Matter Volume	Longitudinal	cg07335874	126	-0.7958	[-19.593-18.001]	0.93402	0.9655	0.89734	0.01678	0.25463	OpenSea	chr4:149136507
		Brain Imaging	Grey Matter Volume	Longitudinal	cg08264907	126	-17.2067	[-41.85-7.437]	0.17394	0.6562	0.90365	0.00834	0.08404	OpenSea	chr4:149144045
		Brain Imaging	Grey Matter Volume	Longitudinal	cg07275757	126	5.3536	[-12.102-22.81]	0.549	0.8957	0.89578	0.01331	0.13086	OpenSea	chr4:149189974
		Brain Imaging	Grey Matter Volume	Longitudinal	cg13157799	126	-3.1265	[-23.968-17.715]	0.76929	0.9564	0.05908	0.01227	0.14832	OpenSea	chr4:149191991
		Brain Imaging	Grey Matter Volume	Longitudinal	cg00328411	126	-8.1623	[-32.658-16.333]	0.51505	0.8957	0.90656	0.00839	0.10838	OpenSea	chr4:149205617
		Brain Imaging	Grey Matter Volume	Longitudinal	cg02471166	126	0.6208	[-7.223-8.465]	0.87702	0.9655	0.62905	0.02431	0.28086	OpenSea	chr4:149244985
		Brain Imaging	Grey Matter Volume	Longitudinal	cg27225476	126	-9.6186	[-21.194-1.957]	0.10624	0.6562	0.85878	0.01502	0.11725	OpenSea	chr4:149275542
		Brain Imaging	Grey Matter Volume	Longitudinal	cg06240648	126	15.2153	[-6.469-36.9]	0.17184	0.6562	0.90857	0.00875	0.08216	OpenSea	chr4:149289762
		Brain Imaging	Grey Matter Volume	Longitudinal	cg04867484	126	0.6797	[-8.839-10.198]	0.88895	0.9655	0.06179	0.03171	0.6046	OpenSea	chr4:149297469
		Brain Imaging	Grey Matter Volume	Longitudinal	cg19496136	126	1.8892	[-2.594-6.373]	0.41064	0.8403	0.74636	0.06158	0.84904	OpenSea	chr4:149336765
		Brain Imaging	Grey Matter Volume	Longitudinal	cg17253842	126	-5.4217	[-19.205-8.361]	0.44237	0.8507	0.87057	0.02004	0.40157	OpenSea	chr4:149347991
		Brain Imaging	Grey Matter Volume	Longitudinal	cg19650300	126	-4.8691	[-19.824-10.086]	0.52471	0.8957	0.87161	0.0124	0.12937	OpenSea	chr4:149357960
		Brain Imaging	Grey Matter Volume	Longitudinal	cg09238384	126	11.8888	[-2.755-26.532]	0.11441	0.6562	0.88033	0.01059	0.10479	OpenSea	chr4:149358199
		Brain Imaging	Grey Matter Volume	Longitudinal	cg07651033	126	-3.8758	[-18.144-10.392]	0.59551	0.8957	0.891	0.01412	0.08448	OpenSea	chr4:149359043
		Brain Imaging	Grey Matter Volume	Longitudinal	cg23329208	126	3.8978	[-14.63-22.426]	0.6809	0.9079	0.89218	0.01003	0.08891	N_Shelf	chr4:149360981
		Brain Imaging	Grey Matter Volume	Longitudinal	cg05437692	126	5.3115	[-1.017-11.64]	0.10283	0.6562	0.28837	0.04393	0.32226	N_Shore	chr4:149362435
		Brain Imaging	Grey Matter Volume	Longitudinal	cg27460943	126	9.0017	[-1.819-19.822]	0.10585	0.6562	0.08292	0.02603	0.31306	N_Shore	chr4:149362809
		Brain Imaging	Grey Matter Volume	Longitudinal	cg01576854	126	11.5699	[-7.487-30.627]	0.23663	0.7023	0.07386	0.01207	0.20464	Island	chr4:149363450
		Brain Imaging	Grey Matter Volume	Longitudinal	cg13996731	126	14.2637	[-5.037-33.565]	0.15034	0.6562	0.05943	0.00984	0.12921	Island	chr4:149363522
		Brain Imaging	Grey Matter Volume	Longitudinal	cg20140452	126	0.9921	[-18.307-20.291]	0.91993	0.9655	0.07045	0.00971	0.0619	Island	chr4:149363715
		Brain Imaging	Grey Matter Volume	Longitudinal	cg10621979	126	10.3665	[-11.598-32.332]	0.35697	0.8403	0.05355	0.018	0.29521	Island	chr4:149365824
		Brain Imaging	Grey Matter Volume	Longitudinal	cg11239219	126	10.7098	[-6.189-27.609]	0.21682	0.671	0.05479	0.02153	0.3658	Island	chr4:149365887
		Brain Imaging	Grey Matter Volume	Longitudinal	cg10002915	126	1.0315	[-1.333-3.396]	0.39441	0.8403	0.54242	0.08455	0.73095	S_Shelf	chr4:149369175
		Brain Imaging	Grey Matter Volume	Longitudinal	cg15374100	126	2.2805	[-14.24-18.801]	0.78724	0.9635	0.86961	0.01354	0.2065	OpenSea	chr5:142651239
		Brain Imaging	Grey Matter Volume	Longitudinal	cg15740681	126	18.4203	[-3.846-40.687]	0.10778	0.6562	0.89095	0.00925	0.09622	OpenSea	chr5:142653066
		Brain Imaging	Grey Matter Volume	Longitudinal	cg26081259	126	1.5058	[-22.759-25.771]	0.90341	0.9655	0.92585	0.00714	0.05144	OpenSea	chr5:142659682
		Brain Imaging	Grey Matter Volume	Longitudinal	cg13514002	126	-2.3059	[-19.739-15.127]	0.79592	0.9635	0.9104	0.01216	0.16497	OpenSea	chr5:142677292
		Brain Imaging	Grey Matter Volume	Longitudinal	cg24801588	126	4.3894	[-13.83-22.609]	0.63772	0.8957	0.87613	0.01121	0.08119	OpenSea	chr5:142689858
		Brain Imaging	Grey Matter Volume	Longitudinal	cg00407401	126	-6.7884	[-24.216-10.64]	0.44684	0.8507	0.88336	0.0113	0.12225	OpenSea	chr5:142690959
		Brain Imaging	Grey Matter Volume	Longitudinal	cg19457823	126	-5.3237	[-16.9-6.253]	0.36937	0.8403	0.85324	0.04572	0.44993	OpenSea	chr5:142692961
		Brain Imaging	Grey Matter Volume	Longitudinal	cg12741214	126	-11.0716	[-34.817-12.674]	0.36279	0.8403	0.92153	0.00739	0.05446	OpenSea	chr5:142695619
		Brain Imaging	Grey Matter Volume	Longitudinal	cg04457787	126	-11.7545	[-34.38-10.871]	0.31079	0.8403	0.91851	0.00864	0.10367	OpenSea	chr5:142695636
		Brain Imaging	Grey Matter Volume	Longitudinal	cg20728768	126	4.6057	[-0.337-9.548]	0.07051	0.6562	0.28495	0.05593	0.42144	OpenSea	chr5:142696594
		Brain Imaging	Grey Matter Volume	Longitudinal	cg25708981	126	-5.3961	[-11.323-0.531]	0.07712	0.6562	0.81142	0.04619	0.93615	OpenSea	chr5:142697868
		Brain Imaging	Grey Matter Volume	Longitudinal	cg19645279	126	3.1023	[-2.435-8.64]	0.27455	0.7893	0.50627	0.03156	0.23017	OpenSea	chr5:142702733
		Brain Imaging	Grey Matter Volume	Longitudinal	cg19176661	126	-11.5263	[-27.948-4.895]	0.1717	0.6562	0.90339	0.00908	0.09406	OpenSea	chr5:142718549
		Brain Imaging	Grey Matter Volume	Longitudinal	cg07715663	126	0.419	[-23.898-24.736]	0.97312	0.9731	0.89993	0.0077	0.06068	OpenSea	chr5:142721796
		Brain Imaging	Grey Matter Volume	Longitudinal	cg24052866	126	1.1615	[-3.89-6.213]	0.65311	0.8957	0.69336	0.03805	0.44354	OpenSea	chr5:142727470
		Brain Imaging	Grey Matter Volume	Longitudinal	cg22233604	126	7.5544	[-2.529-17.638]	0.14485	0.6562	0.80239	0.02828	0.34628	OpenSea	chr5:142729377
		Brain Imaging	Grey Matter Volume	Longitudinal	cg03857453	126	2.3878	[-3.828-8.603]	0.45309	0.8507	0.71757	0.04588	0.42058	OpenSea	chr5:142729913
		Brain Imaging	Grey Matter Volume	Longitudinal	cg15115787	126	2.0118	[-5.174-9.197]	0.58428	0.8957	0.2334	0.0467	0.33835	OpenSea	chr5:142730701
		Brain Imaging	Grey Matter Volume	Longitudinal	cg12888360	126	-1.3367	[-7.227-4.553]	0.65733	0.8957	0.19071	0.0335	0.21819	OpenSea	chr5:142732502
		Brain Imaging	Grey Matter Volume	Longitudinal	cg18484679	126	3.3927	[-11.055-17.84]	0.64624	0.8957	0.85401	0.0155	0.16305	OpenSea	chr5:142740314
		Brain Imaging	Grey Matter Volume	Longitudinal	cg16586394	126	-10.6242	[-26.831-5.583]	0.20155	0.6622	0.90913	0.01422	0.19939	OpenSea	chr5:142757011
		Brain Imaging	Grey Matter Volume	Longitudinal	cg25535999	126	-12.8845	[-33.303-7.534]	0.2188	0.671	0.89419	0.01191	0.0902	OpenSea	chr5:142757312
		Brain Imaging	Grey Matter Volume	Longitudinal	cg03746860	126	3.1901	[-13.983-20.363]	0.71648	0.9155	0.89502	0.01114	0.14119	OpenSea	chr5:142759375
		Brain Imaging	Grey Matter Volume	Longitudinal	cg20598211	126	-9.0475	[-29.054-10.959]	0.37735	0.8403	0.91627	0.01158	0.20941	OpenSea	chr5:142762454
		Brain Imaging	Grey Matter Volume	Longitudinal	cg05483455	126	1.4368	[-24.534-27.408]	0.91385	0.9655	0.92855	0.00637	0.07369	OpenSea	chr5:142762613
		Brain Imaging	Grey Matter Volume	Longitudinal	cg16594263	126	-11.9822	[-38.524-14.56]	0.37818	0.8403	0.91923	0.01644	0.42455	OpenSea	chr5:142768048
		Brain Imaging	Grey Matter Volume	Longitudinal	cg16535116	126	4.1014	[-5.221-13.424]	0.39039	0.8403	0.82395	0.0209	0.17773	OpenSea	chr5:142769612
		Brain Imaging	Grey Matter Volume	Longitudinal	cg05900547	126	7.6598	[-2.731-18.05]	0.15132	0.6562	0.82362	0.01868	0.15468	OpenSea	chr5:142769791
		Brain Imaging	Grey Matter Volume	Longitudinal	cg19432243	126	1.6764	[-2.02-5.372]	0.37593	0.8403	0.75237	0.06043	0.89556	OpenSea	chr5:142770757
		Brain Imaging	Grey Matter Volume	Longitudinal	cg19820298	126	1.6531	[-1.78-5.086]	0.34735	0.8403	0.78285	0.05639	0.30689	OpenSea	chr5:142770782
		Brain Imaging	Grey Matter Volume	Longitudinal	cg27107893	126	-0.4942	[-3.086-2.097]	0.7093	0.9155	0.79309	0.09578	0.9445	OpenSea	chr5:142776274
		Brain Imaging	Grey Matter Volume	Longitudinal	cg17342132	126	-7.3068	[-16.101-1.487]	0.10628	0.6562	0.86999	0.03297	0.31216	N_Shore	chr5:142780254
		Brain Imaging	Grey Matter Volume	Longitudinal	cg07742588	126	1.3116	[-3.568-6.191]	0.59934	0.8957	0.78914	0.05595	0.91885	N_Shore	chr5:142780439
		Brain Imaging	Grey Matter Volume	Longitudinal	cg00294552	126	-2.4386	[-10.028-5.151]	0.53017	0.8957	0.84207	0.02221	0.20462	N_Shore	chr5:142780486
		Brain Imaging	Grey Matter Volume	Longitudinal	cg16219186	126	-15.0858	[-25.662--4.509]	0.00611	0.2813	0.88479	0.02148	0.22312	N_Shore	chr5:142780531
		Brain Imaging	Grey Matter Volume	Longitudinal	cg08845721	126	-9.8269	[-20.286-0.632]	0.06824	0.6562	0.90291	0.02257	0.35006	N_Shore	chr5:142780693
		Brain Imaging	Grey Matter Volume	Longitudinal	cg12969488	126	1.5108	[-4.415-7.437]	0.61828	0.8957	0.6959	0.03946	0.36342	N_Shore	chr5:142780984
		Brain Imaging	Grey Matter Volume	Longitudinal	cg07733851	126	0.7391	[-2.964-4.442]	0.69637	0.9152	0.31012	0.05444	0.48866	N_Shore	chr5:142781498
		Brain Imaging	Grey Matter Volume	Longitudinal	cg27122725	126	-4.6235	[-23.034-13.787]	0.62354	0.8957	0.08247	0.03649	0.61758	N_Shore	chr5:142781723
		Brain Imaging	Grey Matter Volume	Longitudinal	cg06952416	126	4.7319	[-6.507-15.971]	0.41103	0.8403	0.10317	0.01595	0.14679	N_Shore	chr5:142781736
		Brain Imaging	Grey Matter Volume	Longitudinal	cg15910486	126	1.7654	[-14.052-17.583]	0.82724	0.9655	0.06987	0.01223	0.07877	Island	chr5:142783621
		Brain Imaging	Grey Matter Volume	Longitudinal	cg01967637	126	-15.2963	[-29.515--1.078]	0.03725	0.6562	0.05849	0.01419	0.08687	Island	chr5:142784019
		Brain Imaging	Grey Matter Volume	Longitudinal	cg26464411	126	-7.2694	[-21.533-6.994]	0.32003	0.8403	0.0622	0.01192	0.08127	Island	chr5:142784222
		Brain Imaging	Grey Matter Volume	Longitudinal	cg06968181	126	-36.4808	[-71.867--1.095]	0.04575	0.6562	0.05291	0.02403	0.66787	Island	chr5:142784323
		Brain Imaging	Grey Matter Volume	Longitudinal	cg21702128	126	20.0438	[2.742-37.346]	0.02512	0.6562	0.08227	0.00965	0.07742	Island	chr5:142784721
		Brain Imaging	Grey Matter Volume	Longitudinal	cg18718518	126	1.377	[-2.962-5.716]	0.53517	0.8957	0.53255	0.05217	0.3892	S_Shore	chr5:142785455
		Brain Imaging	Grey Matter Volume	Longitudinal	cg13764763	126	-2.8992	[-7.294-1.496]	0.19872	0.6622	0.85356	0.05856	0.5219	S_Shore	chr5:142785501
		Brain Imaging	Grey Matter Volume	Longitudinal	cg16224829	126	-1.6504	[-7.399-4.099]	0.57481	0.8957	0.79156	0.03531	0.28375	OpenSea	chr5:142792698
		Brain Imaging	Grey Matter Volume	Longitudinal	cg01751279	126	1.6162	[-4.933-8.165]	0.62957	0.8957	0.83882	0.03986	0.35649	OpenSea	chr5:142793924
		Brain Imaging	Grey Matter Volume	Longitudinal	cg23430507	126	0.4578	[-9.285-10.201]	0.9268	0.9655	0.67871	0.03655	0.31636	OpenSea	chr5:142798375
		Brain Imaging	Grey Matter Volume	Longitudinal	cg17349736	126	5.8181	[-8.91-20.546]	0.44044	0.8507	0.8687	0.01502	0.1392	OpenSea	chr5:142802329
		Brain Imaging	Grey Matter Volume	Longitudinal	cg14438279	126	0.7109	[-5.44-6.862]	0.82122	0.9655	0.80706	0.05892	0.46785	OpenSea	chr5:142806343
		Brain Imaging	Grey Matter Volume	Longitudinal	cg08423118	126	0.4343	[-2.216-3.084]	0.74865	0.9435	0.77492	0.07191	0.32112	OpenSea	chr5:142808610
		Brain Imaging	Grey Matter Volume	Longitudinal	cg23776787	126	-31.8193	[-50.702--12.936]	0.00129	0.1189	0.05181	0.01906	0.42487	OpenSea	chr5:142814315
		Brain Imaging	Grey Matter Volume	Longitudinal	cg03906910	126	-2.3612	[-9.538-4.815]	0.52035	0.8957	0.22081	0.05239	0.37839	OpenSea	chr5:142814388
		Brain Imaging	Grey Matter Volume	Longitudinal	cg07589972	126	-20.3958	[-45.421-4.63]	0.11304	0.6562	0.90005	0.01417	0.2547	OpenSea	chr5:142815463
		Brain Imaging	Grey Matter Volume	Longitudinal	cg12466613	126	-19.9759	[-49.464-9.512]	0.187	0.6617	0.91748	0.01192	0.24478	OpenSea	chr5:142815469
		Brain Imaging	Grey Matter Volume	Longitudinal	cg21979215	126	-0.149	[-2.744-2.446]	0.91059	0.9655	0.76917	0.06877	0.39558	OpenSea	chr5:142815807
		Brain Imaging	Grey Matter Volume	Longitudinal	cg11022710	126	-0.4624	[-15.497-14.573]	0.95204	0.9731	0.90751	0.01966	0.20763	OpenSea	chr5:142820479
		Brain Imaging	Hippocampal Volume	Cross-Sectional	cg23650353	292	0.522	[-2.189-3.234]	0.7062	0.9267	0.92108	0.028	0.43394	OpenSea	chr4:148993643
		Brain Imaging	Hippocampal Volume	Cross-Sectional	cg19491599	292	-0.7344	[-2.974-1.505]	0.52085	0.914	0.84529	0.0161	0.20857	OpenSea	chr4:149000607
		Brain Imaging	Hippocampal Volume	Cross-Sectional	cg10207656	292	1.1568	[-1.692-4.006]	0.4268	0.876	0.90855	0.01373	0.20071	OpenSea	chr4:149019526
		Brain Imaging	Hippocampal Volume	Cross-Sectional	cg09143276	292	0.8789	[-0.644-2.402]	0.25906	0.876	0.80845	0.02074	0.13091	OpenSea	chr4:149066518
		Brain Imaging	Hippocampal Volume	Cross-Sectional	cg13000004	292	1.235	[-1.603-4.073]	0.39445	0.876	0.86983	0.01161	0.09813	OpenSea	chr4:149074093
		Brain Imaging	Hippocampal Volume	Cross-Sectional	cg10590842	292	0.5051	[-2.645-3.655]	0.75355	0.9267	0.9034	0.01143	0.10122	OpenSea	chr4:149083955
		Brain Imaging	Hippocampal Volume	Cross-Sectional	cg21701890	292	0.6001	[-0.848-2.048]	0.41726	0.876	0.61622	0.02898	0.23369	OpenSea	chr4:149094632
		Brain Imaging	Hippocampal Volume	Cross-Sectional	cg27234800	292	0.3506	[-0.183-0.884]	0.19903	0.876	0.89127	0.0525	0.39493	OpenSea	chr4:149116611
		Brain Imaging	Hippocampal Volume	Cross-Sectional	cg25672354	292	0.8332	[-1.062-2.729]	0.38969	0.876	0.86697	0.01933	0.23574	OpenSea	chr4:149122383
		Brain Imaging	Hippocampal Volume	Cross-Sectional	cg10993059	292	-0.0103	[-2.83-2.81]	0.99428	0.9986	0.892	0.014	0.24786	OpenSea	chr4:149123062
		Brain Imaging	Hippocampal Volume	Cross-Sectional	cg07335874	292	-0.0027	[-2.962-2.956]	0.99857	0.9986	0.89734	0.01678	0.25463	OpenSea	chr4:149136507
		Brain Imaging	Hippocampal Volume	Cross-Sectional	cg08264907	292	0.8997	[-3.084-4.883]	0.65831	0.9267	0.90365	0.00834	0.08404	OpenSea	chr4:149144045
		Brain Imaging	Hippocampal Volume	Cross-Sectional	cg07275757	292	1.1181	[-1.866-4.102]	0.46332	0.885	0.89578	0.01331	0.13086	OpenSea	chr4:149189974
		Brain Imaging	Hippocampal Volume	Cross-Sectional	cg13157799	292	-1.6857	[-4.772-1.401]	0.28531	0.876	0.05908	0.01227	0.14832	OpenSea	chr4:149191991
		Brain Imaging	Hippocampal Volume	Cross-Sectional	cg00328411	292	-2.0829	[-6.116-1.951]	0.31234	0.876	0.90656	0.00839	0.10838	OpenSea	chr4:149205617
		Brain Imaging	Hippocampal Volume	Cross-Sectional	cg02471166	292	-0.2492	[-1.591-1.092]	0.71601	0.9267	0.62905	0.02431	0.28086	OpenSea	chr4:149244985
		Brain Imaging	Hippocampal Volume	Cross-Sectional	cg27225476	292	-0.3308	[-2.276-1.614]	0.7391	0.9267	0.85878	0.01502	0.11725	OpenSea	chr4:149275542
		Brain Imaging	Hippocampal Volume	Cross-Sectional	cg06240648	292	1.153	[-2.589-4.895]	0.54642	0.914	0.90857	0.00875	0.08216	OpenSea	chr4:149289762
		Brain Imaging	Hippocampal Volume	Cross-Sectional	cg04867484	292	0.1375	[-1.635-1.91]	0.87931	0.9702	0.06179	0.03171	0.6046	OpenSea	chr4:149297469
		Brain Imaging	Hippocampal Volume	Cross-Sectional	cg19496136	292	0.157	[-0.685-0.999]	0.71514	0.9267	0.74636	0.06158	0.84904	OpenSea	chr4:149336765
		Brain Imaging	Hippocampal Volume	Cross-Sectional	cg17253842	292	2.3135	[0.161-4.466]	0.03606	0.876	0.87057	0.02004	0.40157	OpenSea	chr4:149347991
		Brain Imaging	Hippocampal Volume	Cross-Sectional	cg19650300	292	-0.0384	[-2.682-2.605]	0.97731	0.9986	0.87161	0.0124	0.12937	OpenSea	chr4:149357960
		Brain Imaging	Hippocampal Volume	Cross-Sectional	cg09238384	292	0.6455	[-2.175-3.466]	0.65412	0.9267	0.88033	0.01059	0.10479	OpenSea	chr4:149358199
		Brain Imaging	Hippocampal Volume	Cross-Sectional	cg07651033	292	-0.4707	[-2.63-1.689]	0.66955	0.9267	0.891	0.01412	0.08448	OpenSea	chr4:149359043
		Brain Imaging	Hippocampal Volume	Cross-Sectional	cg23329208	292	-1.4349	[-4.483-1.613]	0.35688	0.876	0.89218	0.01003	0.08891	N_Shelf	chr4:149360981
		Brain Imaging	Hippocampal Volume	Cross-Sectional	cg05437692	292	0.4474	[-0.656-1.551]	0.42758	0.876	0.28837	0.04393	0.32226	N_Shore	chr4:149362435
		Brain Imaging	Hippocampal Volume	Cross-Sectional	cg27460943	292	0.8629	[-0.931-2.657]	0.34661	0.876	0.08292	0.02603	0.31306	N_Shore	chr4:149362809
		Brain Imaging	Hippocampal Volume	Cross-Sectional	cg01576854	292	-1.1738	[-4.364-2.016]	0.47135	0.885	0.07386	0.01207	0.20464	Island	chr4:149363450
		Brain Imaging	Hippocampal Volume	Cross-Sectional	cg13996731	292	-0.2598	[-3.708-3.188]	0.88268	0.9702	0.05943	0.00984	0.12921	Island	chr4:149363522
		Brain Imaging	Hippocampal Volume	Cross-Sectional	cg20140452	292	0.8947	[-2.379-4.168]	0.59265	0.9241	0.07045	0.00971	0.0619	Island	chr4:149363715
		Brain Imaging	Hippocampal Volume	Cross-Sectional	cg10621979	292	0.2503	[-2.999-3.499]	0.88009	0.9702	0.05355	0.018	0.29521	Island	chr4:149365824
		Brain Imaging	Hippocampal Volume	Cross-Sectional	cg11239219	292	-0.707	[-3.724-2.31]	0.64632	0.9267	0.05479	0.02153	0.3658	Island	chr4:149365887
		Brain Imaging	Hippocampal Volume	Cross-Sectional	cg10002915	292	0.3049	[-0.085-0.695]	0.1269	0.876	0.54242	0.08455	0.73095	S_Shelf	chr4:149369175
		Brain Imaging	Hippocampal Volume	Cross-Sectional	cg15374100	292	-0.5612	[-3.269-2.146]	0.68488	0.9267	0.86961	0.01354	0.2065	OpenSea	chr5:142651239
		Brain Imaging	Hippocampal Volume	Cross-Sectional	cg15740681	292	0.5089	[-3.143-4.16]	0.78493	0.9281	0.89095	0.00925	0.09622	OpenSea	chr5:142653066
		Brain Imaging	Hippocampal Volume	Cross-Sectional	cg26081259	292	-0.6619	[-4.823-3.499]	0.75545	0.9267	0.92585	0.00714	0.05144	OpenSea	chr5:142659682
		Brain Imaging	Hippocampal Volume	Cross-Sectional	cg13514002	292	0.9155	[-2.041-3.871]	0.54434	0.914	0.9104	0.01216	0.16497	OpenSea	chr5:142677292
		Brain Imaging	Hippocampal Volume	Cross-Sectional	cg24801588	292	0.3448	[-2.513-3.202]	0.8132	0.947	0.87613	0.01121	0.08119	OpenSea	chr5:142689858
		Brain Imaging	Hippocampal Volume	Cross-Sectional	cg00407401	292	0.8026	[-2.271-3.876]	0.60916	0.9267	0.88336	0.0113	0.12225	OpenSea	chr5:142690959
		Brain Imaging	Hippocampal Volume	Cross-Sectional	cg19457823	292	0.3198	[-0.364-1.004]	0.36039	0.876	0.85324	0.04572	0.44993	OpenSea	chr5:142692961
		Brain Imaging	Hippocampal Volume	Cross-Sectional	cg12741214	292	-1.3274	[-5.491-2.836]	0.53258	0.914	0.92153	0.00739	0.05446	OpenSea	chr5:142695619
		Brain Imaging	Hippocampal Volume	Cross-Sectional	cg04457787	292	-3.7607	[-7.642-0.12]	0.05857	0.876	0.91851	0.00864	0.10367	OpenSea	chr5:142695636
		Brain Imaging	Hippocampal Volume	Cross-Sectional	cg20728768	292	-0.1282	[-1.057-0.8]	0.78686	0.9281	0.28495	0.05593	0.42144	OpenSea	chr5:142696594
		Brain Imaging	Hippocampal Volume	Cross-Sectional	cg25708981	292	-1.3714	[-2.258--0.485]	0.00265	0.2437	0.81142	0.04619	0.93615	OpenSea	chr5:142697868
		Brain Imaging	Hippocampal Volume	Cross-Sectional	cg19645279	292	0.316	[-0.705-1.337]	0.54479	0.914	0.50627	0.03156	0.23017	OpenSea	chr5:142702733
		Brain Imaging	Hippocampal Volume	Cross-Sectional	cg19176661	292	-2.9162	[-6.027-0.195]	0.06726	0.876	0.90339	0.00908	0.09406	OpenSea	chr5:142718549
		Brain Imaging	Hippocampal Volume	Cross-Sectional	cg07715663	292	-1.221	[-5.3-2.858]	0.55784	0.9165	0.89993	0.0077	0.06068	OpenSea	chr5:142721796
		Brain Imaging	Hippocampal Volume	Cross-Sectional	cg24052866	292	0.0545	[-0.859-0.968]	0.90697	0.9702	0.69336	0.03805	0.44354	OpenSea	chr5:142727470
		Brain Imaging	Hippocampal Volume	Cross-Sectional	cg22233604	292	1.496	[-0.123-3.115]	0.0712	0.876	0.80239	0.02828	0.34628	OpenSea	chr5:142729377
		Brain Imaging	Hippocampal Volume	Cross-Sectional	cg03857453	292	0.2068	[-0.745-1.158]	0.67047	0.9267	0.71757	0.04588	0.42058	OpenSea	chr5:142729913
		Brain Imaging	Hippocampal Volume	Cross-Sectional	cg15115787	292	-0.3914	[-1.553-0.77]	0.50938	0.914	0.2334	0.0467	0.33835	OpenSea	chr5:142730701
		Brain Imaging	Hippocampal Volume	Cross-Sectional	cg12888360	292	-0.039	[-1.039-0.961]	0.93905	0.9854	0.19071	0.0335	0.21819	OpenSea	chr5:142732502
		Brain Imaging	Hippocampal Volume	Cross-Sectional	cg18484679	292	-1.4043	[-3.581-0.772]	0.20706	0.876	0.85401	0.0155	0.16305	OpenSea	chr5:142740314
		Brain Imaging	Hippocampal Volume	Cross-Sectional	cg16586394	292	-1.7178	[-4.814-1.378]	0.27778	0.876	0.90913	0.01422	0.19939	OpenSea	chr5:142757011
		Brain Imaging	Hippocampal Volume	Cross-Sectional	cg25535999	292	-1.2169	[-4.203-1.769]	0.42514	0.876	0.89419	0.01191	0.0902	OpenSea	chr5:142757312
		Brain Imaging	Hippocampal Volume	Cross-Sectional	cg03746860	292	1.1833	[-1.741-4.108]	0.42847	0.876	0.89502	0.01114	0.14119	OpenSea	chr5:142759375
		Brain Imaging	Hippocampal Volume	Cross-Sectional	cg20598211	292	-0.9348	[-4.352-2.482]	0.59225	0.9241	0.91627	0.01158	0.20941	OpenSea	chr5:142762454
		Brain Imaging	Hippocampal Volume	Cross-Sectional	cg05483455	292	-1.8719	[-6.339-2.595]	0.41216	0.876	0.92855	0.00637	0.07369	OpenSea	chr5:142762613
		Brain Imaging	Hippocampal Volume	Cross-Sectional	cg16594263	292	-0.136	[-4.645-4.373]	0.95289	0.9854	0.91923	0.01644	0.42455	OpenSea	chr5:142768048
		Brain Imaging	Hippocampal Volume	Cross-Sectional	cg16535116	292	-0.8477	[-2.506-0.811]	0.31725	0.876	0.82395	0.0209	0.17773	OpenSea	chr5:142769612
		Brain Imaging	Hippocampal Volume	Cross-Sectional	cg05900547	292	1.2173	[-0.601-3.036]	0.19066	0.876	0.82362	0.01868	0.15468	OpenSea	chr5:142769791
		Brain Imaging	Hippocampal Volume	Cross-Sectional	cg19432243	292	0.4727	[-0.123-1.069]	0.12106	0.876	0.75237	0.06043	0.89556	OpenSea	chr5:142770757
		Brain Imaging	Hippocampal Volume	Cross-Sectional	cg19820298	292	-0.5646	[-1.142-0.013]	0.05621	0.876	0.78285	0.05639	0.30689	OpenSea	chr5:142770782
		Brain Imaging	Hippocampal Volume	Cross-Sectional	cg27107893	292	0.1547	[-0.154-0.464]	0.32755	0.876	0.79309	0.09578	0.9445	OpenSea	chr5:142776274
		Brain Imaging	Hippocampal Volume	Cross-Sectional	cg17342132	292	-1.1952	[-2.763-0.373]	0.13625	0.876	0.86999	0.03297	0.31216	N_Shore	chr5:142780254
		Brain Imaging	Hippocampal Volume	Cross-Sectional	cg07742588	292	0.6157	[-0.237-1.468]	0.15811	0.876	0.78914	0.05595	0.91885	N_Shore	chr5:142780439
		Brain Imaging	Hippocampal Volume	Cross-Sectional	cg00294552	292	0.6885	[-0.748-2.125]	0.34825	0.876	0.84207	0.02221	0.20462	N_Shore	chr5:142780486
		Brain Imaging	Hippocampal Volume	Cross-Sectional	cg16219186	292	0.7406	[-1.09-2.571]	0.42838	0.876	0.88479	0.02148	0.22312	N_Shore	chr5:142780531
		Brain Imaging	Hippocampal Volume	Cross-Sectional	cg08845721	292	-1.6558	[-3.491-0.18]	0.07816	0.876	0.90291	0.02257	0.35006	N_Shore	chr5:142780693
		Brain Imaging	Hippocampal Volume	Cross-Sectional	cg12969488	292	0.2263	[-0.728-1.181]	0.64251	0.9267	0.6959	0.03946	0.36342	N_Shore	chr5:142780984
		Brain Imaging	Hippocampal Volume	Cross-Sectional	cg07733851	292	0.4427	[-0.112-0.997]	0.11888	0.876	0.31012	0.05444	0.48866	N_Shore	chr5:142781498
		Brain Imaging	Hippocampal Volume	Cross-Sectional	cg27122725	292	-0.4968	[-3.444-2.451]	0.74138	0.9267	0.08247	0.03649	0.61758	N_Shore	chr5:142781723
		Brain Imaging	Hippocampal Volume	Cross-Sectional	cg06952416	292	-1.2004	[-3.253-0.852]	0.25261	0.876	0.10317	0.01595	0.14679	N_Shore	chr5:142781736
		Brain Imaging	Hippocampal Volume	Cross-Sectional	cg15910486	292	-0.9986	[-3.703-1.705]	0.46975	0.885	0.06987	0.01223	0.07877	Island	chr5:142783621
		Brain Imaging	Hippocampal Volume	Cross-Sectional	cg01967637	292	0.1433	[-2.114-2.401]	0.9011	0.9702	0.05849	0.01419	0.08687	Island	chr5:142784019
		Brain Imaging	Hippocampal Volume	Cross-Sectional	cg26464411	292	0.2365	[-2.195-2.668]	0.84896	0.9702	0.0622	0.01192	0.08127	Island	chr5:142784222
		Brain Imaging	Hippocampal Volume	Cross-Sectional	cg06968181	292	-1.0125	[-7.304-5.28]	0.7527	0.9267	0.05291	0.02403	0.66787	Island	chr5:142784323
		Brain Imaging	Hippocampal Volume	Cross-Sectional	cg21702128	292	-1.2077	[-4.423-2.007]	0.46218	0.885	0.08227	0.00965	0.07742	Island	chr5:142784721
		Brain Imaging	Hippocampal Volume	Cross-Sectional	cg18718518	292	0.0459	[-0.612-0.704]	0.89149	0.9702	0.53255	0.05217	0.3892	S_Shore	chr5:142785455
		Brain Imaging	Hippocampal Volume	Cross-Sectional	cg13764763	292	0.3297	[-0.233-0.892]	0.25151	0.876	0.85356	0.05856	0.5219	S_Shore	chr5:142785501
		Brain Imaging	Hippocampal Volume	Cross-Sectional	cg16224829	292	-0.6197	[-1.593-0.354]	0.21319	0.876	0.79156	0.03531	0.28375	OpenSea	chr5:142792698
		Brain Imaging	Hippocampal Volume	Cross-Sectional	cg01751279	292	-0.0358	[-1.232-1.16]	0.95325	0.9854	0.83882	0.03986	0.35649	OpenSea	chr5:142793924
		Brain Imaging	Hippocampal Volume	Cross-Sectional	cg23430507	292	0.2024	[-1.226-1.631]	0.78143	0.9281	0.67871	0.03655	0.31636	OpenSea	chr5:142798375
		Brain Imaging	Hippocampal Volume	Cross-Sectional	cg17349736	292	1.2886	[-0.996-3.574]	0.26998	0.876	0.8687	0.01502	0.1392	OpenSea	chr5:142802329
		Brain Imaging	Hippocampal Volume	Cross-Sectional	cg14438279	292	-0.7026	[-1.793-0.388]	0.20757	0.876	0.80706	0.05892	0.46785	OpenSea	chr5:142806343
		Brain Imaging	Hippocampal Volume	Cross-Sectional	cg08423118	292	0.2614	[-0.205-0.728]	0.27317	0.876	0.77492	0.07191	0.32112	OpenSea	chr5:142808610
		Brain Imaging	Hippocampal Volume	Cross-Sectional	cg23776787	292	2.2421	[-1.103-5.587]	0.18997	0.876	0.05181	0.01906	0.42487	OpenSea	chr5:142814315
		Brain Imaging	Hippocampal Volume	Cross-Sectional	cg03906910	292	0.2903	[-0.743-1.323]	0.58214	0.9241	0.22081	0.05239	0.37839	OpenSea	chr5:142814388
		Brain Imaging	Hippocampal Volume	Cross-Sectional	cg07589972	292	2.3436	[-1.841-6.528]	0.27332	0.876	0.90005	0.01417	0.2547	OpenSea	chr5:142815463
		Brain Imaging	Hippocampal Volume	Cross-Sectional	cg12466613	292	3.6649	[-1.133-8.463]	0.13553	0.876	0.91748	0.01192	0.24478	OpenSea	chr5:142815469
		Brain Imaging	Hippocampal Volume	Cross-Sectional	cg21979215	292	0.189	[-0.265-0.643]	0.41507	0.876	0.76917	0.06877	0.39558	OpenSea	chr5:142815807
		Brain Imaging	Hippocampal Volume	Cross-Sectional	cg11022710	292	1.5007	[-0.956-3.957]	0.23213	0.876	0.90751	0.01966	0.20763	OpenSea	chr5:142820479
		Brain Imaging	Hippocampal Volume	Longitudinal	cg23650353	126	0.0769	[-0.158-0.312]	0.52279	0.987	0.92108	0.028	0.43394	OpenSea	chr4:148993643
		Brain Imaging	Hippocampal Volume	Longitudinal	cg19491599	126	-0.145	[-0.333-0.043]	0.13442	0.8245	0.84529	0.0161	0.20857	OpenSea	chr4:149000607
		Brain Imaging	Hippocampal Volume	Longitudinal	cg10207656	126	0.0851	[-0.148-0.318]	0.47532	0.987	0.90855	0.01373	0.20071	OpenSea	chr4:149019526
		Brain Imaging	Hippocampal Volume	Longitudinal	cg09143276	126	0.009	[-0.111-0.129]	0.8835	0.987	0.80845	0.02074	0.13091	OpenSea	chr4:149066518
		Brain Imaging	Hippocampal Volume	Longitudinal	cg13000004	126	0.0162	[-0.232-0.265]	0.89832	0.987	0.86983	0.01161	0.09813	OpenSea	chr4:149074093
		Brain Imaging	Hippocampal Volume	Longitudinal	cg10590842	126	0.0072	[-0.234-0.249]	0.95336	0.987	0.9034	0.01143	0.10122	OpenSea	chr4:149083955
		Brain Imaging	Hippocampal Volume	Longitudinal	cg21701890	126	-0.003	[-0.132-0.126]	0.96361	0.987	0.61622	0.02898	0.23369	OpenSea	chr4:149094632
		Brain Imaging	Hippocampal Volume	Longitudinal	cg27234800	126	-0.0118	[-0.062-0.038]	0.64647	0.987	0.89127	0.0525	0.39493	OpenSea	chr4:149116611
		Brain Imaging	Hippocampal Volume	Longitudinal	cg25672354	126	0.0106	[-0.147-0.168]	0.89504	0.987	0.86697	0.01933	0.23574	OpenSea	chr4:149122383
		Brain Imaging	Hippocampal Volume	Longitudinal	cg10993059	126	0.1142	[-0.117-0.345]	0.33464	0.9329	0.892	0.014	0.24786	OpenSea	chr4:149123062
		Brain Imaging	Hippocampal Volume	Longitudinal	cg07335874	126	-0.1093	[-0.383-0.164]	0.43457	0.987	0.89734	0.01678	0.25463	OpenSea	chr4:149136507
		Brain Imaging	Hippocampal Volume	Longitudinal	cg08264907	126	-0.2114	[-0.571-0.148]	0.25152	0.9008	0.90365	0.00834	0.08404	OpenSea	chr4:149144045
		Brain Imaging	Hippocampal Volume	Longitudinal	cg07275757	126	-0.0288	[-0.283-0.226]	0.82501	0.987	0.89578	0.01331	0.13086	OpenSea	chr4:149189974
		Brain Imaging	Hippocampal Volume	Longitudinal	cg13157799	126	-0.0131	[-0.312-0.286]	0.93169	0.987	0.05908	0.01227	0.14832	OpenSea	chr4:149191991
		Brain Imaging	Hippocampal Volume	Longitudinal	cg00328411	126	-0.3758	[-0.726--0.026]	0.03773	0.5306	0.90656	0.00839	0.10838	OpenSea	chr4:149205617
		Brain Imaging	Hippocampal Volume	Longitudinal	cg02471166	126	0.0882	[-0.025-0.201]	0.12923	0.8245	0.62905	0.02431	0.28086	OpenSea	chr4:149244985
		Brain Imaging	Hippocampal Volume	Longitudinal	cg27225476	126	-0.2351	[-0.399--0.071]	0.00587	0.4826	0.85878	0.01502	0.11725	OpenSea	chr4:149275542
		Brain Imaging	Hippocampal Volume	Longitudinal	cg06240648	126	-0.0406	[-0.36-0.279]	0.80396	0.987	0.90857	0.00875	0.08216	OpenSea	chr4:149289762
		Brain Imaging	Hippocampal Volume	Longitudinal	cg04867484	126	-0.0097	[-0.148-0.129]	0.89149	0.987	0.06179	0.03171	0.6046	OpenSea	chr4:149297469
		Brain Imaging	Hippocampal Volume	Longitudinal	cg19496136	126	0.0457	[-0.019-0.111]	0.17076	0.853	0.74636	0.06158	0.84904	OpenSea	chr4:149336765
		Brain Imaging	Hippocampal Volume	Longitudinal	cg17253842	126	-0.0453	[-0.249-0.159]	0.66406	0.987	0.87057	0.02004	0.40157	OpenSea	chr4:149347991
		Brain Imaging	Hippocampal Volume	Longitudinal	cg19650300	126	-0.1107	[-0.328-0.106]	0.32006	0.9329	0.87161	0.0124	0.12937	OpenSea	chr4:149357960
		Brain Imaging	Hippocampal Volume	Longitudinal	cg09238384	126	0.0036	[-0.214-0.221]	0.97427	0.987	0.88033	0.01059	0.10479	OpenSea	chr4:149358199
		Brain Imaging	Hippocampal Volume	Longitudinal	cg07651033	126	0.0427	[-0.165-0.25]	0.68798	0.987	0.891	0.01412	0.08448	OpenSea	chr4:149359043
		Brain Imaging	Hippocampal Volume	Longitudinal	cg23329208	126	0.1162	[-0.149-0.381]	0.39209	0.9493	0.89218	0.01003	0.08891	N_Shelf	chr4:149360981
		Brain Imaging	Hippocampal Volume	Longitudinal	cg05437692	126	0.0433	[-0.049-0.136]	0.36096	0.9338	0.28837	0.04393	0.32226	N_Shore	chr4:149362435
		Brain Imaging	Hippocampal Volume	Longitudinal	cg27460943	126	0.0166	[-0.143-0.176]	0.83908	0.987	0.08292	0.02603	0.31306	N_Shore	chr4:149362809
		Brain Imaging	Hippocampal Volume	Longitudinal	cg01576854	126	0.2506	[-0.028-0.529]	0.08048	0.6731	0.07386	0.01207	0.20464	Island	chr4:149363450
		Brain Imaging	Hippocampal Volume	Longitudinal	cg13996731	126	0.1282	[-0.154-0.411]	0.37554	0.9338	0.05943	0.00984	0.12921	Island	chr4:149363522
		Brain Imaging	Hippocampal Volume	Longitudinal	cg20140452	126	0.0836	[-0.197-0.364]	0.56012	0.987	0.07045	0.00971	0.0619	Island	chr4:149363715
		Brain Imaging	Hippocampal Volume	Longitudinal	cg10621979	126	0.2613	[-0.057-0.58]	0.11073	0.8062	0.05355	0.018	0.29521	Island	chr4:149365824
		Brain Imaging	Hippocampal Volume	Longitudinal	cg11239219	126	0.2467	[0.001-0.492]	0.05159	0.5306	0.05479	0.02153	0.3658	Island	chr4:149365887
		Brain Imaging	Hippocampal Volume	Longitudinal	cg10002915	126	-0.009	[-0.044-0.026]	0.61225	0.987	0.54242	0.08455	0.73095	S_Shelf	chr4:149369175
		Brain Imaging	Hippocampal Volume	Longitudinal	cg15374100	126	-0.0176	[-0.258-0.222]	0.88601	0.987	0.86961	0.01354	0.2065	OpenSea	chr5:142651239
		Brain Imaging	Hippocampal Volume	Longitudinal	cg15740681	126	0.0677	[-0.26-0.396]	0.68684	0.987	0.89095	0.00925	0.09622	OpenSea	chr5:142653066
		Brain Imaging	Hippocampal Volume	Longitudinal	cg26081259	126	0.0993	[-0.254-0.452]	0.58228	0.987	0.92585	0.00714	0.05144	OpenSea	chr5:142659682
		Brain Imaging	Hippocampal Volume	Longitudinal	cg13514002	126	0.0751	[-0.178-0.328]	0.56214	0.987	0.9104	0.01216	0.16497	OpenSea	chr5:142677292
		Brain Imaging	Hippocampal Volume	Longitudinal	cg24801588	126	0.0006	[-0.264-0.265]	0.99651	0.9965	0.87613	0.01121	0.08119	OpenSea	chr5:142689858
		Brain Imaging	Hippocampal Volume	Longitudinal	cg00407401	126	0.0629	[-0.192-0.318]	0.6301	0.987	0.88336	0.0113	0.12225	OpenSea	chr5:142690959
		Brain Imaging	Hippocampal Volume	Longitudinal	cg19457823	126	-0.1166	[-0.284-0.05]	0.17413	0.853	0.85324	0.04572	0.44993	OpenSea	chr5:142692961
		Brain Imaging	Hippocampal Volume	Longitudinal	cg12741214	126	-0.0474	[-0.395-0.3]	0.78969	0.987	0.92153	0.00739	0.05446	OpenSea	chr5:142695619
		Brain Imaging	Hippocampal Volume	Longitudinal	cg04457787	126	-0.0275	[-0.355-0.301]	0.86994	0.987	0.91851	0.00864	0.10367	OpenSea	chr5:142695636
		Brain Imaging	Hippocampal Volume	Longitudinal	cg20728768	126	0.0724	[0.001-0.144]	0.05078	0.5306	0.28495	0.05593	0.42144	OpenSea	chr5:142696594
		Brain Imaging	Hippocampal Volume	Longitudinal	cg25708981	126	-0.0591	[-0.15-0.032]	0.20399	0.853	0.81142	0.04619	0.93615	OpenSea	chr5:142697868
		Brain Imaging	Hippocampal Volume	Longitudinal	cg19645279	126	0.0143	[-0.066-0.095]	0.72892	0.987	0.50627	0.03156	0.23017	OpenSea	chr5:142702733
		Brain Imaging	Hippocampal Volume	Longitudinal	cg19176661	126	-0.0639	[-0.303-0.175]	0.60166	0.987	0.90339	0.00908	0.09406	OpenSea	chr5:142718549
		Brain Imaging	Hippocampal Volume	Longitudinal	cg07715663	126	-0.1698	[-0.525-0.185]	0.35025	0.9338	0.89993	0.0077	0.06068	OpenSea	chr5:142721796
		Brain Imaging	Hippocampal Volume	Longitudinal	cg24052866	126	0.0488	[-0.025-0.122]	0.19497	0.853	0.69336	0.03805	0.44354	OpenSea	chr5:142727470
		Brain Imaging	Hippocampal Volume	Longitudinal	cg22233604	126	0.1206	[-0.028-0.269]	0.11393	0.8062	0.80239	0.02828	0.34628	OpenSea	chr5:142729377
		Brain Imaging	Hippocampal Volume	Longitudinal	cg03857453	126	0.0415	[-0.049-0.132]	0.37112	0.9338	0.71757	0.04588	0.42058	OpenSea	chr5:142729913
		Brain Imaging	Hippocampal Volume	Longitudinal	cg15115787	126	0.041	[-0.064-0.146]	0.4452	0.987	0.2334	0.0467	0.33835	OpenSea	chr5:142730701
		Brain Imaging	Hippocampal Volume	Longitudinal	cg12888360	126	0.0272	[-0.058-0.113]	0.5353	0.987	0.19071	0.0335	0.21819	OpenSea	chr5:142732502
		Brain Imaging	Hippocampal Volume	Longitudinal	cg18484679	126	0.063	[-0.146-0.272]	0.55622	0.987	0.85401	0.0155	0.16305	OpenSea	chr5:142740314
		Brain Imaging	Hippocampal Volume	Longitudinal	cg16586394	126	-0.0558	[-0.294-0.182]	0.64676	0.987	0.90913	0.01422	0.19939	OpenSea	chr5:142757011
		Brain Imaging	Hippocampal Volume	Longitudinal	cg25535999	126	-0.0295	[-0.329-0.27]	0.84706	0.987	0.89419	0.01191	0.0902	OpenSea	chr5:142757312
		Brain Imaging	Hippocampal Volume	Longitudinal	cg03746860	126	-0.0504	[-0.302-0.201]	0.6945	0.987	0.89502	0.01114	0.14119	OpenSea	chr5:142759375
		Brain Imaging	Hippocampal Volume	Longitudinal	cg20598211	126	-0.093	[-0.384-0.198]	0.53259	0.987	0.91627	0.01158	0.20941	OpenSea	chr5:142762454
		Brain Imaging	Hippocampal Volume	Longitudinal	cg05483455	126	0.1342	[-0.242-0.511]	0.48619	0.987	0.92855	0.00637	0.07369	OpenSea	chr5:142762613
		Brain Imaging	Hippocampal Volume	Longitudinal	cg16594263	126	0.0884	[-0.294-0.471]	0.65147	0.987	0.91923	0.01644	0.42455	OpenSea	chr5:142768048
		Brain Imaging	Hippocampal Volume	Longitudinal	cg16535116	126	0.1375	[0.006-0.269]	0.04338	0.5306	0.82395	0.0209	0.17773	OpenSea	chr5:142769612
		Brain Imaging	Hippocampal Volume	Longitudinal	cg05900547	126	-0.0296	[-0.182-0.122]	0.70294	0.987	0.82362	0.01868	0.15468	OpenSea	chr5:142769791
		Brain Imaging	Hippocampal Volume	Longitudinal	cg19432243	126	0.0061	[-0.048-0.06]	0.82351	0.987	0.75237	0.06043	0.89556	OpenSea	chr5:142770757
		Brain Imaging	Hippocampal Volume	Longitudinal	cg19820298	126	0.0022	[-0.049-0.053]	0.93259	0.987	0.78285	0.05639	0.30689	OpenSea	chr5:142770782
		Brain Imaging	Hippocampal Volume	Longitudinal	cg27107893	126	-0.0252	[-0.063-0.012]	0.19029	0.853	0.79309	0.09578	0.9445	OpenSea	chr5:142776274
		Brain Imaging	Hippocampal Volume	Longitudinal	cg17342132	126	-0.016	[-0.146-0.114]	0.80965	0.987	0.86999	0.03297	0.31216	N_Shore	chr5:142780254
		Brain Imaging	Hippocampal Volume	Longitudinal	cg07742588	126	-0.0067	[-0.078-0.064]	0.85486	0.987	0.78914	0.05595	0.91885	N_Shore	chr5:142780439
		Brain Imaging	Hippocampal Volume	Longitudinal	cg00294552	126	-0.0645	[-0.175-0.046]	0.25456	0.9008	0.84207	0.02221	0.20462	N_Shore	chr5:142780486
		Brain Imaging	Hippocampal Volume	Longitudinal	cg16219186	126	-0.1949	[-0.351--0.038]	0.01631	0.4826	0.88479	0.02148	0.22312	N_Shore	chr5:142780531
		Brain Imaging	Hippocampal Volume	Longitudinal	cg08845721	126	-0.1802	[-0.331--0.029]	0.02098	0.4826	0.90291	0.02257	0.35006	N_Shore	chr5:142780693
		Brain Imaging	Hippocampal Volume	Longitudinal	cg12969488	126	0.0459	[-0.04-0.132]	0.29788	0.9292	0.6959	0.03946	0.36342	N_Shore	chr5:142780984
		Brain Imaging	Hippocampal Volume	Longitudinal	cg07733851	126	0.002	[-0.053-0.057]	0.9432	0.987	0.31012	0.05444	0.48866	N_Shore	chr5:142781498
		Brain Imaging	Hippocampal Volume	Longitudinal	cg27122725	126	0.1429	[-0.124-0.41]	0.29688	0.9292	0.08247	0.03649	0.61758	N_Shore	chr5:142781723
		Brain Imaging	Hippocampal Volume	Longitudinal	cg06952416	126	0.0983	[-0.064-0.261]	0.23903	0.9008	0.10317	0.01595	0.14679	N_Shore	chr5:142781736
		Brain Imaging	Hippocampal Volume	Longitudinal	cg15910486	126	-0.0035	[-0.234-0.227]	0.97622	0.987	0.06987	0.01223	0.07877	Island	chr5:142783621
		Brain Imaging	Hippocampal Volume	Longitudinal	cg01967637	126	-0.1541	[-0.362-0.053]	0.14843	0.853	0.05849	0.01419	0.08687	Island	chr5:142784019
		Brain Imaging	Hippocampal Volume	Longitudinal	cg26464411	126	0.0063	[-0.204-0.217]	0.95308	0.987	0.0622	0.01192	0.08127	Island	chr5:142784222
		Brain Imaging	Hippocampal Volume	Longitudinal	cg06968181	126	-0.4761	[-0.992-0.039]	0.07299	0.6715	0.05291	0.02403	0.66787	Island	chr5:142784323
		Brain Imaging	Hippocampal Volume	Longitudinal	cg21702128	126	0.3157	[0.065-0.566]	0.01512	0.4826	0.08227	0.00965	0.07742	Island	chr5:142784721
		Brain Imaging	Hippocampal Volume	Longitudinal	cg18718518	126	0.0014	[-0.062-0.064]	0.96423	0.987	0.53255	0.05217	0.3892	S_Shore	chr5:142785455
		Brain Imaging	Hippocampal Volume	Longitudinal	cg13764763	126	-0.0426	[-0.107-0.021]	0.19386	0.853	0.85356	0.05856	0.5219	S_Shore	chr5:142785501
		Brain Imaging	Hippocampal Volume	Longitudinal	cg16224829	126	0.0121	[-0.071-0.096]	0.77624	0.987	0.79156	0.03531	0.28375	OpenSea	chr5:142792698
		Brain Imaging	Hippocampal Volume	Longitudinal	cg01751279	126	0.0155	[-0.079-0.11]	0.74939	0.987	0.83882	0.03986	0.35649	OpenSea	chr5:142793924
		Brain Imaging	Hippocampal Volume	Longitudinal	cg23430507	126	-0.0461	[-0.184-0.092]	0.51322	0.987	0.67871	0.03655	0.31636	OpenSea	chr5:142798375
		Brain Imaging	Hippocampal Volume	Longitudinal	cg17349736	126	0.0829	[-0.13-0.296]	0.44734	0.987	0.8687	0.01502	0.1392	OpenSea	chr5:142802329
		Brain Imaging	Hippocampal Volume	Longitudinal	cg14438279	126	0.0196	[-0.07-0.109]	0.66734	0.987	0.80706	0.05892	0.46785	OpenSea	chr5:142806343
		Brain Imaging	Hippocampal Volume	Longitudinal	cg08423118	126	-0.0206	[-0.059-0.017]	0.28947	0.9292	0.77492	0.07191	0.32112	OpenSea	chr5:142808610
		Brain Imaging	Hippocampal Volume	Longitudinal	cg23776787	126	-0.2841	[-0.567--0.001]	0.0519	0.5306	0.05181	0.01906	0.42487	OpenSea	chr5:142814315
		Brain Imaging	Hippocampal Volume	Longitudinal	cg03906910	126	-0.0625	[-0.166-0.041]	0.24082	0.9008	0.22081	0.05239	0.37839	OpenSea	chr5:142814388
		Brain Imaging	Hippocampal Volume	Longitudinal	cg07589972	126	-0.1963	[-0.568-0.176]	0.30301	0.9292	0.90005	0.01417	0.2547	OpenSea	chr5:142815463
		Brain Imaging	Hippocampal Volume	Longitudinal	cg12466613	126	-0.1217	[-0.559-0.316]	0.58648	0.987	0.91748	0.01192	0.24478	OpenSea	chr5:142815469
		Brain Imaging	Hippocampal Volume	Longitudinal	cg21979215	126	-0.013	[-0.051-0.025]	0.50379	0.987	0.76917	0.06877	0.39558	OpenSea	chr5:142815807
		Brain Imaging	Hippocampal Volume	Longitudinal	cg11022710	126	0.109	[-0.109-0.327]	0.32957	0.9329	0.90751	0.01966	0.20763	OpenSea	chr5:142820479
		Brain Imaging	Ventricular Volume	Cross-Sectional	cg23650353	292	-67.7497	[-207.393-71.893]	0.34247	0.9389	0.92108	0.028	0.43394	OpenSea	chr4:148993643
		Brain Imaging	Ventricular Volume	Cross-Sectional	cg19491599	292	-48.6712	[-164.089-66.747]	0.40922	0.9389	0.84529	0.0161	0.20857	OpenSea	chr4:149000607
		Brain Imaging	Ventricular Volume	Cross-Sectional	cg10207656	292	-96.1609	[-242.814-50.492]	0.1998	0.9389	0.90855	0.01373	0.20071	OpenSea	chr4:149019526
		Brain Imaging	Ventricular Volume	Cross-Sectional	cg09143276	292	45.0785	[-33.473-123.63]	0.26165	0.9389	0.80845	0.02074	0.13091	OpenSea	chr4:149066518
		Brain Imaging	Ventricular Volume	Cross-Sectional	cg13000004	292	-8.7125	[-155.262-137.837]	0.90732	0.9486	0.86983	0.01161	0.09813	OpenSea	chr4:149074093
		Brain Imaging	Ventricular Volume	Cross-Sectional	cg10590842	292	-43.2467	[-205.649-119.155]	0.60213	0.9389	0.9034	0.01143	0.10122	OpenSea	chr4:149083955
		Brain Imaging	Ventricular Volume	Cross-Sectional	cg21701890	292	-30.4843	[-105.147-44.178]	0.42425	0.9389	0.61622	0.02898	0.23369	OpenSea	chr4:149094632
		Brain Imaging	Ventricular Volume	Cross-Sectional	cg27234800	292	12.8803	[-14.689-40.45]	0.36062	0.9389	0.89127	0.0525	0.39493	OpenSea	chr4:149116611
		Brain Imaging	Ventricular Volume	Cross-Sectional	cg25672354	292	-32.1679	[-129.98-65.644]	0.51972	0.9389	0.86697	0.01933	0.23574	OpenSea	chr4:149122383
		Brain Imaging	Ventricular Volume	Cross-Sectional	cg10993059	292	76.8034	[-68.34-221.947]	0.30057	0.9389	0.892	0.014	0.24786	OpenSea	chr4:149123062
		Brain Imaging	Ventricular Volume	Cross-Sectional	cg07335874	292	-13.1217	[-165.713-139.469]	0.86628	0.9484	0.89734	0.01678	0.25463	OpenSea	chr4:149136507
		Brain Imaging	Ventricular Volume	Cross-Sectional	cg08264907	292	-26.6545	[-232.123-178.814]	0.79948	0.9484	0.90365	0.00834	0.08404	OpenSea	chr4:149144045
		Brain Imaging	Ventricular Volume	Cross-Sectional	cg07275757	292	28.2876	[-125.708-182.283]	0.7191	0.9484	0.89578	0.01331	0.13086	OpenSea	chr4:149189974
		Brain Imaging	Ventricular Volume	Cross-Sectional	cg13157799	292	16.1326	[-143.344-175.609]	0.84298	0.9484	0.05908	0.01227	0.14832	OpenSea	chr4:149191991
		Brain Imaging	Ventricular Volume	Cross-Sectional	cg00328411	292	43.5332	[-164.793-251.859]	0.68244	0.9484	0.90656	0.00839	0.10838	OpenSea	chr4:149205617
		Brain Imaging	Ventricular Volume	Cross-Sectional	cg02471166	292	40.7994	[-28.223-109.822]	0.24763	0.9389	0.62905	0.02431	0.28086	OpenSea	chr4:149244985
		Brain Imaging	Ventricular Volume	Cross-Sectional	cg27225476	292	-41.9701	[-142.179-58.238]	0.41241	0.9389	0.85878	0.01502	0.11725	OpenSea	chr4:149275542
		Brain Imaging	Ventricular Volume	Cross-Sectional	cg06240648	292	-84.6816	[-277.539-108.176]	0.39019	0.9389	0.90857	0.00875	0.08216	OpenSea	chr4:149289762
		Brain Imaging	Ventricular Volume	Cross-Sectional	cg04867484	292	24.356	[-67.028-115.74]	0.60182	0.9389	0.06179	0.03171	0.6046	OpenSea	chr4:149297469
		Brain Imaging	Ventricular Volume	Cross-Sectional	cg19496136	292	13.0035	[-30.406-56.413]	0.5576	0.9389	0.74636	0.06158	0.84904	OpenSea	chr4:149336765
		Brain Imaging	Ventricular Volume	Cross-Sectional	cg17253842	292	-70.8459	[-182.432-40.74]	0.2144	0.9389	0.87057	0.02004	0.40157	OpenSea	chr4:149347991
		Brain Imaging	Ventricular Volume	Cross-Sectional	cg19650300	292	-11.5079	[-147.817-124.801]	0.86869	0.9484	0.87161	0.0124	0.12937	OpenSea	chr4:149357960
		Brain Imaging	Ventricular Volume	Cross-Sectional	cg09238384	292	-57.1521	[-202.527-88.223]	0.44163	0.9389	0.88033	0.01059	0.10479	OpenSea	chr4:149358199
		Brain Imaging	Ventricular Volume	Cross-Sectional	cg07651033	292	-28.0999	[-139.456-83.256]	0.62128	0.9484	0.891	0.01412	0.08448	OpenSea	chr4:149359043
		Brain Imaging	Ventricular Volume	Cross-Sectional	cg23329208	292	-110.112	[-266.986-46.761]	0.17001	0.9389	0.89218	0.01003	0.08891	N_Shelf	chr4:149360981
		Brain Imaging	Ventricular Volume	Cross-Sectional	cg05437692	292	-21.5706	[-78.504-35.363]	0.45836	0.9389	0.28837	0.04393	0.32226	N_Shore	chr4:149362435
		Brain Imaging	Ventricular Volume	Cross-Sectional	cg27460943	292	-28.6421	[-121.243-63.959]	0.54485	0.9389	0.08292	0.02603	0.31306	N_Shore	chr4:149362809
		Brain Imaging	Ventricular Volume	Cross-Sectional	cg01576854	292	-111.247	[-275.383-52.888]	0.18513	0.9389	0.07386	0.01207	0.20464	Island	chr4:149363450
		Brain Imaging	Ventricular Volume	Cross-Sectional	cg13996731	292	-131.106	[-308.259-46.046]	0.14804	0.9389	0.05943	0.00984	0.12921	Island	chr4:149363522
		Brain Imaging	Ventricular Volume	Cross-Sectional	cg20140452	292	21.9808	[-146.921-190.883]	0.79886	0.9484	0.07045	0.00971	0.0619	Island	chr4:149363715
		Brain Imaging	Ventricular Volume	Cross-Sectional	cg10621979	292	66.0272	[-101.363-233.417]	0.44011	0.9389	0.05355	0.018	0.29521	Island	chr4:149365824
		Brain Imaging	Ventricular Volume	Cross-Sectional	cg11239219	292	34.6428	[-120.932-190.218]	0.66285	0.9484	0.05479	0.02153	0.3658	Island	chr4:149365887
		Brain Imaging	Ventricular Volume	Cross-Sectional	cg10002915	292	-6.7824	[-26.982-13.418]	0.51102	0.9389	0.54242	0.08455	0.73095	S_Shelf	chr4:149369175
		Brain Imaging	Ventricular Volume	Cross-Sectional	cg15374100	292	15.0098	[-124.651-154.671]	0.83332	0.9484	0.86961	0.01354	0.2065	OpenSea	chr5:142651239
		Brain Imaging	Ventricular Volume	Cross-Sectional	cg15740681	292	-69.3291	[-257.491-118.833]	0.4708	0.9389	0.89095	0.00925	0.09622	OpenSea	chr5:142653066
		Brain Imaging	Ventricular Volume	Cross-Sectional	cg26081259	292	-115.419	[-329.628-98.79]	0.29185	0.9389	0.92585	0.00714	0.05144	OpenSea	chr5:142659682
		Brain Imaging	Ventricular Volume	Cross-Sectional	cg13514002	292	-57.3648	[-209.759-95.029]	0.46127	0.9389	0.9104	0.01216	0.16497	OpenSea	chr5:142677292
		Brain Imaging	Ventricular Volume	Cross-Sectional	cg24801588	292	35.3135	[-111.999-182.626]	0.63883	0.9484	0.87613	0.01121	0.08119	OpenSea	chr5:142689858
		Brain Imaging	Ventricular Volume	Cross-Sectional	cg00407401	292	147.782	[-9.826-305.39]	0.06716	0.9389	0.88336	0.0113	0.12225	OpenSea	chr5:142690959
		Brain Imaging	Ventricular Volume	Cross-Sectional	cg19457823	292	-1.3827	[-36.723-33.957]	0.93893	0.9679	0.85324	0.04572	0.44993	OpenSea	chr5:142692961
		Brain Imaging	Ventricular Volume	Cross-Sectional	cg12741214	292	19.6894	[-195.171-234.55]	0.85759	0.9484	0.92153	0.00739	0.05446	OpenSea	chr5:142695619
		Brain Imaging	Ventricular Volume	Cross-Sectional	cg04457787	292	-112.738	[-313.746-88.27]	0.2726	0.9389	0.91851	0.00864	0.10367	OpenSea	chr5:142695636
		Brain Imaging	Ventricular Volume	Cross-Sectional	cg20728768	292	20.5875	[-27.245-68.42]	0.39963	0.9389	0.28495	0.05593	0.42144	OpenSea	chr5:142696594
		Brain Imaging	Ventricular Volume	Cross-Sectional	cg25708981	292	-3.9754	[-50.428-42.477]	0.86691	0.9484	0.81142	0.04619	0.93615	OpenSea	chr5:142697868
		Brain Imaging	Ventricular Volume	Cross-Sectional	cg19645279	292	18.2277	[-34.434-70.89]	0.49808	0.9389	0.50627	0.03156	0.23017	OpenSea	chr5:142702733
		Brain Imaging	Ventricular Volume	Cross-Sectional	cg19176661	292	106.704	[-54.229-267.637]	0.19484	0.9389	0.90339	0.00908	0.09406	OpenSea	chr5:142718549
		Brain Imaging	Ventricular Volume	Cross-Sectional	cg07715663	292	74.9901	[-135.3-285.281]	0.48518	0.9389	0.89993	0.0077	0.06068	OpenSea	chr5:142721796
		Brain Imaging	Ventricular Volume	Cross-Sectional	cg24052866	292	7.8415	[-39.269-54.952]	0.74449	0.9484	0.69336	0.03805	0.44354	OpenSea	chr5:142727470
		Brain Imaging	Ventricular Volume	Cross-Sectional	cg22233604	292	56.8827	[-26.833-140.599]	0.18403	0.9389	0.80239	0.02828	0.34628	OpenSea	chr5:142729377
		Brain Imaging	Ventricular Volume	Cross-Sectional	cg03857453	292	-3.2509	[-52.339-45.837]	0.89682	0.9484	0.71757	0.04588	0.42058	OpenSea	chr5:142729913
		Brain Imaging	Ventricular Volume	Cross-Sectional	cg15115787	292	-1.6346	[-61.57-58.3]	0.95741	0.9679	0.2334	0.0467	0.33835	OpenSea	chr5:142730701
		Brain Imaging	Ventricular Volume	Cross-Sectional	cg12888360	292	15.1669	[-36.362-66.695]	0.56447	0.9389	0.19071	0.0335	0.21819	OpenSea	chr5:142732502
		Brain Imaging	Ventricular Volume	Cross-Sectional	cg18484679	292	127.466	[15.907-239.025]	0.02592	0.9389	0.85401	0.0155	0.16305	OpenSea	chr5:142740314
		Brain Imaging	Ventricular Volume	Cross-Sectional	cg16586394	292	42.5982	[-117.331-202.527]	0.60205	0.9389	0.90913	0.01422	0.19939	OpenSea	chr5:142757011
		Brain Imaging	Ventricular Volume	Cross-Sectional	cg25535999	292	28.9537	[-125.189-183.097]	0.71304	0.9484	0.89419	0.01191	0.0902	OpenSea	chr5:142757312
		Brain Imaging	Ventricular Volume	Cross-Sectional	cg03746860	292	34.9051	[-116.037-185.847]	0.65073	0.9484	0.89502	0.01114	0.14119	OpenSea	chr5:142759375
		Brain Imaging	Ventricular Volume	Cross-Sectional	cg20598211	292	61.0135	[-115.156-237.183]	0.49782	0.9389	0.91627	0.01158	0.20941	OpenSea	chr5:142762454
		Brain Imaging	Ventricular Volume	Cross-Sectional	cg05483455	292	194.911	[-34.592-424.413]	0.09713	0.9389	0.92855	0.00637	0.07369	OpenSea	chr5:142762613
		Brain Imaging	Ventricular Volume	Cross-Sectional	cg16594263	292	34.3701	[-198.109-266.85]	0.77221	0.9484	0.91923	0.01644	0.42455	OpenSea	chr5:142768048
		Brain Imaging	Ventricular Volume	Cross-Sectional	cg16535116	292	92.1123	[7.127-177.098]	0.03453	0.9389	0.82395	0.0209	0.17773	OpenSea	chr5:142769612
		Brain Imaging	Ventricular Volume	Cross-Sectional	cg05900547	292	14.6244	[-79.444-108.692]	0.76081	0.9484	0.82362	0.01868	0.15468	OpenSea	chr5:142769791
		Brain Imaging	Ventricular Volume	Cross-Sectional	cg19432243	292	9.5691	[-21.271-40.409]	0.54359	0.9389	0.75237	0.06043	0.89556	OpenSea	chr5:142770757
		Brain Imaging	Ventricular Volume	Cross-Sectional	cg19820298	292	10.4879	[-19.445-40.421]	0.49282	0.9389	0.78285	0.05639	0.30689	OpenSea	chr5:142770782
		Brain Imaging	Ventricular Volume	Cross-Sectional	cg27107893	292	13.917	[-1.973-29.807]	0.08716	0.9389	0.79309	0.09578	0.9445	OpenSea	chr5:142776274
		Brain Imaging	Ventricular Volume	Cross-Sectional	cg17342132	292	24.0024	[-57.121-105.126]	0.56245	0.9389	0.86999	0.03297	0.31216	N_Shore	chr5:142780254
		Brain Imaging	Ventricular Volume	Cross-Sectional	cg07742588	292	-20.8775	[-64.939-23.184]	0.35385	0.9389	0.78914	0.05595	0.91885	N_Shore	chr5:142780439
		Brain Imaging	Ventricular Volume	Cross-Sectional	cg00294552	292	55.6884	[-18.212-129.589]	0.14082	0.9389	0.84207	0.02221	0.20462	N_Shore	chr5:142780486
		Brain Imaging	Ventricular Volume	Cross-Sectional	cg16219186	292	66.9811	[-27.187-161.149]	0.16439	0.9389	0.88479	0.02148	0.22312	N_Shore	chr5:142780531
		Brain Imaging	Ventricular Volume	Cross-Sectional	cg08845721	292	49.156	[-45.867-144.179]	0.31151	0.9389	0.90291	0.02257	0.35006	N_Shore	chr5:142780693
		Brain Imaging	Ventricular Volume	Cross-Sectional	cg12969488	292	3.967	[-45.266-53.2]	0.87463	0.9484	0.6959	0.03946	0.36342	N_Shore	chr5:142780984
		Brain Imaging	Ventricular Volume	Cross-Sectional	cg07733851	292	2.9457	[-25.784-31.675]	0.84087	0.9484	0.31012	0.05444	0.48866	N_Shore	chr5:142781498
		Brain Imaging	Ventricular Volume	Cross-Sectional	cg27122725	292	60.7797	[-91.09-212.65]	0.43347	0.9389	0.08247	0.03649	0.61758	N_Shore	chr5:142781723
		Brain Imaging	Ventricular Volume	Cross-Sectional	cg06952416	292	72.8815	[-32.863-178.626]	0.17784	0.9389	0.10317	0.01595	0.14679	N_Shore	chr5:142781736
		Brain Imaging	Ventricular Volume	Cross-Sectional	cg15910486	292	29.3895	[-110.145-168.924]	0.68005	0.9484	0.06987	0.01223	0.07877	Island	chr5:142783621
		Brain Imaging	Ventricular Volume	Cross-Sectional	cg01967637	292	11.8253	[-104.582-128.233]	0.84232	0.9484	0.05849	0.01419	0.08687	Island	chr5:142784019
		Brain Imaging	Ventricular Volume	Cross-Sectional	cg26464411	292	66.6821	[-58.492-191.856]	0.29734	0.9389	0.0622	0.01192	0.08127	Island	chr5:142784222
		Brain Imaging	Ventricular Volume	Cross-Sectional	cg06968181	292	-88.4182	[-412.795-235.958]	0.59359	0.9389	0.05291	0.02403	0.66787	Island	chr5:142784323
		Brain Imaging	Ventricular Volume	Cross-Sectional	cg21702128	292	12.5707	[-153.384-178.526]	0.88208	0.9484	0.08227	0.00965	0.07742	Island	chr5:142784721
		Brain Imaging	Ventricular Volume	Cross-Sectional	cg18718518	292	-6.0284	[-39.969-27.912]	0.72801	0.9484	0.53255	0.05217	0.3892	S_Shore	chr5:142785455
		Brain Imaging	Ventricular Volume	Cross-Sectional	cg13764763	292	-17.523	[-46.517-11.471]	0.2372	0.9389	0.85356	0.05856	0.5219	S_Shore	chr5:142785501
		Brain Imaging	Ventricular Volume	Cross-Sectional	cg16224829	292	40.7689	[-9.343-90.881]	0.11195	0.9389	0.79156	0.03531	0.28375	OpenSea	chr5:142792698
		Brain Imaging	Ventricular Volume	Cross-Sectional	cg01751279	292	5.8977	[-55.78-67.575]	0.85147	0.9484	0.83882	0.03986	0.35649	OpenSea	chr5:142793924
		Brain Imaging	Ventricular Volume	Cross-Sectional	cg23430507	292	-7.6572	[-81.326-66.011]	0.83872	0.9484	0.67871	0.03655	0.31636	OpenSea	chr5:142798375
		Brain Imaging	Ventricular Volume	Cross-Sectional	cg17349736	292	76.0818	[-41.679-193.843]	0.20647	0.9389	0.8687	0.01502	0.1392	OpenSea	chr5:142802329
		Brain Imaging	Ventricular Volume	Cross-Sectional	cg14438279	292	1.8632	[-54.515-58.241]	0.9484	0.9679	0.80706	0.05892	0.46785	OpenSea	chr5:142806343
		Brain Imaging	Ventricular Volume	Cross-Sectional	cg08423118	292	10.0404	[-14.051-34.131]	0.4147	0.9389	0.77492	0.07191	0.32112	OpenSea	chr5:142808610
		Brain Imaging	Ventricular Volume	Cross-Sectional	cg23776787	292	108.176	[-64.375-280.727]	0.2202	0.9389	0.05181	0.01906	0.42487	OpenSea	chr5:142814315
		Brain Imaging	Ventricular Volume	Cross-Sectional	cg03906910	292	30.6957	[-22.483-83.874]	0.25888	0.9389	0.22081	0.05239	0.37839	OpenSea	chr5:142814388
		Brain Imaging	Ventricular Volume	Cross-Sectional	cg07589972	292	-194.331	[-409.403-20.742]	0.07766	0.9389	0.90005	0.01417	0.2547	OpenSea	chr5:142815463
		Brain Imaging	Ventricular Volume	Cross-Sectional	cg12466613	292	16.898	[-231.548-265.345]	0.89405	0.9484	0.91748	0.01192	0.24478	OpenSea	chr5:142815469
		Brain Imaging	Ventricular Volume	Cross-Sectional	cg21979215	292	14.6992	[-8.666-38.064]	0.2186	0.9389	0.76917	0.06877	0.39558	OpenSea	chr5:142815807
		Brain Imaging	Ventricular Volume	Cross-Sectional	cg11022710	292	-2.5793	[-129.581-124.423]	0.96828	0.9683	0.90751	0.01966	0.20763	OpenSea	chr5:142820479
		Brain Imaging	Ventricular Volume	Longitudinal	cg23650353	126	-0.8237	[-13.462-11.814]	0.89858	0.9502	0.92108	0.028	0.43394	OpenSea	chr4:148993643
		Brain Imaging	Ventricular Volume	Longitudinal	cg19491599	126	3.0959	[-7.04-13.232]	0.55064	0.9502	0.84529	0.0161	0.20857	OpenSea	chr4:149000607
		Brain Imaging	Ventricular Volume	Longitudinal	cg10207656	126	-7.0195	[-19.461-5.421]	0.27119	0.8525	0.90855	0.01373	0.20071	OpenSea	chr4:149019526
		Brain Imaging	Ventricular Volume	Longitudinal	cg09143276	126	-0.8346	[-7.153-5.484]	0.7962	0.9502	0.80845	0.02074	0.13091	OpenSea	chr4:149066518
		Brain Imaging	Ventricular Volume	Longitudinal	cg13000004	126	-7.1677	[-20.373-6.037]	0.28971	0.8525	0.86983	0.01161	0.09813	OpenSea	chr4:149074093
		Brain Imaging	Ventricular Volume	Longitudinal	cg10590842	126	3.9285	[-8.856-16.713]	0.54821	0.9502	0.9034	0.01143	0.10122	OpenSea	chr4:149083955
		Brain Imaging	Ventricular Volume	Longitudinal	cg21701890	126	0.5382	[-6.331-7.407]	0.87823	0.9502	0.61622	0.02898	0.23369	OpenSea	chr4:149094632
		Brain Imaging	Ventricular Volume	Longitudinal	cg27234800	126	-3.3899	[-5.982--0.798]	0.01172	0.468	0.89127	0.0525	0.39493	OpenSea	chr4:149116611
		Brain Imaging	Ventricular Volume	Longitudinal	cg25672354	126	-4.6425	[-12.888-3.603]	0.27217	0.8525	0.86697	0.01933	0.23574	OpenSea	chr4:149122383
		Brain Imaging	Ventricular Volume	Longitudinal	cg10993059	126	-1.4051	[-13.718-10.908]	0.82343	0.9502	0.892	0.014	0.24786	OpenSea	chr4:149123062
		Brain Imaging	Ventricular Volume	Longitudinal	cg07335874	126	-2.9549	[-17.525-11.615]	0.69177	0.9502	0.89734	0.01678	0.25463	OpenSea	chr4:149136507
		Brain Imaging	Ventricular Volume	Longitudinal	cg08264907	126	1.3832	[-17.889-20.655]	0.88839	0.9502	0.90365	0.00834	0.08404	OpenSea	chr4:149144045
		Brain Imaging	Ventricular Volume	Longitudinal	cg07275757	126	-2.3129	[-15.851-11.225]	0.73837	0.9502	0.89578	0.01331	0.13086	OpenSea	chr4:149189974
		Brain Imaging	Ventricular Volume	Longitudinal	cg13157799	126	8.1002	[-7.619-23.819]	0.3147	0.8569	0.05908	0.01227	0.14832	OpenSea	chr4:149191991
		Brain Imaging	Ventricular Volume	Longitudinal	cg00328411	126	11.369	[-7.494-30.232]	0.24001	0.8525	0.90656	0.00839	0.10838	OpenSea	chr4:149205617
		Brain Imaging	Ventricular Volume	Longitudinal	cg02471166	126	3.5075	[-2.529-9.544]	0.25722	0.8525	0.62905	0.02431	0.28086	OpenSea	chr4:149244985
		Brain Imaging	Ventricular Volume	Longitudinal	cg27225476	126	5.2088	[-3.814-14.232]	0.26031	0.8525	0.85878	0.01502	0.11725	OpenSea	chr4:149275542
		Brain Imaging	Ventricular Volume	Longitudinal	cg06240648	126	0.0815	[-16.849-17.012]	0.99249	0.9925	0.90857	0.00875	0.08216	OpenSea	chr4:149289762
		Brain Imaging	Ventricular Volume	Longitudinal	cg04867484	126	0.6672	[-6.704-8.038]	0.8595	0.9502	0.06179	0.03171	0.6046	OpenSea	chr4:149297469
		Brain Imaging	Ventricular Volume	Longitudinal	cg19496136	126	-1.4205	[-4.904-2.063]	0.42585	0.9111	0.74636	0.06158	0.84904	OpenSea	chr4:149336765
		Brain Imaging	Ventricular Volume	Longitudinal	cg17253842	126	5.1638	[-5.543-15.87]	0.34658	0.8569	0.87057	0.02004	0.40157	OpenSea	chr4:149347991
		Brain Imaging	Ventricular Volume	Longitudinal	cg19650300	126	4.0839	[-7.493-15.661]	0.49076	0.9502	0.87161	0.0124	0.12937	OpenSea	chr4:149357960
		Brain Imaging	Ventricular Volume	Longitudinal	cg09238384	126	-1.4049	[-12.909-10.099]	0.81127	0.9502	0.88033	0.01059	0.10479	OpenSea	chr4:149358199
		Brain Imaging	Ventricular Volume	Longitudinal	cg07651033	126	-5.1862	[-16.191-5.818]	0.35767	0.8569	0.891	0.01412	0.08448	OpenSea	chr4:149359043
		Brain Imaging	Ventricular Volume	Longitudinal	cg23329208	126	4.121	[-9.893-18.135]	0.56555	0.9502	0.89218	0.01003	0.08891	N_Shelf	chr4:149360981
		Brain Imaging	Ventricular Volume	Longitudinal	cg05437692	126	-3.0991	[-8.005-1.807]	0.21832	0.8525	0.28837	0.04393	0.32226	N_Shore	chr4:149362435
		Brain Imaging	Ventricular Volume	Longitudinal	cg27460943	126	-0.0416	[-8.52-8.437]	0.99234	0.9925	0.08292	0.02603	0.31306	N_Shore	chr4:149362809
		Brain Imaging	Ventricular Volume	Longitudinal	cg01576854	126	2.1265	[-12.716-16.969]	0.77939	0.9502	0.07386	0.01207	0.20464	Island	chr4:149363450
		Brain Imaging	Ventricular Volume	Longitudinal	cg13996731	126	-8.7228	[-23.833-6.387]	0.2603	0.8525	0.05943	0.00984	0.12921	Island	chr4:149363522
		Brain Imaging	Ventricular Volume	Longitudinal	cg20140452	126	-1.574	[-16.544-13.396]	0.8371	0.9502	0.07045	0.00971	0.0619	Island	chr4:149363715
		Brain Imaging	Ventricular Volume	Longitudinal	cg10621979	126	-3.6003	[-20.653-13.453]	0.67983	0.9502	0.05355	0.018	0.29521	Island	chr4:149365824
		Brain Imaging	Ventricular Volume	Longitudinal	cg11239219	126	-4.2418	[-17.427-8.944]	0.52965	0.9502	0.05479	0.02153	0.3658	Island	chr4:149365887
		Brain Imaging	Ventricular Volume	Longitudinal	cg10002915	126	-0.3798	[-2.231-1.472]	0.68838	0.9502	0.54242	0.08455	0.73095	S_Shelf	chr4:149369175
		Brain Imaging	Ventricular Volume	Longitudinal	cg15374100	126	1.9498	[-10.839-14.739]	0.76564	0.9502	0.86961	0.01354	0.2065	OpenSea	chr5:142651239
		Brain Imaging	Ventricular Volume	Longitudinal	cg15740681	126	-2.0029	[-19.453-15.447]	0.82242	0.9502	0.89095	0.00925	0.09622	OpenSea	chr5:142653066
		Brain Imaging	Ventricular Volume	Longitudinal	cg26081259	126	15.5157	[-3.074-34.106]	0.10472	0.8525	0.92585	0.00714	0.05144	OpenSea	chr5:142659682
		Brain Imaging	Ventricular Volume	Longitudinal	cg13514002	126	-4.5729	[-18.05-8.904]	0.50741	0.9502	0.9104	0.01216	0.16497	OpenSea	chr5:142677292
		Brain Imaging	Ventricular Volume	Longitudinal	cg24801588	126	0.7991	[-13.356-14.955]	0.9121	0.9536	0.87613	0.01121	0.08119	OpenSea	chr5:142689858
		Brain Imaging	Ventricular Volume	Longitudinal	cg00407401	126	7.4013	[-6.343-21.145]	0.29352	0.8525	0.88336	0.0113	0.12225	OpenSea	chr5:142690959
		Brain Imaging	Ventricular Volume	Longitudinal	cg19457823	126	8.4665	[-0.38-17.313]	0.06333	0.8525	0.85324	0.04572	0.44993	OpenSea	chr5:142692961
		Brain Imaging	Ventricular Volume	Longitudinal	cg12741214	126	3.2837	[-15.176-21.744]	0.72803	0.9502	0.92153	0.00739	0.05446	OpenSea	chr5:142695619
		Brain Imaging	Ventricular Volume	Longitudinal	cg04457787	126	15.8885	[-0.95-32.727]	0.06708	0.8525	0.91851	0.00864	0.10367	OpenSea	chr5:142695636
		Brain Imaging	Ventricular Volume	Longitudinal	cg20728768	126	-2.2469	[-6.115-1.621]	0.25733	0.8525	0.28495	0.05593	0.42144	OpenSea	chr5:142696594
		Brain Imaging	Ventricular Volume	Longitudinal	cg25708981	126	4.3872	[-0.129-8.903]	0.05949	0.8525	0.81142	0.04619	0.93615	OpenSea	chr5:142697868
		Brain Imaging	Ventricular Volume	Longitudinal	cg19645279	126	0.9049	[-3.381-5.191]	0.67983	0.9502	0.50627	0.03156	0.23017	OpenSea	chr5:142702733
		Brain Imaging	Ventricular Volume	Longitudinal	cg19176661	126	5.3132	[-7.447-18.073]	0.41619	0.9111	0.90339	0.00908	0.09406	OpenSea	chr5:142718549
		Brain Imaging	Ventricular Volume	Longitudinal	cg07715663	126	3.7174	[-15.261-22.696]	0.70179	0.9502	0.89993	0.0077	0.06068	OpenSea	chr5:142721796
		Brain Imaging	Ventricular Volume	Longitudinal	cg24052866	126	-1.831	[-5.732-2.07]	0.3596	0.8569	0.69336	0.03805	0.44354	OpenSea	chr5:142727470
		Brain Imaging	Ventricular Volume	Longitudinal	cg22233604	126	-5.1846	[-13.023-2.654]	0.19756	0.8525	0.80239	0.02828	0.34628	OpenSea	chr5:142729377
		Brain Imaging	Ventricular Volume	Longitudinal	cg03857453	126	-3.2383	[-8.068-1.591]	0.1915	0.8525	0.71757	0.04588	0.42058	OpenSea	chr5:142729913
		Brain Imaging	Ventricular Volume	Longitudinal	cg15115787	126	-3.3569	[-8.899-2.185]	0.23769	0.8525	0.2334	0.0467	0.33835	OpenSea	chr5:142730701
		Brain Imaging	Ventricular Volume	Longitudinal	cg12888360	126	-2.5235	[-7.076-2.029]	0.27961	0.8525	0.19071	0.0335	0.21819	OpenSea	chr5:142732502
		Brain Imaging	Ventricular Volume	Longitudinal	cg18484679	126	-3.1999	[-14.478-8.078]	0.57928	0.9502	0.85401	0.0155	0.16305	OpenSea	chr5:142740314
		Brain Imaging	Ventricular Volume	Longitudinal	cg16586394	126	10.4277	[-1.992-22.847]	0.10268	0.8525	0.90913	0.01422	0.19939	OpenSea	chr5:142757011
		Brain Imaging	Ventricular Volume	Longitudinal	cg25535999	126	10.7327	[-5.026-26.491]	0.18467	0.8525	0.89419	0.01191	0.0902	OpenSea	chr5:142757312
		Brain Imaging	Ventricular Volume	Longitudinal	cg03746860	126	-6.4449	[-19.683-6.793]	0.34207	0.8569	0.89502	0.01114	0.14119	OpenSea	chr5:142759375
		Brain Imaging	Ventricular Volume	Longitudinal	cg20598211	126	9.6627	[-5.84-25.165]	0.22444	0.8525	0.91627	0.01158	0.20941	OpenSea	chr5:142762454
		Brain Imaging	Ventricular Volume	Longitudinal	cg05483455	126	9.4553	[-10.844-29.754]	0.36325	0.8569	0.92855	0.00637	0.07369	OpenSea	chr5:142762613
		Brain Imaging	Ventricular Volume	Longitudinal	cg16594263	126	1.7564	[-18.666-22.179]	0.86645	0.9502	0.91923	0.01644	0.42455	OpenSea	chr5:142768048
		Brain Imaging	Ventricular Volume	Longitudinal	cg16535116	126	0.1339	[-7.021-7.289]	0.9708	0.9924	0.82395	0.0209	0.17773	OpenSea	chr5:142769612
		Brain Imaging	Ventricular Volume	Longitudinal	cg05900547	126	-3.0751	[-10.966-4.816]	0.44664	0.9141	0.82362	0.01868	0.15468	OpenSea	chr5:142769791
		Brain Imaging	Ventricular Volume	Longitudinal	cg19432243	126	-0.6618	[-3.521-2.197]	0.65096	0.9502	0.75237	0.06043	0.89556	OpenSea	chr5:142770757
		Brain Imaging	Ventricular Volume	Longitudinal	cg19820298	126	-0.2977	[-2.973-2.377]	0.82773	0.9502	0.78285	0.05639	0.30689	OpenSea	chr5:142770782
		Brain Imaging	Ventricular Volume	Longitudinal	cg27107893	126	0.1862	[-1.823-2.196]	0.85626	0.9502	0.79309	0.09578	0.9445	OpenSea	chr5:142776274
		Brain Imaging	Ventricular Volume	Longitudinal	cg17342132	126	2.9016	[-3.98-9.783]	0.41032	0.9111	0.86999	0.03297	0.31216	N_Shore	chr5:142780254
		Brain Imaging	Ventricular Volume	Longitudinal	cg07742588	126	2.4734	[-1.286-6.232]	0.19987	0.8525	0.78914	0.05595	0.91885	N_Shore	chr5:142780439
		Brain Imaging	Ventricular Volume	Longitudinal	cg00294552	126	1.38	[-4.611-7.371]	0.65253	0.9502	0.84207	0.02221	0.20462	N_Shore	chr5:142780486
		Brain Imaging	Ventricular Volume	Longitudinal	cg16219186	126	7.8572	[-0.403-16.117]	0.06494	0.8525	0.88479	0.02148	0.22312	N_Shore	chr5:142780531
		Brain Imaging	Ventricular Volume	Longitudinal	cg08845721	126	4.4038	[-3.825-12.633]	0.29653	0.8525	0.90291	0.02257	0.35006	N_Shore	chr5:142780693
		Brain Imaging	Ventricular Volume	Longitudinal	cg12969488	126	-3.6116	[-8.117-0.894]	0.11905	0.8525	0.6959	0.03946	0.36342	N_Shore	chr5:142780984
		Brain Imaging	Ventricular Volume	Longitudinal	cg07733851	126	-2.0581	[-4.901-0.785]	0.15881	0.8525	0.31012	0.05444	0.48866	N_Shore	chr5:142781498
		Brain Imaging	Ventricular Volume	Longitudinal	cg27122725	126	-11.004	[-25.099-3.091]	0.12886	0.8525	0.08247	0.03649	0.61758	N_Shore	chr5:142781723
		Brain Imaging	Ventricular Volume	Longitudinal	cg06952416	126	-1.9937	[-10.739-6.751]	0.65587	0.9502	0.10317	0.01595	0.14679	N_Shore	chr5:142781736
		Brain Imaging	Ventricular Volume	Longitudinal	cg15910486	126	-1.4998	[-13.766-10.767]	0.81106	0.9502	0.06987	0.01223	0.07877	Island	chr5:142783621
		Brain Imaging	Ventricular Volume	Longitudinal	cg01967637	126	3.152	[-7.976-14.28]	0.57989	0.9502	0.05849	0.01419	0.08687	Island	chr5:142784019
		Brain Imaging	Ventricular Volume	Longitudinal	cg26464411	126	0.9429	[-10.276-12.162]	0.86945	0.9502	0.0622	0.01192	0.08127	Island	chr5:142784222
		Brain Imaging	Ventricular Volume	Longitudinal	cg06968181	126	12.4925	[-15.3-40.285]	0.38023	0.8745	0.05291	0.02403	0.66787	Island	chr5:142784323
		Brain Imaging	Ventricular Volume	Longitudinal	cg21702128	126	-6.9755	[-20.613-6.662]	0.31828	0.8569	0.08227	0.00965	0.07742	Island	chr5:142784721
		Brain Imaging	Ventricular Volume	Longitudinal	cg18718518	126	-4.6074	[-7.848--1.367]	0.00628	0.468	0.53255	0.05217	0.3892	S_Shore	chr5:142785455
		Brain Imaging	Ventricular Volume	Longitudinal	cg13764763	126	4.2579	[0.872-7.644]	0.01526	0.468	0.85356	0.05856	0.5219	S_Shore	chr5:142785501
		Brain Imaging	Ventricular Volume	Longitudinal	cg16224829	126	-1.2778	[-5.72-3.164]	0.57402	0.9502	0.79156	0.03531	0.28375	OpenSea	chr5:142792698
		Brain Imaging	Ventricular Volume	Longitudinal	cg01751279	126	1.2569	[-3.796-6.309]	0.62683	0.9502	0.83882	0.03986	0.35649	OpenSea	chr5:142793924
		Brain Imaging	Ventricular Volume	Longitudinal	cg23430507	126	2.6251	[-4.689-9.939]	0.48324	0.9502	0.67871	0.03655	0.31636	OpenSea	chr5:142798375
		Brain Imaging	Ventricular Volume	Longitudinal	cg17349736	126	0.9463	[-10.448-12.34]	0.87099	0.9502	0.8687	0.01502	0.1392	OpenSea	chr5:142802329
		Brain Imaging	Ventricular Volume	Longitudinal	cg14438279	126	1.1066	[-3.57-5.783]	0.6437	0.9502	0.80706	0.05892	0.46785	OpenSea	chr5:142806343
		Brain Imaging	Ventricular Volume	Longitudinal	cg08423118	126	0.6981	[-1.34-2.737]	0.50346	0.9502	0.77492	0.07191	0.32112	OpenSea	chr5:142808610
		Brain Imaging	Ventricular Volume	Longitudinal	cg23776787	126	13.3809	[-1.835-28.597]	0.08759	0.8525	0.05181	0.01906	0.42487	OpenSea	chr5:142814315
		Brain Imaging	Ventricular Volume	Longitudinal	cg03906910	126	4.3395	[-1.166-9.845]	0.12524	0.8525	0.22081	0.05239	0.37839	OpenSea	chr5:142814388
		Brain Imaging	Ventricular Volume	Longitudinal	cg07589972	126	-0.7741	[-20.27-18.721]	0.93811	0.9697	0.90005	0.01417	0.2547	OpenSea	chr5:142815463
		Brain Imaging	Ventricular Volume	Longitudinal	cg12466613	126	-5.2142	[-28.206-17.778]	0.65755	0.9502	0.91748	0.01192	0.24478	OpenSea	chr5:142815469
		Brain Imaging	Ventricular Volume	Longitudinal	cg21979215	126	-0.79	[-2.819-1.239]	0.44711	0.9141	0.76917	0.06877	0.39558	OpenSea	chr5:142815807
		Brain Imaging	Ventricular Volume	Longitudinal	cg11022710	126	1.912	[-9.731-13.555]	0.74816	0.9502	0.90751	0.01966	0.20763	OpenSea	chr5:142820479
		Brain Imaging	White Matter Volume	Cross-Sectional	cg23650353	292	-231.535	[-461.172--1.898]	0.04912	0.5326	0.92108	0.028	0.43394	OpenSea	chr4:148993643
		Brain Imaging	White Matter Volume	Cross-Sectional	cg19491599	292	12.7164	[-178.335-203.768]	0.8963	0.9945	0.84529	0.0161	0.20857	OpenSea	chr4:149000607
		Brain Imaging	White Matter Volume	Cross-Sectional	cg10207656	292	97.6803	[-145.232-340.593]	0.43128	0.9027	0.90855	0.01373	0.20071	OpenSea	chr4:149019526
		Brain Imaging	White Matter Volume	Cross-Sectional	cg09143276	292	6.7149	[-123.449-136.879]	0.91953	0.9945	0.80845	0.02074	0.13091	OpenSea	chr4:149066518
		Brain Imaging	White Matter Volume	Cross-Sectional	cg13000004	292	130.787	[-111.022-372.596]	0.29002	0.8338	0.86983	0.01161	0.09813	OpenSea	chr4:149074093
		Brain Imaging	White Matter Volume	Cross-Sectional	cg10590842	292	-41.0336	[-309.623-227.556]	0.76483	0.9945	0.9034	0.01143	0.10122	OpenSea	chr4:149083955
		Brain Imaging	White Matter Volume	Cross-Sectional	cg21701890	292	108.175	[-14.75-231.1]	0.08568	0.5822	0.61622	0.02898	0.23369	OpenSea	chr4:149094632
		Brain Imaging	White Matter Volume	Cross-Sectional	cg27234800	292	-2.6831	[-48.332-42.966]	0.90837	0.9945	0.89127	0.0525	0.39493	OpenSea	chr4:149116611
		Brain Imaging	White Matter Volume	Cross-Sectional	cg25672354	292	-165.087	[-325.749--4.424]	0.04498	0.5326	0.86697	0.01933	0.23574	OpenSea	chr4:149122383
		Brain Imaging	White Matter Volume	Cross-Sectional	cg10993059	292	-6.3584	[-246.79-234.073]	0.9587	0.9945	0.892	0.014	0.24786	OpenSea	chr4:149123062
		Brain Imaging	White Matter Volume	Cross-Sectional	cg07335874	292	-15.8681	[-268.155-236.419]	0.90198	0.9945	0.89734	0.01678	0.25463	OpenSea	chr4:149136507
		Brain Imaging	White Matter Volume	Cross-Sectional	cg08264907	292	-128.096	[-467.504-211.312]	0.46009	0.9027	0.90365	0.00834	0.08404	OpenSea	chr4:149144045
		Brain Imaging	White Matter Volume	Cross-Sectional	cg07275757	292	-159.841	[-413.807-94.125]	0.2184	0.7576	0.89578	0.01331	0.13086	OpenSea	chr4:149189974
		Brain Imaging	White Matter Volume	Cross-Sectional	cg13157799	292	14.0743	[-249.605-277.753]	0.91675	0.9945	0.05908	0.01227	0.14832	OpenSea	chr4:149191991
		Brain Imaging	White Matter Volume	Cross-Sectional	cg00328411	292	-57.1394	[-401.607-287.328]	0.74534	0.9945	0.90656	0.00839	0.10838	OpenSea	chr4:149205617
		Brain Imaging	White Matter Volume	Cross-Sectional	cg02471166	292	-27.5618	[-141.908-86.784]	0.63699	0.9945	0.62905	0.02431	0.28086	OpenSea	chr4:149244985
		Brain Imaging	White Matter Volume	Cross-Sectional	cg27225476	292	31.2937	[-134.543-197.13]	0.71177	0.9945	0.85878	0.01502	0.11725	OpenSea	chr4:149275542
		Brain Imaging	White Matter Volume	Cross-Sectional	cg06240648	292	39.3879	[-279.858-358.634]	0.8091	0.9945	0.90857	0.00875	0.08216	OpenSea	chr4:149289762
		Brain Imaging	White Matter Volume	Cross-Sectional	cg04867484	292	-0.5288	[-151.689-150.631]	0.99453	0.9945	0.06179	0.03171	0.6046	OpenSea	chr4:149297469
		Brain Imaging	White Matter Volume	Cross-Sectional	cg19496136	292	51.0392	[-20.523-122.601]	0.16326	0.7271	0.74636	0.06158	0.84904	OpenSea	chr4:149336765
		Brain Imaging	White Matter Volume	Cross-Sectional	cg17253842	292	58.667	[-126.206-243.54]	0.53447	0.9456	0.87057	0.02004	0.40157	OpenSea	chr4:149347991
		Brain Imaging	White Matter Volume	Cross-Sectional	cg19650300	292	-57.3314	[-282.603-167.94]	0.6183	0.9945	0.87161	0.0124	0.12937	OpenSea	chr4:149357960
		Brain Imaging	White Matter Volume	Cross-Sectional	cg09238384	292	253.524	[14.776-492.272]	0.03832	0.5326	0.88033	0.01059	0.10479	OpenSea	chr4:149358199
		Brain Imaging	White Matter Volume	Cross-Sectional	cg07651033	292	-159.75	[-342.974-23.475]	0.08859	0.5822	0.891	0.01412	0.08448	OpenSea	chr4:149359043
		Brain Imaging	White Matter Volume	Cross-Sectional	cg23329208	292	22.9424	[-237.289-283.174]	0.86294	0.9945	0.89218	0.01003	0.08891	N_Shelf	chr4:149360981
		Brain Imaging	White Matter Volume	Cross-Sectional	cg05437692	292	-46.1662	[-140.231-47.899]	0.33692	0.8815	0.28837	0.04393	0.32226	N_Shore	chr4:149362435
		Brain Imaging	White Matter Volume	Cross-Sectional	cg27460943	292	-110.11	[-262.76-42.541]	0.15855	0.7271	0.08292	0.02603	0.31306	N_Shore	chr4:149362809
		Brain Imaging	White Matter Volume	Cross-Sectional	cg01576854	292	-181.38	[-452.772-90.011]	0.1913	0.7271	0.07386	0.01207	0.20464	Island	chr4:149363450
		Brain Imaging	White Matter Volume	Cross-Sectional	cg13996731	292	-129.434	[-423.038-164.171]	0.38831	0.8976	0.05943	0.00984	0.12921	Island	chr4:149363522
		Brain Imaging	White Matter Volume	Cross-Sectional	cg20140452	292	1.2222	[-278.059-280.503]	0.99316	0.9945	0.07045	0.00971	0.0619	Island	chr4:149363715
		Brain Imaging	White Matter Volume	Cross-Sectional	cg10621979	292	164.317	[-112.053-440.686]	0.24489	0.7576	0.05355	0.018	0.29521	Island	chr4:149365824
		Brain Imaging	White Matter Volume	Cross-Sectional	cg11239219	292	-189.764	[-446.094-66.566]	0.14791	0.7271	0.05479	0.02153	0.3658	Island	chr4:149365887
		Brain Imaging	White Matter Volume	Cross-Sectional	cg10002915	292	30.0887	[-3.146-63.323]	0.07708	0.5822	0.54242	0.08455	0.73095	S_Shelf	chr4:149369175
		Brain Imaging	White Matter Volume	Cross-Sectional	cg15374100	292	280.045	[51.49-508.6]	0.01698	0.3906	0.86961	0.01354	0.2065	OpenSea	chr5:142651239
		Brain Imaging	White Matter Volume	Cross-Sectional	cg15740681	292	410.969	[103.37-718.568]	0.00931	0.2856	0.89095	0.00925	0.09622	OpenSea	chr5:142653066
		Brain Imaging	White Matter Volume	Cross-Sectional	cg26081259	292	350.773	[-1.681-703.228]	0.05211	0.5326	0.92585	0.00714	0.05144	OpenSea	chr5:142659682
		Brain Imaging	White Matter Volume	Cross-Sectional	cg13514002	292	165.695	[-85.752-417.142]	0.19758	0.7271	0.9104	0.01216	0.16497	OpenSea	chr5:142677292
		Brain Imaging	White Matter Volume	Cross-Sectional	cg24801588	292	106.831	[-136.495-350.157]	0.39024	0.8976	0.87613	0.01121	0.08119	OpenSea	chr5:142689858
		Brain Imaging	White Matter Volume	Cross-Sectional	cg00407401	292	47.7407	[-214.358-309.84]	0.72136	0.9945	0.88336	0.0113	0.12225	OpenSea	chr5:142690959
		Brain Imaging	White Matter Volume	Cross-Sectional	cg19457823	292	19.5987	[-38.784-77.982]	0.51111	0.9404	0.85324	0.04572	0.44993	OpenSea	chr5:142692961
		Brain Imaging	White Matter Volume	Cross-Sectional	cg12741214	292	-11.6949	[-366.945-343.555]	0.9486	0.9945	0.92153	0.00739	0.05446	OpenSea	chr5:142695619
		Brain Imaging	White Matter Volume	Cross-Sectional	cg04457787	292	80.1327	[-252.787-413.053]	0.63747	0.9945	0.91851	0.00864	0.10367	OpenSea	chr5:142695636
		Brain Imaging	White Matter Volume	Cross-Sectional	cg20728768	292	-9.5506	[-88.727-69.626]	0.81328	0.9945	0.28495	0.05593	0.42144	OpenSea	chr5:142696594
		Brain Imaging	White Matter Volume	Cross-Sectional	cg25708981	292	-13.7184	[-90.506-63.069]	0.72648	0.9945	0.81142	0.04619	0.93615	OpenSea	chr5:142697868
		Brain Imaging	White Matter Volume	Cross-Sectional	cg19645279	292	6.112	[-81.024-93.248]	0.89075	0.9945	0.50627	0.03156	0.23017	OpenSea	chr5:142702733
		Brain Imaging	White Matter Volume	Cross-Sectional	cg19176661	292	99.4718	[-167.153-366.097]	0.46526	0.9027	0.90339	0.00908	0.09406	OpenSea	chr5:142718549
		Brain Imaging	White Matter Volume	Cross-Sectional	cg07715663	292	-79.1955	[-427.053-268.662]	0.65578	0.9945	0.89993	0.0077	0.06068	OpenSea	chr5:142721796
		Brain Imaging	White Matter Volume	Cross-Sectional	cg24052866	292	52.0506	[-25.612-129.713]	0.19006	0.7271	0.69336	0.03805	0.44354	OpenSea	chr5:142727470
		Brain Imaging	White Matter Volume	Cross-Sectional	cg22233604	292	55.5193	[-83.178-194.216]	0.43338	0.9027	0.80239	0.02828	0.34628	OpenSea	chr5:142729377
		Brain Imaging	White Matter Volume	Cross-Sectional	cg03857453	292	-57.3706	[-138.25-23.508]	0.16555	0.7271	0.71757	0.04588	0.42058	OpenSea	chr5:142729913
		Brain Imaging	White Matter Volume	Cross-Sectional	cg15115787	292	-3.7019	[-102.793-95.389]	0.94168	0.9945	0.2334	0.0467	0.33835	OpenSea	chr5:142730701
		Brain Imaging	White Matter Volume	Cross-Sectional	cg12888360	292	-2.1007	[-87.344-83.143]	0.96151	0.9945	0.19071	0.0335	0.21819	OpenSea	chr5:142732502
		Brain Imaging	White Matter Volume	Cross-Sectional	cg18484679	292	-69.2981	[-255.224-116.628]	0.46568	0.9027	0.85401	0.0155	0.16305	OpenSea	chr5:142740314
		Brain Imaging	White Matter Volume	Cross-Sectional	cg16586394	292	-219.413	[-482.691-43.865]	0.10351	0.5952	0.90913	0.01422	0.19939	OpenSea	chr5:142757011
		Brain Imaging	White Matter Volume	Cross-Sectional	cg25535999	292	-223.014	[-476.567-30.538]	0.08583	0.5822	0.89419	0.01191	0.0902	OpenSea	chr5:142757312
		Brain Imaging	White Matter Volume	Cross-Sectional	cg03746860	292	55.2518	[-194.31-304.814]	0.66467	0.9945	0.89502	0.01114	0.14119	OpenSea	chr5:142759375
		Brain Imaging	White Matter Volume	Cross-Sectional	cg20598211	292	-93.6845	[-384.982-197.613]	0.52898	0.9456	0.91627	0.01158	0.20941	OpenSea	chr5:142762454
		Brain Imaging	White Matter Volume	Cross-Sectional	cg05483455	292	-68.7012	[-449.948-312.546]	0.72421	0.9945	0.92855	0.00637	0.07369	OpenSea	chr5:142762613
		Brain Imaging	White Matter Volume	Cross-Sectional	cg16594263	292	141.449	[-242.61-525.508]	0.47099	0.9027	0.91923	0.01644	0.42455	OpenSea	chr5:142768048
		Brain Imaging	White Matter Volume	Cross-Sectional	cg16535116	292	63.5414	[-77.909-204.991]	0.37937	0.8976	0.82395	0.0209	0.17773	OpenSea	chr5:142769612
		Brain Imaging	White Matter Volume	Cross-Sectional	cg05900547	292	94.4183	[-60.734-249.57]	0.23398	0.7576	0.82362	0.01868	0.15468	OpenSea	chr5:142769791
		Brain Imaging	White Matter Volume	Cross-Sectional	cg19432243	292	13.9711	[-37.025-64.967]	0.59172	0.9945	0.75237	0.06043	0.89556	OpenSea	chr5:142770757
		Brain Imaging	White Matter Volume	Cross-Sectional	cg19820298	292	57.7077	[8.645-106.77]	0.02189	0.4027	0.78285	0.05639	0.30689	OpenSea	chr5:142770782
		Brain Imaging	White Matter Volume	Cross-Sectional	cg27107893	292	12.7276	[-13.64-39.095]	0.34493	0.8815	0.79309	0.09578	0.9445	OpenSea	chr5:142776274
		Brain Imaging	White Matter Volume	Cross-Sectional	cg17342132	292	54.0768	[-79.977-188.13]	0.42982	0.9027	0.86999	0.03297	0.31216	N_Shore	chr5:142780254
		Brain Imaging	White Matter Volume	Cross-Sectional	cg07742588	292	112.161	[40.406-183.916]	0.0024	0.184	0.78914	0.05595	0.91885	N_Shore	chr5:142780439
		Brain Imaging	White Matter Volume	Cross-Sectional	cg00294552	292	-26.8956	[-149.515-95.724]	0.6676	0.9945	0.84207	0.02221	0.20462	N_Shore	chr5:142780486
		Brain Imaging	White Matter Volume	Cross-Sectional	cg16219186	292	-6.8998	[-163.132-149.332]	0.93108	0.9945	0.88479	0.02148	0.22312	N_Shore	chr5:142780531
		Brain Imaging	White Matter Volume	Cross-Sectional	cg08845721	292	65.8876	[-91.316-223.091]	0.41208	0.9027	0.90291	0.02257	0.35006	N_Shore	chr5:142780693
		Brain Imaging	White Matter Volume	Cross-Sectional	cg12969488	292	1.5508	[-79.85-82.952]	0.97024	0.9945	0.6959	0.03946	0.36342	N_Shore	chr5:142780984
		Brain Imaging	White Matter Volume	Cross-Sectional	cg07733851	292	-11.1493	[-58.633-36.335]	0.64573	0.9945	0.31012	0.05444	0.48866	N_Shore	chr5:142781498
		Brain Imaging	White Matter Volume	Cross-Sectional	cg27122725	292	-176.535	[-427.041-73.971]	0.16832	0.7271	0.08247	0.03649	0.61758	N_Shore	chr5:142781723
		Brain Imaging	White Matter Volume	Cross-Sectional	cg06952416	292	-9.9899	[-185.39-165.41]	0.9112	0.9945	0.10317	0.01595	0.14679	N_Shore	chr5:142781736
		Brain Imaging	White Matter Volume	Cross-Sectional	cg15910486	292	-112.001	[-342.388-118.387]	0.34151	0.8815	0.06987	0.01223	0.07877	Island	chr5:142783621
		Brain Imaging	White Matter Volume	Cross-Sectional	cg01967637	292	5.1426	[-187.329-197.614]	0.95827	0.9945	0.05849	0.01419	0.08687	Island	chr5:142784019
		Brain Imaging	White Matter Volume	Cross-Sectional	cg26464411	292	-72.7463	[-279.929-134.436]	0.4919	0.9236	0.0622	0.01192	0.08127	Island	chr5:142784222
		Brain Imaging	White Matter Volume	Cross-Sectional	cg06968181	292	98.4378	[-438.01-634.885]	0.71938	0.9945	0.05291	0.02403	0.66787	Island	chr5:142784323
		Brain Imaging	White Matter Volume	Cross-Sectional	cg21702128	292	-257.836	[-530.538-14.865]	0.06492	0.5822	0.08227	0.00965	0.07742	Island	chr5:142784721
		Brain Imaging	White Matter Volume	Cross-Sectional	cg18718518	292	12.612	[-43.495-68.719]	0.65986	0.9945	0.53255	0.05217	0.3892	S_Shore	chr5:142785455
		Brain Imaging	White Matter Volume	Cross-Sectional	cg13764763	292	28.3727	[-19.568-76.313]	0.24705	0.7576	0.85356	0.05856	0.5219	S_Shore	chr5:142785501
		Brain Imaging	White Matter Volume	Cross-Sectional	cg16224829	292	-50.0438	[-133.066-32.978]	0.23844	0.7576	0.79156	0.03531	0.28375	OpenSea	chr5:142792698
		Brain Imaging	White Matter Volume	Cross-Sectional	cg01751279	292	-0.463	[-102.442-101.516]	0.99291	0.9945	0.83882	0.03986	0.35649	OpenSea	chr5:142793924
		Brain Imaging	White Matter Volume	Cross-Sectional	cg23430507	292	3.5307	[-118.275-125.336]	0.95474	0.9945	0.67871	0.03655	0.31636	OpenSea	chr5:142798375
		Brain Imaging	White Matter Volume	Cross-Sectional	cg17349736	292	16.5378	[-178.711-211.787]	0.86827	0.9945	0.8687	0.01502	0.1392	OpenSea	chr5:142802329
		Brain Imaging	White Matter Volume	Cross-Sectional	cg14438279	292	-77.584	[-170.346-15.178]	0.10229	0.5952	0.80706	0.05892	0.46785	OpenSea	chr5:142806343
		Brain Imaging	White Matter Volume	Cross-Sectional	cg08423118	292	-3.0954	[-42.972-36.781]	0.87918	0.9945	0.77492	0.07191	0.32112	OpenSea	chr5:142808610
		Brain Imaging	White Matter Volume	Cross-Sectional	cg23776787	292	417.31	[135.506-699.115]	0.004	0.184	0.05181	0.01906	0.42487	OpenSea	chr5:142814315
		Brain Imaging	White Matter Volume	Cross-Sectional	cg03906910	292	47.8641	[-40.079-135.807]	0.28701	0.8338	0.22081	0.05239	0.37839	OpenSea	chr5:142814388
		Brain Imaging	White Matter Volume	Cross-Sectional	cg07589972	292	235.748	[-120.762-592.259]	0.19603	0.7271	0.90005	0.01417	0.2547	OpenSea	chr5:142815463
		Brain Imaging	White Matter Volume	Cross-Sectional	cg12466613	292	189.959	[-220.205-600.123]	0.36481	0.8976	0.91748	0.01192	0.24478	OpenSea	chr5:142815469
		Brain Imaging	White Matter Volume	Cross-Sectional	cg21979215	292	19.9552	[-18.709-58.619]	0.31262	0.8715	0.76917	0.06877	0.39558	OpenSea	chr5:142815807
		Brain Imaging	White Matter Volume	Cross-Sectional	cg11022710	292	20.1871	[-189.774-230.149]	0.85066	0.9945	0.90751	0.01966	0.20763	OpenSea	chr5:142820479
		Brain Imaging	White Matter Volume	Longitudinal	cg23650353	126	2.4378	[-7.79-12.666]	0.64131	0.9574	0.92108	0.028	0.43394	OpenSea	chr4:148993643
		Brain Imaging	White Matter Volume	Longitudinal	cg19491599	126	2.5715	[-5.663-10.806]	0.54174	0.9574	0.84529	0.0161	0.20857	OpenSea	chr4:149000607
		Brain Imaging	White Matter Volume	Longitudinal	cg10207656	126	-1.0496	[-11.049-8.95]	0.83738	0.9574	0.90855	0.01373	0.20071	OpenSea	chr4:149019526
		Brain Imaging	White Matter Volume	Longitudinal	cg09143276	126	2.8644	[-2.239-7.968]	0.2737	0.9574	0.80845	0.02074	0.13091	OpenSea	chr4:149066518
		Brain Imaging	White Matter Volume	Longitudinal	cg13000004	126	6.3178	[-4.347-16.982]	0.2481	0.9574	0.86983	0.01161	0.09813	OpenSea	chr4:149074093
		Brain Imaging	White Matter Volume	Longitudinal	cg10590842	126	-0.9194	[-11.38-9.541]	0.86354	0.9574	0.9034	0.01143	0.10122	OpenSea	chr4:149083955
		Brain Imaging	White Matter Volume	Longitudinal	cg21701890	126	-1.599	[-7.189-3.991]	0.57616	0.9574	0.61622	0.02898	0.23369	OpenSea	chr4:149094632
		Brain Imaging	White Matter Volume	Longitudinal	cg27234800	126	0.469	[-1.693-2.631]	0.67149	0.9574	0.89127	0.0525	0.39493	OpenSea	chr4:149116611
		Brain Imaging	White Matter Volume	Longitudinal	cg25672354	126	3.5993	[-3.14-10.339]	0.29751	0.9574	0.86697	0.01933	0.23574	OpenSea	chr4:149122383
		Brain Imaging	White Matter Volume	Longitudinal	cg10993059	126	-1.2486	[-11.224-8.727]	0.80666	0.9574	0.892	0.014	0.24786	OpenSea	chr4:149123062
		Brain Imaging	White Matter Volume	Longitudinal	cg07335874	126	-2.0994	[-13.979-9.78]	0.72972	0.9574	0.89734	0.01678	0.25463	OpenSea	chr4:149136507
		Brain Imaging	White Matter Volume	Longitudinal	cg08264907	126	1.7111	[-13.904-17.327]	0.83034	0.9574	0.90365	0.00834	0.08404	OpenSea	chr4:149144045
		Brain Imaging	White Matter Volume	Longitudinal	cg07275757	126	4.0599	[-6.944-15.063]	0.47111	0.9574	0.89578	0.01331	0.13086	OpenSea	chr4:149189974
		Brain Imaging	White Matter Volume	Longitudinal	cg13157799	126	13.7736	[1.172-26.375]	0.03437	0.8377	0.05908	0.01227	0.14832	OpenSea	chr4:149191991
		Brain Imaging	White Matter Volume	Longitudinal	cg00328411	126	1.8163	[-13.713-17.346]	0.81911	0.9574	0.90656	0.00839	0.10838	OpenSea	chr4:149205617
		Brain Imaging	White Matter Volume	Longitudinal	cg02471166	126	3.0748	[-1.839-7.988]	0.22262	0.9574	0.62905	0.02431	0.28086	OpenSea	chr4:149244985
		Brain Imaging	White Matter Volume	Longitudinal	cg27225476	126	-4.2432	[-11.576-3.09]	0.25921	0.9574	0.85878	0.01502	0.11725	OpenSea	chr4:149275542
		Brain Imaging	White Matter Volume	Longitudinal	cg06240648	126	4.5424	[-9.201-18.286]	0.51847	0.9574	0.90857	0.00875	0.08216	OpenSea	chr4:149289762
		Brain Imaging	White Matter Volume	Longitudinal	cg04867484	126	-1.944	[-7.926-4.038]	0.52546	0.9574	0.06179	0.03171	0.6046	OpenSea	chr4:149297469
		Brain Imaging	White Matter Volume	Longitudinal	cg19496136	126	0.675	[-2.157-3.507]	0.64132	0.9574	0.74636	0.06158	0.84904	OpenSea	chr4:149336765
		Brain Imaging	White Matter Volume	Longitudinal	cg17253842	126	0.9791	[-7.706-9.665]	0.82553	0.9574	0.87057	0.02004	0.40157	OpenSea	chr4:149347991
		Brain Imaging	White Matter Volume	Longitudinal	cg19650300	126	2.2645	[-7.163-11.692]	0.63874	0.9574	0.87161	0.0124	0.12937	OpenSea	chr4:149357960
		Brain Imaging	White Matter Volume	Longitudinal	cg09238384	126	0.6518	[-8.773-10.077]	0.89243	0.9602	0.88033	0.01059	0.10479	OpenSea	chr4:149358199
		Brain Imaging	White Matter Volume	Longitudinal	cg07651033	126	8.7607	[-0.07-17.592]	0.0544	0.8377	0.891	0.01412	0.08448	OpenSea	chr4:149359043
		Brain Imaging	White Matter Volume	Longitudinal	cg23329208	126	-4.4909	[-15.878-6.897]	0.4412	0.9574	0.89218	0.01003	0.08891	N_Shelf	chr4:149360981
		Brain Imaging	White Matter Volume	Longitudinal	cg05437692	126	2.5383	[-1.44-6.517]	0.21374	0.9574	0.28837	0.04393	0.32226	N_Shore	chr4:149362435
		Brain Imaging	White Matter Volume	Longitudinal	cg27460943	126	-2.5358	[-9.435-4.363]	0.47279	0.9574	0.08292	0.02603	0.31306	N_Shore	chr4:149362809
		Brain Imaging	White Matter Volume	Longitudinal	cg01576854	126	2.0845	[-10.11-14.28]	0.73824	0.9574	0.07386	0.01207	0.20464	Island	chr4:149363450
		Brain Imaging	White Matter Volume	Longitudinal	cg13996731	126	4.8733	[-7.356-17.102]	0.43643	0.9574	0.05943	0.00984	0.12921	Island	chr4:149363522
		Brain Imaging	White Matter Volume	Longitudinal	cg20140452	126	-0.7989	[-12.938-11.34]	0.8976	0.9602	0.07045	0.00971	0.0619	Island	chr4:149363715
		Brain Imaging	White Matter Volume	Longitudinal	cg10621979	126	7.4619	[-6.415-21.339]	0.29423	0.9574	0.05355	0.018	0.29521	Island	chr4:149365824
		Brain Imaging	White Matter Volume	Longitudinal	cg11239219	126	-1.7899	[-12.495-8.915]	0.74375	0.9574	0.05479	0.02153	0.3658	Island	chr4:149365887
		Brain Imaging	White Matter Volume	Longitudinal	cg10002915	126	0.1224	[-1.389-1.633]	0.87417	0.9574	0.54242	0.08455	0.73095	S_Shelf	chr4:149369175
		Brain Imaging	White Matter Volume	Longitudinal	cg15374100	126	-5.4855	[-15.881-4.911]	0.30331	0.9574	0.86961	0.01354	0.2065	OpenSea	chr5:142651239
		Brain Imaging	White Matter Volume	Longitudinal	cg15740681	126	0.4885	[-13.911-14.888]	0.94711	0.9682	0.89095	0.00925	0.09622	OpenSea	chr5:142653066
		Brain Imaging	White Matter Volume	Longitudinal	cg26081259	126	-7.887	[-23.094-7.32]	0.3116	0.9574	0.92585	0.00714	0.05144	OpenSea	chr5:142659682
		Brain Imaging	White Matter Volume	Longitudinal	cg13514002	126	-1.4958	[-12.465-9.474]	0.78976	0.9574	0.9104	0.01216	0.16497	OpenSea	chr5:142677292
		Brain Imaging	White Matter Volume	Longitudinal	cg24801588	126	4.5058	[-6.948-15.96]	0.44234	0.9574	0.87613	0.01121	0.08119	OpenSea	chr5:142689858
		Brain Imaging	White Matter Volume	Longitudinal	cg00407401	126	2.0454	[-8.951-13.042]	0.71614	0.9574	0.88336	0.0113	0.12225	OpenSea	chr5:142690959
		Brain Imaging	White Matter Volume	Longitudinal	cg19457823	126	-1.2595	[-8.55-6.031]	0.73557	0.9574	0.85324	0.04572	0.44993	OpenSea	chr5:142692961
		Brain Imaging	White Matter Volume	Longitudinal	cg12741214	126	-4.5461	[-19.619-10.526]	0.55562	0.9574	0.92153	0.00739	0.05446	OpenSea	chr5:142695619
		Brain Imaging	White Matter Volume	Longitudinal	cg04457787	126	-0.6154	[-14.565-13.334]	0.93125	0.9682	0.91851	0.00864	0.10367	OpenSea	chr5:142695636
		Brain Imaging	White Matter Volume	Longitudinal	cg20728768	126	-1.0015	[-4.153-2.15]	0.5346	0.9574	0.28495	0.05593	0.42144	OpenSea	chr5:142696594
		Brain Imaging	White Matter Volume	Longitudinal	cg25708981	126	-3.49	[-7.164-0.184]	0.06529	0.8581	0.81142	0.04619	0.93615	OpenSea	chr5:142697868
		Brain Imaging	White Matter Volume	Longitudinal	cg19645279	126	0.4403	[-3.046-3.926]	0.80493	0.9574	0.50627	0.03156	0.23017	OpenSea	chr5:142702733
		Brain Imaging	White Matter Volume	Longitudinal	cg19176661	126	2.9441	[-7.513-13.402]	0.58221	0.9574	0.90339	0.00908	0.09406	OpenSea	chr5:142718549
		Brain Imaging	White Matter Volume	Longitudinal	cg07715663	126	-1.3263	[-16.561-13.908]	0.86482	0.9574	0.89993	0.0077	0.06068	OpenSea	chr5:142721796
		Brain Imaging	White Matter Volume	Longitudinal	cg24052866	126	1.2326	[-1.942-4.407]	0.44831	0.9574	0.69336	0.03805	0.44354	OpenSea	chr5:142727470
		Brain Imaging	White Matter Volume	Longitudinal	cg22233604	126	1.3111	[-5.093-7.715]	0.68901	0.9574	0.80239	0.02828	0.34628	OpenSea	chr5:142729377
		Brain Imaging	White Matter Volume	Longitudinal	cg03857453	126	2.4164	[-1.509-6.342]	0.23022	0.9574	0.71757	0.04588	0.42058	OpenSea	chr5:142729913
		Brain Imaging	White Matter Volume	Longitudinal	cg15115787	126	3.9352	[-0.535-8.406]	0.08729	0.8923	0.2334	0.0467	0.33835	OpenSea	chr5:142730701
		Brain Imaging	White Matter Volume	Longitudinal	cg12888360	126	0.6229	[-3.089-4.335]	0.74286	0.9574	0.19071	0.0335	0.21819	OpenSea	chr5:142732502
		Brain Imaging	White Matter Volume	Longitudinal	cg18484679	126	-2.6371	[-11.83-6.555]	0.57508	0.9574	0.85401	0.0155	0.16305	OpenSea	chr5:142740314
		Brain Imaging	White Matter Volume	Longitudinal	cg16586394	126	-2.8566	[-13.101-7.388]	0.5858	0.9574	0.90913	0.01422	0.19939	OpenSea	chr5:142757011
		Brain Imaging	White Matter Volume	Longitudinal	cg25535999	126	-8.5356	[-21.595-4.523]	0.20286	0.9574	0.89419	0.01191	0.0902	OpenSea	chr5:142757312
		Brain Imaging	White Matter Volume	Longitudinal	cg03746860	126	1.0005	[-9.811-11.812]	0.8564	0.9574	0.89502	0.01114	0.14119	OpenSea	chr5:142759375
		Brain Imaging	White Matter Volume	Longitudinal	cg20598211	126	-6.8506	[-19.393-5.692]	0.28674	0.9574	0.91627	0.01158	0.20941	OpenSea	chr5:142762454
		Brain Imaging	White Matter Volume	Longitudinal	cg05483455	126	-16.886	[-32.871--0.901]	0.04075	0.8377	0.92855	0.00637	0.07369	OpenSea	chr5:142762613
		Brain Imaging	White Matter Volume	Longitudinal	cg16594263	126	-4.4203	[-21.021-12.181]	0.6028	0.9574	0.91923	0.01644	0.42455	OpenSea	chr5:142768048
		Brain Imaging	White Matter Volume	Longitudinal	cg16535116	126	-0.0638	[-5.897-5.769]	0.98295	0.9937	0.82395	0.0209	0.17773	OpenSea	chr5:142769612
		Brain Imaging	White Matter Volume	Longitudinal	cg05900547	126	5.7931	[-0.621-12.207]	0.07947	0.8923	0.82362	0.01868	0.15468	OpenSea	chr5:142769791
		Brain Imaging	White Matter Volume	Longitudinal	cg19432243	126	0.4297	[-1.915-2.775]	0.72012	0.9574	0.75237	0.06043	0.89556	OpenSea	chr5:142770757
		Brain Imaging	White Matter Volume	Longitudinal	cg19820298	126	0.2572	[-1.929-2.444]	0.81807	0.9574	0.78285	0.05639	0.30689	OpenSea	chr5:142770782
		Brain Imaging	White Matter Volume	Longitudinal	cg27107893	126	-0.7972	[-2.424-0.83]	0.33902	0.9574	0.79309	0.09578	0.9445	OpenSea	chr5:142776274
		Brain Imaging	White Matter Volume	Longitudinal	cg17342132	126	-0.5064	[-6.167-5.155]	0.86115	0.9574	0.86999	0.03297	0.31216	N_Shore	chr5:142780254
		Brain Imaging	White Matter Volume	Longitudinal	cg07742588	126	-0.5942	[-3.695-2.506]	0.70793	0.9574	0.78914	0.05595	0.91885	N_Shore	chr5:142780439
[truncated: 1,263 more rows]

## Sheet: Table S4
	Table S4. Linear regression results for interaction analyses between CpG sites x Stress trait and brain-health outcomes
	Study	Brain Health outcome			Stress Measure	CpG Site	n	Nominal P	FDR P	Mean Methylation	SD	Methylation Range	Region	Location Build37
	AIBL	Cognition	PACC	Cross-Sectional	HADS-A	cg23650353	298	0.2469	0.6489	0.92108	0.028	0.43394	OpenSea	chr4:148993643
		Cognition	PACC	Cross-Sectional	HADS-A	cg19491599	298	0.2275	0.6155	0.84529	0.0161	0.20857	OpenSea	chr4:149000607
		Cognition	PACC	Cross-Sectional	HADS-A	cg10207656	298	0.4037	0.794	0.90855	0.01373	0.20071	OpenSea	chr4:149019526
		Cognition	PACC	Cross-Sectional	HADS-A	cg09143276	298	0.5667	0.8409	0.80845	0.02074	0.13091	OpenSea	chr4:149066518
		Cognition	PACC	Cross-Sectional	HADS-A	cg13000004	298	0.7001	0.8848	0.86983	0.01161	0.09813	OpenSea	chr4:149074093
		Cognition	PACC	Cross-Sectional	HADS-A	cg10590842	298	0.0128	0.1685	0.9034	0.01143	0.10122	OpenSea	chr4:149083955
		Cognition	PACC	Cross-Sectional	HADS-A	cg21701890	298	0.2241	0.6155	0.61622	0.02898	0.23369	OpenSea	chr4:149094632
		Cognition	PACC	Cross-Sectional	HADS-A	cg27234800	298	0.793	0.9475	0.89127	0.0525	0.39493	OpenSea	chr4:149116611
		Cognition	PACC	Cross-Sectional	HADS-A	cg25672354	298	0.3046	0.7099	0.86697	0.01933	0.23574	OpenSea	chr4:149122383
		Cognition	PACC	Cross-Sectional	HADS-A	cg10993059	298	0.1645	0.5593	0.892	0.014	0.24786	OpenSea	chr4:149123062
		Cognition	PACC	Cross-Sectional	HADS-A	cg07335874	298	0.1081	0.4325	0.89734	0.01678	0.25463	OpenSea	chr4:149136507
		Cognition	PACC	Cross-Sectional	HADS-A	cg08264907	298	0.4694	0.794	0.90365	0.00834	0.08404	OpenSea	chr4:149144045
		Cognition	PACC	Cross-Sectional	HADS-A	cg07275757	298	0.9987	0.9992	0.89578	0.01331	0.13086	OpenSea	chr4:149189974
		Cognition	PACC	Cross-Sectional	HADS-A	cg13157799	298	0.5151	0.794	0.05908	0.01227	0.14832	OpenSea	chr4:149191991
		Cognition	PACC	Cross-Sectional	HADS-A	cg00328411	298	0.1159	0.4441	0.90656	0.00839	0.10838	OpenSea	chr4:149205617
		Cognition	PACC	Cross-Sectional	HADS-A	cg02471166	298	0.6712	0.8697	0.62905	0.02431	0.28086	OpenSea	chr4:149244985
		Cognition	PACC	Cross-Sectional	HADS-A	cg27225476	298	0.6143	0.8583	0.85878	0.01502	0.11725	OpenSea	chr4:149275542
		Cognition	PACC	Cross-Sectional	HADS-A	cg06240648	298	0.8718	0.9986	0.90857	0.00875	0.08216	OpenSea	chr4:149289762
		Cognition	PACC	Cross-Sectional	HADS-A	cg04867484	298	0.1791	0.5593	0.06179	0.03171	0.6046	OpenSea	chr4:149297469
		Cognition	PACC	Cross-Sectional	HADS-A	cg19496136	298	0.8346	0.9844	0.74636	0.06158	0.84904	OpenSea	chr4:149336765
		Cognition	PACC	Cross-Sectional	HADS-A	cg17253842	298	0.9844	0.9992	0.87057	0.02004	0.40157	OpenSea	chr4:149347991
		Cognition	PACC	Cross-Sectional	HADS-A	cg19650300	298	0.3336	0.7485	0.87161	0.0124	0.12937	OpenSea	chr4:149357960
		Cognition	PACC	Cross-Sectional	HADS-A	cg09238384	298	0.7021	0.8848	0.88033	0.01059	0.10479	OpenSea	chr4:149358199
		Cognition	PACC	Cross-Sectional	HADS-A	cg07651033	298	0.6626	0.8697	0.891	0.01412	0.08448	OpenSea	chr4:149359043
		Cognition	PACC	Cross-Sectional	HADS-A	cg23329208	298	0.2693	0.6755	0.89218	0.01003	0.08891	N_Shelf	chr4:149360981
		Cognition	PACC	Cross-Sectional	HADS-A	cg05437692	298	0.0023	0.1529	0.28837	0.04393	0.32226	N_Shore	chr4:149362435
		Cognition	PACC	Cross-Sectional	HADS-A	cg27460943	298	0.037	0.2454	0.08292	0.02603	0.31306	N_Shore	chr4:149362809
		Cognition	PACC	Cross-Sectional	HADS-A	cg01576854	298	0.665	0.8697	0.07386	0.01207	0.20464	Island	chr4:149363450
		Cognition	PACC	Cross-Sectional	HADS-A	cg13996731	298	0.7695	0.9315	0.05943	0.00984	0.12921	Island	chr4:149363522
		Cognition	PACC	Cross-Sectional	HADS-A	cg20140452	298	0.0085	0.1529	0.07045	0.00971	0.0619	Island	chr4:149363715
		Cognition	PACC	Cross-Sectional	HADS-A	cg10621979	298	0.9257	0.9986	0.05355	0.018	0.29521	Island	chr4:149365824
		Cognition	PACC	Cross-Sectional	HADS-A	cg11239219	298	0.4888	0.794	0.05479	0.02153	0.3658	Island	chr4:149365887
		Cognition	PACC	Cross-Sectional	HADS-A	cg10002915	298	0.0094	0.1529	0.54242	0.08455	0.73095	S_Shelf	chr4:149369175
		Cognition	PACC	Cross-Sectional	HADS-A	cg15374100	298	0.0746	0.4036	0.86961	0.01354	0.2065	OpenSea	chr5:142651239
		Cognition	PACC	Cross-Sectional	HADS-A	cg15740681	298	0.2057	0.5913	0.89095	0.00925	0.09622	OpenSea	chr5:142653066
		Cognition	PACC	Cross-Sectional	HADS-A	cg26081259	298	0.2894	0.7005	0.92585	0.00714	0.05144	OpenSea	chr5:142659682
		Cognition	PACC	Cross-Sectional	HADS-A	cg13514002	298	0.3774	0.794	0.9104	0.01216	0.16497	OpenSea	chr5:142677292
		Cognition	PACC	Cross-Sectional	HADS-A	cg24801588	298	0.655	0.8697	0.87613	0.01121	0.08119	OpenSea	chr5:142689858
		Cognition	PACC	Cross-Sectional	HADS-A	cg00407401	298	0.957	0.9986	0.88336	0.0113	0.12225	OpenSea	chr5:142690959
		Cognition	PACC	Cross-Sectional	HADS-A	cg19457823	298	0.0165	0.1708	0.85324	0.04572	0.44993	OpenSea	chr5:142692961
		Cognition	PACC	Cross-Sectional	HADS-A	cg12741214	298	0.5012	0.794	0.92153	0.00739	0.05446	OpenSea	chr5:142695619
		Cognition	PACC	Cross-Sectional	HADS-A	cg04457787	298	0.7161	0.8902	0.91851	0.00864	0.10367	OpenSea	chr5:142695636
		Cognition	PACC	Cross-Sectional	HADS-A	cg20728768	298	0.0649	0.3731	0.28495	0.05593	0.42144	OpenSea	chr5:142696594
		Cognition	PACC	Cross-Sectional	HADS-A	cg25708981	298	0.0067	0.1529	0.81142	0.04619	0.93615	OpenSea	chr5:142697868
		Cognition	PACC	Cross-Sectional	HADS-A	cg19645279	298	0.9587	0.9986	0.50627	0.03156	0.23017	OpenSea	chr5:142702733
		Cognition	PACC	Cross-Sectional	HADS-A	cg19176661	298	0.4617	0.794	0.90339	0.00908	0.09406	OpenSea	chr5:142718549
		Cognition	PACC	Cross-Sectional	HADS-A	cg07715663	298	0.4664	0.794	0.89993	0.0077	0.06068	OpenSea	chr5:142721796
		Cognition	PACC	Cross-Sectional	HADS-A	cg24052866	298	0.351	0.7688	0.69336	0.03805	0.44354	OpenSea	chr5:142727470
		Cognition	PACC	Cross-Sectional	HADS-A	cg22233604	298	0.3837	0.794	0.80239	0.02828	0.34628	OpenSea	chr5:142729377
		Cognition	PACC	Cross-Sectional	HADS-A	cg03857453	298	0.0186	0.1708	0.71757	0.04588	0.42058	OpenSea	chr5:142729913
		Cognition	PACC	Cross-Sectional	HADS-A	cg15115787	298	0.01	0.1529	0.2334	0.0467	0.33835	OpenSea	chr5:142730701
		Cognition	PACC	Cross-Sectional	HADS-A	cg12888360	298	0.0251	0.1924	0.19071	0.0335	0.21819	OpenSea	chr5:142732502
		Cognition	PACC	Cross-Sectional	HADS-A	cg18484679	298	0.5599	0.8409	0.85401	0.0155	0.16305	OpenSea	chr5:142740314
		Cognition	PACC	Cross-Sectional	HADS-A	cg16586394	298	0.9299	0.9986	0.90913	0.01422	0.19939	OpenSea	chr5:142757011
		Cognition	PACC	Cross-Sectional	HADS-A	cg25535999	298	0.5178	0.794	0.89419	0.01191	0.0902	OpenSea	chr5:142757312
		Cognition	PACC	Cross-Sectional	HADS-A	cg03746860	298	0.1434	0.5276	0.89502	0.01114	0.14119	OpenSea	chr5:142759375
		Cognition	PACC	Cross-Sectional	HADS-A	cg20598211	298	0.0641	0.3731	0.91627	0.01158	0.20941	OpenSea	chr5:142762454
		Cognition	PACC	Cross-Sectional	HADS-A	cg05483455	298	0.188	0.5593	0.92855	0.00637	0.07369	OpenSea	chr5:142762613
		Cognition	PACC	Cross-Sectional	HADS-A	cg16594263	298	0.8963	0.9986	0.91923	0.01644	0.42455	OpenSea	chr5:142768048
		Cognition	PACC	Cross-Sectional	HADS-A	cg16535116	298	0.6363	0.8697	0.82395	0.0209	0.17773	OpenSea	chr5:142769612
		Cognition	PACC	Cross-Sectional	HADS-A	cg05900547	298	0.2717	0.6755	0.82362	0.01868	0.15468	OpenSea	chr5:142769791
		Cognition	PACC	Cross-Sectional	HADS-A	cg19432243	298	0.4362	0.794	0.75237	0.06043	0.89556	OpenSea	chr5:142770757
		Cognition	PACC	Cross-Sectional	HADS-A	cg19820298	298	0.1849	0.5593	0.78285	0.05639	0.30689	OpenSea	chr5:142770782
		Cognition	PACC	Cross-Sectional	HADS-A	cg27107893	298	0.0373	0.2454	0.79309	0.09578	0.9445	OpenSea	chr5:142776274
		Cognition	PACC	Cross-Sectional	HADS-A	cg17342132	298	0.4442	0.794	0.86999	0.03297	0.31216	N_Shore	chr5:142780254
		Cognition	PACC	Cross-Sectional	HADS-A	cg07742588	298	0.0982	0.4325	0.78914	0.05595	0.91885	N_Shore	chr5:142780439
		Cognition	PACC	Cross-Sectional	HADS-A	cg00294552	298	0.0089	0.1529	0.84207	0.02221	0.20462	N_Shore	chr5:142780486
		Cognition	PACC	Cross-Sectional	HADS-A	cg16219186	298	0.8623	0.9986	0.88479	0.02148	0.22312	N_Shore	chr5:142780531
		Cognition	PACC	Cross-Sectional	HADS-A	cg08845721	298	0.4818	0.794	0.90291	0.02257	0.35006	N_Shore	chr5:142780693
		Cognition	PACC	Cross-Sectional	HADS-A	cg12969488	298	0.5159	0.794	0.6959	0.03946	0.36342	N_Shore	chr5:142780984
		Cognition	PACC	Cross-Sectional	HADS-A	cg07733851	298	0.1063	0.4325	0.31012	0.05444	0.48866	N_Shore	chr5:142781498
		Cognition	PACC	Cross-Sectional	HADS-A	cg27122725	298	0.966	0.9986	0.08247	0.03649	0.61758	N_Shore	chr5:142781723
		Cognition	PACC	Cross-Sectional	HADS-A	cg06952416	298	0.1877	0.5593	0.10317	0.01595	0.14679	N_Shore	chr5:142781736
		Cognition	PACC	Cross-Sectional	HADS-A	cg15910486	298	0.9566	0.9986	0.06987	0.01223	0.07877	Island	chr5:142783621
		Cognition	PACC	Cross-Sectional	HADS-A	cg01967637	298	0.4386	0.794	0.05849	0.01419	0.08687	Island	chr5:142784019
		Cognition	PACC	Cross-Sectional	HADS-A	cg26464411	298	0.1885	0.5593	0.0622	0.01192	0.08127	Island	chr5:142784222
		Cognition	PACC	Cross-Sectional	HADS-A	cg06968181	298	0.095	0.4325	0.05291	0.02403	0.66787	Island	chr5:142784323
		Cognition	PACC	Cross-Sectional	HADS-A	cg21702128	298	0.4954	0.794	0.08227	0.00965	0.07742	Island	chr5:142784721
		Cognition	PACC	Cross-Sectional	HADS-A	cg18718518	298	0.6157	0.8583	0.53255	0.05217	0.3892	S_Shore	chr5:142785455
		Cognition	PACC	Cross-Sectional	HADS-A	cg13764763	298	0.7435	0.9121	0.85356	0.05856	0.5219	S_Shore	chr5:142785501
		Cognition	PACC	Cross-Sectional	HADS-A	cg16224829	298	0.9992	0.9992	0.79156	0.03531	0.28375	OpenSea	chr5:142792698
		Cognition	PACC	Cross-Sectional	HADS-A	cg01751279	298	0.0183	0.1708	0.83882	0.03986	0.35649	OpenSea	chr5:142793924
		Cognition	PACC	Cross-Sectional	HADS-A	cg23430507	298	0.3087	0.7099	0.67871	0.03655	0.31636	OpenSea	chr5:142798375
		Cognition	PACC	Cross-Sectional	HADS-A	cg17349736	298	0.4113	0.794	0.8687	0.01502	0.1392	OpenSea	chr5:142802329
		Cognition	PACC	Cross-Sectional	HADS-A	cg14438279	298	0.0218	0.1819	0.80706	0.05892	0.46785	OpenSea	chr5:142806343
		Cognition	PACC	Cross-Sectional	HADS-A	cg08423118	298	0.9584	0.9986	0.77492	0.07191	0.32112	OpenSea	chr5:142808610
		Cognition	PACC	Cross-Sectional	HADS-A	cg23776787	298	0.6031	0.8583	0.05181	0.01906	0.42487	OpenSea	chr5:142814315
		Cognition	PACC	Cross-Sectional	HADS-A	cg03906910	298	0.0828	0.4233	0.22081	0.05239	0.37839	OpenSea	chr5:142814388
		Cognition	PACC	Cross-Sectional	HADS-A	cg07589972	298	0.9632	0.9986	0.90005	0.01417	0.2547	OpenSea	chr5:142815463
		Cognition	PACC	Cross-Sectional	HADS-A	cg12466613	298	0.1079	0.4325	0.91748	0.01192	0.24478	OpenSea	chr5:142815469
		Cognition	PACC	Cross-Sectional	HADS-A	cg21979215	298	0.5824	0.8505	0.76917	0.06877	0.39558	OpenSea	chr5:142815807
		Cognition	PACC	Cross-Sectional	HADS-A	cg11022710	298	0.422	0.794	0.90751	0.01966	0.20763	OpenSea	chr5:142820479
		Cognition	PACC	Longitudinal	HADS-A	cg23650353	268	0.6719	0.9601	0.92108	0.028	0.43394	OpenSea	chr4:148993643
		Cognition	PACC	Longitudinal	HADS-A	cg19491599	268	0.6993	0.9601	0.84529	0.0161	0.20857	OpenSea	chr4:149000607
		Cognition	PACC	Longitudinal	HADS-A	cg10207656	268	0.3577	0.9601	0.90855	0.01373	0.20071	OpenSea	chr4:149019526
		Cognition	PACC	Longitudinal	HADS-A	cg09143276	268	0.8959	0.9812	0.80845	0.02074	0.13091	OpenSea	chr4:149066518
		Cognition	PACC	Longitudinal	HADS-A	cg13000004	268	0.8186	0.9601	0.86983	0.01161	0.09813	OpenSea	chr4:149074093
		Cognition	PACC	Longitudinal	HADS-A	cg10590842	268	0.6214	0.9601	0.9034	0.01143	0.10122	OpenSea	chr4:149083955
		Cognition	PACC	Longitudinal	HADS-A	cg21701890	268	0.9902	0.9905	0.61622	0.02898	0.23369	OpenSea	chr4:149094632
		Cognition	PACC	Longitudinal	HADS-A	cg27234800	268	0.4574	0.9601	0.89127	0.0525	0.39493	OpenSea	chr4:149116611
		Cognition	PACC	Longitudinal	HADS-A	cg25672354	268	0.348	0.9601	0.86697	0.01933	0.23574	OpenSea	chr4:149122383
		Cognition	PACC	Longitudinal	HADS-A	cg10993059	268	0.739	0.9601	0.892	0.014	0.24786	OpenSea	chr4:149123062
		Cognition	PACC	Longitudinal	HADS-A	cg07335874	268	0.93	0.9905	0.89734	0.01678	0.25463	OpenSea	chr4:149136507
		Cognition	PACC	Longitudinal	HADS-A	cg08264907	268	0.1976	0.9601	0.90365	0.00834	0.08404	OpenSea	chr4:149144045
		Cognition	PACC	Longitudinal	HADS-A	cg07275757	268	0.6817	0.9601	0.89578	0.01331	0.13086	OpenSea	chr4:149189974
		Cognition	PACC	Longitudinal	HADS-A	cg13157799	268	0.5407	0.9601	0.05908	0.01227	0.14832	OpenSea	chr4:149191991
		Cognition	PACC	Longitudinal	HADS-A	cg00328411	268	0.9348	0.9905	0.90656	0.00839	0.10838	OpenSea	chr4:149205617
		Cognition	PACC	Longitudinal	HADS-A	cg02471166	268	0.5885	0.9601	0.62905	0.02431	0.28086	OpenSea	chr4:149244985
		Cognition	PACC	Longitudinal	HADS-A	cg27225476	268	0.9679	0.9905	0.85878	0.01502	0.11725	OpenSea	chr4:149275542
		Cognition	PACC	Longitudinal	HADS-A	cg06240648	268	0.8845	0.9804	0.90857	0.00875	0.08216	OpenSea	chr4:149289762
		Cognition	PACC	Longitudinal	HADS-A	cg04867484	268	0.2475	0.9601	0.06179	0.03171	0.6046	OpenSea	chr4:149297469
		Cognition	PACC	Longitudinal	HADS-A	cg19496136	268	0.7206	0.9601	0.74636	0.06158	0.84904	OpenSea	chr4:149336765
		Cognition	PACC	Longitudinal	HADS-A	cg17253842	268	0.1577	0.9601	0.87057	0.02004	0.40157	OpenSea	chr4:149347991
		Cognition	PACC	Longitudinal	HADS-A	cg19650300	268	0.9896	0.9905	0.87161	0.0124	0.12937	OpenSea	chr4:149357960
		Cognition	PACC	Longitudinal	HADS-A	cg09238384	268	0.5929	0.9601	0.88033	0.01059	0.10479	OpenSea	chr4:149358199
		Cognition	PACC	Longitudinal	HADS-A	cg07651033	268	0.283	0.9601	0.891	0.01412	0.08448	OpenSea	chr4:149359043
		Cognition	PACC	Longitudinal	HADS-A	cg23329208	268	0.5428	0.9601	0.89218	0.01003	0.08891	N_Shelf	chr4:149360981
		Cognition	PACC	Longitudinal	HADS-A	cg05437692	268	0.5342	0.9601	0.28837	0.04393	0.32226	N_Shore	chr4:149362435
		Cognition	PACC	Longitudinal	HADS-A	cg27460943	268	0.9905	0.9905	0.08292	0.02603	0.31306	N_Shore	chr4:149362809
		Cognition	PACC	Longitudinal	HADS-A	cg01576854	268	0.143	0.9601	0.07386	0.01207	0.20464	Island	chr4:149363450
		Cognition	PACC	Longitudinal	HADS-A	cg13996731	268	0.1228	0.9601	0.05943	0.00984	0.12921	Island	chr4:149363522
		Cognition	PACC	Longitudinal	HADS-A	cg20140452	268	0.8271	0.9601	0.07045	0.00971	0.0619	Island	chr4:149363715
		Cognition	PACC	Longitudinal	HADS-A	cg10621979	268	0.0046	0.4245	0.05355	0.018	0.29521	Island	chr4:149365824
		Cognition	PACC	Longitudinal	HADS-A	cg11239219	268	0.2085	0.9601	0.05479	0.02153	0.3658	Island	chr4:149365887
		Cognition	PACC	Longitudinal	HADS-A	cg10002915	268	0.1473	0.9601	0.54242	0.08455	0.73095	S_Shelf	chr4:149369175
		Cognition	PACC	Longitudinal	HADS-A	cg15374100	268	0.3687	0.9601	0.86961	0.01354	0.2065	OpenSea	chr5:142651239
		Cognition	PACC	Longitudinal	HADS-A	cg15740681	268	0.494	0.9601	0.89095	0.00925	0.09622	OpenSea	chr5:142653066
		Cognition	PACC	Longitudinal	HADS-A	cg26081259	268	0.466	0.9601	0.92585	0.00714	0.05144	OpenSea	chr5:142659682
		Cognition	PACC	Longitudinal	HADS-A	cg13514002	268	0.5162	0.9601	0.9104	0.01216	0.16497	OpenSea	chr5:142677292
		Cognition	PACC	Longitudinal	HADS-A	cg24801588	268	0.389	0.9601	0.87613	0.01121	0.08119	OpenSea	chr5:142689858
		Cognition	PACC	Longitudinal	HADS-A	cg00407401	268	0.3209	0.9601	0.88336	0.0113	0.12225	OpenSea	chr5:142690959
		Cognition	PACC	Longitudinal	HADS-A	cg19457823	268	0.1482	0.9601	0.85324	0.04572	0.44993	OpenSea	chr5:142692961
		Cognition	PACC	Longitudinal	HADS-A	cg12741214	268	0.8022	0.9601	0.92153	0.00739	0.05446	OpenSea	chr5:142695619
		Cognition	PACC	Longitudinal	HADS-A	cg04457787	268	0.104	0.9601	0.91851	0.00864	0.10367	OpenSea	chr5:142695636
		Cognition	PACC	Longitudinal	HADS-A	cg20728768	268	0.472	0.9601	0.28495	0.05593	0.42144	OpenSea	chr5:142696594
		Cognition	PACC	Longitudinal	HADS-A	cg25708981	268	0.1029	0.9601	0.81142	0.04619	0.93615	OpenSea	chr5:142697868
		Cognition	PACC	Longitudinal	HADS-A	cg19645279	268	0.9457	0.9905	0.50627	0.03156	0.23017	OpenSea	chr5:142702733
		Cognition	PACC	Longitudinal	HADS-A	cg19176661	268	0.2545	0.9601	0.90339	0.00908	0.09406	OpenSea	chr5:142718549
		Cognition	PACC	Longitudinal	HADS-A	cg07715663	268	0.4537	0.9601	0.89993	0.0077	0.06068	OpenSea	chr5:142721796
		Cognition	PACC	Longitudinal	HADS-A	cg24052866	268	0.7873	0.9601	0.69336	0.03805	0.44354	OpenSea	chr5:142727470
		Cognition	PACC	Longitudinal	HADS-A	cg22233604	268	0.5023	0.9601	0.80239	0.02828	0.34628	OpenSea	chr5:142729377
		Cognition	PACC	Longitudinal	HADS-A	cg03857453	268	0.2463	0.9601	0.71757	0.04588	0.42058	OpenSea	chr5:142729913
		Cognition	PACC	Longitudinal	HADS-A	cg15115787	268	0.7797	0.9601	0.2334	0.0467	0.33835	OpenSea	chr5:142730701
		Cognition	PACC	Longitudinal	HADS-A	cg12888360	268	0.9586	0.9905	0.19071	0.0335	0.21819	OpenSea	chr5:142732502
		Cognition	PACC	Longitudinal	HADS-A	cg18484679	268	0.6768	0.9601	0.85401	0.0155	0.16305	OpenSea	chr5:142740314
		Cognition	PACC	Longitudinal	HADS-A	cg16586394	268	0.8572	0.9618	0.90913	0.01422	0.19939	OpenSea	chr5:142757011
		Cognition	PACC	Longitudinal	HADS-A	cg25535999	268	0.4849	0.9601	0.89419	0.01191	0.0902	OpenSea	chr5:142757312
		Cognition	PACC	Longitudinal	HADS-A	cg03746860	268	0.1589	0.9601	0.89502	0.01114	0.14119	OpenSea	chr5:142759375
		Cognition	PACC	Longitudinal	HADS-A	cg20598211	268	0.3671	0.9601	0.91627	0.01158	0.20941	OpenSea	chr5:142762454
		Cognition	PACC	Longitudinal	HADS-A	cg05483455	268	0.8453	0.9601	0.92855	0.00637	0.07369	OpenSea	chr5:142762613
		Cognition	PACC	Longitudinal	HADS-A	cg16594263	268	0.5637	0.9601	0.91923	0.01644	0.42455	OpenSea	chr5:142768048
		Cognition	PACC	Longitudinal	HADS-A	cg16535116	268	0.0783	0.9601	0.82395	0.0209	0.17773	OpenSea	chr5:142769612
		Cognition	PACC	Longitudinal	HADS-A	cg05900547	268	0.6285	0.9601	0.82362	0.01868	0.15468	OpenSea	chr5:142769791
		Cognition	PACC	Longitudinal	HADS-A	cg19432243	268	0.1216	0.9601	0.75237	0.06043	0.89556	OpenSea	chr5:142770757
		Cognition	PACC	Longitudinal	HADS-A	cg19820298	268	0.2408	0.9601	0.78285	0.05639	0.30689	OpenSea	chr5:142770782
		Cognition	PACC	Longitudinal	HADS-A	cg27107893	268	0.7726	0.9601	0.79309	0.09578	0.9445	OpenSea	chr5:142776274
		Cognition	PACC	Longitudinal	HADS-A	cg17342132	268	0.559	0.9601	0.86999	0.03297	0.31216	N_Shore	chr5:142780254
		Cognition	PACC	Longitudinal	HADS-A	cg07742588	268	0.7007	0.9601	0.78914	0.05595	0.91885	N_Shore	chr5:142780439
		Cognition	PACC	Longitudinal	HADS-A	cg00294552	268	0.5469	0.9601	0.84207	0.02221	0.20462	N_Shore	chr5:142780486
		Cognition	PACC	Longitudinal	HADS-A	cg16219186	268	0.2955	0.9601	0.88479	0.02148	0.22312	N_Shore	chr5:142780531
		Cognition	PACC	Longitudinal	HADS-A	cg08845721	268	0.6926	0.9601	0.90291	0.02257	0.35006	N_Shore	chr5:142780693
		Cognition	PACC	Longitudinal	HADS-A	cg12969488	268	0.7118	0.9601	0.6959	0.03946	0.36342	N_Shore	chr5:142780984
		Cognition	PACC	Longitudinal	HADS-A	cg07733851	268	0.0892	0.9601	0.31012	0.05444	0.48866	N_Shore	chr5:142781498
		Cognition	PACC	Longitudinal	HADS-A	cg27122725	268	0.3086	0.9601	0.08247	0.03649	0.61758	N_Shore	chr5:142781723
		Cognition	PACC	Longitudinal	HADS-A	cg06952416	268	0.4034	0.9601	0.10317	0.01595	0.14679	N_Shore	chr5:142781736
		Cognition	PACC	Longitudinal	HADS-A	cg15910486	268	0.7693	0.9601	0.06987	0.01223	0.07877	Island	chr5:142783621
		Cognition	PACC	Longitudinal	HADS-A	cg01967637	268	0.4525	0.9601	0.05849	0.01419	0.08687	Island	chr5:142784019
		Cognition	PACC	Longitudinal	HADS-A	cg26464411	268	0.6293	0.9601	0.0622	0.01192	0.08127	Island	chr5:142784222
		Cognition	PACC	Longitudinal	HADS-A	cg06968181	268	0.1527	0.9601	0.05291	0.02403	0.66787	Island	chr5:142784323
		Cognition	PACC	Longitudinal	HADS-A	cg21702128	268	0.38	0.9601	0.08227	0.00965	0.07742	Island	chr5:142784721
		Cognition	PACC	Longitudinal	HADS-A	cg18718518	268	0.7997	0.9601	0.53255	0.05217	0.3892	S_Shore	chr5:142785455
		Cognition	PACC	Longitudinal	HADS-A	cg13764763	268	0.7874	0.9601	0.85356	0.05856	0.5219	S_Shore	chr5:142785501
		Cognition	PACC	Longitudinal	HADS-A	cg16224829	268	0.7868	0.9601	0.79156	0.03531	0.28375	OpenSea	chr5:142792698
		Cognition	PACC	Longitudinal	HADS-A	cg01751279	268	0.5459	0.9601	0.83882	0.03986	0.35649	OpenSea	chr5:142793924
		Cognition	PACC	Longitudinal	HADS-A	cg23430507	268	0.8452	0.9601	0.67871	0.03655	0.31636	OpenSea	chr5:142798375
		Cognition	PACC	Longitudinal	HADS-A	cg17349736	268	0.4817	0.9601	0.8687	0.01502	0.1392	OpenSea	chr5:142802329
		Cognition	PACC	Longitudinal	HADS-A	cg14438279	268	0.7521	0.9601	0.80706	0.05892	0.46785	OpenSea	chr5:142806343
		Cognition	PACC	Longitudinal	HADS-A	cg08423118	268	0.5572	0.9601	0.77492	0.07191	0.32112	OpenSea	chr5:142808610
		Cognition	PACC	Longitudinal	HADS-A	cg23776787	268	0.1955	0.9601	0.05181	0.01906	0.42487	OpenSea	chr5:142814315
		Cognition	PACC	Longitudinal	HADS-A	cg03906910	268	0.1246	0.9601	0.22081	0.05239	0.37839	OpenSea	chr5:142814388
		Cognition	PACC	Longitudinal	HADS-A	cg07589972	268	0.392	0.9601	0.90005	0.01417	0.2547	OpenSea	chr5:142815463
		Cognition	PACC	Longitudinal	HADS-A	cg12466613	268	0.8233	0.9601	0.91748	0.01192	0.24478	OpenSea	chr5:142815469
		Cognition	PACC	Longitudinal	HADS-A	cg21979215	268	0.5129	0.9601	0.76917	0.06877	0.39558	OpenSea	chr5:142815807
		Cognition	PACC	Longitudinal	HADS-A	cg11022710	268	0.1056	0.9601	0.90751	0.01966	0.20763	OpenSea	chr5:142820479
		Cognition	PACC	Cross-Sectional	HADS-D	cg23650353	298	0.0496	0.4816	0.92108	0.028	0.43394	OpenSea	chr4:148993643
		Cognition	PACC	Cross-Sectional	HADS-D	cg19491599	298	0.3852	0.7311	0.84529	0.0161	0.20857	OpenSea	chr4:149000607
		Cognition	PACC	Cross-Sectional	HADS-D	cg10207656	298	0.0766	0.4816	0.90855	0.01373	0.20071	OpenSea	chr4:149019526
		Cognition	PACC	Cross-Sectional	HADS-D	cg09143276	298	0.4196	0.7311	0.80845	0.02074	0.13091	OpenSea	chr4:149066518
		Cognition	PACC	Cross-Sectional	HADS-D	cg13000004	298	0.1353	0.5312	0.86983	0.01161	0.09813	OpenSea	chr4:149074093
		Cognition	PACC	Cross-Sectional	HADS-D	cg10590842	298	0.029	0.4169	0.9034	0.01143	0.10122	OpenSea	chr4:149083955
		Cognition	PACC	Cross-Sectional	HADS-D	cg21701890	298	0.2082	0.5923	0.61622	0.02898	0.23369	OpenSea	chr4:149094632
		Cognition	PACC	Cross-Sectional	HADS-D	cg27234800	298	0.5448	0.7311	0.89127	0.0525	0.39493	OpenSea	chr4:149116611
		Cognition	PACC	Cross-Sectional	HADS-D	cg25672354	298	0.4339	0.7311	0.86697	0.01933	0.23574	OpenSea	chr4:149122383
		Cognition	PACC	Cross-Sectional	HADS-D	cg10993059	298	0.5089	0.7311	0.892	0.014	0.24786	OpenSea	chr4:149123062
		Cognition	PACC	Cross-Sectional	HADS-D	cg07335874	298	0.6204	0.7676	0.89734	0.01678	0.25463	OpenSea	chr4:149136507
		Cognition	PACC	Cross-Sectional	HADS-D	cg08264907	298	0.8135	0.891	0.90365	0.00834	0.08404	OpenSea	chr4:149144045
		Cognition	PACC	Cross-Sectional	HADS-D	cg07275757	298	0.3682	0.7311	0.89578	0.01331	0.13086	OpenSea	chr4:149189974
		Cognition	PACC	Cross-Sectional	HADS-D	cg13157799	298	0.5352	0.7311	0.05908	0.01227	0.14832	OpenSea	chr4:149191991
		Cognition	PACC	Cross-Sectional	HADS-D	cg00328411	298	0.5228	0.7311	0.90656	0.00839	0.10838	OpenSea	chr4:149205617
		Cognition	PACC	Cross-Sectional	HADS-D	cg02471166	298	0.3386	0.7311	0.62905	0.02431	0.28086	OpenSea	chr4:149244985
		Cognition	PACC	Cross-Sectional	HADS-D	cg27225476	298	0.5092	0.7311	0.85878	0.01502	0.11725	OpenSea	chr4:149275542
		Cognition	PACC	Cross-Sectional	HADS-D	cg06240648	298	0.6635	0.7927	0.90857	0.00875	0.08216	OpenSea	chr4:149289762
		Cognition	PACC	Cross-Sectional	HADS-D	cg04867484	298	0.0761	0.4816	0.06179	0.03171	0.6046	OpenSea	chr4:149297469
		Cognition	PACC	Cross-Sectional	HADS-D	cg19496136	298	0.0785	0.4816	0.74636	0.06158	0.84904	OpenSea	chr4:149336765
		Cognition	PACC	Cross-Sectional	HADS-D	cg17253842	298	0.9019	0.9323	0.87057	0.02004	0.40157	OpenSea	chr4:149347991
		Cognition	PACC	Cross-Sectional	HADS-D	cg19650300	298	0.5172	0.7311	0.87161	0.0124	0.12937	OpenSea	chr4:149357960
		Cognition	PACC	Cross-Sectional	HADS-D	cg09238384	298	0.1647	0.5789	0.88033	0.01059	0.10479	OpenSea	chr4:149358199
		Cognition	PACC	Cross-Sectional	HADS-D	cg07651033	298	0.1164	0.5312	0.891	0.01412	0.08448	OpenSea	chr4:149359043
		Cognition	PACC	Cross-Sectional	HADS-D	cg23329208	298	0.1334	0.5312	0.89218	0.01003	0.08891	N_Shelf	chr4:149360981
		Cognition	PACC	Cross-Sectional	HADS-D	cg05437692	298	0.5765	0.7471	0.28837	0.04393	0.32226	N_Shore	chr4:149362435
		Cognition	PACC	Cross-Sectional	HADS-D	cg27460943	298	0.098	0.5305	0.08292	0.02603	0.31306	N_Shore	chr4:149362809
		Cognition	PACC	Cross-Sectional	HADS-D	cg01576854	298	0.1444	0.5312	0.07386	0.01207	0.20464	Island	chr4:149363450
		Cognition	PACC	Cross-Sectional	HADS-D	cg13996731	298	0.3175	0.7311	0.05943	0.00984	0.12921	Island	chr4:149363522
		Cognition	PACC	Cross-Sectional	HADS-D	cg20140452	298	0.419	0.7311	0.07045	0.00971	0.0619	Island	chr4:149363715
		Cognition	PACC	Cross-Sectional	HADS-D	cg10621979	298	0.5483	0.7311	0.05355	0.018	0.29521	Island	chr4:149365824
		Cognition	PACC	Cross-Sectional	HADS-D	cg11239219	298	0.1827	0.5789	0.05479	0.02153	0.3658	Island	chr4:149365887
		Cognition	PACC	Cross-Sectional	HADS-D	cg10002915	298	0.4447	0.7311	0.54242	0.08455	0.73095	S_Shelf	chr4:149369175
		Cognition	PACC	Cross-Sectional	HADS-D	cg15374100	298	0.6258	0.7676	0.86961	0.01354	0.2065	OpenSea	chr5:142651239
		Cognition	PACC	Cross-Sectional	HADS-D	cg15740681	298	0.0657	0.4816	0.89095	0.00925	0.09622	OpenSea	chr5:142653066
		Cognition	PACC	Cross-Sectional	HADS-D	cg26081259	298	0.6437	0.7793	0.92585	0.00714	0.05144	OpenSea	chr5:142659682
		Cognition	PACC	Cross-Sectional	HADS-D	cg13514002	298	0.524	0.7311	0.9104	0.01216	0.16497	OpenSea	chr5:142677292
		Cognition	PACC	Cross-Sectional	HADS-D	cg24801588	298	0.062	0.4816	0.87613	0.01121	0.08119	OpenSea	chr5:142689858
		Cognition	PACC	Cross-Sectional	HADS-D	cg00407401	298	0.38	0.7311	0.88336	0.0113	0.12225	OpenSea	chr5:142690959
		Cognition	PACC	Cross-Sectional	HADS-D	cg19457823	298	0.393	0.7311	0.85324	0.04572	0.44993	OpenSea	chr5:142692961
		Cognition	PACC	Cross-Sectional	HADS-D	cg12741214	298	0.8943	0.9323	0.92153	0.00739	0.05446	OpenSea	chr5:142695619
		Cognition	PACC	Cross-Sectional	HADS-D	cg04457787	298	0.4292	0.7311	0.91851	0.00864	0.10367	OpenSea	chr5:142695636
		Cognition	PACC	Cross-Sectional	HADS-D	cg20728768	298	0.6235	0.7676	0.28495	0.05593	0.42144	OpenSea	chr5:142696594
		Cognition	PACC	Cross-Sectional	HADS-D	cg25708981	298	0.7424	0.8432	0.81142	0.04619	0.93615	OpenSea	chr5:142697868
		Cognition	PACC	Cross-Sectional	HADS-D	cg19645279	298	0.8776	0.9323	0.50627	0.03156	0.23017	OpenSea	chr5:142702733
		Cognition	PACC	Cross-Sectional	HADS-D	cg19176661	298	0.1195	0.5312	0.90339	0.00908	0.09406	OpenSea	chr5:142718549
		Cognition	PACC	Cross-Sectional	HADS-D	cg07715663	298	0.9415	0.9624	0.89993	0.0077	0.06068	OpenSea	chr5:142721796
		Cognition	PACC	Cross-Sectional	HADS-D	cg24052866	298	0.4976	0.7311	0.69336	0.03805	0.44354	OpenSea	chr5:142727470
		Cognition	PACC	Cross-Sectional	HADS-D	cg22233604	298	0.1922	0.5789	0.80239	0.02828	0.34628	OpenSea	chr5:142729377
		Cognition	PACC	Cross-Sectional	HADS-D	cg03857453	298	0.0317	0.4169	0.71757	0.04588	0.42058	OpenSea	chr5:142729913
		Cognition	PACC	Cross-Sectional	HADS-D	cg15115787	298	0.7929	0.8789	0.2334	0.0467	0.33835	OpenSea	chr5:142730701
		Cognition	PACC	Cross-Sectional	HADS-D	cg12888360	298	0.4582	0.7311	0.19071	0.0335	0.21819	OpenSea	chr5:142732502
		Cognition	PACC	Cross-Sectional	HADS-D	cg18484679	298	0.8662	0.9323	0.85401	0.0155	0.16305	OpenSea	chr5:142740314
		Cognition	PACC	Cross-Sectional	HADS-D	cg16586394	298	0.5707	0.7471	0.90913	0.01422	0.19939	OpenSea	chr5:142757011
		Cognition	PACC	Cross-Sectional	HADS-D	cg25535999	298	0.4647	0.7311	0.89419	0.01191	0.0902	OpenSea	chr5:142757312
		Cognition	PACC	Cross-Sectional	HADS-D	cg03746860	298	0.0089	0.1645	0.89502	0.01114	0.14119	OpenSea	chr5:142759375
		Cognition	PACC	Cross-Sectional	HADS-D	cg20598211	298	0.6104	0.7676	0.91627	0.01158	0.20941	OpenSea	chr5:142762454
		Cognition	PACC	Cross-Sectional	HADS-D	cg05483455	298	0.9839	0.9874	0.92855	0.00637	0.07369	OpenSea	chr5:142762613
		Cognition	PACC	Cross-Sectional	HADS-D	cg16594263	298	0.0089	0.1645	0.91923	0.01644	0.42455	OpenSea	chr5:142768048
		Cognition	PACC	Cross-Sectional	HADS-D	cg16535116	298	0.1951	0.5789	0.82395	0.0209	0.17773	OpenSea	chr5:142769612
		Cognition	PACC	Cross-Sectional	HADS-D	cg05900547	298	0.098	0.5305	0.82362	0.01868	0.15468	OpenSea	chr5:142769791
		Cognition	PACC	Cross-Sectional	HADS-D	cg19432243	298	0.4711	0.7311	0.75237	0.06043	0.89556	OpenSea	chr5:142770757
		Cognition	PACC	Cross-Sectional	HADS-D	cg19820298	298	0.6895	0.8133	0.78285	0.05639	0.30689	OpenSea	chr5:142770782
		Cognition	PACC	Cross-Sectional	HADS-D	cg27107893	298	0.3213	0.7311	0.79309	0.09578	0.9445	OpenSea	chr5:142776274
		Cognition	PACC	Cross-Sectional	HADS-D	cg17342132	298	0.7147	0.8324	0.86999	0.03297	0.31216	N_Shore	chr5:142780254
		Cognition	PACC	Cross-Sectional	HADS-D	cg07742588	298	0.1322	0.5312	0.78914	0.05595	0.91885	N_Shore	chr5:142780439
		Cognition	PACC	Cross-Sectional	HADS-D	cg00294552	298	0.0737	0.4816	0.84207	0.02221	0.20462	N_Shore	chr5:142780486
		Cognition	PACC	Cross-Sectional	HADS-D	cg16219186	298	0.0657	0.4816	0.88479	0.02148	0.22312	N_Shore	chr5:142780531
		Cognition	PACC	Cross-Sectional	HADS-D	cg08845721	298	0.2212	0.5925	0.90291	0.02257	0.35006	N_Shore	chr5:142780693
		Cognition	PACC	Cross-Sectional	HADS-D	cg12969488	298	0.9874	0.9874	0.6959	0.03946	0.36342	N_Shore	chr5:142780984
		Cognition	PACC	Cross-Sectional	HADS-D	cg07733851	298	0.8931	0.9323	0.31012	0.05444	0.48866	N_Shore	chr5:142781498
		Cognition	PACC	Cross-Sectional	HADS-D	cg27122725	298	0.7716	0.8657	0.08247	0.03649	0.61758	N_Shore	chr5:142781723
		Cognition	PACC	Cross-Sectional	HADS-D	cg06952416	298	0.4164	0.7311	0.10317	0.01595	0.14679	N_Shore	chr5:142781736
		Cognition	PACC	Cross-Sectional	HADS-D	cg15910486	298	0.2125	0.5923	0.06987	0.01223	0.07877	Island	chr5:142783621
		Cognition	PACC	Cross-Sectional	HADS-D	cg01967637	298	0.5292	0.7311	0.05849	0.01419	0.08687	Island	chr5:142784019
		Cognition	PACC	Cross-Sectional	HADS-D	cg26464411	298	0.4191	0.7311	0.0622	0.01192	0.08127	Island	chr5:142784222
		Cognition	PACC	Cross-Sectional	HADS-D	cg06968181	298	0.1789	0.5789	0.05291	0.02403	0.66787	Island	chr5:142784323
		Cognition	PACC	Cross-Sectional	HADS-D	cg21702128	298	0.2933	0.7311	0.08227	0.00965	0.07742	Island	chr5:142784721
		Cognition	PACC	Cross-Sectional	HADS-D	cg18718518	298	0.1261	0.5312	0.53255	0.05217	0.3892	S_Shore	chr5:142785455
		Cognition	PACC	Cross-Sectional	HADS-D	cg13764763	298	0.2254	0.5925	0.85356	0.05856	0.5219	S_Shore	chr5:142785501
		Cognition	PACC	Cross-Sectional	HADS-D	cg16224829	298	0.1709	0.5789	0.79156	0.03531	0.28375	OpenSea	chr5:142792698
		Cognition	PACC	Cross-Sectional	HADS-D	cg01751279	298	0.3726	0.7311	0.83882	0.03986	0.35649	OpenSea	chr5:142793924
		Cognition	PACC	Cross-Sectional	HADS-D	cg23430507	298	0.5297	0.7311	0.67871	0.03655	0.31636	OpenSea	chr5:142798375
		Cognition	PACC	Cross-Sectional	HADS-D	cg17349736	298	0.4902	0.7311	0.8687	0.01502	0.1392	OpenSea	chr5:142802329
		Cognition	PACC	Cross-Sectional	HADS-D	cg14438279	298	0.0054	0.1645	0.80706	0.05892	0.46785	OpenSea	chr5:142806343
		Cognition	PACC	Cross-Sectional	HADS-D	cg08423118	298	0.0022	0.1645	0.77492	0.07191	0.32112	OpenSea	chr5:142808610
		Cognition	PACC	Cross-Sectional	HADS-D	cg23776787	298	0.1437	0.5312	0.05181	0.01906	0.42487	OpenSea	chr5:142814315
		Cognition	PACC	Cross-Sectional	HADS-D	cg03906910	298	0.0044	0.1645	0.22081	0.05239	0.37839	OpenSea	chr5:142814388
		Cognition	PACC	Cross-Sectional	HADS-D	cg07589972	298	0.5211	0.7311	0.90005	0.01417	0.2547	OpenSea	chr5:142815463
		Cognition	PACC	Cross-Sectional	HADS-D	cg12466613	298	0.3974	0.7311	0.91748	0.01192	0.24478	OpenSea	chr5:142815469
		Cognition	PACC	Cross-Sectional	HADS-D	cg21979215	298	0.7335	0.8432	0.76917	0.06877	0.39558	OpenSea	chr5:142815807
		Cognition	PACC	Cross-Sectional	HADS-D	cg11022710	298	0.3954	0.7311	0.90751	0.01966	0.20763	OpenSea	chr5:142820479
		Cognition	PACC	Longitudinal	HADS-D	cg23650353	268	0.8865	0.9756	0.92108	0.028	0.43394	OpenSea	chr4:148993643
		Cognition	PACC	Longitudinal	HADS-D	cg19491599	268	0.0928	0.9419	0.84529	0.0161	0.20857	OpenSea	chr4:149000607
		Cognition	PACC	Longitudinal	HADS-D	cg10207656	268	0.9569	0.992	0.90855	0.01373	0.20071	OpenSea	chr4:149019526
		Cognition	PACC	Longitudinal	HADS-D	cg09143276	268	0.3906	0.9419	0.80845	0.02074	0.13091	OpenSea	chr4:149066518
		Cognition	PACC	Longitudinal	HADS-D	cg13000004	268	0.6516	0.9756	0.86983	0.01161	0.09813	OpenSea	chr4:149074093
		Cognition	PACC	Longitudinal	HADS-D	cg10590842	268	0.4378	0.9419	0.9034	0.01143	0.10122	OpenSea	chr4:149083955
		Cognition	PACC	Longitudinal	HADS-D	cg21701890	268	0.8057	0.9756	0.61622	0.02898	0.23369	OpenSea	chr4:149094632
		Cognition	PACC	Longitudinal	HADS-D	cg27234800	268	0.3662	0.9419	0.89127	0.0525	0.39493	OpenSea	chr4:149116611
		Cognition	PACC	Longitudinal	HADS-D	cg25672354	268	0.4241	0.9419	0.86697	0.01933	0.23574	OpenSea	chr4:149122383
		Cognition	PACC	Longitudinal	HADS-D	cg10993059	268	0.355	0.9419	0.892	0.014	0.24786	OpenSea	chr4:149123062
		Cognition	PACC	Longitudinal	HADS-D	cg07335874	268	0.4281	0.9419	0.89734	0.01678	0.25463	OpenSea	chr4:149136507
		Cognition	PACC	Longitudinal	HADS-D	cg08264907	268	0.8392	0.9756	0.90365	0.00834	0.08404	OpenSea	chr4:149144045
		Cognition	PACC	Longitudinal	HADS-D	cg07275757	268	0.0256	0.7856	0.89578	0.01331	0.13086	OpenSea	chr4:149189974
		Cognition	PACC	Longitudinal	HADS-D	cg13157799	268	0.2149	0.9419	0.05908	0.01227	0.14832	OpenSea	chr4:149191991
		Cognition	PACC	Longitudinal	HADS-D	cg00328411	268	0.5163	0.9535	0.90656	0.00839	0.10838	OpenSea	chr4:149205617
		Cognition	PACC	Longitudinal	HADS-D	cg02471166	268	0.8761	0.9756	0.62905	0.02431	0.28086	OpenSea	chr4:149244985
		Cognition	PACC	Longitudinal	HADS-D	cg27225476	268	0.4915	0.9535	0.85878	0.01502	0.11725	OpenSea	chr4:149275542
		Cognition	PACC	Longitudinal	HADS-D	cg06240648	268	0.7444	0.9756	0.90857	0.00875	0.08216	OpenSea	chr4:149289762
		Cognition	PACC	Longitudinal	HADS-D	cg04867484	268	0.5563	0.9535	0.06179	0.03171	0.6046	OpenSea	chr4:149297469
		Cognition	PACC	Longitudinal	HADS-D	cg19496136	268	0.9453	0.992	0.74636	0.06158	0.84904	OpenSea	chr4:149336765
		Cognition	PACC	Longitudinal	HADS-D	cg17253842	268	0.0723	0.9419	0.87057	0.02004	0.40157	OpenSea	chr4:149347991
		Cognition	PACC	Longitudinal	HADS-D	cg19650300	268	0.8998	0.9756	0.87161	0.0124	0.12937	OpenSea	chr4:149357960
		Cognition	PACC	Longitudinal	HADS-D	cg09238384	268	0.5928	0.9588	0.88033	0.01059	0.10479	OpenSea	chr4:149358199
		Cognition	PACC	Longitudinal	HADS-D	cg07651033	268	0.594	0.9588	0.891	0.01412	0.08448	OpenSea	chr4:149359043
		Cognition	PACC	Longitudinal	HADS-D	cg23329208	268	0.2251	0.9419	0.89218	0.01003	0.08891	N_Shelf	chr4:149360981
		Cognition	PACC	Longitudinal	HADS-D	cg05437692	268	0.3968	0.9419	0.28837	0.04393	0.32226	N_Shore	chr4:149362435
		Cognition	PACC	Longitudinal	HADS-D	cg27460943	268	0.8304	0.9756	0.08292	0.02603	0.31306	N_Shore	chr4:149362809
		Cognition	PACC	Longitudinal	HADS-D	cg01576854	268	0.2449	0.9419	0.07386	0.01207	0.20464	Island	chr4:149363450
		Cognition	PACC	Longitudinal	HADS-D	cg13996731	268	0.3162	0.9419	0.05943	0.00984	0.12921	Island	chr4:149363522
		Cognition	PACC	Longitudinal	HADS-D	cg20140452	268	0.6988	0.9756	0.07045	0.00971	0.0619	Island	chr4:149363715
		Cognition	PACC	Longitudinal	HADS-D	cg10621979	268	0.0136	0.626	0.05355	0.018	0.29521	Island	chr4:149365824
		Cognition	PACC	Longitudinal	HADS-D	cg11239219	268	0.1479	0.9419	0.05479	0.02153	0.3658	Island	chr4:149365887
		Cognition	PACC	Longitudinal	HADS-D	cg10002915	268	0.2992	0.9419	0.54242	0.08455	0.73095	S_Shelf	chr4:149369175
		Cognition	PACC	Longitudinal	HADS-D	cg15374100	268	0.7824	0.9756	0.86961	0.01354	0.2065	OpenSea	chr5:142651239
		Cognition	PACC	Longitudinal	HADS-D	cg15740681	268	0.6802	0.9756	0.89095	0.00925	0.09622	OpenSea	chr5:142653066
		Cognition	PACC	Longitudinal	HADS-D	cg26081259	268	0.7183	0.9756	0.92585	0.00714	0.05144	OpenSea	chr5:142659682
		Cognition	PACC	Longitudinal	HADS-D	cg13514002	268	0.8235	0.9756	0.9104	0.01216	0.16497	OpenSea	chr5:142677292
		Cognition	PACC	Longitudinal	HADS-D	cg24801588	268	0.9652	0.992	0.87613	0.01121	0.08119	OpenSea	chr5:142689858
		Cognition	PACC	Longitudinal	HADS-D	cg00407401	268	0.5227	0.9535	0.88336	0.0113	0.12225	OpenSea	chr5:142690959
		Cognition	PACC	Longitudinal	HADS-D	cg19457823	268	0.0028	0.2549	0.85324	0.04572	0.44993	OpenSea	chr5:142692961
		Cognition	PACC	Longitudinal	HADS-D	cg12741214	268	0.3407	0.9419	0.92153	0.00739	0.05446	OpenSea	chr5:142695619
		Cognition	PACC	Longitudinal	HADS-D	cg04457787	268	0.6674	0.9756	0.91851	0.00864	0.10367	OpenSea	chr5:142695636
		Cognition	PACC	Longitudinal	HADS-D	cg20728768	268	0.4947	0.9535	0.28495	0.05593	0.42144	OpenSea	chr5:142696594
		Cognition	PACC	Longitudinal	HADS-D	cg25708981	268	0.3799	0.9419	0.81142	0.04619	0.93615	OpenSea	chr5:142697868
		Cognition	PACC	Longitudinal	HADS-D	cg19645279	268	0.992	0.992	0.50627	0.03156	0.23017	OpenSea	chr5:142702733
		Cognition	PACC	Longitudinal	HADS-D	cg19176661	268	0.2554	0.9419	0.90339	0.00908	0.09406	OpenSea	chr5:142718549
		Cognition	PACC	Longitudinal	HADS-D	cg07715663	268	0.2859	0.9419	0.89993	0.0077	0.06068	OpenSea	chr5:142721796
		Cognition	PACC	Longitudinal	HADS-D	cg24052866	268	0.0698	0.9419	0.69336	0.03805	0.44354	OpenSea	chr5:142727470
		Cognition	PACC	Longitudinal	HADS-D	cg22233604	268	0.9334	0.992	0.80239	0.02828	0.34628	OpenSea	chr5:142729377
		Cognition	PACC	Longitudinal	HADS-D	cg03857453	268	0.3987	0.9419	0.71757	0.04588	0.42058	OpenSea	chr5:142729913
		Cognition	PACC	Longitudinal	HADS-D	cg15115787	268	0.9013	0.9756	0.2334	0.0467	0.33835	OpenSea	chr5:142730701
		Cognition	PACC	Longitudinal	HADS-D	cg12888360	268	0.2959	0.9419	0.19071	0.0335	0.21819	OpenSea	chr5:142732502
		Cognition	PACC	Longitudinal	HADS-D	cg18484679	268	0.8852	0.9756	0.85401	0.0155	0.16305	OpenSea	chr5:142740314
		Cognition	PACC	Longitudinal	HADS-D	cg16586394	268	0.2045	0.9419	0.90913	0.01422	0.19939	OpenSea	chr5:142757011
		Cognition	PACC	Longitudinal	HADS-D	cg25535999	268	0.2847	0.9419	0.89419	0.01191	0.0902	OpenSea	chr5:142757312
		Cognition	PACC	Longitudinal	HADS-D	cg03746860	268	0.8414	0.9756	0.89502	0.01114	0.14119	OpenSea	chr5:142759375
		Cognition	PACC	Longitudinal	HADS-D	cg20598211	268	0.1777	0.9419	0.91627	0.01158	0.20941	OpenSea	chr5:142762454
		Cognition	PACC	Longitudinal	HADS-D	cg05483455	268	0.3791	0.9419	0.92855	0.00637	0.07369	OpenSea	chr5:142762613
		Cognition	PACC	Longitudinal	HADS-D	cg16594263	268	0.4505	0.9419	0.91923	0.01644	0.42455	OpenSea	chr5:142768048
		Cognition	PACC	Longitudinal	HADS-D	cg16535116	268	0.7309	0.9756	0.82395	0.0209	0.17773	OpenSea	chr5:142769612
		Cognition	PACC	Longitudinal	HADS-D	cg05900547	268	0.7052	0.9756	0.82362	0.01868	0.15468	OpenSea	chr5:142769791
		Cognition	PACC	Longitudinal	HADS-D	cg19432243	268	0.5517	0.9535	0.75237	0.06043	0.89556	OpenSea	chr5:142770757
		Cognition	PACC	Longitudinal	HADS-D	cg19820298	268	0.8296	0.9756	0.78285	0.05639	0.30689	OpenSea	chr5:142770782
		Cognition	PACC	Longitudinal	HADS-D	cg27107893	268	0.5713	0.9556	0.79309	0.09578	0.9445	OpenSea	chr5:142776274
		Cognition	PACC	Longitudinal	HADS-D	cg17342132	268	0.5505	0.9535	0.86999	0.03297	0.31216	N_Shore	chr5:142780254
		Cognition	PACC	Longitudinal	HADS-D	cg07742588	268	0.2545	0.9419	0.78914	0.05595	0.91885	N_Shore	chr5:142780439
		Cognition	PACC	Longitudinal	HADS-D	cg00294552	268	0.9916	0.992	0.84207	0.02221	0.20462	N_Shore	chr5:142780486
		Cognition	PACC	Longitudinal	HADS-D	cg16219186	268	0.5594	0.9535	0.88479	0.02148	0.22312	N_Shore	chr5:142780531
		Cognition	PACC	Longitudinal	HADS-D	cg08845721	268	0.4425	0.9419	0.90291	0.02257	0.35006	N_Shore	chr5:142780693
		Cognition	PACC	Longitudinal	HADS-D	cg12969488	268	0.3228	0.9419	0.6959	0.03946	0.36342	N_Shore	chr5:142780984
		Cognition	PACC	Longitudinal	HADS-D	cg07733851	268	0.2545	0.9419	0.31012	0.05444	0.48866	N_Shore	chr5:142781498
		Cognition	PACC	Longitudinal	HADS-D	cg27122725	268	0.858	0.9756	0.08247	0.03649	0.61758	N_Shore	chr5:142781723
		Cognition	PACC	Longitudinal	HADS-D	cg06952416	268	0.8371	0.9756	0.10317	0.01595	0.14679	N_Shore	chr5:142781736
		Cognition	PACC	Longitudinal	HADS-D	cg15910486	268	0.6809	0.9756	0.06987	0.01223	0.07877	Island	chr5:142783621
		Cognition	PACC	Longitudinal	HADS-D	cg01967637	268	0.5289	0.9535	0.05849	0.01419	0.08687	Island	chr5:142784019
		Cognition	PACC	Longitudinal	HADS-D	cg26464411	268	0.5597	0.9535	0.0622	0.01192	0.08127	Island	chr5:142784222
		Cognition	PACC	Longitudinal	HADS-D	cg06968181	268	0.4061	0.9419	0.05291	0.02403	0.66787	Island	chr5:142784323
		Cognition	PACC	Longitudinal	HADS-D	cg21702128	268	0.1987	0.9419	0.08227	0.00965	0.07742	Island	chr5:142784721
		Cognition	PACC	Longitudinal	HADS-D	cg18718518	268	0.7557	0.9756	0.53255	0.05217	0.3892	S_Shore	chr5:142785455
		Cognition	PACC	Longitudinal	HADS-D	cg13764763	268	0.983	0.992	0.85356	0.05856	0.5219	S_Shore	chr5:142785501
		Cognition	PACC	Longitudinal	HADS-D	cg16224829	268	0.1738	0.9419	0.79156	0.03531	0.28375	OpenSea	chr5:142792698
		Cognition	PACC	Longitudinal	HADS-D	cg01751279	268	0.2733	0.9419	0.83882	0.03986	0.35649	OpenSea	chr5:142793924
		Cognition	PACC	Longitudinal	HADS-D	cg23430507	268	0.6088	0.9656	0.67871	0.03655	0.31636	OpenSea	chr5:142798375
		Cognition	PACC	Longitudinal	HADS-D	cg17349736	268	0.4395	0.9419	0.8687	0.01502	0.1392	OpenSea	chr5:142802329
		Cognition	PACC	Longitudinal	HADS-D	cg14438279	268	0.8001	0.9756	0.80706	0.05892	0.46785	OpenSea	chr5:142806343
		Cognition	PACC	Longitudinal	HADS-D	cg08423118	268	0.2077	0.9419	0.77492	0.07191	0.32112	OpenSea	chr5:142808610
		Cognition	PACC	Longitudinal	HADS-D	cg23776787	268	0.1132	0.9419	0.05181	0.01906	0.42487	OpenSea	chr5:142814315
		Cognition	PACC	Longitudinal	HADS-D	cg03906910	268	0.8797	0.9756	0.22081	0.05239	0.37839	OpenSea	chr5:142814388
		Cognition	PACC	Longitudinal	HADS-D	cg07589972	268	0.2886	0.9419	0.90005	0.01417	0.2547	OpenSea	chr5:142815463
		Cognition	PACC	Longitudinal	HADS-D	cg12466613	268	0.0488	0.9419	0.91748	0.01192	0.24478	OpenSea	chr5:142815469
		Cognition	PACC	Longitudinal	HADS-D	cg21979215	268	0.7366	0.9756	0.76917	0.06877	0.39558	OpenSea	chr5:142815807
		Cognition	PACC	Longitudinal	HADS-D	cg11022710	268	0.3091	0.9419	0.90751	0.01966	0.20763	OpenSea	chr5:142820479
		Cognition	PACC	Cross-Sectional	GDS	cg23650353	298	0.3282	0.7549	0.92108	0.028	0.43394	OpenSea	chr4:148993643
		Cognition	PACC	Cross-Sectional	GDS	cg19491599	298	0.2603	0.6963	0.84529	0.0161	0.20857	OpenSea	chr4:149000607
		Cognition	PACC	Cross-Sectional	GDS	cg10207656	298	0.5001	0.7963	0.90855	0.01373	0.20071	OpenSea	chr4:149019526
		Cognition	PACC	Cross-Sectional	GDS	cg09143276	298	0.729	0.826	0.80845	0.02074	0.13091	OpenSea	chr4:149066518
		Cognition	PACC	Cross-Sectional	GDS	cg13000004	298	0.7426	0.826	0.86983	0.01161	0.09813	OpenSea	chr4:149074093
		Cognition	PACC	Cross-Sectional	GDS	cg10590842	298	0.9543	0.9673	0.9034	0.01143	0.10122	OpenSea	chr4:149083955
		Cognition	PACC	Cross-Sectional	GDS	cg21701890	298	0.6233	0.7965	0.61622	0.02898	0.23369	OpenSea	chr4:149094632
		Cognition	PACC	Cross-Sectional	GDS	cg27234800	298	0.6046	0.7963	0.89127	0.0525	0.39493	OpenSea	chr4:149116611
		Cognition	PACC	Cross-Sectional	GDS	cg25672354	298	0.3801	0.7561	0.86697	0.01933	0.23574	OpenSea	chr4:149122383
		Cognition	PACC	Cross-Sectional	GDS	cg10993059	298	0.3602	0.7561	0.892	0.014	0.24786	OpenSea	chr4:149123062
		Cognition	PACC	Cross-Sectional	GDS	cg07335874	298	0.4243	0.7561	0.89734	0.01678	0.25463	OpenSea	chr4:149136507
		Cognition	PACC	Cross-Sectional	GDS	cg08264907	298	0.4248	0.7561	0.90365	0.00834	0.08404	OpenSea	chr4:149144045
		Cognition	PACC	Cross-Sectional	GDS	cg07275757	298	0.5295	0.7963	0.89578	0.01331	0.13086	OpenSea	chr4:149189974
		Cognition	PACC	Cross-Sectional	GDS	cg13157799	298	0.5615	0.7963	0.05908	0.01227	0.14832	OpenSea	chr4:149191991
		Cognition	PACC	Cross-Sectional	GDS	cg00328411	298	0.5307	0.7963	0.90656	0.00839	0.10838	OpenSea	chr4:149205617
		Cognition	PACC	Cross-Sectional	GDS	cg02471166	298	0.1066	0.6254	0.62905	0.02431	0.28086	OpenSea	chr4:149244985
		Cognition	PACC	Cross-Sectional	GDS	cg27225476	298	0.1253	0.6254	0.85878	0.01502	0.11725	OpenSea	chr4:149275542
		Cognition	PACC	Cross-Sectional	GDS	cg06240648	298	0.2561	0.6963	0.90857	0.00875	0.08216	OpenSea	chr4:149289762
		Cognition	PACC	Cross-Sectional	GDS	cg04867484	298	0.4432	0.7561	0.06179	0.03171	0.6046	OpenSea	chr4:149297469
		Cognition	PACC	Cross-Sectional	GDS	cg19496136	298	0.2725	0.6963	0.74636	0.06158	0.84904	OpenSea	chr4:149336765
		Cognition	PACC	Cross-Sectional	GDS	cg17253842	298	0.8711	0.9319	0.87057	0.02004	0.40157	OpenSea	chr4:149347991
		Cognition	PACC	Cross-Sectional	GDS	cg19650300	298	0.6029	0.7963	0.87161	0.0124	0.12937	OpenSea	chr4:149357960
		Cognition	PACC	Cross-Sectional	GDS	cg09238384	298	0.0363	0.6254	0.88033	0.01059	0.10479	OpenSea	chr4:149358199
		Cognition	PACC	Cross-Sectional	GDS	cg07651033	298	0.8987	0.9396	0.891	0.01412	0.08448	OpenSea	chr4:149359043
		Cognition	PACC	Cross-Sectional	GDS	cg23329208	298	0.6971	0.826	0.89218	0.01003	0.08891	N_Shelf	chr4:149360981
		Cognition	PACC	Cross-Sectional	GDS	cg05437692	298	0.1897	0.6536	0.28837	0.04393	0.32226	N_Shore	chr4:149362435
		Cognition	PACC	Cross-Sectional	GDS	cg27460943	298	0.1916	0.6536	0.08292	0.02603	0.31306	N_Shore	chr4:149362809
		Cognition	PACC	Cross-Sectional	GDS	cg01576854	298	0.0929	0.6254	0.07386	0.01207	0.20464	Island	chr4:149363450
		Cognition	PACC	Cross-Sectional	GDS	cg13996731	298	0.237	0.6963	0.05943	0.00984	0.12921	Island	chr4:149363522
		Cognition	PACC	Cross-Sectional	GDS	cg20140452	298	0.1344	0.6254	0.07045	0.00971	0.0619	Island	chr4:149363715
		Cognition	PACC	Cross-Sectional	GDS	cg10621979	298	0.125	0.6254	0.05355	0.018	0.29521	Island	chr4:149365824
		Cognition	PACC	Cross-Sectional	GDS	cg11239219	298	0.5838	0.7963	0.05479	0.02153	0.3658	Island	chr4:149365887
		Cognition	PACC	Cross-Sectional	GDS	cg10002915	298	0.2054	0.6536	0.54242	0.08455	0.73095	S_Shelf	chr4:149369175
		Cognition	PACC	Cross-Sectional	GDS	cg15374100	298	0.4074	0.7561	0.86961	0.01354	0.2065	OpenSea	chr5:142651239
		Cognition	PACC	Cross-Sectional	GDS	cg15740681	298	0.0646	0.6254	0.89095	0.00925	0.09622	OpenSea	chr5:142653066
		Cognition	PACC	Cross-Sectional	GDS	cg26081259	298	0.6084	0.7963	0.92585	0.00714	0.05144	OpenSea	chr5:142659682
		Cognition	PACC	Cross-Sectional	GDS	cg13514002	298	0.9194	0.9504	0.9104	0.01216	0.16497	OpenSea	chr5:142677292
		Cognition	PACC	Cross-Sectional	GDS	cg24801588	298	0.3541	0.7561	0.87613	0.01121	0.08119	OpenSea	chr5:142689858
		Cognition	PACC	Cross-Sectional	GDS	cg00407401	298	0.0335	0.6254	0.88336	0.0113	0.12225	OpenSea	chr5:142690959
		Cognition	PACC	Cross-Sectional	GDS	cg19457823	298	0.4545	0.7561	0.85324	0.04572	0.44993	OpenSea	chr5:142692961
		Cognition	PACC	Cross-Sectional	GDS	cg12741214	298	0.7082	0.826	0.92153	0.00739	0.05446	OpenSea	chr5:142695619
		Cognition	PACC	Cross-Sectional	GDS	cg04457787	298	0.8912	0.9396	0.91851	0.00864	0.10367	OpenSea	chr5:142695636
		Cognition	PACC	Cross-Sectional	GDS	cg20728768	298	0.8335	0.9022	0.28495	0.05593	0.42144	OpenSea	chr5:142696594
		Cognition	PACC	Cross-Sectional	GDS	cg25708981	298	0.9854	0.9854	0.81142	0.04619	0.93615	OpenSea	chr5:142697868
		Cognition	PACC	Cross-Sectional	GDS	cg19645279	298	0.4602	0.7561	0.50627	0.03156	0.23017	OpenSea	chr5:142702733
		Cognition	PACC	Cross-Sectional	GDS	cg19176661	298	0.0199	0.6254	0.90339	0.00908	0.09406	OpenSea	chr5:142718549
		Cognition	PACC	Cross-Sectional	GDS	cg07715663	298	0.0998	0.6254	0.89993	0.0077	0.06068	OpenSea	chr5:142721796
		Cognition	PACC	Cross-Sectional	GDS	cg24052866	298	0.0509	0.6254	0.69336	0.03805	0.44354	OpenSea	chr5:142727470
		Cognition	PACC	Cross-Sectional	GDS	cg22233604	298	0.5964	0.7963	0.80239	0.02828	0.34628	OpenSea	chr5:142729377
		Cognition	PACC	Cross-Sectional	GDS	cg03857453	298	0.059	0.6254	0.71757	0.04588	0.42058	OpenSea	chr5:142729913
		Cognition	PACC	Cross-Sectional	GDS	cg15115787	298	0.5349	0.7963	0.2334	0.0467	0.33835	OpenSea	chr5:142730701
		Cognition	PACC	Cross-Sectional	GDS	cg12888360	298	0.2478	0.6963	0.19071	0.0335	0.21819	OpenSea	chr5:142732502
		Cognition	PACC	Cross-Sectional	GDS	cg18484679	298	0.7109	0.826	0.85401	0.0155	0.16305	OpenSea	chr5:142740314
		Cognition	PACC	Cross-Sectional	GDS	cg16586394	298	0.266	0.6963	0.90913	0.01422	0.19939	OpenSea	chr5:142757011
		Cognition	PACC	Cross-Sectional	GDS	cg25535999	298	0.1463	0.6409	0.89419	0.01191	0.0902	OpenSea	chr5:142757312
		Cognition	PACC	Cross-Sectional	GDS	cg03746860	298	0.4371	0.7561	0.89502	0.01114	0.14119	OpenSea	chr5:142759375
		Cognition	PACC	Cross-Sectional	GDS	cg20598211	298	0.1626	0.6536	0.91627	0.01158	0.20941	OpenSea	chr5:142762454
		Cognition	PACC	Cross-Sectional	GDS	cg05483455	298	0.06	0.6254	0.92855	0.00637	0.07369	OpenSea	chr5:142762613
		Cognition	PACC	Cross-Sectional	GDS	cg16594263	298	0.5187	0.7963	0.91923	0.01644	0.42455	OpenSea	chr5:142768048
		Cognition	PACC	Cross-Sectional	GDS	cg16535116	298	0.7352	0.826	0.82395	0.0209	0.17773	OpenSea	chr5:142769612
		Cognition	PACC	Cross-Sectional	GDS	cg05900547	298	0.136	0.6254	0.82362	0.01868	0.15468	OpenSea	chr5:142769791
		Cognition	PACC	Cross-Sectional	GDS	cg19432243	298	0.1287	0.6254	0.75237	0.06043	0.89556	OpenSea	chr5:142770757
		Cognition	PACC	Cross-Sectional	GDS	cg19820298	298	0.6146	0.7963	0.78285	0.05639	0.30689	OpenSea	chr5:142770782
		Cognition	PACC	Cross-Sectional	GDS	cg27107893	298	0.1736	0.6536	0.79309	0.09578	0.9445	OpenSea	chr5:142776274
		Cognition	PACC	Cross-Sectional	GDS	cg17342132	298	0.4201	0.7561	0.86999	0.03297	0.31216	N_Shore	chr5:142780254
		Cognition	PACC	Cross-Sectional	GDS	cg07742588	298	0.2937	0.7111	0.78914	0.05595	0.91885	N_Shore	chr5:142780439
		Cognition	PACC	Cross-Sectional	GDS	cg00294552	298	0.1935	0.6536	0.84207	0.02221	0.20462	N_Shore	chr5:142780486
		Cognition	PACC	Cross-Sectional	GDS	cg16219186	298	0.189	0.6536	0.88479	0.02148	0.22312	N_Shore	chr5:142780531
		Cognition	PACC	Cross-Sectional	GDS	cg08845721	298	0.5396	0.7963	0.90291	0.02257	0.35006	N_Shore	chr5:142780693
		Cognition	PACC	Cross-Sectional	GDS	cg12969488	298	0.053	0.6254	0.6959	0.03946	0.36342	N_Shore	chr5:142780984
		Cognition	PACC	Cross-Sectional	GDS	cg07733851	298	0.0794	0.6254	0.31012	0.05444	0.48866	N_Shore	chr5:142781498
		Cognition	PACC	Cross-Sectional	GDS	cg27122725	298	0.4576	0.7561	0.08247	0.03649	0.61758	N_Shore	chr5:142781723
		Cognition	PACC	Cross-Sectional	GDS	cg06952416	298	0.3063	0.7225	0.10317	0.01595	0.14679	N_Shore	chr5:142781736
		Cognition	PACC	Cross-Sectional	GDS	cg15910486	298	0.6978	0.826	0.06987	0.01223	0.07877	Island	chr5:142783621
		Cognition	PACC	Cross-Sectional	GDS	cg01967637	298	0.117	0.6254	0.05849	0.01419	0.08687	Island	chr5:142784019
		Cognition	PACC	Cross-Sectional	GDS	cg26464411	298	0.7452	0.826	0.0622	0.01192	0.08127	Island	chr5:142784222
		Cognition	PACC	Cross-Sectional	GDS	cg06968181	298	0.5971	0.7963	0.05291	0.02403	0.66787	Island	chr5:142784323
		Cognition	PACC	Cross-Sectional	GDS	cg21702128	298	0.6907	0.826	0.08227	0.00965	0.07742	Island	chr5:142784721
		Cognition	PACC	Cross-Sectional	GDS	cg18718518	298	0.8147	0.8923	0.53255	0.05217	0.3892	S_Shore	chr5:142785455
		Cognition	PACC	Cross-Sectional	GDS	cg13764763	298	0.9567	0.9673	0.85356	0.05856	0.5219	S_Shore	chr5:142785501
		Cognition	PACC	Cross-Sectional	GDS	cg16224829	298	0.5937	0.7963	0.79156	0.03531	0.28375	OpenSea	chr5:142792698
		Cognition	PACC	Cross-Sectional	GDS	cg01751279	298	0.3707	0.7561	0.83882	0.03986	0.35649	OpenSea	chr5:142793924
		Cognition	PACC	Cross-Sectional	GDS	cg23430507	298	0.7394	0.826	0.67871	0.03655	0.31636	OpenSea	chr5:142798375
		Cognition	PACC	Cross-Sectional	GDS	cg17349736	298	0.2064	0.6536	0.8687	0.01502	0.1392	OpenSea	chr5:142802329
		Cognition	PACC	Cross-Sectional	GDS	cg14438279	298	0.3374	0.7561	0.80706	0.05892	0.46785	OpenSea	chr5:142806343
		Cognition	PACC	Cross-Sectional	GDS	cg08423118	298	0.0489	0.6254	0.77492	0.07191	0.32112	OpenSea	chr5:142808610
		Cognition	PACC	Cross-Sectional	GDS	cg23776787	298	0.4375	0.7561	0.05181	0.01906	0.42487	OpenSea	chr5:142814315
		Cognition	PACC	Cross-Sectional	GDS	cg03906910	298	0.2925	0.7111	0.22081	0.05239	0.37839	OpenSea	chr5:142814388
		Cognition	PACC	Cross-Sectional	GDS	cg07589972	298	0.0964	0.6254	0.90005	0.01417	0.2547	OpenSea	chr5:142815463
		Cognition	PACC	Cross-Sectional	GDS	cg12466613	298	0.6459	0.814	0.91748	0.01192	0.24478	OpenSea	chr5:142815469
		Cognition	PACC	Cross-Sectional	GDS	cg21979215	298	0.2131	0.6536	0.76917	0.06877	0.39558	OpenSea	chr5:142815807
		Cognition	PACC	Cross-Sectional	GDS	cg11022710	298	0.3631	0.7561	0.90751	0.01966	0.20763	OpenSea	chr5:142820479
		Cognition	PACC	Longitudinal	GDS	cg23650353	268	0.8223	0.8977	0.92108	0.028	0.43394	OpenSea	chr4:148993643
		Cognition	PACC	Longitudinal	GDS	cg19491599	268	0.5248	0.7915	0.84529	0.0161	0.20857	OpenSea	chr4:149000607
		Cognition	PACC	Longitudinal	GDS	cg10207656	268	0.083	0.3973	0.90855	0.01373	0.20071	OpenSea	chr4:149019526
		Cognition	PACC	Longitudinal	GDS	cg09143276	268	0.1459	0.6279	0.80845	0.02074	0.13091	OpenSea	chr4:149066518
		Cognition	PACC	Longitudinal	GDS	cg13000004	268	0.0196	0.2132	0.86983	0.01161	0.09813	OpenSea	chr4:149074093
		Cognition	PACC	Longitudinal	GDS	cg10590842	268	0.0003	0.0142	0.9034	0.01143	0.10122	OpenSea	chr4:149083955
		Cognition	PACC	Longitudinal	GDS	cg21701890	268	0.2791	0.6279	0.61622	0.02898	0.23369	OpenSea	chr4:149094632
		Cognition	PACC	Longitudinal	GDS	cg27234800	268	0.6377	0.8246	0.89127	0.0525	0.39493	OpenSea	chr4:149116611
		Cognition	PACC	Longitudinal	GDS	cg25672354	268	0.0209	0.2132	0.86697	0.01933	0.23574	OpenSea	chr4:149122383
		Cognition	PACC	Longitudinal	GDS	cg10993059	268	0.2031	0.6279	0.892	0.014	0.24786	OpenSea	chr4:149123062
		Cognition	PACC	Longitudinal	GDS	cg07335874	268	0.3077	0.6373	0.89734	0.01678	0.25463	OpenSea	chr4:149136507
		Cognition	PACC	Longitudinal	GDS	cg08264907	268	0.2364	0.6279	0.90365	0.00834	0.08404	OpenSea	chr4:149144045
		Cognition	PACC	Longitudinal	GDS	cg07275757	268	0.1688	0.6279	0.89578	0.01331	0.13086	OpenSea	chr4:149189974
		Cognition	PACC	Longitudinal	GDS	cg13157799	268	0.881	0.9316	0.05908	0.01227	0.14832	OpenSea	chr4:149191991
		Cognition	PACC	Longitudinal	GDS	cg00328411	268	0.2385	0.6279	0.90656	0.00839	0.10838	OpenSea	chr4:149205617
		Cognition	PACC	Longitudinal	GDS	cg02471166	268	0.6004	0.818	0.62905	0.02431	0.28086	OpenSea	chr4:149244985
		Cognition	PACC	Longitudinal	GDS	cg27225476	268	0.6583	0.8296	0.85878	0.01502	0.11725	OpenSea	chr4:149275542
		Cognition	PACC	Longitudinal	GDS	cg06240648	268	0.2068	0.6279	0.90857	0.00875	0.08216	OpenSea	chr4:149289762
		Cognition	PACC	Longitudinal	GDS	cg04867484	268	0.3167	0.6373	0.06179	0.03171	0.6046	OpenSea	chr4:149297469
		Cognition	PACC	Longitudinal	GDS	cg19496136	268	0.2236	0.6279	0.74636	0.06158	0.84904	OpenSea	chr4:149336765
		Cognition	PACC	Longitudinal	GDS	cg17253842	268	0.0747	0.3816	0.87057	0.02004	0.40157	OpenSea	chr4:149347991
		Cognition	PACC	Longitudinal	GDS	cg19650300	268	0.816	0.8977	0.87161	0.0124	0.12937	OpenSea	chr4:149357960
		Cognition	PACC	Longitudinal	GDS	cg09238384	268	0.2867	0.6279	0.88033	0.01059	0.10479	OpenSea	chr4:149358199
		Cognition	PACC	Longitudinal	GDS	cg07651033	268	0.0341	0.2517	0.891	0.01412	0.08448	OpenSea	chr4:149359043
		Cognition	PACC	Longitudinal	GDS	cg23329208	268	0.4645	0.7343	0.89218	0.01003	0.08891	N_Shelf	chr4:149360981
		Cognition	PACC	Longitudinal	GDS	cg05437692	268	0.2858	0.6279	0.28837	0.04393	0.32226	N_Shore	chr4:149362435
		Cognition	PACC	Longitudinal	GDS	cg27460943	268	0.5459	0.81	0.08292	0.02603	0.31306	N_Shore	chr4:149362809
		Cognition	PACC	Longitudinal	GDS	cg01576854	268	0.3859	0.71	0.07386	0.01207	0.20464	Island	chr4:149363450
		Cognition	PACC	Longitudinal	GDS	cg13996731	268	0.0478	0.3142	0.05943	0.00984	0.12921	Island	chr4:149363522
		Cognition	PACC	Longitudinal	GDS	cg20140452	268	0.3186	0.6373	0.07045	0.00971	0.0619	Island	chr4:149363715
		Cognition	PACC	Longitudinal	GDS	cg10621979	268	0.359	0.6881	0.05355	0.018	0.29521	Island	chr4:149365824
		Cognition	PACC	Longitudinal	GDS	cg11239219	268	0.6261	0.8246	0.05479	0.02153	0.3658	Island	chr4:149365887
		Cognition	PACC	Longitudinal	GDS	cg10002915	268	0.0864	0.3973	0.54242	0.08455	0.73095	S_Shelf	chr4:149369175
		Cognition	PACC	Longitudinal	GDS	cg15374100	268	0.604	0.818	0.86961	0.01354	0.2065	OpenSea	chr5:142651239
		Cognition	PACC	Longitudinal	GDS	cg15740681	268	0.2598	0.6279	0.89095	0.00925	0.09622	OpenSea	chr5:142653066
		Cognition	PACC	Longitudinal	GDS	cg26081259	268	0.47	0.7343	0.92585	0.00714	0.05144	OpenSea	chr5:142659682
		Cognition	PACC	Longitudinal	GDS	cg13514002	268	0.466	0.7343	0.9104	0.01216	0.16497	OpenSea	chr5:142677292
		Cognition	PACC	Longitudinal	GDS	cg24801588	268	0.9568	0.9714	0.87613	0.01121	0.08119	OpenSea	chr5:142689858
		Cognition	PACC	Longitudinal	GDS	cg00407401	268	0.2758	0.6279	0.88336	0.0113	0.12225	OpenSea	chr5:142690959
		Cognition	PACC	Longitudinal	GDS	cg19457823	268	0.4365	0.7343	0.85324	0.04572	0.44993	OpenSea	chr5:142692961
		Cognition	PACC	Longitudinal	GDS	cg12741214	268	0.5761	0.8156	0.92153	0.00739	0.05446	OpenSea	chr5:142695619
		Cognition	PACC	Longitudinal	GDS	cg04457787	268	0.4198	0.7343	0.91851	0.00864	0.10367	OpenSea	chr5:142695636
		Cognition	PACC	Longitudinal	GDS	cg20728768	268	0.5763	0.8156	0.28495	0.05593	0.42144	OpenSea	chr5:142696594
		Cognition	PACC	Longitudinal	GDS	cg25708981	268	0.1939	0.6279	0.81142	0.04619	0.93615	OpenSea	chr5:142697868
		Cognition	PACC	Longitudinal	GDS	cg19645279	268	0.0704	0.3812	0.50627	0.03156	0.23017	OpenSea	chr5:142702733
		Cognition	PACC	Longitudinal	GDS	cg19176661	268	0.4502	0.7343	0.90339	0.00908	0.09406	OpenSea	chr5:142718549
		Cognition	PACC	Longitudinal	GDS	cg07715663	268	0.7057	0.8474	0.89993	0.0077	0.06068	OpenSea	chr5:142721796
		Cognition	PACC	Longitudinal	GDS	cg24052866	268	0	0.0003	0.69336	0.03805	0.44354	OpenSea	chr5:142727470
		Cognition	PACC	Longitudinal	GDS	cg22233604	268	0.1922	0.6279	0.80239	0.02828	0.34628	OpenSea	chr5:142729377
		Cognition	PACC	Longitudinal	GDS	cg03857453	268	0.3788	0.71	0.71757	0.04588	0.42058	OpenSea	chr5:142729913
		Cognition	PACC	Longitudinal	GDS	cg15115787	268	0.8041	0.8977	0.2334	0.0467	0.33835	OpenSea	chr5:142730701
		Cognition	PACC	Longitudinal	GDS	cg12888360	268	0.0106	0.1944	0.19071	0.0335	0.21819	OpenSea	chr5:142732502
		Cognition	PACC	Longitudinal	GDS	cg18484679	268	0.9127	0.9475	0.85401	0.0155	0.16305	OpenSea	chr5:142740314
		Cognition	PACC	Longitudinal	GDS	cg16586394	268	0.2133	0.6279	0.90913	0.01422	0.19939	OpenSea	chr5:142757011
		Cognition	PACC	Longitudinal	GDS	cg25535999	268	0.8055	0.8977	0.89419	0.01191	0.0902	OpenSea	chr5:142757312
		Cognition	PACC	Longitudinal	GDS	cg03746860	268	0.6454	0.8246	0.89502	0.01114	0.14119	OpenSea	chr5:142759375
		Cognition	PACC	Longitudinal	GDS	cg20598211	268	0.0295	0.2517	0.91627	0.01158	0.20941	OpenSea	chr5:142762454
		Cognition	PACC	Longitudinal	GDS	cg05483455	268	0.7178	0.8474	0.92855	0.00637	0.07369	OpenSea	chr5:142762613
		Cognition	PACC	Longitudinal	GDS	cg16594263	268	0.2857	0.6279	0.91923	0.01644	0.42455	OpenSea	chr5:142768048
		Cognition	PACC	Longitudinal	GDS	cg16535116	268	0.9166	0.9475	0.82395	0.0209	0.17773	OpenSea	chr5:142769612
		Cognition	PACC	Longitudinal	GDS	cg05900547	268	0.6889	0.8451	0.82362	0.01868	0.15468	OpenSea	chr5:142769791
		Cognition	PACC	Longitudinal	GDS	cg19432243	268	0.8294	0.8977	0.75237	0.06043	0.89556	OpenSea	chr5:142770757
		Cognition	PACC	Longitudinal	GDS	cg19820298	268	0.4261	0.7343	0.78285	0.05639	0.30689	OpenSea	chr5:142770782
		Cognition	PACC	Longitudinal	GDS	cg27107893	268	0.2616	0.6279	0.79309	0.09578	0.9445	OpenSea	chr5:142776274
		Cognition	PACC	Longitudinal	GDS	cg17342132	268	0.0356	0.2517	0.86999	0.03297	0.31216	N_Shore	chr5:142780254
		Cognition	PACC	Longitudinal	GDS	cg07742588	268	0.1792	0.6279	0.78914	0.05595	0.91885	N_Shore	chr5:142780439
		Cognition	PACC	Longitudinal	GDS	cg00294552	268	0.2122	0.6279	0.84207	0.02221	0.20462	N_Shore	chr5:142780486
		Cognition	PACC	Longitudinal	GDS	cg16219186	268	0.2289	0.6279	0.88479	0.02148	0.22312	N_Shore	chr5:142780531
		Cognition	PACC	Longitudinal	GDS	cg08845721	268	0.0542	0.3267	0.90291	0.02257	0.35006	N_Shore	chr5:142780693
		Cognition	PACC	Longitudinal	GDS	cg12969488	268	0.3022	0.6373	0.6959	0.03946	0.36342	N_Shore	chr5:142780984
		Cognition	PACC	Longitudinal	GDS	cg07733851	268	0.0334	0.2517	0.31012	0.05444	0.48866	N_Shore	chr5:142781498
		Cognition	PACC	Longitudinal	GDS	cg27122725	268	0.9847	0.9847	0.08247	0.03649	0.61758	N_Shore	chr5:142781723
		Cognition	PACC	Longitudinal	GDS	cg06952416	268	0.6677	0.8301	0.10317	0.01595	0.14679	N_Shore	chr5:142781736
		Cognition	PACC	Longitudinal	GDS	cg15910486	268	0.0037	0.1121	0.06987	0.01223	0.07877	Island	chr5:142783621
		Cognition	PACC	Longitudinal	GDS	cg01967637	268	0.0163	0.2132	0.05849	0.01419	0.08687	Island	chr5:142784019
		Cognition	PACC	Longitudinal	GDS	cg26464411	268	0.0058	0.1335	0.0622	0.01192	0.08127	Island	chr5:142784222
		Cognition	PACC	Longitudinal	GDS	cg06968181	268	0.3485	0.6822	0.05291	0.02403	0.66787	Island	chr5:142784323
		Cognition	PACC	Longitudinal	GDS	cg21702128	268	0.4544	0.7343	0.08227	0.00965	0.07742	Island	chr5:142784721
		Cognition	PACC	Longitudinal	GDS	cg18718518	268	0.7185	0.8474	0.53255	0.05217	0.3892	S_Shore	chr5:142785455
		Cognition	PACC	Longitudinal	GDS	cg13764763	268	0.5243	0.7915	0.85356	0.05856	0.5219	S_Shore	chr5:142785501
		Cognition	PACC	Longitudinal	GDS	cg16224829	268	0.8393	0.8979	0.79156	0.03531	0.28375	OpenSea	chr5:142792698
		Cognition	PACC	Longitudinal	GDS	cg01751279	268	0.6046	0.818	0.83882	0.03986	0.35649	OpenSea	chr5:142793924
		Cognition	PACC	Longitudinal	GDS	cg23430507	268	0.1574	0.6279	0.67871	0.03655	0.31636	OpenSea	chr5:142798375
		Cognition	PACC	Longitudinal	GDS	cg17349736	268	0.4709	0.7343	0.8687	0.01502	0.1392	OpenSea	chr5:142802329
		Cognition	PACC	Longitudinal	GDS	cg14438279	268	0.2849	0.6279	0.80706	0.05892	0.46785	OpenSea	chr5:142806343
		Cognition	PACC	Longitudinal	GDS	cg08423118	268	0.0181	0.2132	0.77492	0.07191	0.32112	OpenSea	chr5:142808610
		Cognition	PACC	Longitudinal	GDS	cg23776787	268	0.0568	0.3267	0.05181	0.01906	0.42487	OpenSea	chr5:142814315
		Cognition	PACC	Longitudinal	GDS	cg03906910	268	0.9608	0.9714	0.22081	0.05239	0.37839	OpenSea	chr5:142814388
		Cognition	PACC	Longitudinal	GDS	cg07589972	268	0.5761	0.8156	0.90005	0.01417	0.2547	OpenSea	chr5:142815463
		Cognition	PACC	Longitudinal	GDS	cg12466613	268	0.768	0.8943	0.91748	0.01192	0.24478	OpenSea	chr5:142815469
		Cognition	PACC	Longitudinal	GDS	cg21979215	268	0.8158	0.8977	0.76917	0.06877	0.39558	OpenSea	chr5:142815807
		Cognition	PACC	Longitudinal	GDS	cg11022710	268	0.6444	0.8246	0.90751	0.01966	0.20763	OpenSea	chr5:142820479
		Cognition	Attention and Processing	Cross-Sectional	HADS-A	cg23650353	298	0.9994	0.9994	0.92108	0.028	0.43394	OpenSea	chr4:148993643
		Cognition	Attention and Processing	Cross-Sectional	HADS-A	cg19491599	298	0.0168	0.7726	0.84529	0.0161	0.20857	OpenSea	chr4:149000607
		Cognition	Attention and Processing	Cross-Sectional	HADS-A	cg10207656	298	0.218	0.9772	0.90855	0.01373	0.20071	OpenSea	chr4:149019526
		Cognition	Attention and Processing	Cross-Sectional	HADS-A	cg09143276	298	0.5983	0.9772	0.80845	0.02074	0.13091	OpenSea	chr4:149066518
		Cognition	Attention and Processing	Cross-Sectional	HADS-A	cg13000004	298	0.7618	0.9772	0.86983	0.01161	0.09813	OpenSea	chr4:149074093
		Cognition	Attention and Processing	Cross-Sectional	HADS-A	cg10590842	298	0.5012	0.9772	0.9034	0.01143	0.10122	OpenSea	chr4:149083955
		Cognition	Attention and Processing	Cross-Sectional	HADS-A	cg21701890	298	0.6749	0.9772	0.61622	0.02898	0.23369	OpenSea	chr4:149094632
		Cognition	Attention and Processing	Cross-Sectional	HADS-A	cg27234800	298	0.5744	0.9772	0.89127	0.0525	0.39493	OpenSea	chr4:149116611
		Cognition	Attention and Processing	Cross-Sectional	HADS-A	cg25672354	298	0.2957	0.9772	0.86697	0.01933	0.23574	OpenSea	chr4:149122383
		Cognition	Attention and Processing	Cross-Sectional	HADS-A	cg10993059	298	0.3214	0.9772	0.892	0.014	0.24786	OpenSea	chr4:149123062
		Cognition	Attention and Processing	Cross-Sectional	HADS-A	cg07335874	298	0.3024	0.9772	0.89734	0.01678	0.25463	OpenSea	chr4:149136507
		Cognition	Attention and Processing	Cross-Sectional	HADS-A	cg08264907	298	0.9091	0.9957	0.90365	0.00834	0.08404	OpenSea	chr4:149144045
		Cognition	Attention and Processing	Cross-Sectional	HADS-A	cg07275757	298	0.3306	0.9772	0.89578	0.01331	0.13086	OpenSea	chr4:149189974
		Cognition	Attention and Processing	Cross-Sectional	HADS-A	cg13157799	298	0.2124	0.9772	0.05908	0.01227	0.14832	OpenSea	chr4:149191991
		Cognition	Attention and Processing	Cross-Sectional	HADS-A	cg00328411	298	0.9518	0.9961	0.90656	0.00839	0.10838	OpenSea	chr4:149205617
		Cognition	Attention and Processing	Cross-Sectional	HADS-A	cg02471166	298	0.0119	0.7726	0.62905	0.02431	0.28086	OpenSea	chr4:149244985
		Cognition	Attention and Processing	Cross-Sectional	HADS-A	cg27225476	298	0.8698	0.9844	0.85878	0.01502	0.11725	OpenSea	chr4:149275542
		Cognition	Attention and Processing	Cross-Sectional	HADS-A	cg06240648	298	0.0739	0.9772	0.90857	0.00875	0.08216	OpenSea	chr4:149289762
		Cognition	Attention and Processing	Cross-Sectional	HADS-A	cg04867484	298	0.6407	0.9772	0.06179	0.03171	0.6046	OpenSea	chr4:149297469
		Cognition	Attention and Processing	Cross-Sectional	HADS-A	cg19496136	298	0.8165	0.9772	0.74636	0.06158	0.84904	OpenSea	chr4:149336765
		Cognition	Attention and Processing	Cross-Sectional	HADS-A	cg17253842	298	0.6784	0.9772	0.87057	0.02004	0.40157	OpenSea	chr4:149347991
		Cognition	Attention and Processing	Cross-Sectional	HADS-A	cg19650300	298	0.4369	0.9772	0.87161	0.0124	0.12937	OpenSea	chr4:149357960
		Cognition	Attention and Processing	Cross-Sectional	HADS-A	cg09238384	298	0.3904	0.9772	0.88033	0.01059	0.10479	OpenSea	chr4:149358199
		Cognition	Attention and Processing	Cross-Sectional	HADS-A	cg07651033	298	0.1403	0.9772	0.891	0.01412	0.08448	OpenSea	chr4:149359043
		Cognition	Attention and Processing	Cross-Sectional	HADS-A	cg23329208	298	0.5015	0.9772	0.89218	0.01003	0.08891	N_Shelf	chr4:149360981
		Cognition	Attention and Processing	Cross-Sectional	HADS-A	cg05437692	298	0.9556	0.9961	0.28837	0.04393	0.32226	N_Shore	chr4:149362435
		Cognition	Attention and Processing	Cross-Sectional	HADS-A	cg27460943	298	0.514	0.9772	0.08292	0.02603	0.31306	N_Shore	chr4:149362809
		Cognition	Attention and Processing	Cross-Sectional	HADS-A	cg01576854	298	0.4521	0.9772	0.07386	0.01207	0.20464	Island	chr4:149363450
		Cognition	Attention and Processing	Cross-Sectional	HADS-A	cg13996731	298	0.7972	0.9772	0.05943	0.00984	0.12921	Island	chr4:149363522
		Cognition	Attention and Processing	Cross-Sectional	HADS-A	cg20140452	298	0.7648	0.9772	0.07045	0.00971	0.0619	Island	chr4:149363715
		Cognition	Attention and Processing	Cross-Sectional	HADS-A	cg10621979	298	0.6424	0.9772	0.05355	0.018	0.29521	Island	chr4:149365824
		Cognition	Attention and Processing	Cross-Sectional	HADS-A	cg11239219	298	0.7478	0.9772	0.05479	0.02153	0.3658	Island	chr4:149365887
		Cognition	Attention and Processing	Cross-Sectional	HADS-A	cg10002915	298	0.3882	0.9772	0.54242	0.08455	0.73095	S_Shelf	chr4:149369175
		Cognition	Attention and Processing	Cross-Sectional	HADS-A	cg15374100	298	0.968	0.9961	0.86961	0.01354	0.2065	OpenSea	chr5:142651239
		Cognition	Attention and Processing	Cross-Sectional	HADS-A	cg15740681	298	0.9623	0.9961	0.89095	0.00925	0.09622	OpenSea	chr5:142653066
		Cognition	Attention and Processing	Cross-Sectional	HADS-A	cg26081259	298	0.6445	0.9772	0.92585	0.00714	0.05144	OpenSea	chr5:142659682
		Cognition	Attention and Processing	Cross-Sectional	HADS-A	cg13514002	298	0.7707	0.9772	0.9104	0.01216	0.16497	OpenSea	chr5:142677292
		Cognition	Attention and Processing	Cross-Sectional	HADS-A	cg24801588	298	0.7589	0.9772	0.87613	0.01121	0.08119	OpenSea	chr5:142689858
		Cognition	Attention and Processing	Cross-Sectional	HADS-A	cg00407401	298	0.8249	0.9772	0.88336	0.0113	0.12225	OpenSea	chr5:142690959
		Cognition	Attention and Processing	Cross-Sectional	HADS-A	cg19457823	298	0.4904	0.9772	0.85324	0.04572	0.44993	OpenSea	chr5:142692961
		Cognition	Attention and Processing	Cross-Sectional	HADS-A	cg12741214	298	0.507	0.9772	0.92153	0.00739	0.05446	OpenSea	chr5:142695619
		Cognition	Attention and Processing	Cross-Sectional	HADS-A	cg04457787	298	0.941	0.9961	0.91851	0.00864	0.10367	OpenSea	chr5:142695636
		Cognition	Attention and Processing	Cross-Sectional	HADS-A	cg20728768	298	0.3025	0.9772	0.28495	0.05593	0.42144	OpenSea	chr5:142696594
		Cognition	Attention and Processing	Cross-Sectional	HADS-A	cg25708981	298	0.2774	0.9772	0.81142	0.04619	0.93615	OpenSea	chr5:142697868
		Cognition	Attention and Processing	Cross-Sectional	HADS-A	cg19645279	298	0.8774	0.9844	0.50627	0.03156	0.23017	OpenSea	chr5:142702733
		Cognition	Attention and Processing	Cross-Sectional	HADS-A	cg19176661	298	0.6271	0.9772	0.90339	0.00908	0.09406	OpenSea	chr5:142718549
		Cognition	Attention and Processing	Cross-Sectional	HADS-A	cg07715663	298	0.9853	0.9961	0.89993	0.0077	0.06068	OpenSea	chr5:142721796
		Cognition	Attention and Processing	Cross-Sectional	HADS-A	cg24052866	298	0.5555	0.9772	0.69336	0.03805	0.44354	OpenSea	chr5:142727470
		Cognition	Attention and Processing	Cross-Sectional	HADS-A	cg22233604	298	0.7564	0.9772	0.80239	0.02828	0.34628	OpenSea	chr5:142729377
		Cognition	Attention and Processing	Cross-Sectional	HADS-A	cg03857453	298	0.1856	0.9772	0.71757	0.04588	0.42058	OpenSea	chr5:142729913
		Cognition	Attention and Processing	Cross-Sectional	HADS-A	cg15115787	298	0.2046	0.9772	0.2334	0.0467	0.33835	OpenSea	chr5:142730701
		Cognition	Attention and Processing	Cross-Sectional	HADS-A	cg12888360	298	0.749	0.9772	0.19071	0.0335	0.21819	OpenSea	chr5:142732502
		Cognition	Attention and Processing	Cross-Sectional	HADS-A	cg18484679	298	0.1981	0.9772	0.85401	0.0155	0.16305	OpenSea	chr5:142740314
		Cognition	Attention and Processing	Cross-Sectional	HADS-A	cg16586394	298	0.769	0.9772	0.90913	0.01422	0.19939	OpenSea	chr5:142757011
		Cognition	Attention and Processing	Cross-Sectional	HADS-A	cg25535999	298	0.5533	0.9772	0.89419	0.01191	0.0902	OpenSea	chr5:142757312
		Cognition	Attention and Processing	Cross-Sectional	HADS-A	cg03746860	298	0.7835	0.9772	0.89502	0.01114	0.14119	OpenSea	chr5:142759375
		Cognition	Attention and Processing	Cross-Sectional	HADS-A	cg20598211	298	0.7226	0.9772	0.91627	0.01158	0.20941	OpenSea	chr5:142762454
		Cognition	Attention and Processing	Cross-Sectional	HADS-A	cg05483455	298	0.4571	0.9772	0.92855	0.00637	0.07369	OpenSea	chr5:142762613
		Cognition	Attention and Processing	Cross-Sectional	HADS-A	cg16594263	298	0.1075	0.9772	0.91923	0.01644	0.42455	OpenSea	chr5:142768048
		Cognition	Attention and Processing	Cross-Sectional	HADS-A	cg16535116	298	0.1746	0.9772	0.82395	0.0209	0.17773	OpenSea	chr5:142769612
		Cognition	Attention and Processing	Cross-Sectional	HADS-A	cg05900547	298	0.8407	0.9791	0.82362	0.01868	0.15468	OpenSea	chr5:142769791
		Cognition	Attention and Processing	Cross-Sectional	HADS-A	cg19432243	298	0.6587	0.9772	0.75237	0.06043	0.89556	OpenSea	chr5:142770757
		Cognition	Attention and Processing	Cross-Sectional	HADS-A	cg19820298	298	0.0806	0.9772	0.78285	0.05639	0.30689	OpenSea	chr5:142770782
		Cognition	Attention and Processing	Cross-Sectional	HADS-A	cg27107893	298	0.041	0.9772	0.79309	0.09578	0.9445	OpenSea	chr5:142776274
		Cognition	Attention and Processing	Cross-Sectional	HADS-A	cg17342132	298	0.3359	0.9772	0.86999	0.03297	0.31216	N_Shore	chr5:142780254
		Cognition	Attention and Processing	Cross-Sectional	HADS-A	cg07742588	298	0.2096	0.9772	0.78914	0.05595	0.91885	N_Shore	chr5:142780439
		Cognition	Attention and Processing	Cross-Sectional	HADS-A	cg00294552	298	0.6157	0.9772	0.84207	0.02221	0.20462	N_Shore	chr5:142780486
		Cognition	Attention and Processing	Cross-Sectional	HADS-A	cg16219186	298	0.5707	0.9772	0.88479	0.02148	0.22312	N_Shore	chr5:142780531
		Cognition	Attention and Processing	Cross-Sectional	HADS-A	cg08845721	298	0.689	0.9772	0.90291	0.02257	0.35006	N_Shore	chr5:142780693
		Cognition	Attention and Processing	Cross-Sectional	HADS-A	cg12969488	298	0.6951	0.9772	0.6959	0.03946	0.36342	N_Shore	chr5:142780984
		Cognition	Attention and Processing	Cross-Sectional	HADS-A	cg07733851	298	0.6997	0.9772	0.31012	0.05444	0.48866	N_Shore	chr5:142781498
		Cognition	Attention and Processing	Cross-Sectional	HADS-A	cg27122725	298	0.2335	0.9772	0.08247	0.03649	0.61758	N_Shore	chr5:142781723
		Cognition	Attention and Processing	Cross-Sectional	HADS-A	cg06952416	298	0.8992	0.9957	0.10317	0.01595	0.14679	N_Shore	chr5:142781736
		Cognition	Attention and Processing	Cross-Sectional	HADS-A	cg15910486	298	0.8743	0.9844	0.06987	0.01223	0.07877	Island	chr5:142783621
		Cognition	Attention and Processing	Cross-Sectional	HADS-A	cg01967637	298	0.8285	0.9772	0.05849	0.01419	0.08687	Island	chr5:142784019
		Cognition	Attention and Processing	Cross-Sectional	HADS-A	cg26464411	298	0.6177	0.9772	0.0622	0.01192	0.08127	Island	chr5:142784222
		Cognition	Attention and Processing	Cross-Sectional	HADS-A	cg06968181	298	0.5329	0.9772	0.05291	0.02403	0.66787	Island	chr5:142784323
		Cognition	Attention and Processing	Cross-Sectional	HADS-A	cg21702128	298	0.5275	0.9772	0.08227	0.00965	0.07742	Island	chr5:142784721
		Cognition	Attention and Processing	Cross-Sectional	HADS-A	cg18718518	298	0.8097	0.9772	0.53255	0.05217	0.3892	S_Shore	chr5:142785455
		Cognition	Attention and Processing	Cross-Sectional	HADS-A	cg13764763	298	0.9799	0.9961	0.85356	0.05856	0.5219	S_Shore	chr5:142785501
		Cognition	Attention and Processing	Cross-Sectional	HADS-A	cg16224829	298	0.6342	0.9772	0.79156	0.03531	0.28375	OpenSea	chr5:142792698
		Cognition	Attention and Processing	Cross-Sectional	HADS-A	cg01751279	298	0.7278	0.9772	0.83882	0.03986	0.35649	OpenSea	chr5:142793924
		Cognition	Attention and Processing	Cross-Sectional	HADS-A	cg23430507	298	0.75	0.9772	0.67871	0.03655	0.31636	OpenSea	chr5:142798375
		Cognition	Attention and Processing	Cross-Sectional	HADS-A	cg17349736	298	0.0695	0.9772	0.8687	0.01502	0.1392	OpenSea	chr5:142802329
		Cognition	Attention and Processing	Cross-Sectional	HADS-A	cg14438279	298	0.2252	0.9772	0.80706	0.05892	0.46785	OpenSea	chr5:142806343
		Cognition	Attention and Processing	Cross-Sectional	HADS-A	cg08423118	298	0.4068	0.9772	0.77492	0.07191	0.32112	OpenSea	chr5:142808610
		Cognition	Attention and Processing	Cross-Sectional	HADS-A	cg23776787	298	0.7006	0.9772	0.05181	0.01906	0.42487	OpenSea	chr5:142814315
		Cognition	Attention and Processing	Cross-Sectional	HADS-A	cg03906910	298	0.2668	0.9772	0.22081	0.05239	0.37839	OpenSea	chr5:142814388
		Cognition	Attention and Processing	Cross-Sectional	HADS-A	cg07589972	298	0.6555	0.9772	0.90005	0.01417	0.2547	OpenSea	chr5:142815463
		Cognition	Attention and Processing	Cross-Sectional	HADS-A	cg12466613	298	0.2622	0.9772	0.91748	0.01192	0.24478	OpenSea	chr5:142815469
		Cognition	Attention and Processing	Cross-Sectional	HADS-A	cg21979215	298	0.0727	0.9772	0.76917	0.06877	0.39558	OpenSea	chr5:142815807
		Cognition	Attention and Processing	Cross-Sectional	HADS-A	cg11022710	298	0.0888	0.9772	0.90751	0.01966	0.20763	OpenSea	chr5:142820479
		Cognition	Attention and Processing	Longitudinal	HADS-A	cg23650353	268	0.4196	0.942	0.92108	0.028	0.43394	OpenSea	chr4:148993643
		Cognition	Attention and Processing	Longitudinal	HADS-A	cg19491599	268	0.4889	0.942	0.84529	0.0161	0.20857	OpenSea	chr4:149000607
		Cognition	Attention and Processing	Longitudinal	HADS-A	cg10207656	268	0.6769	0.9613	0.90855	0.01373	0.20071	OpenSea	chr4:149019526
		Cognition	Attention and Processing	Longitudinal	HADS-A	cg09143276	268	0.3123	0.942	0.80845	0.02074	0.13091	OpenSea	chr4:149066518
		Cognition	Attention and Processing	Longitudinal	HADS-A	cg13000004	268	0.6306	0.9613	0.86983	0.01161	0.09813	OpenSea	chr4:149074093
		Cognition	Attention and Processing	Longitudinal	HADS-A	cg10590842	268	0.8078	0.9613	0.9034	0.01143	0.10122	OpenSea	chr4:149083955
		Cognition	Attention and Processing	Longitudinal	HADS-A	cg21701890	268	0.462	0.942	0.61622	0.02898	0.23369	OpenSea	chr4:149094632
		Cognition	Attention and Processing	Longitudinal	HADS-A	cg27234800	268	0.3424	0.942	0.89127	0.0525	0.39493	OpenSea	chr4:149116611
		Cognition	Attention and Processing	Longitudinal	HADS-A	cg25672354	268	0.6895	0.9613	0.86697	0.01933	0.23574	OpenSea	chr4:149122383
		Cognition	Attention and Processing	Longitudinal	HADS-A	cg10993059	268	0.4169	0.942	0.892	0.014	0.24786	OpenSea	chr4:149123062
		Cognition	Attention and Processing	Longitudinal	HADS-A	cg07335874	268	0.1857	0.9406	0.89734	0.01678	0.25463	OpenSea	chr4:149136507
		Cognition	Attention and Processing	Longitudinal	HADS-A	cg08264907	268	0.3138	0.942	0.90365	0.00834	0.08404	OpenSea	chr4:149144045
		Cognition	Attention and Processing	Longitudinal	HADS-A	cg07275757	268	0.1225	0.9386	0.89578	0.01331	0.13086	OpenSea	chr4:149189974
		Cognition	Attention and Processing	Longitudinal	HADS-A	cg13157799	268	0.6494	0.9613	0.05908	0.01227	0.14832	OpenSea	chr4:149191991
		Cognition	Attention and Processing	Longitudinal	HADS-A	cg00328411	268	0.7235	0.9613	0.90656	0.00839	0.10838	OpenSea	chr4:149205617
		Cognition	Attention and Processing	Longitudinal	HADS-A	cg02471166	268	0.9049	0.9613	0.62905	0.02431	0.28086	OpenSea	chr4:149244985
		Cognition	Attention and Processing	Longitudinal	HADS-A	cg27225476	268	0.9496	0.98	0.85878	0.01502	0.11725	OpenSea	chr4:149275542
		Cognition	Attention and Processing	Longitudinal	HADS-A	cg06240648	268	0.6685	0.9613	0.90857	0.00875	0.08216	OpenSea	chr4:149289762
		Cognition	Attention and Processing	Longitudinal	HADS-A	cg04867484	268	0.7035	0.9613	0.06179	0.03171	0.6046	OpenSea	chr4:149297469
		Cognition	Attention and Processing	Longitudinal	HADS-A	cg19496136	268	0.1099	0.9386	0.74636	0.06158	0.84904	OpenSea	chr4:149336765
		Cognition	Attention and Processing	Longitudinal	HADS-A	cg17253842	268	0.0136	0.9095	0.87057	0.02004	0.40157	OpenSea	chr4:149347991
		Cognition	Attention and Processing	Longitudinal	HADS-A	cg19650300	268	0.079	0.9386	0.87161	0.0124	0.12937	OpenSea	chr4:149357960
		Cognition	Attention and Processing	Longitudinal	HADS-A	cg09238384	268	0.0523	0.9386	0.88033	0.01059	0.10479	OpenSea	chr4:149358199
		Cognition	Attention and Processing	Longitudinal	HADS-A	cg07651033	268	0.1149	0.9386	0.891	0.01412	0.08448	OpenSea	chr4:149359043
		Cognition	Attention and Processing	Longitudinal	HADS-A	cg23329208	268	0.674	0.9613	0.89218	0.01003	0.08891	N_Shelf	chr4:149360981
		Cognition	Attention and Processing	Longitudinal	HADS-A	cg05437692	268	0.3898	0.942	0.28837	0.04393	0.32226	N_Shore	chr4:149362435
		Cognition	Attention and Processing	Longitudinal	HADS-A	cg27460943	268	0.885	0.9613	0.08292	0.02603	0.31306	N_Shore	chr4:149362809
		Cognition	Attention and Processing	Longitudinal	HADS-A	cg01576854	268	0.3756	0.942	0.07386	0.01207	0.20464	Island	chr4:149363450
		Cognition	Attention and Processing	Longitudinal	HADS-A	cg13996731	268	0.1943	0.9406	0.05943	0.00984	0.12921	Island	chr4:149363522
		Cognition	Attention and Processing	Longitudinal	HADS-A	cg20140452	268	0.9065	0.9613	0.07045	0.00971	0.0619	Island	chr4:149363715
		Cognition	Attention and Processing	Longitudinal	HADS-A	cg10621979	268	0.2349	0.942	0.05355	0.018	0.29521	Island	chr4:149365824
		Cognition	Attention and Processing	Longitudinal	HADS-A	cg11239219	268	0.5154	0.9523	0.05479	0.02153	0.3658	Island	chr4:149365887
		Cognition	Attention and Processing	Longitudinal	HADS-A	cg10002915	268	0.1343	0.9386	0.54242	0.08455	0.73095	S_Shelf	chr4:149369175
		Cognition	Attention and Processing	Longitudinal	HADS-A	cg15374100	268	0.025	0.9095	0.86961	0.01354	0.2065	OpenSea	chr5:142651239
		Cognition	Attention and Processing	Longitudinal	HADS-A	cg15740681	268	0.4893	0.942	0.89095	0.00925	0.09622	OpenSea	chr5:142653066
		Cognition	Attention and Processing	Longitudinal	HADS-A	cg26081259	268	0.606	0.9613	0.92585	0.00714	0.05144	OpenSea	chr5:142659682
		Cognition	Attention and Processing	Longitudinal	HADS-A	cg13514002	268	0.7542	0.9613	0.9104	0.01216	0.16497	OpenSea	chr5:142677292
		Cognition	Attention and Processing	Longitudinal	HADS-A	cg24801588	268	0.3593	0.942	0.87613	0.01121	0.08119	OpenSea	chr5:142689858
		Cognition	Attention and Processing	Longitudinal	HADS-A	cg00407401	268	0.1734	0.9386	0.88336	0.0113	0.12225	OpenSea	chr5:142690959
		Cognition	Attention and Processing	Longitudinal	HADS-A	cg19457823	268	0.8745	0.9613	0.85324	0.04572	0.44993	OpenSea	chr5:142692961
		Cognition	Attention and Processing	Longitudinal	HADS-A	cg12741214	268	0.7194	0.9613	0.92153	0.00739	0.05446	OpenSea	chr5:142695619
		Cognition	Attention and Processing	Longitudinal	HADS-A	cg04457787	268	0.1404	0.9386	0.91851	0.00864	0.10367	OpenSea	chr5:142695636
		Cognition	Attention and Processing	Longitudinal	HADS-A	cg20728768	268	0.9587	0.98	0.28495	0.05593	0.42144	OpenSea	chr5:142696594
		Cognition	Attention and Processing	Longitudinal	HADS-A	cg25708981	268	0.4207	0.942	0.81142	0.04619	0.93615	OpenSea	chr5:142697868
		Cognition	Attention and Processing	Longitudinal	HADS-A	cg19645279	268	0.8073	0.9613	0.50627	0.03156	0.23017	OpenSea	chr5:142702733
		Cognition	Attention and Processing	Longitudinal	HADS-A	cg19176661	268	0.9705	0.9811	0.90339	0.00908	0.09406	OpenSea	chr5:142718549
		Cognition	Attention and Processing	Longitudinal	HADS-A	cg07715663	268	0.9195	0.9613	0.89993	0.0077	0.06068	OpenSea	chr5:142721796
		Cognition	Attention and Processing	Longitudinal	HADS-A	cg24052866	268	0.5945	0.9613	0.69336	0.03805	0.44354	OpenSea	chr5:142727470
		Cognition	Attention and Processing	Longitudinal	HADS-A	cg22233604	268	0.5846	0.9613	0.80239	0.02828	0.34628	OpenSea	chr5:142729377
		Cognition	Attention and Processing	Longitudinal	HADS-A	cg03857453	268	0.3704	0.942	0.71757	0.04588	0.42058	OpenSea	chr5:142729913
		Cognition	Attention and Processing	Longitudinal	HADS-A	cg15115787	268	0.3708	0.942	0.2334	0.0467	0.33835	OpenSea	chr5:142730701
		Cognition	Attention and Processing	Longitudinal	HADS-A	cg12888360	268	0.4256	0.942	0.19071	0.0335	0.21819	OpenSea	chr5:142732502
		Cognition	Attention and Processing	Longitudinal	HADS-A	cg18484679	268	0.3629	0.942	0.85401	0.0155	0.16305	OpenSea	chr5:142740314
		Cognition	Attention and Processing	Longitudinal	HADS-A	cg16586394	268	0.829	0.9613	0.90913	0.01422	0.19939	OpenSea	chr5:142757011
		Cognition	Attention and Processing	Longitudinal	HADS-A	cg25535999	268	0.2242	0.942	0.89419	0.01191	0.0902	OpenSea	chr5:142757312
		Cognition	Attention and Processing	Longitudinal	HADS-A	cg03746860	268	0.1182	0.9386	0.89502	0.01114	0.14119	OpenSea	chr5:142759375
		Cognition	Attention and Processing	Longitudinal	HADS-A	cg20598211	268	0.5303	0.9567	0.91627	0.01158	0.20941	OpenSea	chr5:142762454
		Cognition	Attention and Processing	Longitudinal	HADS-A	cg05483455	268	0.8596	0.9613	0.92855	0.00637	0.07369	OpenSea	chr5:142762613
		Cognition	Attention and Processing	Longitudinal	HADS-A	cg16594263	268	0.6576	0.9613	0.91923	0.01644	0.42455	OpenSea	chr5:142768048
		Cognition	Attention and Processing	Longitudinal	HADS-A	cg16535116	268	0.0297	0.9095	0.82395	0.0209	0.17773	OpenSea	chr5:142769612
		Cognition	Attention and Processing	Longitudinal	HADS-A	cg05900547	268	0.353	0.942	0.82362	0.01868	0.15468	OpenSea	chr5:142769791
		Cognition	Attention and Processing	Longitudinal	HADS-A	cg19432243	268	0.7232	0.9613	0.75237	0.06043	0.89556	OpenSea	chr5:142770757
		Cognition	Attention and Processing	Longitudinal	HADS-A	cg19820298	268	0.3979	0.942	0.78285	0.05639	0.30689	OpenSea	chr5:142770782
		Cognition	Attention and Processing	Longitudinal	HADS-A	cg27107893	268	0.1435	0.9386	0.79309	0.09578	0.9445	OpenSea	chr5:142776274
		Cognition	Attention and Processing	Longitudinal	HADS-A	cg17342132	268	0.7815	0.9613	0.86999	0.03297	0.31216	N_Shore	chr5:142780254
		Cognition	Attention and Processing	Longitudinal	HADS-A	cg07742588	268	0.5424	0.9596	0.78914	0.05595	0.91885	N_Shore	chr5:142780439
		Cognition	Attention and Processing	Longitudinal	HADS-A	cg00294552	268	0.9862	0.9862	0.84207	0.02221	0.20462	N_Shore	chr5:142780486
		Cognition	Attention and Processing	Longitudinal	HADS-A	cg16219186	268	0.4782	0.942	0.88479	0.02148	0.22312	N_Shore	chr5:142780531
		Cognition	Attention and Processing	Longitudinal	HADS-A	cg08845721	268	0.8829	0.9613	0.90291	0.02257	0.35006	N_Shore	chr5:142780693
		Cognition	Attention and Processing	Longitudinal	HADS-A	cg12969488	268	0.4905	0.942	0.6959	0.03946	0.36342	N_Shore	chr5:142780984
		Cognition	Attention and Processing	Longitudinal	HADS-A	cg07733851	268	0.1666	0.9386	0.31012	0.05444	0.48866	N_Shore	chr5:142781498
		Cognition	Attention and Processing	Longitudinal	HADS-A	cg27122725	268	0.7569	0.9613	0.08247	0.03649	0.61758	N_Shore	chr5:142781723
		Cognition	Attention and Processing	Longitudinal	HADS-A	cg06952416	268	0.798	0.9613	0.10317	0.01595	0.14679	N_Shore	chr5:142781736
		Cognition	Attention and Processing	Longitudinal	HADS-A	cg15910486	268	0.7942	0.9613	0.06987	0.01223	0.07877	Island	chr5:142783621
		Cognition	Attention and Processing	Longitudinal	HADS-A	cg01967637	268	0.7213	0.9613	0.05849	0.01419	0.08687	Island	chr5:142784019
		Cognition	Attention and Processing	Longitudinal	HADS-A	cg26464411	268	0.7833	0.9613	0.0622	0.01192	0.08127	Island	chr5:142784222
		Cognition	Attention and Processing	Longitudinal	HADS-A	cg06968181	268	0.3707	0.942	0.05291	0.02403	0.66787	Island	chr5:142784323
		Cognition	Attention and Processing	Longitudinal	HADS-A	cg21702128	268	0.2325	0.942	0.08227	0.00965	0.07742	Island	chr5:142784721
		Cognition	Attention and Processing	Longitudinal	HADS-A	cg18718518	268	0.1214	0.9386	0.53255	0.05217	0.3892	S_Shore	chr5:142785455
		Cognition	Attention and Processing	Longitudinal	HADS-A	cg13764763	268	0.1575	0.9386	0.85356	0.05856	0.5219	S_Shore	chr5:142785501
		Cognition	Attention and Processing	Longitudinal	HADS-A	cg16224829	268	0.5176	0.9523	0.79156	0.03531	0.28375	OpenSea	chr5:142792698
		Cognition	Attention and Processing	Longitudinal	HADS-A	cg01751279	268	0.4915	0.942	0.83882	0.03986	0.35649	OpenSea	chr5:142793924
		Cognition	Attention and Processing	Longitudinal	HADS-A	cg23430507	268	0.6483	0.9613	0.67871	0.03655	0.31636	OpenSea	chr5:142798375
		Cognition	Attention and Processing	Longitudinal	HADS-A	cg17349736	268	0.4434	0.942	0.8687	0.01502	0.1392	OpenSea	chr5:142802329
		Cognition	Attention and Processing	Longitudinal	HADS-A	cg14438279	268	0.8572	0.9613	0.80706	0.05892	0.46785	OpenSea	chr5:142806343
		Cognition	Attention and Processing	Longitudinal	HADS-A	cg08423118	268	0.8655	0.9613	0.77492	0.07191	0.32112	OpenSea	chr5:142808610
		Cognition	Attention and Processing	Longitudinal	HADS-A	cg23776787	268	0.9187	0.9613	0.05181	0.01906	0.42487	OpenSea	chr5:142814315
		Cognition	Attention and Processing	Longitudinal	HADS-A	cg03906910	268	0.4055	0.942	0.22081	0.05239	0.37839	OpenSea	chr5:142814388
		Cognition	Attention and Processing	Longitudinal	HADS-A	cg07589972	268	0.4786	0.942	0.90005	0.01417	0.2547	OpenSea	chr5:142815463
		Cognition	Attention and Processing	Longitudinal	HADS-A	cg12466613	268	0.4711	0.942	0.91748	0.01192	0.24478	OpenSea	chr5:142815469
		Cognition	Attention and Processing	Longitudinal	HADS-A	cg21979215	268	0.7936	0.9613	0.76917	0.06877	0.39558	OpenSea	chr5:142815807
		Cognition	Attention and Processing	Longitudinal	HADS-A	cg11022710	268	0.1335	0.9386	0.90751	0.01966	0.20763	OpenSea	chr5:142820479
		Cognition	Attention and Processing	Cross-Sectional	HADS-D	cg23650353	298	0.1562	0.8823	0.92108	0.028	0.43394	OpenSea	chr4:148993643
		Cognition	Attention and Processing	Cross-Sectional	HADS-D	cg19491599	298	0.0521	0.7989	0.84529	0.0161	0.20857	OpenSea	chr4:149000607
		Cognition	Attention and Processing	Cross-Sectional	HADS-D	cg10207656	298	0.0168	0.4679	0.90855	0.01373	0.20071	OpenSea	chr4:149019526
		Cognition	Attention and Processing	Cross-Sectional	HADS-D	cg09143276	298	0.7433	0.9386	0.80845	0.02074	0.13091	OpenSea	chr4:149066518
		Cognition	Attention and Processing	Cross-Sectional	HADS-D	cg13000004	298	0.1397	0.8823	0.86983	0.01161	0.09813	OpenSea	chr4:149074093
		Cognition	Attention and Processing	Cross-Sectional	HADS-D	cg10590842	298	0.1408	0.8823	0.9034	0.01143	0.10122	OpenSea	chr4:149083955
		Cognition	Attention and Processing	Cross-Sectional	HADS-D	cg21701890	298	0.7067	0.9386	0.61622	0.02898	0.23369	OpenSea	chr4:149094632
		Cognition	Attention and Processing	Cross-Sectional	HADS-D	cg27234800	298	0.3669	0.9275	0.89127	0.0525	0.39493	OpenSea	chr4:149116611
		Cognition	Attention and Processing	Cross-Sectional	HADS-D	cg25672354	298	0.4229	0.9275	0.86697	0.01933	0.23574	OpenSea	chr4:149122383
		Cognition	Attention and Processing	Cross-Sectional	HADS-D	cg10993059	298	0.4738	0.9275	0.892	0.014	0.24786	OpenSea	chr4:149123062
		Cognition	Attention and Processing	Cross-Sectional	HADS-D	cg07335874	298	0.549	0.9386	0.89734	0.01678	0.25463	OpenSea	chr4:149136507
		Cognition	Attention and Processing	Cross-Sectional	HADS-D	cg08264907	298	0.5671	0.9386	0.90365	0.00834	0.08404	OpenSea	chr4:149144045
		Cognition	Attention and Processing	Cross-Sectional	HADS-D	cg07275757	298	0.6269	0.9386	0.89578	0.01331	0.13086	OpenSea	chr4:149189974
		Cognition	Attention and Processing	Cross-Sectional	HADS-D	cg13157799	298	0.7407	0.9386	0.05908	0.01227	0.14832	OpenSea	chr4:149191991
		Cognition	Attention and Processing	Cross-Sectional	HADS-D	cg00328411	298	0.8064	0.9488	0.90656	0.00839	0.10838	OpenSea	chr4:149205617
		Cognition	Attention and Processing	Cross-Sectional	HADS-D	cg02471166	298	0.1177	0.8823	0.62905	0.02431	0.28086	OpenSea	chr4:149244985
		Cognition	Attention and Processing	Cross-Sectional	HADS-D	cg27225476	298	0.6343	0.9386	0.85878	0.01502	0.11725	OpenSea	chr4:149275542
		Cognition	Attention and Processing	Cross-Sectional	HADS-D	cg06240648	298	0.2414	0.8823	0.90857	0.00875	0.08216	OpenSea	chr4:149289762
		Cognition	Attention and Processing	Cross-Sectional	HADS-D	cg04867484	298	0.108	0.8823	0.06179	0.03171	0.6046	OpenSea	chr4:149297469
		Cognition	Attention and Processing	Cross-Sectional	HADS-D	cg19496136	298	0.2589	0.8823	0.74636	0.06158	0.84904	OpenSea	chr4:149336765
		Cognition	Attention and Processing	Cross-Sectional	HADS-D	cg17253842	298	0.2987	0.9275	0.87057	0.02004	0.40157	OpenSea	chr4:149347991
		Cognition	Attention and Processing	Cross-Sectional	HADS-D	cg19650300	298	0.5074	0.9386	0.87161	0.0124	0.12937	OpenSea	chr4:149357960
		Cognition	Attention and Processing	Cross-Sectional	HADS-D	cg09238384	298	0.8814	0.956	0.88033	0.01059	0.10479	OpenSea	chr4:149358199
		Cognition	Attention and Processing	Cross-Sectional	HADS-D	cg07651033	298	0.1734	0.8823	0.891	0.01412	0.08448	OpenSea	chr4:149359043
		Cognition	Attention and Processing	Cross-Sectional	HADS-D	cg23329208	298	0.6249	0.9386	0.89218	0.01003	0.08891	N_Shelf	chr4:149360981
		Cognition	Attention and Processing	Cross-Sectional	HADS-D	cg05437692	298	0.8138	0.9488	0.28837	0.04393	0.32226	N_Shore	chr4:149362435
		Cognition	Attention and Processing	Cross-Sectional	HADS-D	cg27460943	298	0.7573	0.9386	0.08292	0.02603	0.31306	N_Shore	chr4:149362809
		Cognition	Attention and Processing	Cross-Sectional	HADS-D	cg01576854	298	0.3243	0.9275	0.07386	0.01207	0.20464	Island	chr4:149363450
		Cognition	Attention and Processing	Cross-Sectional	HADS-D	cg13996731	298	0.4552	0.9275	0.05943	0.00984	0.12921	Island	chr4:149363522
		Cognition	Attention and Processing	Cross-Sectional	HADS-D	cg20140452	298	0.8833	0.956	0.07045	0.00971	0.0619	Island	chr4:149363715
		Cognition	Attention and Processing	Cross-Sectional	HADS-D	cg10621979	298	0.4684	0.9275	0.05355	0.018	0.29521	Island	chr4:149365824
		Cognition	Attention and Processing	Cross-Sectional	HADS-D	cg11239219	298	0.9968	0.9968	0.05479	0.02153	0.3658	Island	chr4:149365887
		Cognition	Attention and Processing	Cross-Sectional	HADS-D	cg10002915	298	0.2331	0.8823	0.54242	0.08455	0.73095	S_Shelf	chr4:149369175
		Cognition	Attention and Processing	Cross-Sectional	HADS-D	cg15374100	298	0.5567	0.9386	0.86961	0.01354	0.2065	OpenSea	chr5:142651239
		Cognition	Attention and Processing	Cross-Sectional	HADS-D	cg15740681	298	0.6273	0.9386	0.89095	0.00925	0.09622	OpenSea	chr5:142653066
[truncated: 6,538 more rows]
